# Supplementary material for: Mechanism research on inhibition of gastric cancer in vitro by the extract of Pinellia ternata based on network pharmacology and cellular metabolomics
Source: Open Med (Wars). 2025 Feb 18;20(1):20241131. doi: 10.1515/med-2024-1131 (PMC11843166; doi:10.1515/med-2024-1131)
Supplement: Supplementary Table 2 [file med-2024-1131-s2.xlsx]

## Sheet: Sheet1
Mode	Index	Compounds	物质	Class I	物质一级分类	Class II	物质二级分类	Formula	Q1 (Da)	Molecular weight (Da)	RT (min)	Adduct	Mass error	Level	score	LC mode	CAS	PubChem	HMDB	Metlin	cpd_ID	PTE-H1	PTE-H2	PTE-H3	PTE-H4	PTE-H5	PTE-H6	PTE-B1	PTE-B2	PTE-B3	PTE-B4	PTE-B5	PTE-B6	Ctrl-H1	Ctrl-H2	Ctrl-H3	Ctrl-H4	Ctrl-H5	Ctrl-H6	Ctrl-B1	Ctrl-B2	Ctrl-B3	Ctrl-B4	Ctrl-B5	Ctrl-B6	QC01	QC02	QC03	QC04
C18_positive	ZINC968246	p-Cymene	对伞花烃	Others	其他	Hydrocarbon derivatives	烃衍生物	C10H14	181.122	134.11	3.9351	M+HCOO+2H	0.652379	2	0.6819	rp	99-87-6	7463	HMDB0005805	-	C06575	1.119	0.476	0.696	2.155	0.655	0.307	1.223	1.406	0.729	1.454	1.193	0.622	1.328	9.774	0.502	0.318	0.512	0.191	0.761	0.583	1.026	0.401	1.159	1.283	112.471	112.721	112.155	112.074
C18_positive	MW0103076	Valproic acid	丙戊酸	Organic acid and Its derivatives	有机酸及其衍生物	Organic acid and Its derivatives	有机酸及其衍生物	C8H16O2	145.122	144.115	4.2581	M+H	1.39217	2	0.717	rp	99-66-1	3121	HMDB0001877	2986	C07185	5093.72	4647.45	4801.38	5373.32	4398.39	4642.1	4922.41	5479.71	5977.98	5010.19	5179.98	5181.02	4912.41	5564.96	3952.1	3855.41	4288.02	4968.35	6828.93	4660.24	5232.94	5652	7478.14	5714.03	7043.78	6896.83	6978.52	6965.01
C18_positive	MW0124165	Fosthiazate	噻唑磷酯	Heterocyclic compounds	杂环化合物	Heterocyclic compounds	杂环化合物	C9H18NO3PS2	284.05	283.047	9.6832	M+H	9.57042	2	0.8422	rp	98886-44-3	91758	-	72210	C18402	4.675	3.415	0.686	1.84	0.659	3.829	2.14	3.481	1.618	3.63	2.8	3.093	0.218	18.292	0.085	0.42	0.605	3.741	3.25	1.279	3.245	4.316	1.901	5.86	153.178	149.317	156.013	136.32
C18_positive	MW0108886	N-Ornithyl-L-taurine	N-鸟氨酰-L-牛磺酸	Amino acid and Its metabolites	氨基酸及其代谢物	Amino acid derivatives	氨基酸衍生物	C7H17N3O4S	262.086	239.094	2.0039	M+Na	2.442	4	0.9425	rp	98349-67-8	14257919	HMDB0033519	-	-	13.684	27.51	68.725	40.896	3.211	16.202	30.253	22.34	13.593	3.097	6.364	24.878	53.13	142.564	1.217	12.856	27.534	16.414	11.193	8.134	3.088	19.482	68.639	25.07	485.079	523.966	508.364	505.868
C18_positive	MW0052908	Finasteride	非那雄胺	Heterocyclic compounds	杂环化合物	Heterocyclic compounds	杂环化合物	C23H36N2O2	390.32	372.278	8.9196	M+NH4	22.5315	2	0.6232	rp	98319-26-7	57363	HMDB0001984	-	D00321	95964.5	102952	72441.3	96458.1	53917.5	53521.5	66360.1	92492.6	135242	65785.1	100013	75337.9	15940.3	98261.7	58654.9	6541.51	109259	49474.6	11325.2	97731.9	121651	36490.5	116059	46540.5	14340.7	11748.1	9914.71	11977.6
C18_positive	MW0143045	Win I(S)	5-(7-(4-(4-甲基-4，5-二氢恶唑-2-基）苯氧基）庚基)-3-甲基异恶唑	Benzene and substituted derivatives	苯及其衍生物	Phenolics	苯酚类	C21H28N2O3	357.214	356.21	2.1251	M+H	2.51775	4	0.6909	rp	98034-32-3 | 120666-36-6	1790	-	-	C06497	0.827	1.043	1.46	1.082	0.275	2.726	3.713	1.89	1.13	18.889	0.941	1.485	1.199	6.632	0.587	0.192	0.908	1.727	0.576	11.508	0.707	13.22	1.301	1.122	81.928	85.427	85.041	82.624
C18_positive	MW0109780	3-Sulfopyruvic acid	3-磺基丙酮酸；3-磺基丙酮酸	Organic acid and Its derivatives	有机酸及其衍生物	Organic acid and Its derivatives	有机酸及其衍生物	C3H4O6S	168.982	167.973	13.6623	M+H	2.8535	4	0.6835	rp	98022-26-5	440717	HMDB0004045	-	C05528	1290.57	840.583	639.546	2901.13	733.102	636.61	920.996	777.798	933.056	878.34	932.639	752.841	651.941	928.23	758.112	650.181	792.769	785.009	1002.68	1404.85	754.136	1631.96	836.596	796.725	872.571	904.075	890.237	880.728
C18_positive	MW0154557	N-Butyl-11-[(7R,8R,9S,13S,14S,17S)-3,17-dihydroxy-13-methyl-7,8,9,11,12,13,14,15,16,17-decahydro-6H-cyclopenta[A]phenanthren-7-YL]-N-methylundecanamide	N-丁基-11-[(7R,8R,9S,13S,14S,17S)-3,17-二羟基-13-甲基-7,8,9,11,12,13,14,15,16,17 -decahydro-6H-cyclopenta[A]phe-thren-7-YL]-N-methylundecanamide	Hormones and hormone related compounds	激素及激素相关物质	Hormones and hormone related compounds	激素及激素相关物质	C34H55NO3	526.432	525.418	10.8537	M+H	11.1443	3	0.5766	rp	98007-99-9	104772	-	-	-	1.09395e+06	1.01904e+06	1.14267e+06	1.21994e+06	1.17532e+06	1.14006e+06	1.2092e+06	1.77249e+06	1.4473e+06	1.29851e+06	1.25807e+06	1.1637e+06	1.20571e+06	1.35128e+06	1.02063e+06	1.03746e+06	1.1447e+06	977426	1.24922e+06	1.17268e+06	1.30696e+06	1.35099e+06	1.35368e+06	1.44106e+06	1.20056e+06	1.1989e+06	1.20922e+06	1.21408e+06
C18_positive	MW0126293	Pyrazinamide	吡嗪酰胺	Organic acid and Its derivatives	有机酸及其衍生物	Organic acid and Its derivatives	有机酸及其衍生物	C5H5N3O	124.058	123.043	1.5156	M+H	18.3125	2	0.8026	rp	98-96-4	1046	HMDB0014483	-	C01956	2756.24	2643.06	2920.39	2555.41	2546.21	2571.58	11980.2	12703.6	12556.5	11863.2	13153.7	11965.9	2282.08	2566.78	2241.92	2420.81	2321.76	3585.02	11701.8	8182.86	10380.1	8522.35	8643.69	10164.4	8290.48	8410.21	8320.2	8271.65
C18_positive	MW0169549	Niacinamide	烟酰胺	Alcohol and amines	醇、胺类	Amines	胺类	C6H6N2O	123.055	122.048	1.5156	M+H	0.300883	1	0.8907	rp	98-92-0	936	HMDB0001406	1497	C00153	41130	39294.2	40464.3	40368.1	37896.4	38410.1	172735	164479	170520	156381	172220	168681	37228.5	40935.1	31860.8	37997.5	34850.3	50307.4	147238	107989	142089	117890	122941	134771	112810	114008	112653	111999
C18_positive	MW0113853	Acetophenone	苯乙酮	Aldehyde,Ketones,Esters	醛、酮、酯类	Ketones	酮类	C8H8O	205.03	120.058	12.7328	M+K+HCOOH	8.17468	2	0.7099	rp	98-86-2	7410	HMDB0033910	-	C07113	10352.6	9827.32	12852.3	9896.11	12453.5	11404.9	9794.83	10925.3	13393.9	10601	10877.1	10134.3	10212.3	13752.8	5958.26	10178.2	13501.5	12661.9	18645.4	6429.92	13910.7	10093	12604.7	11285.6	10670.1	10437.8	10941	8965.19
C18_positive	MEDP0525	N-Acetyl-L-alanine	N-乙酰基-L-丙氨酸	Amino acid and Its metabolites	氨基酸及其代谢物	Amino acid derivatives	氨基酸衍生物	C5H9NO3	154.042	131.058	2.583	M+Na	14.1471	2	0.7239	rp	97-69-8	88064	HMDB0000766	5733	-	122553	106949	109612	118171	120477	114849	123594	121737	144567	125293	138576	122105	147678	179623	116654	86231.4	130029	105016	153547	108833	136386	138013	151089	144990	125846	126824	125865	127771
C18_positive	MW0016414	Carvyl acetate	香芹醇乙酸酯	Aldehyde,Ketones,Esters	醛、酮、酯类	Esters	酯类	C12H18O2	241.145	194.131	5.6378	M+HCOO+2H	3.12	2	0.7208	rp	97-42-7	7335	HMDB0038046	-	-	1.236	0.552	0.772	1.302	0.517	2.618	1.549	2.901	1.429	2.093	0.444	0.438	0.945	6.175	1.626	0.496	0.865	0.54	0.244	1.564	0.329	1.156	2.557	1.469	53.454	54.775	52.19	56.01
C18_positive	MW0009611	Pyridaben	哒螨灵	Benzene and substituted derivatives	苯及其衍生物	Benzene and substituted derivatives	苯及其衍生物	C19H25ClN2OS	365.137	364.138	9.3792	M+H	23.0217	2	0.8277	rp	96489-71-3	91754	-	72412	C18614	28262.6	30280	33703.6	34956.9	31238.4	29788.3	41559.9	56805.8	48150.4	41185.7	39659.1	38589.4	34307.9	37599.8	27714.7	30132.8	37612.2	27027.4	35780.2	33850.1	40067.8	40496.3	44229.5	42252	33531.2	33423.8	32389.5	32559.5
C18_positive	MW0010405	Methylcyclopentane	甲基环戊烷	Others	其他	Hydrocarbon derivatives	烃衍生物	C6H12	107.085	84.0939	8.3281	M+Na	2.74895	4	0.6858	rp	96-37-7	7296	HMDB0031542	-	-	856450	843612	774072	303.995	868243	835782	264.797	895962	976142	898689	913308	864712	933193	2161.02	227.401	833967	174.819	810908	951765	894264	895795	284.193	811625	873885	33246.1	35720.2	30930.3	36061.6
C18_positive	MW0118206	2-Amino-3,4,8-trimethyl-3H-imidazo[4,5-f]quinoxaline	2-氨基-3，4，8-三甲基-3H-咪唑并[4，5-f]喹喔啉	Heterocyclic compounds	杂环化合物	Heterocyclic compounds	杂环化合物	C12H13N5	266.078	227.117	2.5071	M+K	5.23875	4	0.6348	rp	95896-78-9	104739	HMDB0032928	-	-	1021.06	1094.21	1175.62	804.089	1039.77	571.745	2245.88	1910.5	2554.17	2550.65	2382.25	2075.82	599.584	364.284	894.271	910.01	1168.67	720.756	1637.45	1673.9	1553.94	1081.55	1667.23	1448.6	1863.54	1983.09	1826.08	1550.73
C18_positive	MW0114476	Formyl-5-hydroxykynurenamine	甲酰基-5-羟基犬尿素	Alcohol and amines	醇、胺类	Amines	胺类	C10H12N2O3	191.082	208.085	2.5071	M+H-H2O	0.525	3	0.8503	rp	958733-17-0	440743	HMDB0012948	-	C05647	803.321	373.193	830.428	923.072	409.408	657.785	2014.47	2332.96	1764.78	2083.08	1226.85	2195.79	607.866	242.513	591.196	493.373	294.987	868.635	1287.4	1422.06	1048.68	1414.4	1568.44	1386.88	2277.95	2360.04	2238.41	2213.64
C18_positive	MW0157377	Teleocidin B-1	Teleocidin B-1	Benzene and substituted derivatives	苯及其衍生物	Benzene and substituted derivatives	苯及其衍生物	C28H41N3O2	452.331	451.32	8.3688	M+H	8.82674	3	0.8528	rp	95044-71-6	185384	-	-	C05150	19705.6	21408.4	21907.6	23127.9	20575	20242	23715.5	23756.3	30148.1	24093	20754.7	20273.3	22000.8	25118.8	19076.9	17935.8	20438.9	20271.3	23684.3	19848.6	21964.8	23240.7	22784.3	26207.8	21464	21782.1	21514.1	21394.4
C18_positive	MW0001276	1,2,4-Trimethylbenzene	1,2,4-三甲苯	Benzene and substituted derivatives	苯及其衍生物	Benzene and substituted derivatives	苯及其衍生物	C9H12	105.07	120.094	4.2428	M+H-CH4	2.251	4	0.6968	rp	95-63-6	7247	HMDB0013733	-	C14533	66.137	32.491	57.374	47.724	58.26	51.673	39.503	79.726	59.256	73.953	40.856	59.131	29.338	65.312	38.491	56.66	41.801	60.058	8.271	70.941	44.202	53.246	64.157	67.829	555.454	561.675	544.124	553.5
C18_positive	MW0009287	O-Toluidine	邻甲苯胺	Benzene and substituted derivatives	苯及其衍生物	Benzene and substituted derivatives	苯及其衍生物	C7H9N	360.191	107.073	2.5071	3M+K	6.25175	4	0.6158	rp	95-53-4	7242	HMDB0041965	-	C14403	6.78517e+06	6.68346e+06	6.13254e+06	7.6752e+06	555.911	6.62067e+06	3479.51	551.071	3468.87	7.11981e+06	7.23562e+06	6.85063e+06	7.39316e+06	8.15987e+06	1189.75	6.60706e+06	6.89867e+06	6.42437e+06	7.55342e+06	7.08459e+06	7.17954e+06	6.99602e+06	6.4555e+06	6.98979e+06	28924.3	28219.1	28302.7	27752.5
C18_positive	MW0118391	2-Chloro-3-chloromethyl-6-fluoroquinoline	2-氯-3-氯甲基-6-氟喹啉	Heterocyclic compounds	杂环化合物	Heterocyclic compounds	杂环化合物	C10H6Cl2FN	251.975	228.986	1.0028	M+Na	0.33225	4	0.9918	rp	948291-04-1	17039794	-	-	-	90056.4	124021	99565	122316	74500.4	88005.6	89078.6	80478.6	60969.8	72402.6	68928.1	69294.2	125348	180641	79907.1	118438	89939.5	32917.2	64700.7	42103.7	106589	101040	134515	137388	77876.6	77404.3	77115.7	77849.8
C18_positive	MW0122211	6-Hydroxynicotinonitrile	6-羟基烟腈	Heterocyclic compounds	杂环化合物	Heterocyclic compounds	杂环化合物	C6H4N2O	158.996	120.032	0.2436	M+K	0.907	4	0.7278	rp	94805-52-4 | 95891-30-8	7062197	-	-	-	21139.1	22775.3	21358.5	26498	20712.6	22732.5	21218.2	17287.7	14358.9	24593.7	30834.3	22319.1	23489	28910.3	19305.8	20459	23016	19668	22737	29166.2	26057.3	25135	26583.8	23062.4	22609.3	23130	23480.5	23125.7
C18_positive	MW0145223	N-(2-hydroxyethyl-1,1,2,2-d4)-5Z,8Z,11Z,14Z-eicosatetraenamide	N-(2-羟乙基-1,1,2,2-d4)-5Z,8Z,11Z,14Z-二十碳四烯酰胺	Alcohol and amines	醇、胺类	Amines	胺类	C22H37NO2	352.321	347.282	6.5237	M+H	16.9162	2	0.8207	rp	946524-40-9	24762159	-	96417	-	16705	13588	14153.2	13387.2	13485.5	14401.1	118695	119729	122666	122141	118874	127648	9293.88	15469.4	20815.9	14256.4	10093.3	8592.47	41063.9	23651.5	70111.5	95374.2	64284.2	109615	33572.9	33815.8	33432.2	33380.8
C18_positive	MW0016034	Bacopaside X	假马齿苋 X	Steroids	甾体	Steroid	甾体	C46H74O17	461.25	898.493	12.2751	M+H+Na	7.12154	4	0.6002	rp	94443-88-6	10629555	-	-	-	695.939	861.009	620.091	1005.4	1113.8	1207.61	531.411	521.957	1343.88	479.571	693.279	159.699	679.336	1433.19	656.098	755.151	202.795	300.666	838.925	401.09	1030.68	841.867	462.651	778.31	751.088	364.609	820.604	775.389
C18_positive	MW0110913	Anandamide	花生四烯酰乙醇胺	Alcohol and amines	醇、胺类	Amines	胺类	C22H37NO2	348.29	347.282	5.6378	M+H	2.87635	2	0.8926	rp	94421-68-8	5281969	HMDB0004080	-	C11695	39856.7	36927	40937.1	45312.9	36604.4	38579.9	316704	368582	350994	363965	357564	301635	193204	252069	174078	141703	194001	232940	238515	239968	265320	221686	251000	344035	171760	172572	174463	172939
C18_positive	MW0111241	Palmitoleoyl Ethanolamide	棕榈油酰乙醇酰胺	FA	脂肪酰类	Others	其他	C18H35NO2	298.275	297.267	6.3866	M+H	10.182	2	0.6783	rp	94421-67-7	9835868	HMDB0013648	-	-	1824.21	738.755	810.24	1190.19	1863.16	1620.09	4213.92	4877.99	15390.5	2264.63	6571.38	4037.39	42.215	66.468	107.145	65.802	99.228	170.964	122.058	57.58	103.959	58.602	44.709	68.064	1895.93	1940.68	1884.48	2036.87
C18_positive	MW0145066	Anacyclin	（2E，4E)-N-(2-甲基丙基)-2，4-十四碳二烯-8，10-二酰胺	Aldehyde,Ketones,Esters	醛、酮、酯类	Esters	酯类	C18H25NO	124.039	271.194	1.1677	M+Na+2K	5.96375	4	0.6211	rp	94413-18-0 | 502-57-8	5281131	-	-	C08396	35.601	14.686	5.897	1.163	15.563	14.868	1806.35	1709.96	1895.4	1959.27	1977.63	1829.23	4.574	18.086	10.518	0.868	5425.68	1.112	2038.26	1374.62	1754.43	1639.97	1620.47	2289.21	364.99	382.299	357.493	381.229
C18_positive	MW0063564	C24:1 Sphingomyelin	N-神经酰基-D-赤型鞘氨醇磷酸胆碱	SL	鞘脂类	SM	鞘磷脂	C47H93N2O6P	813.684	812.677	12.2214	M+H	1.33211	2	0.9193	rp	94359-13-4	44260126	HMDB0012107	-	C00550	49976.1	55225.4	58266.6	51445.4	48633.5	48514.1	57275.7	50429.4	50912.3	46830.5	30505.1	20111	76600.3	69524.8	54875.9	82245.9	70119.8	48330.6	61750.2	68413.3	56913.7	61834.1	57510.9	79121.3	33889.9	44336.1	43375.3	41682.7
C18_positive	MW0110701	20-HETE ethanolamide	20-HETE乙醇酰胺	Alcohol and amines	醇、胺类	Amines	胺类	C22H37NO3	364.287	363.277	6.3716	M+H	1.25455	2	0.7439	rp	942069-11-6	35027640	HMDB0013630	-	-	1300.31	1225.66	936.682	598.339	976.192	788.132	1527.44	4351.52	4371.51	4437.53	2929.56	2035.18	5.692	115.591	139.848	111.571	6.306	157.43	187.581	174.502	89.221	253.044	114.935	75.83	1275.34	1255.45	1066.51	1295.99
C18_positive	MW0006458	Butylparaben	4-羟基苯甲酸丁酯	Benzene and substituted derivatives	苯及其衍生物	Benzene and substituted derivatives	苯及其衍生物	C11H14O3	195.102	194.094	8.0744	M+H	0.076641	2	0.7382	rp	94-26-8	7184	HMDB0032575	-	-	70650.5	55072.7	78251.4	95231	86125.9	87815.8	80468	85318.3	65965	57568	48649.5	36687.6	96806.2	105986	92514.2	91889.9	70072.8	63107.6	64628.5	62233.4	58157.6	54355.8	76618.5	91952.6	39231.1	39568.9	40180.2	39167.1
C18_positive	MW0126309	Pyrazosulfuron-ethyl	吡嘧磺隆	Heterocyclic compounds	杂环化合物	Heterocyclic compounds	杂环化合物	C14H18N6O7S	200.041	414.096	0.6416	M+2H-CH4	0.56074	4	0.7362	rp	93697-74-6	91750	-	-	C18444	177.444	272.787	719.602	808.28	248.3	542.109	2187.55	1788.92	412.01	1878.33	698.554	1645.33	394.028	498.928	367.737	563.021	141.874	233.419	479.798	254.297	1325.63	718.474	540.569	1137.07	2188.61	2359.45	2362.18	2357.32
C18_positive	MW0117683	2-(Chloromethyl)-1,3-benzoxazole-5-sulfonamide	2-(氯甲基)-1,3-苯并恶唑-5-磺酰胺	Alcohol and amines	醇、胺类	Amines	胺类	C8H7ClN2O3S	218.952	245.987	1.7425	M+H-C2H4	1.4765	4	0.7144	rp	936074-39-4	16767386	-	-	-	3176.07	2921.14	3671.48	3612.27	3278.48	2823.21	3466.05	2248.22	3329.46	3591.58	3505.8	2656.54	3960.03	4407.13	2268.21	2683.11	3145.24	3001.68	3502.6	2662.2	3119.3	3006.56	4484.01	4950.25	3535.95	3503.49	3530.08	3399.89
C18_positive	MW0161667	N-Caffeoyl serotonin	N-咖啡酰血清素	Alcohol and amines	醇、胺类	Amines	胺类	C19H18N2O4	321.124	338.127	4.133	M+H-H2O	0.85	3	0.9826	rp	928765-97-3	16659826	-	-	-	13562.4	11097.6	12063	13236.8	12959.1	13184.6	13226.9	14609.8	14652.7	14383.6	16773.2	12735.8	13424.6	16979.2	11593.8	12302.2	13931.1	10941.4	14943.7	13088.8	14474.7	15099.3	14144	15012.5	12811.2	12781	12952.6	12546.4
C18_positive	MW0014042	cis-3-Hexen-1-ol	（E)-3-己烯-1-醇	Organic acid and Its derivatives	有机酸及其衍生物	Organic acid and Its derivatives	有机酸及其衍生物	C6H12O	123.079	100.089	10.6344	M+Na	2.67742	2	0.8491	rp	928-96-1	5281167	HMDB0030003	-	C08492	5968.41	3047.05	3879.02	6039.13	5300.89	5992.68	8287.02	7858.89	11897.5	10840.3	8004.07	7483.45	10797.2	9302.92	9794.71	5811.02	6631.47	5568.2	6102.8	6751.31	12220.6	8019.26	17231.6	15371.2	7259.81	7389.35	7669.37	7285.95
C18_positive	MW0144429	AGELASINE	-	Heterocyclic compounds	杂环化合物	Heterocyclic compounds	杂环化合物	C26H39N5	394.296	421.32	6.905	M+H-C2H4	1.29688	4	0.7186	rp	92664-80-7	11775482	-	43731	-	70.942	48.435	79.953	56.59	70.49	60.08	575.45	560.531	533.343	655.19	636.111	555.197	33.848	25.36	30.379	10.201	3.474	13.226	25.985	10.674	44.286	12.075	2.506	11.858	219.816	205.349	218.523	218.637
C18_positive	MW0108870	N-Octadecyl-N'-propyl-sulfamide	N-十八烷基-N'-丙基-磺酰胺	Alcohol and amines	醇、胺类	Amines	胺类	C21H46N2O2S	408.369	390.328	11.4753	M+NH4	13.5029	2	0.6878	rp	925891-74-3	16103197	-	64680	-	10357.1	19163.8	19587.4	12767.3	21431.5	11891.8	13752.3	18973	19140.5	14059.7	13861.3	13387.9	11629.1	24178.8	9985.1	11193.4	11825.7	9685.08	12849.3	12927.9	14685.3	14779.1	16587	16435.7	16537.5	16766.6	16668.7	15486.3
C18_positive	MW0054030	Ipomeatetrahydrofuran	番薯四氢呋喃	Aldehyde,Ketones,Esters	醛、酮、酯类	Ketones	酮类	C15H28O3	279.195	256.204	5.2952	M+Na	5.29704	3	0.6104	rp	92448-62-9	131752981	HMDB0040904	-	-	1.074	0.979	0.883	0.062	0.757	0.755	0.479	1.352	1.22	0.838	0.916	0.16	0.821	2.372	0.723	0.611	0.233	0.232	0.416	0.859	0.165	0.067	1.033	0.406	42.414	42.747	43.63	42.087
C18_positive	MW0127102	Demeton-S-methyl	内吸虫-S-甲基	Others	其他	Others	其他	C6H15O3PS2	253.013	230.02	5.6991	M+Na	9.13978	2	0.7548	rp	919-86-8	13526	-	-	C18655	67489.5	64843	67097.9	77043.8	67608.6	66826.2	66145.7	71128.1	84188.8	66951.9	5506.85	4141.29	77757.5	50116.7	23843.8	35390.2	79273.3	61480.6	81626.4	66703.3	78761.7	80478.4	79816.4	84247.5	66589.1	73300.6	70309.6	70058.5
C18_positive	MW0007975	N-(2-Aminoethyl)-4-(trifluoromethyl)benzenesulfonamide	N-(2-氨基乙基)-4-(三氟甲基)苯磺酰胺	Benzene and substituted derivatives	苯及其衍生物	Benzene and substituted derivatives	苯及其衍生物	C9H11F3N2O2S	291.041	268.049	13.1022	M+Na	1.6675	4	0.71	rp	917096-84-5	43603470	-	-	-	453.137	744.137	349.056	969.586	1367.34	1187.4	512.958	656.848	1247.79	1102.05	989.899	1078.58	885.111	1244.81	764.899	1024.05	983.659	841.01	2955.78	6739.23	1132.26	1484.48	1316.06	1076.65	1449.08	1775.77	1833.97	2006.21
C18_positive	MW0121735	6-(3,4-Dihydroisoquinolin-2(1h)-Yl)-3-Methyl-[1,2,4]triazolo[3,4-A]phthalazine	6-(3,4-二氢异喹啉-2(1h)-Yl)-3-甲基-[1,2,4]三唑并[3,4-A]酞嗪	Heterocyclic compounds	杂环化合物	Heterocyclic compounds	杂环化合物	C19H17N5	288.174	315.148	2.5678	M+H-CO	6.511	4	0.6111	rp	915926-66-8	18524077	-	-	-	26.575	13.718	15.128	2.883	16.156	42.027	31.306	11.688	6.603	21.357	13.462	13.431	24.323	20.445	1.682	25.284	4.706	7.807	17.172	12.362	31.312	25.224	1.509	19.077	71.638	74.76	66.572	71.971
C18_positive	MW0054942	methylcarbamyl PAF	甲基氨基甲酰PAF C-16	GP	甘油磷脂类	PC	磷脂酰胆碱	C26H55N2O7P	561.378	538.375	11.4298	M+Na	11.115	2	0.9006	rp	91575-58-5	124663	-	43418	-	2185.87	2181.51	3355.69	3451.41	2762.71	3160.53	1488.84	3489.18	2433.94	1917.09	2105.46	2050.63	2426.44	2659.7	2640.43	1653.45	2710.7	2398.04	2508.48	3253.28	2245.88	2583.22	2831.79	2421.68	2336.21	2414.88	2114.57	2384
C18_positive	MEDP1315	Quinoline	喹啉	Heterocyclic compounds	杂环化合物	Heterocyclic compounds	杂环化合物	C9H7N	176.073	129.058	2.4463	M+HCOO+2H	0.202672	1	0.7484	rp	91-22-5	7047	HMDB0033731	-	C06413	1545.42	1944.84	2181.59	1254.95	1339.25	3788.97	8887.34	6178.09	8529.82	5739.39	7736.81	9745.29	1341.34	1296.24	2486.64	2515.68	2612.25	2600.91	4899.34	7635.37	5957.1	5503.23	4876.23	5636.33	3206.08	3272.18	3260.34	3142.47
C18_positive	MW0006231	Diphenylmethanol	二苯甲醇	Benzene and substituted derivatives	苯及其衍生物	Benzene and substituted derivatives	苯及其衍生物	C13H12O	167.086	184.089	3.2362	M+H-H2O	2.03775	4	0.7016	rp	91-01-0	7037	-	-	-	1989.57	1556.17	1813.82	2041.38	1743.19	1649.69	2024.51	1762.61	2276.15	2046.16	1761.18	1686.58	2164.99	2098.52	1896.37	1867.66	1830.2	1604.86	2123.18	1602.09	1947.04	2243.16	2670.57	2090.31	1840.64	1828.42	1903.38	1761.57
C18_positive	MW0121042	5-[(chloroacetyl)amino]-4-cyano-N,N,3-trimethylthiophene-2-carboxamide	5-[(氯乙酰基)氨基]-4-氰基-N,N,3-三甲基噻吩-2-甲酰胺	Alcohol and amines	醇、胺类	Amines	胺类	C11H12ClN3O2S	286.043	285.034	0.5499	M+H	2.18775	4	0.6982	rp	908509-58-0	16640621	-	-	-	869.416	968.243	1068.48	749.005	1122.33	791.903	926.934	1516.71	1986.1	1231.07	1556.02	758.337	1160.69	924.875	1374.54	1956.61	1313.44	1889.52	2701.11	1906.62	2346.77	3331.05	2944	2418.8	2141.97	2249.81	2199.51	2217.6
C18_positive	MW0147474	Chymostatin	促凝乳酶	Others	其他	Others	其他	C31H41N7O6	608.324	607.312	9.288	M+H	5.42024	2	0.9164	rp	9076-44-2	443119	-	-	C11308	726.296	931.082	980.895	681.825	1339.26	1069.29	1272	1251.07	1423.69	1262.28	1296.81	786.304	1078.02	1098.55	985.027	815.721	1227.34	998.517	1436.62	531.902	2009.95	1800.52	1688.89	1655.49	1296.53	1362.28	1309.46	1238.21
C18_positive	MW0063233	Pubescenol	-	Benzene and substituted derivatives	苯及其衍生物	Benzene and substituted derivatives	苯及其衍生物	C28H42O6	457.284	474.298	8.9042	M+H-H2O	22.2502	3	0.6252	rp	90685-93-1	131750955	HMDB0030085	-	-	201963	260521	255220	312753	83443.1	113523	274593	291782	372099	193885	310275	127204	266180	203284	180209	253636	290112	239088	288162	274661	205648	306460	332901	168690	135413	129996	129421	130155
C18_positive	MW0168237	Pevikon	佩维孔	Amino acid and Its metabolites	氨基酸及其代谢物	Small Peptide	小肽	C6H9ClO2	186.993	148.029	12.9919	M+K	7.23175	4	0.5983	rp	9003-22-9 | 28431-58-5 | 106168-37-0	61927	-	-	C19546	20848.4	37895.2	26515.9	22804.1	7996.55	25441.2	21441	17599.3	27473.1	23273.7	19202.1	16227.2	22874.3	25904.7	21695.5	24863.5	7735.44	17109.1	23979.5	41917.1	26781.5	18383	22928.6	26590	21846.3	21641.7	22246.9	22002.8
C18_positive	MW0007144	Ferimzone	费里宗	Benzene and substituted derivatives	苯及其衍生物	Benzene and substituted derivatives	苯及其衍生物	C15H18N4	277.141	254.153	3.8979	M+Na	2.1335	4	0.6994	rp	89269-64-7	9013425	-	-	C18579	0.536	0.404	0.469	0.211	0.602	0.107	0.895	0.604	0.516	0.572	0.783	0.203	0.044	4.601	0.894	0.435	0.469	0.264	0.516	0.224	0.148	0.316	1.337	1.144	51.146	51.331	51.163	50.147
C18_positive	MW0015097	6-Hydroxyfluoxymesterone	6-羟基氟甲睾酮	Aldehyde,Ketones,Esters	醛、酮、酯类	Ketones	酮类	C20H29FO4	705.414	352.205	4.5004	2M+H	5.0305	4	0.8888	rp	88936-08-7	11002660	-	-	-	4776.66	3970.63	4160.16	5480.81	4236.24	4554.03	5368.65	5803.9	5481.26	4099.38	5466.57	4686.11	5454.33	6296.28	4345.66	4863.92	5106.11	3471.13	5783.54	3796.78	5949.76	5926.36	5897.9	6134.27	5172.88	5500.24	4935.82	5244.79
C18_positive	MW0003901	3'-Carbamoyl-biphenyl-3-yl-undecynecarbamate	3'-氨基甲酰基-联苯-3-基-十一烷基氨基甲酸酯	Benzene and substituted derivatives	苯及其衍生物	Benzene and substituted derivatives	苯及其衍生物	C25H30N2O3	429.216	406.226	3.2286	M+Na	10.7257	4	0.5425	rp	887264-45-1	24860363	-	45145	-	1.10131e+07	1.14455e+07	1.05012e+07	1.31439e+07	9.69729e+06	9.26021e+06	1.74599e+07	1.32596e+07	2.85792e+07	1.22486e+07	1.54395e+07	1.50977e+07	1.12734e+07	9.64732e+06	9.77754e+06	1.13123e+07	1.14198e+07	9.12491e+06	1.26359e+07	1.21323e+07	1.22084e+07	1.64899e+07	1.76123e+07	1.85777e+07	28309.5	28053.9	31430.3	33926.1
C18_positive	MW0115115	Phenethyl rutinoside	苯乙基芸香苷	Benzene and substituted derivatives	苯及其衍生物	Benzene and substituted derivatives	苯及其衍生物	C20H30O10	453.168	430.184	7.7532	M+Na	12.8578	2	0.8758	rp	88510-08-1	14312558	HMDB0032622	-	-	18428.2	27590.5	30982.9	22166.9	23982	14853.1	13019.6	19524.5	16079.7	16613	19837.5	14889.3	15169.7	20737	15242.4	15198.3	12784.9	14997.2	17397.5	17797.2	21431.6	18578.6	24426.7	19583.8	20380.9	19703.1	20036.5	20092.7
C18_positive	MW0120101	4,7-dichloro-2-(4-chlorophenyl)-1H-indole	4,7-二氯-2-(4-氯苯基)-1H-吲哚	Heterocyclic compounds	杂环化合物	Indole and Its derivatives	吲哚及其衍生物	C14H8Cl3N	317.96	294.972	12.2521	M+Na	0.581	4	0.7357	rp	881040-20-6	4714966	-	-	-	3092.93	3598.89	2381.66	2164.85	3922.59	2873.62	3290.5	3671.47	4547.46	4169.49	3980.38	3349.35	3402.42	3310.52	2709.5	2883.99	3455.06	2779.39	2800.7	3127.06	2677.13	3636.12	3921.35	3745.22	2982.14	3106.91	2952.56	2973.19
C18_positive	MW0054417	5,12-Dihydroxyicosa-6,8,10-trienoic acid	-	Amino acid and Its metabolites	氨基酸及其代谢物	Amino acids	氨基酸	C20H34O4	311.222	338.246	6.9606	M+H-C2H4	3.22575	4	0.6755	rp	88099-35-8	3906	-	43393	-	0.464	0.132	1.987	2.222	0.124	1.106	2.407	1.581	2.511	1.248	0.106	0.467	0.085	4.976	1.33	0.232	0.764	0.648	0.411	0.406	0.224	0.249	0.6	1.991	41.529	45.464	40.806	36.464
C18_positive	MW0009449	Phthalic acid	邻苯二甲酸	Organic acid and Its derivatives	有机酸及其衍生物	Organic acid and Its derivatives	有机酸及其衍生物	C8H6O4	149.023	166.027	11.8544	M+H-H2O	0.603089	2	0.9725	rp	88-99-3	1017	HMDB0002107	6489	C01606	113642	127709	217819	294093	124972	224518	135697	263080	330017	160744	277387	224385	83234.9	92381.4	85066.1	73246.8	73959.1	102634	94743.6	44624.1	66730.5	136572	92497.1	77884.2	36110.3	31791.9	34837.4	35327
C18_positive	MW0125645	N-Arachidonylmaleimide	N-花生四烯酸马来酰亚胺	Alcohol and amines	醇、胺类	Amines	胺类	C24H35NO2	387.311	369.267	10.6453	M+H+NH3	10.5513	4	0.795	rp	876305-42-9	25021164	-	45064	-	6343.76	5278.31	7596.66	8370.75	6961.87	7425.95	12024.8	12173.3	12700.7	10649.1	9001.68	8805.04	7587.07	9585.33	6107.58	7337.18	7497.14	5177.24	9790.78	8014.09	7729.15	10118.2	12355.2	11827.7	6873.73	6433.93	6728.33	6675.93
C18_positive	MW0146619	(2R,4S)-2-{(R)-carboxy[(phenylacetyl)amino]methyl}-5,5-dimethyl-1,3-thiazolidine-4-carboxylic acid	(2R,4S)-2-{(R)-羧基[(苯乙酰基)氨基]甲基}-5,5-二甲基-1,3-噻唑烷-4-羧酸	Organic acid and Its derivatives	有机酸及其衍生物	Organic acid and Its derivatives	有机酸及其衍生物	C16H20N2O5S	375.098	352.109	9.6796	M+Na	0.975	3	0.5706	rp	87492-68-0	445702	-	-	-	118066	119.174	104723	148.955	86.703	216.92	111295	120724	131236	128.514	196.047	116514	126666	138805	113180	112371	117347	68.134	69.93	123407	73.004	195.543	109345	117750	33295.5	31377.5	33308.6	31624.1
C18_positive	MW0139036	Myricatin	杨梅素	Heterocyclic compounds	杂环化合物	Heterocyclic compounds	杂环化合物	C22H16O15S	575.017	552.021	0.611	M+Na	14.5088	4	0.7421	rp	87388-96-3	73829914	HMDB0029513	-	-	4763.29	4532.3	4012.79	4126.81	6609.3	5945.73	3987.72	6713.89	13611	5321.85	8823.27	4828.48	3591.89	4121.72	6963.95	5102.33	12032.8	18953.3	13169.7	18751.5	6733.42	8834.7	7165.64	7941.35	8040.27	8179.86	8237.65	8137.59
C18_positive	MW0106072	Butanoic acid, 4-((1,2-dioxohexadecyl)amino)-, ethyl ester	丁酸，4-((1,2-二氧十六烷基)氨基)-乙酯	Organic acid and Its derivatives	有机酸及其衍生物	Organic acid and Its derivatives	有机酸及其衍生物	C22H41NO4	384.309	383.304	5.9132	M+H	2.66567	2	0.9045	rp	873079-69-7	15950454	-	64840	-	1867.99	1661.45	2336.92	2608.38	2024.02	2431.24	1680.62	3935.5	2992.76	2429.01	2311.27	2227.96	1813.71	2837.76	2513.5	1876.27	1987.69	1753.88	3255.99	2705.8	2203.31	2714.8	2376.11	2772.84	2702.6	2686.91	2681.36	2740.19
C18_positive	MW0169545	N-[(3S)-Tetrahydro-2-oxo-3-furanyl]hexadecanamide	N-[(3S)-Tetrahydro-2-oxo-3-furanyl]hexadecanamide	Amino acid and Its metabolites	氨基酸及其代谢物	Amino acid derivatives	氨基酸衍生物	C20H37NO3	340.283	339.277	5.8825	M+H	6.14157	2	0.9302	rp	87206-01-7	11609787	-	45449	-	3384.44	3065.79	3420.65	3532.89	3811.82	4064.17	4848.02	6882.46	5965.45	4525.58	5731.67	4701.94	3510.83	3815.99	4115.71	3037.99	3131.85	2650.44	5261.58	4248.52	4361.1	4506.77	3879.76	4880.49	4748.05	4636.42	4512.9	4858.56
C18_positive	MW0124410	Indoleacetic acid	吲哚-3-乙酸	Organic acid and Its derivatives	有机酸及其衍生物	Organic acid and Its derivatives	有机酸及其衍生物	C10H9NO2	244.059	175.063	4.133	M+Na+HCOOH	1.45	3	0.998	rp	87-51-4	802	HMDB0000197	-	C00954	2204.25	2138.55	2328.89	2565.94	2397.4	2466.41	2351.05	2446.5	3072.04	2482.17	2836.66	2472.28	2133.43	2843.14	1947.76	2141.8	2267.97	1897.89	2766.91	2614.35	2615.33	2893.46	2486.33	2718.67	2179.55	2175.34	2131.75	2177.6
C18_positive	MW0007397	Isoamyl salicylate	水杨酸异戊酯	Benzene and substituted derivatives	苯及其衍生物	Benzene and substituted derivatives	苯及其衍生物	C12H16O3	165.128	208.11	4.2277	M+H-CO2	0.13875	4	0.7465	rp	87-20-7	6874	HMDB0040225	-	-	172534	34.638	69.6	47.528	174909	50.036	20.723	343.389	196646	181043	19.475	36.364	187994	4308.05	168203	168004	175420	163359	191735	180145	180460	176055	163504	112.976	32424.7	32371.9	31218.9	33033.7
C18_positive	MW0009001	N-Cyclopropyl-11-(2-hexyl-5-hydroxyphenoxy)undecanamide	N-环丙基-11-(2-己基-5-羟基苯氧基)十一酰胺	Benzene and substituted derivatives	苯及其衍生物	Phenolics	苯酚类	C26H43NO3	502.293	417.324	8.2001	M+K+HCOOH	1.43082	2	0.8936	rp	869376-90-9	11495398	-	45214	-	39142.3	48277.1	38072.1	40199.8	47592.7	46357.2	36564.4	59963.4	44762.1	46445.5	34226.7	36312.5	33750.8	36818.2	35854.6	56273	38474.6	44963.2	39121.9	48238.8	61530.5	42443.6	35798.2	36091.4	42649.4	43020.1	42510	42119.2
C18_positive	MW0107564	Ile-gly	非法	Amino acid and Its metabolites	氨基酸及其代谢物	Small Peptide	小肽	C8H16N2O3	189.123	188.116	1.5004	M+H	0.225	3	0.8231	rp	868-28-0	6992869	HMDB0028907	65068	-	4.968	3.999	28.154	3.175	24.074	41.689	28.12	3.113	34.336	32.347	36.532	15.934	10.657	18.022	16.29	11.01	18.721	93.435	17.115	29.117	1.815	8.066	24.489	5.343	1617.99	1680.17	1656.58	1569.05
C18_positive	MW0012936	1-Oleoyl-2-acetyl-sn-glycerol	1-油酰基-2-乙酰基-sn-甘油	GL	甘油脂类	DG	甘油二酯	C23H42O5	399.308	398.303	10.9142	M+H	3.20002	2	0.9581	rp	86390-77-4 | 92282-11-6	6437055	-	424	-	14851.5	15504.8	15091.2	18652.7	17603.4	16983.7	24773.6	32293.5	32871.8	25950.6	23896.9	21503.9	19207.9	21326.6	15353.7	16633.4	17852.2	14635.9	21443.8	23923	23894.5	24471.8	27870.6	28548.5	20213.3	19403.9	19654.2	19398.4
C18_positive	MW0054645	Mactraxanthin	Mactraxanthin	Aldehyde,Ketones,Esters	醛、酮、酯类	Esters	酯类	C40H60O6	619.439	636.439	10.7782	M+H-H2O	7.16835	3	0.6244	rp	86105-69-3	102158275	HMDB0036928	-	-	29388.6	26811.7	26995.5	34479.5	31197.8	31567.6	35101.1	45566.4	42182.4	38692.1	38800.9	31264.6	32188.6	37735.4	28185.4	30608.3	32522.7	27586.6	33821.8	33255.3	36412.3	37895.9	37186.2	38758.5	34513.2	34428.7	34707.3	34245.2
C18_positive	MW0142509	2-n-Undecyltetrahydrothiophene	2-正十一烷基四氢噻吩	Heterocyclic compounds	杂环化合物	Heterocyclic compounds	杂环化合物	C15H30S	133.101	242.207	6.0787	M+H+Na	0.4455	4	0.739	rp	85438-98-8	134998	-	-	-	60.199	70.15	45.52	32.848	60.858	41.469	12.633	29.52	31.1	21.86	23.014	26.979	46.393	82.06	61.552	21.082	58.928	44.869	48.941	38.586	43.481	75.884	48.595	26.488	230.898	224.463	230.318	236.427
C18_positive	FDATP01995	Rilmenidine phosphate	Rilmenidine Phosphate	Others	其他	Medicine	药物	C10H19N2O5P	265.086	278.103	1.3945	M+H-CH2	0.397	4	0.7402	rp	85409-38-7	198614	-	-	-	24.7	38.513	20.797	4.615	14.766	47.958	20.235	47.057	1.35	13.88	40.783	11.208	2.335	6.345	4.862	24.972	19.3	16.876	42.237	12.516	85.653	5.002	16.592	14.39	130.28	127.012	146.417	78.38
C18_positive	FDATN00926	Dasatinib hydrochloride	Dasatinib hydrochloride	Others	其他	Medicine	药物	C22H27Cl2N7O2S	562.094	523.132	0.8403	M+K	2.67505	4	0.9374	rp	854001-07-3	11466607	-	-	-	450172	419595	402732	477647	424795	423555	1952.29	430028	468512	3123.3	438354	1008.16	459867	542521	476124	420392	473872	411797	795.474	429199	429919	420348	389550	1427.37	33641.5	33583.8	31192.4	33469.7
C18_positive	MW0123479	Cysmethynil	氯氰菊酯	Heterocyclic compounds	杂环化合物	Heterocyclic compounds	杂环化合物	C25H32N2O	394.296	376.252	7.3387	M+H+NH3	3.8405	4	0.6626	rp	851636-83-4	6918831	-	-	-	50.765	64.294	101.08	62.366	65.511	95.694	622.45	552.452	685.67	669.016	587.747	606.412	17.896	18.376	1.825	10.757	23.697	8.26	29.659	22.273	15	19.647	17.719	13.993	292.903	276.531	292.334	287.191
C18_positive	MW0134468	5'-Fluoro-2'-hydroxy-4-methylchalcone	5'-氟-2'-羟基-4-甲基查尔酮	Aldehyde,Ketones,Esters	醛、酮、酯类	Ketones	酮类	C16H13FO2	239.089	256.09	12.2521	M+H-H2O	5.10525	4	0.6374	rp	850799-77-8	5708970	-	-	-	2214.19	2025.4	1713.28	2254.51	1777.5	2030.43	1905.96	1782.12	2290.48	4111.53	2638.07	2337.74	1416.31	2360.25	2266.26	2063.31	1837.64	2136.18	2573.21	2581.39	2579.51	2793.33	3115.28	2922.69	2371.29	2217.85	2013.91	2235.11
C18_positive	MEDP1904	LPE(18:2/0:0)	LPE(18:2/0:0)	GP	甘油磷脂类	LPE	溶血磷脂酰乙醇胺	C23H44NO7P	478.294	477.286	8.154	M+H	0.322136	1	0.8932	rp	85046-18-0	52925130	HMDB0011507	-	-	3345.88	3880.94	7430.35	3639.83	9633.36	4037.22	18444	22367.9	19639.2	18085.8	16162	39770.7	1832.38	2574.94	2124.93	2678.58	2354.75	9155.9	2638.37	11488.1	2514.61	2897.55	2203.55	2525.01	5724.51	5928.3	5833.82	5842.55
C18_positive	MW0169728	Pyridoxamine	吡哆胺	Heterocyclic compounds	杂环化合物	Heterocyclic compounds	杂环化合物	C8H12N2O2	151.091	168.09	2.4866	M+H-H2O	10.4763	1	0.5145	rp	85-87-0	1052	HMDB0001431	238	C00534	6591.56	5719.87	5669.73	6804.07	5784.49	5970.66	5511.25	6629.18	6879.41	6007.65	5784.49	6207.8	7107.78	8105.47	6456.2	5971.99	6361.61	4814.17	7534.92	6400.38	6929.94	7734.85	8006.66	7164.04	6303.7	6219.41	6187.36	6083.63
C18_positive	MW0159921	[(2R,3S,4R,5R)-5-(2-amino-6-oxo-3H-purin-9-yl)-3,4-dihydroxyoxolan-2-yl]methyl dihydrogen phosphate	[(2R,3S,4R,5R)-5-(2-amino-6-oxo-3H-purin-9-yl)-3,4-dihydroxyoxolan-2-yl]甲基磷酸二氢盐	Others	其他	Others	其他	C10H14N5O8P	410.072	363.058	0.8383	M+HCOO+2H	2.07281	3	0.9769	rp	85-32-5	6804	HMDB0001397	6216	C00144	2186.04	1951.41	2274	2001.76	1502.53	1376.53	620.202	487.18	212.23	623.596	327.789	457.715	2345.39	2815.4	649.215	991.06	2507.77	1331.53	182.094	167.882	281.245	76.038	158.139	340.931	1149.53	1200.04	1101.85	1130.47
C18_positive	MW0160545	1-O-Palmityl-2-palmitoyl-rac-glycero-3-phosphocholine	1-O-Palmityl-2-palmitoyl-rac-glycero-3-phosphocholine	GP	甘油磷脂类	PC	磷脂酰胆碱	C40H83NO7P+	776.575	720.591	12.1902	M+K+NH3	9.32063	4	0.8137	rp	84743-00-0	4649135	-	-	-	15384	18606.5	17994.4	23105.3	7669.48	9125.9	10605.8	3490.12	4309.27	4303.18	14367.6	18512.8	14167.5	4037.66	4047.59	7739.2	12901.5	17845.4	14457.7	12211.9	6362.61	8304.85	6828.06	12202.2	8492.61	8058.93	8755.91	7907.35
C18_positive	MW0013609	2-Octenyl butyrate	2-辛烯基丁酸酯	Organic acid and Its derivatives	有机酸及其衍生物	Organic acid and Its derivatives	有机酸及其衍生物	C12H22O2	199.169	198.162	12.5574	M+H	1.64617	3	0.5348	rp	84642-60-4	124355627	HMDB0038081	-	-	15702.1	16012.1	13315.6	8497.53	18801	5280.69	15924.7	15619.6	17590.6	17436.9	14849.9	16643.9	17417.5	14428.5	14278	12442.7	13027.3	13368	15711.9	14612.9	18397.3	17467.8	17175.5	15794.8	15753.1	16095.6	15358.3	15554
C18_positive	MW0112945	fluorobenzoylpropionic acid	氟苯甲酰基丙酸	Organic acid and Its derivatives	有机酸及其衍生物	Organic acid and Its derivatives	有机酸及其衍生物	C10H8F2O3	215.048	214.044	1.9736	M+H	8.68152	2	0.6696	rp	84313-94-0	2758337	HMDB0060951	-	-	226.548	8.872	6.349	232.966	11.312	11.318	27.797	1.547	70.59	68.516	7.748	235.501	3.609	9.414	276.842	4.036	343.477	51.552	368.154	75.399	11.414	9.018	3.349	61.749	383.383	410.273	391.426	378.732
C18_positive	MEDL01942	Dibutyl phthalate	邻苯二甲酸二丁酯	Benzene and substituted derivatives	苯及其衍生物	Benzene and substituted derivatives	苯及其衍生物	C16H22O4	279.16	278.152	9.7149	M+H	0.983486	1	0.9778	rp	84-74-2	3026	HMDB0033244	-	C14214	1.35539e+06	1.26637e+06	1.30013e+06	1.49518e+06	1.37332e+06	1.33529e+06	1.52135e+06	1.68715e+06	1.92185e+06	1.72829e+06	1.54466e+06	1.37012e+06	1.57503e+06	1.70221e+06	1.20287e+06	1.2591e+06	1.32853e+06	1.19518e+06	1.52793e+06	1.48943e+06	1.56051e+06	1.55625e+06	1.72761e+06	1.65352e+06	1.40393e+06	1.38695e+06	1.38913e+06	1.36111e+06
C18_positive	MW0004446	4,4'-Methylenebis(2-methylaniline)	4,4'-亚甲基双(2-甲基苯胺)	Benzene and substituted derivatives	苯及其衍生物	Benzene and substituted derivatives	苯及其衍生物	C15H18N2	227.164	226.147	4.9154	M+H	22.7052	2	0.6285	rp	838-88-0	13283	-	-	C19260	0.12	0.132	0.151	0.282	0.219	0.414	0.287	0.111	0.184	0.104	0.133	0.018	0.1	7.927	0.039	0.196	0.126	0.038	0.11	0.083	0.157	0.008	0.468	1.218	54.311	55.27	54.896	54.528
C18_positive	MW0007147	Fexofenadine	非索非那定	Heterocyclic compounds	杂环化合物	Heterocyclic compounds	杂环化合物	C32H39NO4	502.291	501.288	8.9656	M+H	7.99002	2	0.9069	rp	83799-24-0 | 138452-21-8	3348	HMDB0005030	2766	C06999	1178.88	1063.55	1092.12	1251.56	1220.54	1433.44	6903.67	5201.11	4643.08	4776.17	3577.96	3716.62	998.764	1073.97	1031.27	1304.6	1936.17	3037.34	5062.39	4425.62	2800.51	3032.2	3769.28	3633.86	4790.82	4367.04	4670.23	4877.61
C18_positive	MW0054320	Leukotriene B4 dimethylamide	白三烯 B4 二甲基酰胺	FA	脂肪酰类	Oxidized lipids	氧化脂质	C22H37NO3	346.275	363.277	5.7451	M+H-H2O	3.17966	2	0.9266	rp	83024-92-4	5283126	HMDB0005085	-	-	6108.66	5397.44	5999.36	6329.81	5177.53	5631.86	43329.7	49885.6	47473.3	49417.2	45423.4	48392.8	174.3	531.567	1369.65	58.144	1266.18	494.065	3.037	35902.8	10.631	22.848	32713.9	35163.1	15497.4	15453.3	15542.9	15461.6
C18_positive	MW0169786	Rotenone	鱼藤酮	Heterocyclic compounds	杂环化合物	Heterocyclic compounds	杂环化合物	C23H22O6	463.131	394.142	10.7482	M+Na+HCOOH	13.0078	2	0.6211	rp	83-79-4	6758	HMDB0034436	-	C07593	6.429	1.165	4.23	4.037	0.232	3.001	9.326	5.266	2.337	0.617	1.359	5.505	1.636	32.635	0.111	0.309	7.223	7.179	5.224	6.541	0.252	7.598	7.405	1.968	396.046	386.827	381.914	388.102
C18_positive	MW0049216	Deoxycholic acid	脱氧胆酸	Bile acids	胆汁酸	Bile acids	胆汁酸	C24H40O4	785.588	392.293	8.3536	2M+H	2.2863	2	0.7496	rp	83-44-3	222528	HMDB0000626	265	C04483	12158.2	37859.4	5514.31	11215	9509.88	6440.53	7452.37	13320.4	9896.93	9963.01	9501.7	8114.17	36714.7	41810.6	31269.4	94462.4	39387.1	13248.8	32478.7	18671.4	19091.6	66845.1	28928.7	9257.69	40041.9	35336.4	40777.7	41095.2
C18_positive	MW0132598	3',4'-Dimethoxy-2'-hydroxychalcone	（2E)-1-(2-羟基-3，4-二甲氧基苯基)-3-苯基丙-2-烯-1-酮	Aldehyde,Ketones,Esters	醛、酮、酯类	Ketones	酮类	C17H16O4	331.118	284.105	5.7298	M+HCOO+2H	2.25214	2	0.721	rp	82964-34-9 | 7478-65-1	5385206	HMDB0133973	-	-	18356	16024.3	17215.7	23553.5	16918.6	18716.3	20101.7	18175.7	23219.1	19721.4	18805.6	18664.7	24089.9	27504.7	18769.7	18554.1	18598.9	17772.8	22199.9	17915.2	24372.8	22263.8	26094.2	25283.3	17840.2	18640.3	17714.3	18402.8
C18_positive	MW0109079	Perindopril	培哚普利	Heterocyclic compounds	杂环化合物	Heterocyclic compounds	杂环化合物	C19H32N2O5	407.191	368.231	5.7298	M+K	0.30575	4	0.7424	rp	82834-16-0	107807	HMDB0014928	-	C07706	3050.49	2390.19	1620.42	3643.01	2205.74	3177.89	2693.79	2902.33	3103.84	2876.37	3085.57	2633.82	4123.23	4342.04	2673.84	3090.61	3009.42	2491.62	3640.76	2554.2	3330.44	3440.59	3813.61	3867.79	2334.6	2720.94	2534.42	2609.75
C18_positive	MW0006357	Bifenthrin	联苯菊酯	Benzene and substituted derivatives	苯及其衍生物	Benzene and substituted derivatives	苯及其衍生物	C23H22ClF3O2	445.12	422.126	11.7568	M+Na	8.88515	2	0.688	rp	82657-04-3	5281872	-	-	-	2891.57	4994.46	3059.66	4420.36	3272.76	3539.12	2567.65	2857.47	4064.6	2308.42	3377.86	2468.39	1227.87	3757.68	1351.19	2909.47	5706.82	4772	2590.83	3946.16	4103.4	6520.78	3499.49	6168.34	10389.5	10660	10994.7	10954.9
C18_positive	MW0013368	28-Homobrassinolide	28-高油菜素内酯	Aldehyde,Ketones,Esters	醛、酮、酯类	Esters	酯类	C29H50O6	495.373	494.361	7.8442	M+H	8.78665	3	0.8222	rp	82373-95-3 | 74174-44-0	11038340	HMDB0030423	-	-	99965.7	84182.2	83471.3	101015	93302.9	82511.5	90344.5	84215.5	102351	91550.8	87382.8	84594.6	94023.9	115303	86788.5	80987.7	96629.1	86136.7	94524.6	88965.5	98335.8	98644	95451.3	97519.4	85141.2	85804.7	84853.1	83931.5
C18_positive	MEDN0604	Tetradecanedioic acid	十四烷二酸	FA	脂肪酰类	FFA	游离脂肪酸	C14H26O4	223.17	258.183	7.0583	M+H-2H2O	1.33125	2	0.5608	rp	821-38-5	13185	HMDB0000872	5833	-	1.633	0.758	0.28	1.443	1.678	2.06	3.661	1.515	1.409	1.086	1.354	2.591	2.147	9.947	1.295	0.362	0.527	1.346	1.967	1.797	1.219	1.892	3.017	2.31	107.431	109.615	112.362	107.261
C18_positive	MW0005881	8-Anilino-1-naphthalenesulfonic acid	8-苯胺-1-萘磺酸	Benzene and substituted derivatives	苯及其衍生物	Benzene and substituted derivatives	苯及其衍生物	C16H13NO3S	282.052	299.062	8.4442	M+H-H2O	15.7577	2	0.7424	rp	82-76-8	1369	HMDB0061854	-	C11326	363.519	301.563	539.032	607.821	308.868	391.801	662.855	445.966	543.445	408.964	367.973	396.371	505.345	1521.92	337.838	301.432	402.695	360.131	386.99	334.551	380.859	426.868	960.241	676.103	6975.45	6943.43	7012.94	6876.63
C18_positive	MW0126952	Visnagin	维斯纳金	Heterocyclic compounds	杂环化合物	Heterocyclic compounds	杂环化合物	C13H10O4	294.077	230.058	1.4096	M+CH3CN+Na	5.46687	2	0.6961	rp	82-57-5	6716	-	-	C09049	1364.45	1502.25	1919.41	2054.78	859.677	1108.01	1307.51	1118.15	1287.55	1116.01	1295.03	1411.26	1931.78	2697.62	866.959	916.774	1076.09	1220.36	1193.2	851.841	1043.64	1026.19	2306.48	1758.67	3617.85	3679.38	3763.06	3653.08
C18_positive	MW0005717	1-Anthracenesulfonic acid, 9,10-dihydro-5-nitro-9,10-dioxo-	1-蒽磺酸，9,10-dihydro-5-nitro-9,10-dioxo-	Benzene and substituted derivatives	苯及其衍生物	Benzene and substituted derivatives	苯及其衍生物	C14H7NO7S	315.974	332.994	0.5499	M+H-H2O	23.306	4	0.6559	rp	82-50-8	6714	-	-	-	4708.45	7821.23	5114.2	8263.89	7577.24	5983.86	7542.35	4332.95	8503.87	8906.18	7783.41	6910.17	6325.25	7557.15	7212.59	6993.66	6863.31	7833.54	11016.4	9580.75	14149	10231.6	11877.8	10814.9	8211.34	8242.28	8095.05	8295.93
C18_positive	MW0124616	[(1S,4S,12S,13R,16R,17R)-17-hydroxy-12-methyl-8-oxapentacyclo[14.2.1.01,13.04,12.05,9]nonadeca-5(9),6,10-trien-17-yl]methyl hexadecanoate	[(1S,4S,12S,13R,16R,17R)-17-hydroxy-12-methyl-8-oxapentacyclo[14.2.1.01,13.04,12.05,9]nonadeca-5(9),6,10-trien- 17-基]甲基十六烷酸酯	Heterocyclic compounds	杂环化合物	Heterocyclic compounds	杂环化合物	C36H56O4	553.432	552.418	10.8385	M+H	11.1137	4	0.5368	rp	81760-45-4	101046637	-	-	-	1719.16	1311.22	1297.85	1609.08	1894.16	2271.49	1852.58	3177.79	2617.09	3002.54	2306.21	1353.85	1978.49	1669.06	2493.87	1936.73	1735.12	1373.49	1728.58	1501.52	2363.81	1919.97	2435.94	2055.7	1712.62	1763.02	1689.07	1752.3
C18_positive	MW0107787	Leucine enkephalin acetate salt	亮氨酸脑啡肽醋酸盐	Amino acid and Its metabolites	氨基酸及其代谢物	Small Peptide	小肽	C30H41N5O9	654.245	615.29	5.2124	M+K	16.9485	4	0.7143	rp	81678-16-2	90477426	-	24069	-	21695	18483.6	20451.7	22071.2	16848.1	19406.1	18299.8	11568.9	22367.9	19337.2	19625.5	20514.5	10811.7	17047.5	10722.6	10238.4	11597.2	15621.5	15775.8	19192.6	14710	14375.3	14557.2	15039.1	15074.9	16631.8	14974.8	15026.5
C18_positive	MW0126871	Tridemorph	三甲型	Heterocyclic compounds	杂环化合物	Heterocyclic compounds	杂环化合物	C19H39NO	298.311	297.303	6.806	M+H	2.25822	2	0.9286	rp	81412-43-3	32518	HMDB0031810	-	C11285	210823	198686	169281	190182	158934	187329	888593	872060	935583	953419	876121	882540	153679	2.372	109966	103820	162499	119859	9.4	23.564	262096	217706	618404	258705	159968	165012	164855	162139
C18_positive	MW0119243	3,5-dimethyl-4-propyl-1H-pyrazole	3,5-二甲基-4-丙基-1H-吡唑	Heterocyclic compounds	杂环化合物	Heterocyclic compounds	杂环化合物	C8H14N2	161.096	138.116	7.181	M+Na	6.74625	4	0.6068	rp	81328-51-0	12933275	-	-	-	2642.74	3658.59	2039.9	2489.05	2531.37	3142.06	2298.41	3629.97	2859.45	2195.57	2462.25	2339.01	2582.13	2719.55	2518.87	3057.68	2677.35	2481.73	2628.46	2618.38	2245.76	2598.83	2684.51	3019.33	2820.59	2943.68	2920.6	2947.83
C18_positive	MW0061079	5,6-Epoxy-5,6-dihydro-12'-apo-b-carotene-3,12'-diol	-	Terpenoids	萜类	Ditepenoids	二萜	C25H36O3	385.275	384.266	8.1847	M+H	3.613	4	0.6674	rp	80952-82-5	131751641	HMDB0034952	-	-	1521.63	1625.29	1613.25	878.608	1808.88	1344.88	772.027	1542.83	925.79	1264.59	919.672	733.612	2471.21	3069.43	2048.25	3013.55	1715.59	2184.08	604.244	996.143	899.335	905.629	588.588	473.026	1492.91	1516.33	1597.49	1343.42
C18_positive	MW0107123	Roxadustat	罗沙司他	Benzene and substituted derivatives	苯及其衍生物	Benzene and substituted derivatives	苯及其衍生物	C19H16N2O5	375.098	352.106	11.7568	M+Na	8.22948	2	0.6754	rp	808118-40-3	11256664	-	-	-	2.248	1.376	2.592	1.826	1.332	2.434	4.101	3.134	1.441	0.597	0.746	0.351	0.644	6.591	0.361	0.9	1.163	2.053	0.731	0.613	0.231	2.576	2.505	4.864	111.94	111.049	107.154	109.595
C18_positive	MW0138813	Loxoprofen	洛索洛芬	Heterocyclic compounds	杂环化合物	Heterocyclic compounds	杂环化合物	C15H18O3	219.135	246.126	0.823	M+H-CO	3.98625	4	0.6596	rp	80382-23-6	3965	HMDB0041920	-	-	4.734	11.467	6.063	7.232	3.913	4.56	8.899	2.939	4.087	4.692	1.932	3.9	18.723	8.471	1.624	9.976	4.921	6.56	1.68	4.53	6.462	11.53	10.251	8.28	213.273	227.551	235.064	226.253
C18_positive	MW0123005	Azelastine hydrochloride	盐酸氮卓斯汀	Others	其他	Medicine	药物	C22H25Cl2N3O	440.118	417.137	4.133	M+Na	10.7112	4	0.5427	rp	79307-93-0 | 37932-96-0	54360	-	-	C76537	17904.8	14774	15658.6	18031.5	16244	16988.1	16872.4	16924.2	19038.6	18488.9	18525.8	15882.4	17030.7	20039.5	14860.4	16967.3	18094.9	14873.1	19732.5	16201.5	17980.3	18274.5	16295.4	19301.3	16879.4	17465.5	16861	16308.6
C18_positive	MW0112736	3,6-Dimethyl-4-octyne-3,6-diol	3,6-二甲基-4-辛炔-3,6-二醇	Alcohol and amines	醇、胺类	Alcohols	醇类	C10H18O2	153.127	170.131	5.5006	M+H-H2O	3.30025	4	0.9239	rp	78-66-0	6546	-	-	-	121.901	108.629	130.542	172.749	109.544	148.362	212.453	167.062	132.617	109.072	109.929	154.972	94.834	520.383	88.405	88.234	97.358	81.563	89.747	84.203	131.419	138.732	212.789	201.34	3167.73	3199.12	3157.6	3177.48
C18_positive	MEDP0827	3,5,5-Trimethyl-2-cyclohexen-1-one	异佛尔酮	Aldehyde,Ketones,Esters	醛、酮、酯类	Ketones	酮类	C9H14O	139.112	138.105	5.9439	M+H	0.708341	1	0.8399	rp	78-59-1	6544	HMDB0031195	-	C14743	22648.3	20345.8	21733.1	23768.5	20221.2	17994.2	19623.1	21422.7	23435.6	22335.8	20464.9	20959.4	22772.6	27923.1	17729.8	18171.6	20509.4	18915.9	20674.4	20313.2	21750.3	22950.4	24708.9	22402.1	44992	44858.6	45244.9	44600.5
C18_positive	MW0123716	Dinaciclib	丁那西利布	Heterocyclic compounds	杂环化合物	Heterocyclic compounds	杂环化合物	C21H28N6O2	397.228	396.227	5.9895	M+H	14.2801	2	0.802	rp	779353-01-4	46926350	-	-	-	5175.97	4825.93	4744.86	5880.48	4937.17	5298.39	4771.91	4363.21	5698.14	4832.36	4608.52	4323.78	6519.66	6526.97	5106.28	4931.67	3430.64	4312.44	6475.7	5145.08	6250.06	6590.54	6292.03	6428.98	5063.5	4878.17	5187.33	5035.38
C18_positive	MW0054042	Isoamyl 2-furonpropionate	2-呋喃丙酸异戊酯	Aldehyde,Ketones,Esters	醛、酮、酯类	Esters	酯类	C12H18O3	211.133	210.126	5.2835	M+H	3.51375	4	0.6694	rp	7779-67-1	538506	HMDB0037735	-	-	1.634	1.974	1.097	1.878	0.688	1.058	1.561	1.399	1.248	2.146	1.129	1.375	1.66	13.711	0.074	1.082	0.599	0.264	0.872	1.273	1.052	1.823	0.513	0.787	71.565	73.045	71.548	70.849
C18_positive	MW0004948	4-ethyl-N-(4H-1,2,4-triazol-4-yl)benzamide	4-乙基-N-(4H-1,2,4-三唑-4-基)苯甲酰胺	Benzene and substituted derivatives	苯及其衍生物	Benzene and substituted derivatives	苯及其衍生物	C11H12N4O	109.064	216.101	4.7308	M+2H	12.2222	4	0.5214	rp	777874-30-3	2225294	-	-	-	1.705	1.134	0.852	1.687	0.728	0.996	0.169	2.18	1.426	1.079	0.967	0.483	1.302	8.581	0.837	1.06	1.962	0.752	2.338	1.385	1.824	1.489	1.421	1.287	69.205	69.127	69.263	68.841
C18_positive	MW0003626	3,4-Dihydroxymandelic acid	3,4-二羟基扁桃酸	Benzene and substituted derivatives	苯及其衍生物	Phenolics	苯酚类	C8H8O5	149.024	184.037	9.7149	M+H-2H2O	0.908746	2	0.9533	rp	775-01-9	85782	HMDB0001866	696	C05580	2.03697e+06	1.94693e+06	1.94434e+06	2.24744e+06	2.14226e+06	2.12421e+06	2.31369e+06	2.533e+06	2.84471e+06	2.56322e+06	2.30661e+06	2.08915e+06	2.43107e+06	2.56274e+06	1.86382e+06	1.89149e+06	2.05299e+06	1.8366e+06	2.32743e+06	2.02746e+06	2.31714e+06	2.40817e+06	2.59951e+06	2.48085e+06	2.22633e+06	2.22788e+06	2.19547e+06	2.18612e+06
C18_positive	MW0160053	1,16-Hexadecanediol	1,16-十六烷二醇	Alcohol and amines	醇、胺类	Alcohols	醇类	C16H34O2	281.248	258.256	9.4406	M+Na	2.79875	4	0.6847	rp	7735-42-4 | 23079-20-1	82184	-	-	-	2571.96	2504.47	2095.94	2908.43	2199.13	3057.2	5403.84	5199.44	5770.5	4863.26	4747.12	4685.93	3860.07	2846.56	1407.36	3486.4	2696.43	3007.31	2511.23	2407.28	2716.11	4486.73	3366.82	1846.87	3200.22	2992.01	3108.5	3252.39
C18_positive	MW0053902	1-O-Hexadecyl-2-acetyl-sn-glycerol	十六烷基乙酰甘油	GL	甘油脂类	DG	甘油二酯	C21H42O4	359.316	358.308	12.1564	M+H	0.970355	2	0.8889	rp	77133-35-8	11024766	-	43452	-	17251.3	15812.7	13679.8	17644.9	16379	13090.8	14349.9	18405.1	21124	18310	17566.2	15963.2	8988.67	14950.2	10878	12823.9	15870.5	14940.9	12622.8	19320.2	9821.57	12740.4	10096.6	11664.8	10609.6	10608.8	10678	10441.8
C18_positive	MW0015722	alpha-Santalyl phenylacetate	α-檀香苯乙酸酯	Aldehyde,Ketones,Esters	醛、酮、酯类	Esters	酯类	C23H30O2	361.209	338.225	2.2794	M+Na	6.45075	4	0.6122	rp	77-88-3	71586752	HMDB0037210	-	-	3.267	2.532	0.959	0.657	0.869	1.308	1.9	0.427	1.823	1.017	0.935	1.432	1.457	0.296	0.815	1.971	0.67	0.8	0.472	0.795	1.754	0.654	2.745	0.615	35.496	36.097	36.776	36.392
C18_positive	MW0106413	Dicyclomine	双环胺	Others	其他	Others	其他	C19H35NO2	332.259	309.267	5.6227	M+Na	5.70331	2	0.8327	rp	77-19-0	3042	HMDB0014942	-	C06951	8926.56	8686.66	8327.67	10028.4	8558.83	9059.5	113824	69465.9	70833.2	71153.5	68043.2	67598.3	37.23	19.097	29810.1	29774.9	6.618	28951.7	7.689	10.626	31982.4	31201.7	7.038	31200.1	31298.1	32091	33059.6	34070.5
C18_positive	MW0000166	Camptothecin	喜树碱	Others	其他	Others	其他	C20H16N2O4	349.119	348.111	4.133	M+H	2.63276	2	0.8578	rp	7689-03-4 | 251316-95-7	24360	-	3491	C01897	57282.9	48660.4	51811.9	60687.7	54166	57650.5	56454.5	58156	62227.1	61274.7	64619.5	54276.5	58940	65976.9	49253.3	53769.8	57777.5	48453.2	64418.7	53774.8	59356.2	62742.2	61054.6	62973.7	53746	53364.6	54333.9	52506.6
C18_positive	MW0007422	Isoproterenol	盐酸异丙肾上腺素	Hormones and hormone related compounds	激素及激素相关物质	Hormones and hormone related compounds	激素及激素相关物质	C11H17NO3	194.118	211.121	0.4654	M+H-H2O	0.0518473	1	0.7482	rp	7683-59-2	3779	HMDB0015197	-	C07056	8730.78	8763.64	8276.45	9375.75	9968.3	10186.2	10553.6	567.71	11487.1	9320.21	9226.99	8818.25	9781.54	10125	7210.35	8088.97	9085.1	8085.42	9147	8384.6	9023.84	10454.1	9635.05	8837.16	8713.92	8608.84	9053.97	8947.15
C18_positive	MEDP1348	LPC(16:1/0:0)	LPC(16:1/0:0)	GP	甘油磷脂类	LPC	溶血磷脂酰胆碱	C24H48NO7P	494.324	493.317	7.9823	M+	1.90235	1	0.7808	rp	76790-27-7	24779461	HMDB0010383	-	C04230	95448.3	82504.8	103512	96927.6	101818	102954	39903.5	45985.5	35364.7	42766.7	26767.5	25108.5	57564.7	71586.5	86229.4	73068.6	128480	225370	29215.2	51881.3	15365.9	17996.7	19813.7	18040.8	54797.5	54251.9	53951.7	53781.4
C18_positive	MW0121169	5-Bromo-1-phenyl-1H-pyrazole-4-carbonitrile	5-溴-1-苯基-1H-吡唑-4-甲腈	Heterocyclic compounds	杂环化合物	Heterocyclic compounds	杂环化合物	C10H6BrN3	247.98	246.975	1.7425	M+H	3.77075	4	0.9141	rp	76767-44-7	12958872	-	-	-	7102.61	7352.77	9109.08	8692.69	8210.37	7101.64	7515.31	4769.1	7978.32	8150.04	8170.98	6896.64	10895.2	12234.5	5430.84	6807.41	8018.09	6437.24	8257.41	6459.68	7228.37	7168.65	9748.63	9676.77	8823.68	8976.25	8758.56	8523.51
C18_positive	MW0009631	Quizalofop	奎扎洛夫	Benzene and substituted derivatives	苯及其衍生物	Benzene and substituted derivatives	苯及其衍生物	C17H13ClN2O4	345.064	344.056	7.1043	M+H	0.297346	2	0.9029	rp	76578-12-6	178795	-	-	C18763	5503.1	4988.36	4626.28	6067.09	5194.89	5760.75	5793.67	5461.72	6516.97	5481.06	5784.09	5950.61	5666.92	6673.85	4411.7	5755.72	5755.1	4634.21	5981.97	4531.39	6191.66	5461.42	5289.64	5437.39	5292	5196.86	5240.34	5244.47
C18_positive	MW0117290	Dimethylone	二甲酮	Benzene and substituted derivatives	苯及其衍生物	Benzene and substituted derivatives	苯及其衍生物	C12H15NO3	221.099	221.105	5.7298	M+	12.9963	2	0.683	rp	765231-58-1	9794472	-	96732	-	5362.05	7182.67	8649	9986.99	8190.96	8418.97	8792.94	8219.25	10746.9	7894.73	7645.88	8777.91	9984.06	11260.9	7674.9	6909.53	8604.68	7645.1	9434.83	8085.4	9007	9996.6	10410.7	8858.85	7112.17	8110.96	7777.18	7540.66
C18_positive	FDATN00971	Sultamicillin	Sultamicillin	Others	其他	Medicine	药物	C25H30N4O9S2	298.084	594.145	11.3085	M+2H	4.34218	4	0.6524	rp	76497-13-7 | 83105-70-8	444022	-	-	-	766.492	630.107	499.859	531.213	613.833	606.598	607.992	501.814	679.908	665.436	456.1	426.78	1225.19	470.396	413.885	377.327	567.669	522.837	1112.46	526.93	378.68	732.414	644.792	618.385	1207.09	1048.42	969.685	1195.7
C18_positive	FDATP00702	Ligustrazine hydrochloride	Ligustrazine hydrochloride	Others	其他	Medicine	药物	C8H13ClN2	173.082	172.077	5.8825	M+H	1.8155	4	0.7066	rp	76494-51-4 | 126400-81-5	156709	-	-	-	3174.18	2573.86	2399.78	2718.7	2859.4	2563.4	3308.8	2051.54	1852.87	2086.39	2349.68	2216.22	2147.58	2881.04	1591.36	1956.27	1696.45	2057.57	2442.09	2475.82	2783.93	1708.81	2227.72	3126.98	2294.7	2273.4	2250.11	2137.11
C18_positive	MW0111287	Sphinganine	鞘氨醇	SL	鞘脂类	SPH	鞘氨醇	C18H39NO2	302.306	301.298	6.631	M+H	0.358408	1	0.8083	rp	764-22-7	91486	HMDB0000269	-	C00836	69217.4	58732.7	62414.2	68175.7	61605.4	169993	106737	71830.6	190455	60671.4	55962.9	53049.9	199713	103192	129903	115969	160019	58801.5	140645	61095.7	224626	154457	186595	235852	147712	154555	151346	150969
C18_positive	MW0141374	13-Deoxycarminomycin	13-脱氧胭脂红霉素	Heterocyclic compounds	杂环化合物	Heterocyclic compounds	杂环化合物	C26H29NO9	538.153	499.184	11.7483	M+K	13.5585	4	0.5038	rp	76034-18-9	443829	-	-	C12428	122349	120522	110581	138398	124034	1400.72	117997	127994	139448	128383	130472	123530	1610.96	3999.88	119282	119138	124399	115843	135966	127749	127970	124846	115946	124840	34825.4	35199.2	33576.6	35234.1
C18_positive	MW0143235	4-[2,2-Dichloro-1-(4-methoxyphenyl)ethenyl]phenol	4-[2,2-二氯-1-(4-甲氧基苯基)乙烯基]苯酚	Benzene and substituted derivatives	苯及其衍生物	Benzene and substituted derivatives	苯及其衍生物	C15H12Cl2O2	295.021	294.021	5.8064	M+H	19.3124	3	0.7428	rp	75938-34-0	156639	-	-	C14237	5756.13	5262.87	5431.46	6156.76	5473.54	5043.04	5254.67	3563.05	5302.48	4907.54	4875.77	5429.44	5558.17	6785.41	4838.76	4394.15	5839.96	4420.82	5694.6	5141.93	5506.66	5219.6	5598.04	5494.54	4746.61	4704.39	4796.17	4760.28
C18_positive	MW0120329	4-Chloro-1,1-dioxidotetrahydrothiophen-3-yl acetate	4-Chloro-1,1-dioxidotetrahydrothiophen-3-yl acetate	Heterocyclic compounds	杂环化合物	Heterocyclic compounds	杂环化合物	C6H9ClO4S	170.981	211.991	13.8706	M+H-COCH2	5.01825	4	0.639	rp	75754-25-5	282947	-	-	-	1664.76	1419.76	1301.08	2811.28	1406.51	4831.38	1951.17	1640.78	1593.45	1631.93	2062.23	1576.51	1373.4	2583.23	1673.13	3973.58	1515.59	1376.58	2995.66	771.523	2192.41	2953.76	1947.67	1975.69	1809.08	1761.75	1825.15	1764.6
C18_positive	MW0169283	2-Amino-1-phenylethanol	2-氨基-1-苯基乙醇	Alcohol and amines	醇、胺类	Alcohols	醇类	C8H11NO	120.081	137.084	2.0191	M+H-H2O	0.0083584	1	0.9027	rp	7568-93-6	1000	HMDB0001065	59	C02735	158621	149700	157739	165810	155115	142156	199167	201045	208583	201755	202989	193351	181709	205995	156466	161740	167924	156056	200548	159873	198728	177253	201751	197591	231697	230184	232978	227508
C18_positive	MW0148180	Debromohymenialdisine	-	Heterocyclic compounds	杂环化合物	Heterocyclic compounds	杂环化合物	C11H11N5O2	204.087	245.091	0.7777	M+H-COCH2	0.68675	4	0.7331	rp	75593-17-8 | 125118-55-0	135451156	-	-	C19897	1483.58	2737.64	1372.07	2748.85	559.86	1555.22	8537.95	4051.37	3201.15	1170.3	1477.69	2657.05	2681.21	2653.02	720.322	2753.72	26.551	231.814	3745.1	2064.63	10659.5	12306.6	16565.5	15480.5	2571.9	2600.81	2324.58	2477.58
C18_positive	MW0168563	3,3'-Diamino-4,4'-dihydroxydiphenyl Sulfone	3-氨基-4-羟基苯砜	Benzene and substituted derivatives	苯及其衍生物	Benzene and substituted derivatives	苯及其衍生物	C12H12N2O4S	281.052	280.052	8.4442	M+H	18.9392	2	0.854	rp	7545-50-8	82047	-	4086	-	1430.49	1318.26	2139.11	2557.12	1296.97	1586.01	2134.99	1850.96	2102.37	1798.88	1451.55	1578.7	2051.53	5554.14	1318.88	1200.47	1562.84	1395.66	1644.01	1381.32	1542.07	1610.26	3258.93	2643.93	25614.5	25584.2	25900	25349.3
C18_positive	MW0114952	N-Acetyl-D-glucosamine	N-乙酰氨基葡萄糖	Carbohydrates and Its metabolites	碳水化合物及其代谢物	Sugar derivatives	糖衍生物	C8H15NO6	186.076	221.09	1.1677	M+H-2H2O	0.15	3	0.9574	rp	7512-17-6	439174	HMDB0000215	3356	C00140	277.834	535.952	722.85	764.799	76.729	796.473	2029.61	3155.88	1439.2	2384.74	1972.62	1574.92	715.981	634.345	840.64	603.765	716.407	921.976	3202.08	2957.43	4467.34	3553.24	3697.11	4175	994.706	1024.69	970.294	983.086
C18_positive	MW0110753	tert-Butylamine	2-甲基丙烷-2-胺	Alcohol and amines	醇、胺类	Amines	胺类	C4H11N	113.096	73.0891	9.9855	M+Na+NH3	9.62347	4	0.559	rp	75-64-9	6385	HMDB0143690	-	-	1.351	0.162	0.246	1.19	1.11	0.384	0.665	1.867	1.801	2.278	2.592	0.05	2.886	3.078	1.402	1.235	1.285	1.229	1.515	1.236	1.407	0.396	0.294	2.005	77.578	76.102	76.501	76.417
C18_positive	MW0004865	4-chloro-N-(2-methoxyphenyl)benzenesulfonamide	4-氯-N-(2-甲氧基苯基)苯磺酰胺	Benzene and substituted derivatives	苯及其衍生物	Benzene and substituted derivatives	苯及其衍生物	C13H12ClNO3S	254.04	297.023	3.2362	M+H-CO2	0.89575	4	0.7281	rp	7454-65-1	310128	-	-	-	1616.53	1175.99	1440.56	1980.14	1504.86	1491.67	1577.51	765.115	1359.09	1809.7	1726.27	1487.98	1865.55	2146.4	1566.52	1635.72	1784.58	1322.64	1470.99	1488.46	1545.68	1770.6	1742.59	1602.56	1288.5	1388.92	1029.22	1269.95
C18_positive	MW0105709	Arginine	L-精氨酸	Amino acid and Its metabolites	氨基酸及其代谢物	Amino acids	氨基酸	C6H14N4O2	219.079	174.112	2.4919	M-H+2Na	9.01491	1	0.5523	rp	74-79-3	6322	HMDB0000517	5502	C00062	1849.92	1353.36	1189.62	1603.71	1574.48	1771.5	8672.31	10316.5	12057.8	10473.5	9958.35	9056.04	716.227	934.016	1613.71	1068.92	2339.76	2739.63	11335.4	25370	5166.52	8319.77	7403.58	6976.13	10477.6	10598.4	10442.4	10427.7
C18_positive	MW0132744	Sinapic acid	3,5-二甲氧基-4-羟基肉桂酸	Organic acid and Its derivatives	有机酸及其衍生物	Organic acid and Its derivatives	有机酸及其衍生物	C11H12O5	224.065	224.069	10.7482	M+	7.84816	2	0.5358	rp	7362-37-0	637775	HMDB0032616	-	C00482	1.102	2.683	2.051	1.492	1.551	7.631	13.135	9.577	4.474	3.263	0.794	2.14	2.537	35.09	1.505	0.656	0.656	1.231	1.621	1.112	3.845	2.029	21.742	7.652	328.532	321.526	314.09	320.843
C18_positive	MW0144894	Allopumiliotoxin 267a	别嘌呤毒素 267a	Alkaloids	生物碱	Alkaloids	生物碱	C16H29NO2	268.232	267.22	0.717	M+H	11.9543	3	0.6807	rp	73376-38-2	5470308	-	-	C20034	7804.65	8727.92	6708.18	8311.01	5391.81	7393.59	11143.1	6707.16	5625.84	5667.81	5895.95	6679.26	17293.4	15137	7496.32	2467.41	757.757	1100.27	10575.6	1070.81	12551.4	8926.63	16300.2	15738.8	7433.11	7293.25	7397.7	7593.31
C18_positive	MW0105438	Adenine	腺嘌呤	Nucleotide and Its metabolites	核苷酸及其代谢物	Nucleotide and Its metabolites	核苷酸及其代谢物	C5H5N5	136.062	135.054	1.1677	M+H	0.25	3	0.8337	rp	73-24-5	190	HMDB0000034	85	C00147	12193.6	17730.8	16714.4	16935.8	14669.5	13195.1	29367.5	32850.2	29783.4	36310.5	21682	35811.5	8262.7	9059.61	8828.31	10240.4	8621.76	11171	27379.6	41484.9	32606.1	22539.3	36048.9	22674.8	12216.2	12970.5	13156.6	12114.7
C18_positive	MW0013003	1-Stearoyl-2-linoleoyl-sn-glycero-3-phosphoethanolamine	1-硬脂酰基-2-亚油酰基-sn-甘油-3-磷酸乙醇胺	GP	甘油磷脂类	PE	磷脂酰乙醇胺	C41H78NO8P	744.557	743.547	12.2366	M+H	1.86904	2	0.948	rp	7266-53-7	9546749	HMDB0008994	-	-	149191	94800.9	97063.1	108300	84670.1	99507.8	61827.3	32705.3	51746.4	88400.6	132426	115519	123244	155400	69868.6	119894	174059	131893	118958	110214	34730.6	58598.6	50890.3	46124.3	110555	108800	115815	110397
C18_positive	MW0137884	Dehydrocarpaine I	脱氢芸香碱 I	Heterocyclic compounds	杂环化合物	Heterocyclic compounds	杂环化合物	C28H48N2O4	477.362	476.361	7.8442	M+H	13.2485	3	0.8039	rp	72362-02-8	131750991	HMDB0030271	-	-	34239.7	30951.7	29957.9	36060.1	34383.6	32562.6	34267	32120.8	41032.7	36043.4	36101	31629.6	37949.8	40428.3	33397.2	30634.8	34612.6	29248	38413.6	33604.5	35884.8	35921.5	36371.3	37801	32788.3	33077.2	32891.8	32690
C18_positive	MW0147338	Cerbertin	塞尔贝坦	Heterocyclic compounds	杂环化合物	Heterocyclic compounds	杂环化合物	C32H44O11	622.324	604.288	9.6998	M+H+NH3	1.05496	4	0.7243	rp	7227-00-1	441851	-	-	C08857	523.754	660.207	927.133	1041.96	1032.59	1128.48	1782.46	3019.78	2201.27	999.955	1010.84	541.864	906.345	1492.69	795.382	570.336	851.4	1119.11	767.905	1261.83	1172.12	1148.91	1562.74	1091.3	1200.07	1068.23	1202.34	1261.93
C18_positive	MW0137280	Aflatoxin B2 alpha	黄曲霉毒素 B2 α	Heterocyclic compounds	杂环化合物	Heterocyclic compounds	杂环化合物	C17H14O6	337.075	314.079	8.4442	M+Na	17.4528	2	0.9351	rp	7220-81-7	23648	HMDB0035208	-	C16753	291.517	252.785	495.068	554.443	289.355	383.271	523.906	448.109	452.244	359.561	332.623	369.179	447.299	1252.3	251.538	264.733	334.135	290.071	362.956	277.774	377.898	363.152	981.685	678.49	5202.76	5157.19	5202.7	5104.11
C18_positive	MW0052375	Dihydromyoporone	二氢肌孔素	Aldehyde,Ketones,Esters	醛、酮、酯类	Ketones	酮类	C15H24O3	239.162	252.173	0.6265	M+H-CH2	11.1382	4	0.7865	rp	72145-16-5	51551	HMDB0035729	-	-	16856.4	14664.9	16342.7	16758.8	15835	16642.3	14162.7	15312.9	20450.6	13942.7	15862.8	12535.3	18868	20134.9	14362.2	14095.9	16664	10704.6	16413.6	14081.3	13755.2	20826.6	15118.7	16698.9	16671.8	17282.8	17429.3	17260.5
C18_positive	MW0109300	Prilocaine	丙胺卡因	Alcohol and amines	醇、胺类	Amines	胺类	C13H20N2O	193.159	220.158	5.6322	M+H-CO	1.40825	4	0.716	rp	721-50-6	4906	HMDB0014888	-	C07531	0.524	1.216	0.89	0.678	1.152	0.25	1.653	0.763	0.232	1.666	0.558	0.821	1.501	6.417	1.896	0.393	0.765	0.188	0.938	0.184	0.805	1.163	2.358	1.927	48.469	49.14	48.568	48.134
C18_positive	MW0160255	(S)-3-Hydroxydodecanoyl-CoA	(S)-3-羟基十二烷酰基-CoA	FA	脂肪酰类	Others	其他	C33H58N7O18P3S	804.223	965.277	4.133	M+H-C6H10O5	2.26889	4	0.6964	rp	72059-49-5	440603	HMDB0003936	-	C05262	2035.09	1696.92	1737.83	1993.63	1930.88	1926.12	1668.07	2323.01	2144.04	1838.57	2175.58	2007.13	1941.07	1851.83	1900.68	1912.44	1931.57	1602.01	1875.35	1689.33	1776.28	2094.42	2531.45	2086.41	1958.85	1956.93	1922.08	1831.56
C18_positive	MW0010027	L-Valine	L-缬氨酸	Amino acid and Its metabolites	氨基酸及其代谢物	Amino acids	氨基酸	C5H11NO2	118.086	117.079	0.7777	M+H	2.08744	1	0.946	rp	72-18-4	6287	HMDB0000883	5842	C00183	32043.4	28894.5	26181.6	31922.4	24571.3	33137	34261.9	31190.5	22794	32107.7	30613.9	29030.9	28261.2	29173.7	27812.6	22271.5	15283.7	14680	22031.4	16204.5	29678.8	30404.9	38809.9	40294.5	30179.2	29469.5	30392.7	30002.8
C18_positive	MW0157201	Staphyloxanthin	葡萄黄素	Terpenoids	萜类	Terpenoids	萜类	C51H78O8	387.277	818.57	8.9196	M+2H-HCOOH	11.8132	4	0.527	rp	71869-01-7	56928085	-	-	-	184709	170046	136507	154549	164059	113026	140126	116474	205655	150143	171083	156715	123273	148302	199739	157623	193152	149135	142767	148033	19584.8	159173	96953.4	150443	47761	40634.2	46772.9	29129.1
C18_positive	MW0148452	Didecyldimethylammonium chloride	双癸基二甲基氯化铵	Alcohol and amines	醇、胺类	Amines	胺类	C22H48ClN	406.317	361.348	7.9209	M+2Na-H	8.821	4	0.8217	rp	7173-51-5	23558	-	-	-	40.56	40.058	30.21	49.648	35.944	54.125	1068.29	1225.35	1180.33	1220.89	1146.1	1193.39	8.397	5769.74	4677.29	10.636	1.232	1.173	1.789	12.586	10.026	1.603	6.982	1.191	335.654	332.183	337.805	337.218
C18_positive	MW0141372	13-Azaprostanoic acid	13-氮杂前列烷酸	FA	脂肪酰类	FFA	游离脂肪酸	C19H37NO2	312.29	311.282	5.9285	M+H	3.02861	2	0.8997	rp	71629-07-7	123640	-	43397	-	42322.5	46211.1	42172.4	50010	39351	38125.9	212604	227134	233500	257946	218613	250179	8.397	44268.2	42842.2	39318	50635.5	26339	62155.6	51629.8	57518.2	55825.2	61635	72783.3	54270.7	55191.2	54887.1	55447.7
C18_positive	MW0001173	1-(4-Fluorophenyl)cyclohexanecarbonitrile	1-(4-氟苯基)环己腈	Benzene and substituted derivatives	苯及其衍生物	Benzene and substituted derivatives	苯及其衍生物	C13H14FN	226.098	203.111	0.1582	M+Na	0.06925	4	0.7483	rp	71486-43-6	736126	-	-	-	13146	13551.5	13120.3	15753.3	13730	12193.5	13618.8	11923.7	14625.8	13756.4	14326.6	13127.4	15476.5	14584	10165.5	12366	13491.4	11608.9	13880.1	12108.8	14508.7	14382.5	13261.4	14672.5	13173	13517.7	13467.5	13714.1
C18_positive	MW0143778	6beta-(Dimethylamino)-3beta,5-dihydroxy-5alpha-pregnan-20-one	6beta-(二甲氨基)-3beta,5-dihydroxy-5alpha-preg--20-one	Aldehyde,Ketones,Esters	醛、酮、酯类	Ketones	酮类	C23H39NO3	360.29	377.293	6.2031	M+H-H2O	3.33041	3	0.7699	rp	7144-27-6	252288	-	-	-	6686.05	6725.38	6563.9	6607.38	5860.55	6107.6	98518.8	102984	107054	104019	104834	105879	40.413	20.73	32360	32320.6	7.183	31428.2	8.933	11.697	34716.7	33869.3	7.642	33868.1	30340.5	30709.7	31109.6	30340.4
C18_positive	MW0115593	1,1,1-Trichloroethane	1,1,1-三氯乙烷	Others	其他	Hydrocarbon derivatives	烃衍生物	C2H3Cl3	173.962	131.93	13.0123	M+CH3CN+H	4.51212	3	0.7342	rp	71-55-6	6278	HMDB0041791	-	C18246	1.17145e+06	966820	949857	1.02255e+06	900019	1.14447e+06	1.10159e+06	1.78269e+06	1.32076e+06	990051	756530	997221	1.27902e+06	835794	1.02469e+06	928468	1.19558e+06	1.1496e+06	1.29038e+06	928093	1.44447e+06	689354	1.16031e+06	1.28867e+06	1.60594e+06	1.41959e+06	1.48404e+06	1.4824e+06
C18_positive	MW0169870	Spermine	精胺	Alcohol and amines	醇、胺类	Polyamines	多胺	C10H26N4	241.18	202.216	6.3411	M+K	4.36725	4	0.6519	rp	71-44-3	1103	HMDB0001256	255	C00750	9.361	17.266	11.777	26.843	23.761	22.547	6.418	5.546	5.93	2.228	5.747	12.94	28.915	62.134	14.532	14.465	19.419	11.492	15.321	9.088	20.483	28.73	27.036	26.909	270.24	279.66	296.431	290.023
C18_positive	MW0125782	1-Hexadecanoylpyrrolidine	1-十六烷基吡咯烷	Heterocyclic compounds	杂环化合物	Heterocyclic compounds	杂环化合物	C20H39NO	296.295	309.303	7.0123	M+H-CH2	2.0875	4	0.9504	rp	70974-48-0	247220	HMDB0032740	-	-	29739.9	26864.7	20195.6	56581.5	33741.6	27317.7	165989	160620	191348	715673	119404	266414	10.207	74341.7	50355.8	60275.9	72272.8	41785.8	103806	43157.5	47375.2	78982	57683.7	52426	31274.1	31599.3	32172.8	33448.1
C18_positive	MW0001167	1-(4-Fluorobenzyl)piperazine	1-(4-氟苄基）哌嗪	Benzene and substituted derivatives	苯及其衍生物	Benzene and substituted derivatives	苯及其衍生物	C11H15FN2	89.0594	194.122	7.6366	M+2H-H2O	7.31675	4	0.5968	rp	70931-28-1	796563	-	-	-	10016.8	10677.3	10355.7	10480	9663.06	8105.72	8679.44	11832.7	13263.3	10529.9	9711.08	9135.34	9722.55	9650.75	6833.87	8226.2	7298	7406.8	10203	9925.79	10238.8	9972.5	9908.76	11458.8	7671.84	8033.34	8085.8	8073.05
C18_positive	MW0157486	Thermospermine	嗜热精胺	Alcohol and amines	醇、胺类	Amines	胺类	C10H26N4	241.179	202.216	8.3115	M+K	0.625	3	0.6235	rp	70862-11-2	194365	-	-	C19669	94.089	78.874	66.369	58.508	82.527	103.529	112.638	77.278	67.897	70.949	49.658	79.824	94.639	127.748	54.345	78.233	71.749	85.795	57.129	55.998	112.469	89.746	78.731	89.229	435.362	413.242	439.31	417.348
C18_positive	MW0054480	Lyngbic acid	灵二酸	FA	脂肪酰类	FFA	游离脂肪酸	C15H28O3	279.195	256.204	6.1275	M+Na	4.67824	2	0.7173	rp	70607-97-5	11065049	-	65452	-	3.724	0.085	4.636	0.267	0.062	0.781	0.157	5.012	0.211	2.102	0.143	2.055	0.31	10.755	0.181	0.067	2.795	1.548	2.887	2.445	0.041	0.069	0.316	0.169	145.165	178.411	158.22	164.364
C18_positive	FDATN00664	Alphagan	Brimonidine Tartrate	Others	其他	Medicine	药物	C15H16BrN5O6	444.032	443.027	1.1827	M+H	1.01077	4	0.7254	rp	70359-46-5 | 59803-99-5	54405	-	-	-	161.445	127.907	216.357	28.223	27.483	104.599	165.759	73.524	152.85	187.952	87.125	40.965	98.726	84.883	139.581	189.615	322.735	165.645	258.194	169.085	328.595	180.698	133.866	421.161	247.048	222.938	264.488	252.091
C18_positive	MW0119651	3-Iodo-6-nitro-1H-indazole	-	Heterocyclic compounds	杂环化合物	Heterocyclic compounds	杂环化合物	C7H4IN3O2	271.94	288.935	0.4029	M+H-H2O	2.939	4	0.6817	rp	70315-70-7	12475306	-	-	-	7005.67	7742.24	9021.77	9515.41	7357.13	16208	7963.61	1511.41	8654.09	7869.59	9186.71	7406.55	7375.06	8011.37	6188.82	10370.3	7689.87	9211.68	8978.38	7431.29	10403.6	6160.98	13032.2	7800.68	5988.15	6000.53	5918.7	5862.74
C18_positive	MW0138577	Ivermectin	伊维菌素	Heterocyclic compounds	杂环化合物	Heterocyclic compounds	杂环化合物	C48H74O14	897.48	874.508	12.2366	M+Na	13.5591	4	0.7538	rp	70288-86-7 | 71827-03-7 | 70161-11-4	6321424	-	879	-	244.688	681.389	410.678	195.343	1821.98	1421.83	425.818	872.176	1398.7	603.42	1356.74	482.344	324.931	1423.13	891.508	561.824	667.713	710.581	1683.1	2083.97	915.139	2240.35	1782.33	1737.17	1079.97	1045.1	1057.68	1079.85
C18_positive	MW0016928	Cholesteryl docosahexaenoic acid	CE（22：6（4Z，7Z，10Z，13Z，16Z，19Z））	FA	脂肪酰类	CE	胆固醇酯	C49H76O2	349.296	696.585	9.866	M+2H	3.63475	4	0.6669	rp	70110-50-8	53477890	HMDB0006733	-	C02530	1703.03	1079.5	1483.29	1820.07	1181.69	1306.04	1774.22	3299.36	2121.06	1961.39	1970.4	1440.3	1410.17	1198.18	1414.83	1365.71	1595.39	801.426	1833.65	1598.16	1557.47	1303.88	1781.58	2047.74	1890.73	1866.43	1833.67	1857.18
C18_positive	MW0110953	Chlormequat	灭虫灵	Others	其他	Others	其他	C5H13ClN+	217.107	122.074	10.642	3M+3Na-H	3.3695	4	0.6725	rp	7003-89-6	13837	-	-	C18585	6348.2	4439.82	4677.77	4947.06	4634.22	5382.28	4835.21	4715.82	7419.47	5821.61	5297.66	4639.74	4030.84	4138.43	2814.01	3788.23	4537.34	3478.99	4983.56	3986.2	6631.61	5015.49	5961.61	6562.24	4059.7	4064.28	3893.17	4110.76
C18_positive	MW0193993	Iodotyrosine	3-碘化酪氨酸	Amino acid and Its metabolites	氨基酸及其代谢物	Amino acid derivatives	氨基酸衍生物	C9H10INO3	345.932	306.971	12.982	M+K	7.58477	2	0.7096	rp	70-78-0	439744	HMDB0000021	-	C02515	18824.4	11324.7	18086.9	17861.3	20508.9	16159.1	11562.1	36233.8	22505.3	10519.8	20394.3	18179.2	7749.33	18186.7	14700.2	15541	15846.9	14283.3	20224.7	18016.7	20725.5	24792.1	18238.7	21034.3	17748.9	16221.3	17575.5	18035.6
C18_positive	MW0106516	DL-Lysine	DL-赖氨酸	Amino acid and Its metabolites	氨基酸及其代谢物	Amino acid derivatives	氨基酸衍生物	C6H14N2O2	130.086	146.106	0.611	M+H-NH3	3.6805	4	0.666	rp	70-54-2 | 6899-06-5	866	HMDB0142894	-	-	2028.79	2262.3	2174.56	1979.96	1582.43	1884.69	2514.11	2090.53	806.118	2188.11	2361.89	2249.14	2091.15	2427.47	2010.35	1779.95	1701.87	1741.02	2116.18	977.964	2359	1802.8	1983.33	2073.75	7582.04	7698.9	7588.73	7566.65
C18_positive	MW0007289	Halofantrine	卤泛群	Benzene and substituted derivatives	苯及其衍生物	Benzene and substituted derivatives	苯及其衍生物	C26H30Cl2F3NO	482.156	499.166	5.2124	M+H-H2O	12.4028	2	0.7771	rp	69756-53-2	37393	HMDB0015349	-	-	6405.41	5840.33	5725.87	7500.45	5669.59	7022.94	6327.53	6302.21	7205.29	3367.46	6933.48	6642.97	4773.16	6166.2	4724.84	4364.48	4354.59	4842.57	5765.85	6032.03	5634.24	5421.86	5856.92	4925.85	5836.32	6052.06	5937.06	5915.14
C18_positive	MW0127047	Gamma-Caprolactone	γ-己内酯	Aldehyde,Ketones,Esters	醛、酮、酯类	Esters	酯类	C6H10O2	115.075	114.068	3.6314	M+H	0.444164	1	0.9545	rp	695-06-7	12756	HMDB0003843	-	-	27341.4	25775.4	28580	30182.7	24644.4	26775.6	26662.9	25414	32198.2	26358.3	26491.6	26041.2	25366.2	38799.6	24513.6	26000.1	23680.5	27223.1	25518.1	23012.5	27700.4	26537.3	31625.6	34142.1	40062.1	40462.6	40372.3	40460.3
C18_positive	MW0142831	3beta-Cyclopentyl-5alpha-androstan-17beta-ol	3beta-Cyclopentyl-5alpha-androstan-17beta-ol	Alcohol and amines	醇、胺类	Alcohols	醇类	C24H40O	345.309	344.308	8.3688	M+H	14.2004	3	0.8502	rp	6944-47-4	246162	-	-	-	35488.8	31601	31467.9	42486.9	43955.8	35159.2	43183.4	42546.9	48649.9	40194.9	36576.8	35987.6	39952.3	40583.1	33208.3	35730.5	37694.3	35213.8	43126.8	33051.5	45185.7	48131.2	40863.9	51402.1	35451.4	35747.4	35804.4	35695.8
C18_positive	MW0143877	6-Oxabicyclo[3.1.0]hexane-2-undecanoic acid methyl ester	6-氧杂双环[3.1.0]己烷-2-十一烷酸甲酯	Organic acid and Its derivatives	有机酸及其衍生物	Organic acid and Its derivatives	有机酸及其衍生物	C17H30O3	265.217	282.219	8.154	M+H-H2O	1.23725	4	0.72	rp	6938-17-6	243758	-	-	-	0.122	0.105	0.068	0.075	0.038	0.104	0.515	0.129	0.036	0.078	0.294	0.118	0.075	1.852	0.01	0.064	0.078	0.313	0.03	0.367	0.027	0.149	0.326	0.276	42.469	42.81	42.434	42.801
C18_positive	MW0127234	1-[(2-Aminoethyl)sulfanyl]-4-bromobenzene	1-[(2-氨基乙基)硫烷基]-4-溴苯	Heterocyclic compounds	杂环化合物	Heterocyclic compounds	杂环化合物	C8H10BrNS	191.971	232.97	13.1076	M+H-COCH2	15.9352	4	0.7254	rp	69326-62-1	420615	-	-	C78402	9674.81	85048.6	73573.1	74641.7	90650.4	99081	104086	75719.8	83137.4	88504.1	81635.7	76293.1	108056	226788	73560.3	97660.9	100404	79984.7	88879	178654	103208	206386	218302	86563.5	131966	136294	137169	132888
C18_positive	MW0052468	Dodecanedioic acid	十二烷二酸	FA	脂肪酰类	FFA	游离脂肪酸	C12H22O4	195.138	230.152	5.6066	M+H-2H2O	1.91817	2	0.7107	rp	693-23-2	12736	HMDB0000623	5596	C02678	1.043	0.403	0.203	1.049	0.572	0.464	0.457	0.679	0.308	0.322	0.604	0.713	0.635	4.395	0.128	0.099	0.786	0.294	0.188	0.692	0.502	0.216	1.969	0.767	64.89	67.099	66.754	66.188
C18_positive	MW0106031	beta-Citryl-L-glutamic acid	β-柠檬酰-L-谷氨酸；β-柠檬酰谷氨酸	Amino acid and Its metabolites	氨基酸及其代谢物	Amino acid derivatives	氨基酸衍生物	C11H15NO10	344.059	321.07	1.2281	M+Na	1.0105	4	0.9754	rp	69281-09-0	189741	HMDB0013220	-	C20775	3181.51	3097.8	2429.91	2406.82	2250.14	4295.5	587.939	1866.35	1026.83	594.87	1369.31	909.081	2498.62	2920.02	3306.4	4052.28	3947.69	5322.38	2344.66	2128.12	2864.84	2221.99	2069.53	2480.34	4354.8	4243.04	4443.6	4405.35
C18_positive	MW0108342	Monocrotophos	久效磷	Organic acid and Its derivatives	有机酸及其衍生物	Phosphoric acids	磷酸类化合物	C7H14NO5P	224.065	223.061	11.7483	M+H	11.5984	2	0.6843	rp	6923-22-4	5371562	HMDB0031805	-	C18663	15.709	17.506	14.898	20.522	17.699	18.043	36.665	30.027	23.259	12.303	16.354	14.996	12.436	56.358	10.086	17.935	22.072	5.176	14.194	11.895	15.271	19.036	18.488	19.8	488.153	488.987	478.157	488.719
C18_positive	MW0003729	3,8-Dihydroxy-1-methylanthraquinone-2-carboxylic acid	3,8-二羟基-1-甲基蒽醌-2-羧酸	Benzene and substituted derivatives	苯及其衍生物	Benzene and substituted derivatives	苯及其衍生物	C16H10O6	281.051	298.048	10.7482	M+H-H2O	17.4135	2	0.8301	rp	69119-31-9	14379528	HMDB0030830	-	-	107.671	190.174	221.635	251.457	138.823	336.247	380.932	315.469	303.468	141.714	108.461	187.31	148.341	1024.09	103.567	100.926	110.602	104.922	122.992	153.73	168.628	155.006	557.92	449.684	6193.07	6073.07	6102.47	6159.55
C18_positive	MW0170017	Xanthine	黄嘌呤	Nucleotide and Its metabolites	核苷酸及其代谢物	Nucleotide and Its metabolites	核苷酸及其代谢物	C5H4N4O2	153.035	152.033	1.1978	M+H	13.4425	1	0.6217	rp	69-89-6	1188	-	-	C00385	102592	92026.4	93081.9	108614	95446.6	98692.6	95221	107670	113748	111734	104874	106148	129320	142998	102972	99386.8	110972	93294.5	123118	106483	122761	106942	127646	124485	103915	104532	106276	103921
C18_positive	MW0009710	Salicylic acid	水杨酸	Benzene and substituted derivatives	苯及其衍生物	Benzene and substituted derivatives	苯及其衍生物	C7H6O3	121.028	138.032	9.7149	M+H-H2O	0.663542	2	0.9337	rp	69-72-7	338	HMDB0001895	616	C00805	35363.7	32703.2	32433.3	38268.9	37166.9	36361.6	39405.9	43222.8	46838.5	43061.4	38661.9	36213.3	40762.9	43559.8	35723.2	31510.1	36637.1	33463.9	38176.9	36650.1	41661.9	39461.1	44725.3	41697.7	35378.9	35021	35503.3	34956.5
C18_positive	MW0145043	Ampicillin sodium	氨苄青霉素钠	Benzene and substituted derivatives	苯及其衍生物	Benzene and substituted derivatives	苯及其衍生物	C16H18N3NaO4S	357.067	371.092	12.1415	M+H-CH3	1.076	4	0.7238	rp	69-52-3	23663979	HMDB0014559	-	-	3709.73	4166.23	3935.26	4932	3709.76	3856.47	2708.2	2223.04	2358.14	2111.98	1171.05	1258.53	1469.46	1098.28	1983.96	1564.98	3225.31	14741.9	2850.26	5357.98	1466.05	3492.4	2445.31	3298.36	2476.81	2447.13	1430.02	2723.24
C18_positive	MW0124314	Himbacine	欣巴辛	Heterocyclic compounds	杂环化合物	Heterocyclic compounds	杂环化合物	C22H35NO2	346.275	345.267	6.3716	M+H	1.57835	2	0.9028	rp	6879-74-9	6436265	-	68418	-	3478.33	3180.3	3019.52	3270.12	2839.97	2903.31	13685.4	16316.2	16791.2	17531.3	11472.6	13416.9	42.514	16.25	8.457	18.466	1.556	14.78	44.435	80.771	444.376	8.635	27.354	13.658	5925.06	5983.74	5959.54	5998.48
C18_positive	MW0148864	methyl (1S,9R,10S,12S,13E,18R)-13-ethylidene-10-hydroxy-18-(hydroxymethyl)-15-methyl-8-aza-15-azoniapentacyclo[10.5.1.01,9.02,7.09,15]octadeca-2,4,6-triene-18-carboxylate	-	Organic acid and Its derivatives	有机酸及其衍生物	Organic acid and Its derivatives	有机酸及其衍生物	C22H29N2O4+	358.199	385.213	2.659	M+H-C2H4	3.16875	4	0.6767	rp	6871-44-9	12309276	-	-	-	2.808	17.06	21.621	10.524	22.898	31.692	41.65	11.923	12.253	15.989	22.834	33.172	23.379	21.042	21.649	22.667	77.619	94.829	27.987	13.384	6.016	1.528	20.924	6.38	135.65	131.834	127.948	130.739
C18_positive	MW0107794	Leu-Gly	L-亮氨酰-L-甘氨酸	Amino acid and Its metabolites	氨基酸及其代谢物	Small Peptide	小肽	C8H16N2O3	189.123	188.116	1.8981	M+H	0.475	3	0.7946	rp	686-50-0	97364	HMDB0028929	24012	-	1.716	4.66	1.196	3.048	2.8	2.487	2.204	2.396	3.636	3.029	6.792	1.599	4.224	2.472	1.13	2.695	11.226	3.147	1.642	0.461	3.265	3.82	2.519	2.471	100.077	99.644	110.443	63.261
C18_positive	MW0147676	Clofilium	氯非菌属	Benzene and substituted derivatives	苯及其衍生物	Benzene and substituted derivatives	苯及其衍生物	C21H37ClN+	356.288	338.262	8.9349	M+NH4	18.214	3	0.606	rp	68379-02-2	2798	-	-	-	206199	167682	200566	199418	190927	186536	177766	198071	273243	206284	259927	124817	183933	209777	197498	172306	205553	166088	185493	185369	125231	189761	131948	190535	82295.1	76958.9	77780.5	73083.6
C18_positive	MW0127106	Dioctylphosphinic acid	二辛基次膦酸	Organic acid and Its derivatives	有机酸及其衍生物	Organic acid and Its derivatives	有机酸及其衍生物	C16H35O2P	329.2	290.238	2.1251	M+K	3.66875	4	0.6662	rp	683-19-2	99411	-	-	-	3.39282e+06	3.34196e+06	3.06648e+06	3.83786e+06	3.43954e+06	3.31056e+06	3.90681e+06	3.54935e+06	4.16146e+06	4.41948e+06	3.65504e+06	3.73072e+06	3.6608e+06	3.89296e+06	3.30766e+06	3.2994e+06	3.41426e+06	3.00649e+06	5.02846e+06	4.2466e+06	5.14182e+06	3.37634e+06	3.46009e+06	3.53841e+06	30857.3	34887.5	33009.2	35142.6
C18_positive	MW0111078	Linoleoyl ethanolamide	亚油酰基乙醇酰胺	Alcohol and amines	醇、胺类	Amines	胺类	C20H37NO2	324.29	323.282	6.4777	M+H	5.2575	2	0.9033	rp	68171-52-8	5283446	HMDB0012252	-	-	2908.61	2836.25	2711.66	2187.63	1537.39	4457.88	21155.6	21694.4	25170.1	25340.3	22230.6	22938.9	341.516	398.804	583.009	853.059	610.529	1055.7	5749.67	9313.58	1554.38	4365.1	7992.56	4794.61	7143.06	7211.99	7092.35	7197.61
C18_positive	ZINC14438713	cis-3-Hexenyl tiglate	顺-3-己烯基-2-甲基-反-2-丁烯酸酯	FA	脂肪酰类	FFA	游离脂肪酸	C11H18O2	183.138	182.131	3.6976	M+H	0.0661635	2	0.7018	rp	67883-79-8	15461361	HMDB0038279	-	-	0.07	0.039	0.038	0.318	0.532	0.095	0.527	0.123	0.045	0.027	0.05	0.067	0.092	6.867	0.007	0.018	0.062	0.033	0.545	0.533	0.081	0.037	0.194	0.34	47.047	46.573	46.529	46.541
C18_positive	MW0017134	cis-11-Methyl-2-dodecenoic acid	顺式-Δ2-11-甲基十二碳烯酸	FA	脂肪酰类	FFA	游离脂肪酸	C13H24O2	195.174	212.178	7.4829	M+H-H2O	0.551715	2	0.5271	rp	677354-23-3	11469920	-	-	C18206	5.056	7.211	2.409	1.89	2.944	3.771	3.189	8.97	2.998	4.627	2.38	0.788	4.143	10.46	2.798	1.402	4.631	2.045	3.755	4.931	1.699	2.552	2.749	3.528	96.097	100.888	96.075	89.561
C18_positive	MW0118743	2-Methyl-4-propyl-1,3-oxathiane	2-甲基-4-丙基-1,3-氧杂环丁烷	Heterocyclic compounds	杂环化合物	Heterocyclic compounds	杂环化合物	C8H16OS	135.044	160.092	0.2599	2M+2Na+K	4.53525	4	0.6486	rp	67715-80-4	101010	HMDB0031572	-	-	4366.92	4070.26	4453.08	4977.18	3564.3	4002.16	3729.09	2129.39	5922.1	4513.86	4323.45	4020.02	4734.51	5695.74	3345.14	3465.45	4611.63	3321.41	16364.5	3072.84	4294.44	5962.17	4644.26	5115.5	4513.58	4474.38	4502.47	4460.39
C18_positive	MW0115182	N-Dimethylaminoprostaglandin F2alpha	N-二甲氨基前列腺素 F2α	Alcohol and amines	醇、胺类	Amines	胺类	C22H41NO3	368.317	367.309	8.5896	M+H	13.3892	4	0.506	rp	67508-09-2	5283101	-	-	-	159.129	226.95	170.762	146.786	104.19	120.2	2338.13	2205.97	2674.45	2874.22	2367.01	2378.61	248.992	14.14	145.943	70.492	52.727	25.679	28.471	84.904	22.151	296.207	256.393	74.191	429.318	426.739	452.492	377.257
C18_positive	MEDP1333	LPC(0:0/20:4)	LPC(0:0/20:4)	GP	甘油磷脂类	LPC	溶血磷脂酰胆碱	C28H50NO7P	544.34	543.332	8.2314	M+	18.7689	1	0.769	rp	67341-29-1	52924038	HMDB0061699	-	-	16429.2	15083.2	14327.2	15397.2	16065.9	16303.4	16527.7	19256.2	17906.6	17580	15859.3	15614.8	8846.58	10420.6	12815.2	8263.89	9681.45	11711.4	17743.7	22847.1	13800.8	16236.2	17897.8	14800.3	10283.1	10700.5	10400.1	10447
C18_positive	MW0108628	N-Acetylhistamine	N-乙酰组胺	Alcohol and amines	醇、胺类	Amines	胺类	C7H11N3O	153.091	153.09	3.3266	M+	2.3528	1	0.568	rp	673-49-4	69602	HMDB0013253	-	C05135	2.202	1.254	3.558	2.821	0.618	3.788	5.925	3.97	4.919	2.073	1.012	1.399	3.032	50.182	1.148	1.29	1.294	1.835	1.738	1.238	2.362	3.028	5.312	7.258	298.662	302.23	298.758	300.878
C18_positive	MW0126552	Simeton	西蒙顿	Heterocyclic compounds	杂环化合物	Heterocyclic compounds	杂环化合物	C8H15N5O	236.091	197.128	5.2124	M+K	0.8495	4	0.7292	rp	673-04-1	12654	-	-	-	3692.44	3276.78	3375.16	4089.57	3455.47	3457.84	3567.77	3976.38	4474.22	3204.62	4069.87	4152.94	3100.68	3684.05	2516.98	2457.22	2800.7	2910.13	3691.09	3504.61	3566.74	3146.92	3360.54	3771.26	3301.42	3503.97	3397.93	3419.81
C18_positive	MW0109077	Perhexiline maleate	马来酸哌克昔林	Aldehyde,Ketones,Esters	醛、酮、酯类	Esters	酯类	C23H39NO4	394.296	393.288	4.7735	M+H	2.72775	4	0.6863	rp	6724-53-4 | 103516-75-2 | 103516-76-3	5284439	-	-	-	0.296	0.814	1.924	3.66	2.124	1.958	6.408	13.11	10.555	6.551	6.112	22.594	3.375	2.199	1.42	0.282	11.704	0.691	32.067	3.075	20.686	1.228	0.616	14.37	46.832	51.774	53.204	53.632
C18_positive	MW0127456	Dimethyl sulfoxide	二甲基亚砜	Others	其他	Others	其他	C2H6OS	79.0215	78.0139	0.8533	M+H	1.25745	2	0.896	rp	67-68-5	679	HMDB0002151	3985	C11143	2.20131e+06	1.90986e+06	1.73378e+06	2.55863e+06	2.19843e+06	2.27387e+06	1.82845e+06	1.94814e+06	2.6149e+06	2.35311e+06	1.92323e+06	2.20485e+06	2.44789e+06	2.29015e+06	1.71072e+06	1.87588e+06	2.09782e+06	1.83724e+06	2.33043e+06	2.11556e+06	2.30456e+06	2.48877e+06	2.09549e+06	2.21223e+06	2.05633e+06	2.08834e+06	2.04278e+06	2.0399e+06
C18_positive	MW0113851	Acetone	丙酮	Aldehyde,Ketones,Esters	醛、酮、酯类	Ketones	酮类	C3H6O	145.007	58.0419	13.2772	3M+3K-H	1.1621	4	0.7218	rp	67-64-1	180	HMDB0001659	3745	C00207	10341.2	19149.7	4354.96	1054.91	22422.2	7921.51	52216.7	12717.1	13469.8	17272.8	22690.7	6485.34	25581.8	65830.8	12105	7692.36	9512.95	8654.67	21663.7	17011.9	18640	12790.5	17204.3	11258.4	13783	13369.4	13169.7	14164.2
C18_positive	MW0124186	Furazolidone	呋喃唑酮	Aldehyde,Ketones,Esters	醛、酮、酯类	Ketones	酮类	C8H7N3O5	208.033	225.039	8.4398	M+H-H2O	6.46336	2	0.6931	rp	67-45-8	5323714	HMDB0014752	-	C07999	15.915	12.565	20.852	8.244	6.053	11.579	8.91	46.645	14.509	7.872	10.679	8.076	20.683	79.302	10.815	10.279	11.683	14.079	14.108	14.137	10.869	16.045	48.225	20.413	403.819	412.807	406.975	398.808
C18_positive	MW0014631	5,6-Dihydro-5,6-dihydroxy-y,y-carotene	5,6-二氢-5,6-二羟基-y,y-胡萝卜素	Others	其他	Hydrocarbon derivatives	烃衍生物	C40H60O2	573.467	572.459	10.8233	M+H	0.730359	3	0.7995	rp	66803-17-6	53477761	HMDB0003071	-	-	10918.8	8893.82	10123.6	11632.8	11141.9	11345.9	12719.9	15757.1	14506.8	12894.9	11990.6	12247.7	10832.9	12849.6	10067.8	9907.45	9793.64	9761.5	12416.7	11560.5	13615.5	14302.9	12712.7	13527.1	10301.9	10828.8	10665.2	10714.1
C18_positive	MW0006576	Cinitapride	西尼他必利	Benzene and substituted derivatives	苯及其衍生物	Benzene and substituted derivatives	苯及其衍生物	C21H30N4O4	361.223	402.227	10.355	M+H-COCH2	0.731925	4	0.732	rp	66564-14-5	68867	HMDB0015698	-	-	3100.34	3669.01	3413.96	4626.14	3869.14	4258.48	4642.67	7131.06	6264.87	4487.54	4556.1	3538.81	4052.12	3960.31	2502.8	2840.67	2370.04	3259.18	3979.43	3531.22	4813.35	4748.18	4963.49	4836.93	3800.55	3725.34	3634.35	3664.87
C18_positive	MW0004839	4-Chloro-3-nitrobenzenesulfonohydrazide	4-氯-3-硝基苯磺酰肼	Benzene and substituted derivatives	苯及其衍生物	Benzene and substituted derivatives	苯及其衍生物	C6H6ClN3O4S	105.934	250.977	0.3814	M+H-C6H10O4	8.1145	4	0.5832	rp	6655-80-7	2774214	-	-	-	5047.5	5415.77	5177.81	5104.09	7632.29	5248.86	4293.16	1605.86	8329.7	2414.07	5030.69	6262.63	5948.54	6842.53	1888.23	4748.66	6034.15	7046.62	8204.34	1635.59	5351.34	7201.77	4645.4	5337.45	6653.61	7008.72	7204.78	6725.33
C18_positive	MW0126532	3-(2-Methylpropyl)-3a,4,5,6-tetrahydro-2-benzofuran-1(3h)-one	3-(2-甲基丙基)-3a,4,5,6-四氢-2-苯并呋喃-1(3h)-one	Heterocyclic compounds	杂环化合物	Heterocyclic compounds	杂环化合物	C12H18O2	195.137	194.131	3.6852	M+H	0.476754	2	0.5714	rp	66211-45-8	111213	HMDB0034450	-	-	0.984	1.565	0.132	2.588	0.926	0.598	1.572	1.001	1.892	0.452	0.353	0.813	0.411	1.412	0.765	0.934	0.286	0.623	0.695	1.355	0.912	0.446	0.462	0.539	28.543	27.979	26.936	28.235
C18_positive	MW0169988	Uracil	尿嘧啶	Nucleotide and Its metabolites	核苷酸及其代谢物	Nucleotide and Its metabolites	核苷酸及其代谢物	C4H4N2O2	113.034	112.027	1.2129	M+H	0.95	3	0.6843	rp	66-22-8	1174	HMDB0000300	258	C00106	1013.82	828.53	797.895	737.898	711.807	736.398	1733.75	2070.22	1096.32	1655.78	1615.63	1567.8	848.891	360.7	359.802	543.064	711.932	464.303	4338.15	4345.56	5294.79	3805.86	4124.18	4089.07	1819.7	1795.77	1821	1808.44
C18_positive	MW0124331	Hydrastinine	羟氨苄青霉素	Heterocyclic compounds	杂环化合物	Heterocyclic compounds	杂环化合物	C11H13NO3	122.09	207.089	4.3336	M+H-C3H2O3	1.14175	4	0.7223	rp	6592-85-4	3638	-	-	-	993.946	745.386	1544.11	1678.98	573.243	1482.47	1344.85	1057.51	383.706	1335.75	461.274	1311.58	1157.87	2022.25	1360.79	462.036	1673.08	217.433	1507.06	1386.26	912.245	1718.1	1714.2	1679.46	1409.17	1558.51	1619.54	1549.47
C18_positive	MW0053506	Germanicol cinnamate	日耳曼肉桂酸酯	Aldehyde,Ketones,Esters	醛、酮、酯类	Esters	酯类	C39H56O2	557.446	556.428	10.2184	M+H	18.7096	3	0.6183	rp	65883-48-9	131751572	HMDB0034514	-	-	133267	127895	126711	151616	142173	141358	141150	206170	173447	153053	147739	139078	150897	160227	123961	123406	139144	125048	151784	141896	157742	161088	161812	170210	148292	150909	147460	144808
C18_positive	MEDL00344	Glycyl-L-tyrosine	甘氨酸-酪氨酸	Amino acid and Its metabolites	氨基酸及其代谢物	Small Peptide	小肽	C11H14N2O4	239.103	238.095	1.2432	M+H	0.381393	1	0.8226	rp	658-79-7	92829	HMDB0028853	23813	-	51.312	0.525	53.652	46.143	0.634	0.813	728.504	735.391	0.548	707.461	9.375	603.539	2.009	1.289	1.679	1.78	3.679	5.85	3.497	3.417	1.307	2.155	2.187	1.856	430.303	430.664	458.084	434.654
C18_positive	MW0146807	B-Norcholesterol	B-降胆固醇	Hormones and hormone related compounds	激素及激素相关物质	Hormones and hormone related compounds	激素及激素相关物质	C26H44O	355.341	372.339	6.9816	M+H-H2O	13.0816	3	0.7725	rp	6544-70-3	242346	-	-	-	5154.21	4218.9	4411.97	4944.62	3958.89	3821.56	38158.4	38281.1	41423.6	40713.5	35371.6	37845.2	3757.33	3773.72	4193.58	1729.01	1564.72	964.464	21906.5	5110.23	31724.5	16926.8	28318.8	23627.6	8235.42	8435.25	8294.08	8258.03
C18_positive	MW0054613	LPE(20:4/0:0)	LPE(20:4/0:0)	GP	甘油磷脂类	LPE	溶血磷脂酰乙醇胺	C25H44NO7P	524.275	501.286	8.2001	M+Na	0.91764	4	0.7276	rp	652149-09-2	42607465	HMDB0011517	-	-	2687.27	3453.53	2980.16	3769.19	3531.01	3368.81	2548.54	4844.24	3368.04	3651.01	2513.3	2780.01	2286.21	2423.61	2362.96	3978.26	2607.62	4291.69	2724.27	3456.14	4218.61	3123.71	2842.18	2939.23	3261.75	3295.15	3359.68	3266.51
C18_positive	MW0146464	(1R,4S,5'S,6R,6'R,8R,10Z,12S,13S,14Z,16Z,20R,21R,24S)-6'-[(2S)-Butan-2-yl]-4',24-dihydroxy-12-[(2R,4S,5S,6S)-5-[(2S,4S,5S,6S)-5-hydroxy-4-methoxy-6-methyloxan-2-yl]oxy-4-methoxy-6-methyloxan-2-yl]oxy-21-methoxy-5',11,13,22-tetramethylspiro[3,7,19-trioxatetracyclo[15.6.1.14,8.020,24]pentacosa-10,14,16,22-tetraene-6,2'-oxane]-2-one	(1R,4S,5'S,6R,6'R,8R,10Z,12S,13S,14Z,16Z,20R,21R,24S)-6'-[(2S)-Butan-2-yl]-4', 24-dihydroxy-12-[(2R,4S,5S,6S)-5-[(2S,4S,5S,6S)-5-hydroxy-4-methoxy-6-methyloxan-2-yl]oxy-4- methoxy-6-methyloxan-2-yl]oxy-21-methoxy-5',11,13,22-tetramethylspiro[3,7,19-trioxatetracyclo[15.6.1.14,8.020,24]pentacosa-10,14,16 ,22-tetraene-6,2'-oxane]-2-one	Heterocyclic compounds	杂环化合物	Heterocyclic compounds	杂环化合物	C49H76O15	859.529	904.518	12.2214	M+H-HCOOH	0.466657	4	0.7385	rp	65195-53-1	6450339	-	-	-	5689.38	4296.94	3994.42	5832.28	4825.66	3177.26	10302.4	9116.46	11549.9	10546.6	7749.87	5018.18	4930.51	3748.09	1788.31	2621.75	3676.97	3402.21	6547.71	7491.36	7518.52	7893.95	8935.95	9901.89	5899.85	5646.38	5009.2	5761.7
C18_positive	MEDN0243	Pyridoxine	吡哆素	Heterocyclic compounds	杂环化合物	Heterocyclic compounds	杂环化合物	C8H11NO3	361.14	169.074	1.1528	2M+Na	6.40619	1	0.7319	rp	65-23-6	1054	HMDB0000239	-	C00314	4943.02	3368.82	3886.26	3411.57	3019.16	4116.28	5974.89	5325.29	4754.34	5851.24	4876.94	1099.67	3395.95	2179.13	4202.73	3076.96	4091.41	6380.19	1132.82	716.324	971.478	190.673	437.111	4085.47	11283.6	11353.3	11599.1	11422
C18_positive	MEDP1600	4-Propylphenol	4-丙基苯酚	Benzene and substituted derivatives	苯及其衍生物	Benzene and substituted derivatives	苯及其衍生物	C9H12O	119.085	136.089	7.7532	M+H-H2O	0.83119	1	0.6652	rp	645-56-7	12580	HMDB0032625	-	C14311	30930.6	49058.2	55585	40683.1	41290.3	24620.9	19491.3	32971.6	26485.1	26306.9	34007.5	21148.1	25140.1	36336.1	28278.4	26585.3	22044.5	25807.1	31968.4	26618.9	38426.4	30552.4	46985	29831.1	29922.1	26806.7	30418.7	30336.6
C18_positive	MW0113089	4'-Isopropylacetophenone	4'-异丙基苯乙酮	Aldehyde,Ketones,Esters	醛、酮、酯类	Ketones	酮类	C11H14O	107.049	162.105	6.4166	M+H-C4H8	1.33725	4	0.7177	rp	645-13-6	12578	HMDB0032025	-	-	7373.6	4766.91	7993.47	11710.3	11563.2	10982.5	9190.66	10581.9	4357.74	5713	1337.79	903.841	10977.6	14139.8	12058.9	11340.3	7504.76	7647.02	6314.43	6270.27	6233.73	4209.86	11114.8	11615.3	2192.11	2399.99	2518.23	2482.03
C18_positive	MW0157227	Amylocaine	胺卡因	Benzene and substituted derivatives	苯及其衍生物	Benzene and substituted derivatives	苯及其衍生物	C14H21NO2	218.15	235.157	0.5957	M+H-H2O	0.5725	4	0.7359	rp	644-26-8	10767	-	-	-	0.717	0.542	1.296	0.741	0.418	0.306	1.113	0.54	0.976	1.668	1.044	1.127	0.773	1.451	2.178	2.325	2.018	1.696	1.53	0.873	2.524	2.152	4.827	2.533	24.774	24.266	24.755	27.555
C18_positive	MW0116515	1-(4-Fluorophenyl)piperazine dihydrochloride	1-(4-氟苯基)哌嗪二盐酸盐	Heterocyclic compounds	杂环化合物	Heterocyclic compounds	杂环化合物	C10H15Cl2FN2	181.122	252.06	4.2428	M+H	19.5715	2	0.6428	rp	64090-19-3	16211916	-	96616	-	0.306	0.118	0.266	0.402	0.129	0.158	0.304	0.252	0.374	0.065	0.04	0.34	0.239	10.977	0.044	0.098	0.063	0.456	0.053	0.164	0.059	0.032	0.277	0.53	69.759	69.491	69.961	69.222
C18_positive	MW0107510	Ile-Ser	L-异亮氨酸-L-丝氨酸	Amino acid and Its metabolites	氨基酸及其代谢物	Small Peptide	小肽	C9H18N2O4	219.134	218.127	1.6971	M+H	0.1	3	0.8488	rp	6403-14-1	7021815	HMDB0028916	23658	-	1.768	2.705	3.695	0.604	3.008	2.995	3.817	2.368	2.956	3.892	219.036	8.004	3.39	3.796	3.453	2.093	8.017	11.824	6.683	8.735	3.531	4.468	2.454	4.123	412.216	428.156	418.153	419.265
C18_positive	MW0105409	Acetic acid	醋酸	Organic acid and Its derivatives	有机酸及其衍生物	Organic acid and Its derivatives	有机酸及其衍生物	C2H4O2	124.024	60.0211	13.6068	3M+3Na-H	5.4265	4	0.6312	rp	64-19-7	176	HMDB0000042	3206	C00033	904.691	760.111	745.985	863.034	479.121	800.933	822.546	1042.53	902.138	527.658	1991.39	850.39	795.569	1635.03	1243.91	815.877	1694.5	908.472	833.641	732.847	415.426	960.024	893.271	1014.34	776.153	798.912	775.055	745.726
C18_positive	MW0014038	3-Hexaprenyl-4,5-dihydroxybenzoic acid	3-己烯-4，5-二羟基苯甲酸酯	Benzene and substituted derivatives	苯及其衍生物	Benzene and substituted derivatives	苯及其衍生物	C37H54O4	545.402	562.402	11.4298	M+H-H2O	5.16389	3	0.6374	rp	63975-40-6	5280760	HMDB0001063	5976	C05200	21426.2	20781.9	18684.2	25038.2	22383.4	19945.7	25112.4	28236.7	29755.4	42058.7	22487.5	18985.2	21890.8	26636.2	17601.7	22558	21897.6	18884.8	23638.8	22916.4	25904.3	25286.1	24536.8	25675.2	24198.9	24185.6	22947.8	22719.6
C18_positive	MW0107796	1-(2-Amino-4-methylpentanoyl)-4-hydroxypyrrolidine-2-carboxylic acid	1-(2-氨基-4-甲基戊酰基)-4-羟基吡咯烷-2-羧酸	Amino acid and Its metabolites	氨基酸及其代谢物	Small Peptide	小肽	C11H20N2O4	267.134	244.142	2.3249	M+Na	8.268	4	0.5807	rp	63912-01-6	20847829	HMDB0028930	-	-	11.889	5.132	14.591	13.018	20.9	2.964	14.561	4.643	7.678	31.958	10.567	1.079	17.84	2.759	13.015	2.804	5.854	24.959	10.916	2.366	11.262	10.549	1.049	14.639	305.23	315.207	307.085	308.554
C18_positive	MW0006618	Clofibrate	氯贝特	Benzene and substituted derivatives	苯及其衍生物	Benzene and substituted derivatives	苯及其衍生物	C12H15ClO3	225.061	242.071	10.752	M+H-H2O	15.7917	2	0.5616	rp	637-07-0	2796	HMDB0014774	-	C06916	1.451	0.835	1.175	1.244	1.285	1.072	5.909	2.831	1.407	0.756	1.13	0.47	1.31	7.343	0.873	0.977	0.714	0.364	1.165	2.453	2.68	6.601	8.908	0.955	168.019	164.927	163.121	166.168
C18_positive	MW0121545	Sumiki's acid	5-羟甲基-2-呋喃甲酸	Organic acid and Its derivatives	有机酸及其衍生物	Organic acid and Its derivatives	有机酸及其衍生物	C6H6O4	186.996	142.027	0.6567	M-H+2Na	6.35797	2	0.7298	rp	6338-41-6	80642	HMDB0002432	6680	C20448	669067	619773	547990	673883	745447	661434	609519	684634	970145	667299	761950	656617	607806	758031	679397	673265	863188	790867	817176	859199	688276	655806	646766	665922	715524	727575	721934	704223
C18_positive	MW0148485	Isorescinnamine, dihydro-	异戊二胺，二氢-	Alkaloids	生物碱	Alkaloids	生物碱	C35H44N2O9	637.306	636.305	11.0961	M+H	8.80557	2	0.921	rp	6335-49-5	232430	-	85095	-	31431.1	48668	40904.5	50043.6	67629.8	33239.7	37516.9	121825	54299.3	110500	91012.1	80828.9	22762.3	70525.2	29666.1	32480.4	36697.9	35206.4	43041.5	51870	27726.1	50835.4	32324.7	35775.9	55079.9	52619.3	55011.8	53757.5
C18_positive	MW0000149	Berberine chloride	氯化小檗碱	Others	其他	Medicine	药物	C20H18ClNO4	372.102	371.092	11.1265	M+H	5.08603	3	0.6994	rp	633-65-8	12456	HMDB0041837	-	-	4910.42	2447.93	1402	2351.13	1509.94	2113.58	4843.92	1731.59	1880.07	1429.14	3538.54	721.647	7862.29	1342.5	827.909	872.084	1509.81	1440.76	9706.84	2816.08	1852.96	1749.55	3645.53	2220.2	8452.78	8521.75	8334.34	8572.25
C18_positive	MW0109196	L-Phenylalanine	L-苯丙氨酸	Amino acid and Its metabolites	氨基酸及其代谢物	Amino acids	氨基酸	C9H11NO2	166.086	165.079	2.0191	M+H	0.0157608	1	0.9806	rp	63-91-2	6140	HMDB0000159	28	C00079	108983	99885.6	104095	109052	104498	97399.4	132331	133478	139065	135039	129962	125953	119630	136328	100894	106681	114237	99940.8	129090	102756	131904	118915	132764	132070	152782	152678	153583	151015
C18_positive	MW0056883	Colfosceril palmitate	菊苣棕榈酸酯	GP	甘油磷脂类	PC	磷脂酰胆碱	C40H80NO8P	734.565	733.562	12.1902	M+H	3.77348	2	0.9302	rp	63-89-8	452110	HMDB0000564	5548	C00157	454738	163737	363218	71077.6	244217	81072.2	420324	157041	274720	243117	270322	256124	150556	155928	211653	310997	241889	177638	225620	226669	154396	60893.3	205989	186370	172209	181470	178445	174611
C18_positive	MW0108213	Methionine	L-蛋氨酸	Amino acid and Its metabolites	氨基酸及其代谢物	Amino acids	氨基酸	C5H11NO2S	150.058	149.051	1.1378	M+H	1.42913	1	0.9345	rp	63-68-3	6137	HMDB0000696	5664	C00073	1065.77	631.358	1266.89	850.596	941.416	706.876	2154.05	2031.82	2359.99	2209.72	2295.96	1949.37	160.509	741.893	1086.17	820.269	1132.61	1525.02	888.333	737.191	1248.24	296.253	932.844	1177.83	3964.54	3983.71	4061.2	3975.08
C18_positive	MW0053898	Palmitaldehyde	棕榈醛	Aldehyde,Ketones,Esters	醛、酮、酯类	Aldehydes	醛类	C16H32O	282.28	240.245	11.1113	M+CH3CN+H	1.2	3	0.8139	rp	629-80-1	984	HMDB0001551	6317	C00517	32403.8	72957.2	36620.4	36289.9	33706.9	41658.2	57350	75348.1	86550.6	74328.1	58083.5	51145.9	117927	44048.7	34099	33526.9	36482.3	29335.4	41550	44539.9	51993.4	69903.2	86139.9	73103.5	41085.1	42316.5	40940.7	39997.5
C18_positive	MEDP0513	Palmitic amide	十六碳酰胺	FA	脂肪酰类	Others	其他	C16H33NO	256.264	255.256	10.8768	M+H	0.758441	1	0.988	rp	629-54-9	69421	HMDB0012273	-	-	10372.7	15810.7	9551.9	11658.5	11393.6	10807.2	15468.4	19508.5	20833.2	17783	14899.4	13513.4	20715.3	11711	10455.8	9716.55	10423.7	8219.11	11617.3	12464.9	14548.4	19621.1	20704.7	17765	12228.9	12027.1	12434.7	12339.1
C18_positive	MW0011966	1,8-Octanediol	1，8-辛二醇	Alcohol and amines	醇、胺类	Alcohols	醇类	C8H18O2	169.122	146.131	5.7066	M+Na	6.34131	2	0.6946	rp	629-41-4 | 31762-64-8	69420	-	-	-	8.229	3.56	7.94	7.559	7.505	4.842	10.242	7.741	7.121	2.522	6.474	2.458	7.342	27.822	2.187	2.857	2.652	3.761	10.597	6.32	6.609	10.166	8.373	8.992	195.677	194.81	198.145	189.358
C18_positive	MW0123617	Diclomezine	双氯美嗪	Heterocyclic compounds	杂环化合物	Heterocyclic compounds	杂环化合物	C11H8Cl2N2O	338.968	254.001	12.2366	M+K+HCOOH	5.75651	2	0.6433	rp	62865-36-5	93341	-	-	C18458	15330.1	12361.3	12630.4	17348.7	14758.4	15188.2	14054.5	14237	17858.5	17330.3	17764.4	15531.3	15545.1	16765.5	12698	14248.6	16319.6	12878	14484.8	14160.9	15916.9	16974.4	18049.1	15022.9	15128.9	14739.6	15127.1	13950.9
C18_positive	MW0106702	Filfiline	非菲林	Heterocyclic compounds	杂环化合物	Heterocyclic compounds	杂环化合物	C26H47NO	412.341	389.366	7.8442	M+Na	29.4133	4	0.6149	rp	62726-18-5	6443229	HMDB0030953	-	-	842.416	1496.85	1587.87	1809.79	515.109	701.025	40.905	11.597	44.695	44.929	27.237	16.229	62.848	67.376	121.735	226.887	132.495	352.203	213.262	48.702	52.525	28.519	41.703	31.511	219.915	182.755	215.57	215.918
C18_positive	MW0008036	(2-Fluoro-benzyl)-(2-morpholin-4-yl-ethyl)-amine	(2-氟-苄基)-(2-吗啉-4-基-乙基)-胺	Benzene and substituted derivatives	苯及其衍生物	Benzene and substituted derivatives	苯及其衍生物	C13H19FN2O	261.146	238.148	2.143	M+Na	9.64625	4	0.5587	rp	626209-54-9	2772118	-	-	-	68.002	23.369	49.925	38.345	133.629	110.442	186.305	143.187	197.611	218.658	195.485	69.615	111.343	294.861	181.238	228.372	174.576	250.026	249.137	245.186	195.126	155.756	222.93	256.815	659.237	676.267	671.256	681.793
C18_positive	MW0056748	N-Palmitoylsphingomyelin	软脂酰鞘磷脂	SL	鞘脂类	SM	鞘磷脂	C39H79N2O6P	703.575	702.568	12.2214	M+H	0.00695892	2	0.9113	rp	6254-89-3	9939941	HMDB0010169	-	-	322174	308936	348580	416448	402427	396133	359257	307498	376512	435232	438257	352140	374958	34196.7	347935	323481	265757	244880	422967	61040.3	409417	350478	404870	393373	352260	357570	376618	375505
C18_positive	MW0117997	2,5-Dimethylfuran	2,5-二甲基呋喃	Heterocyclic compounds	杂环化合物	Heterocyclic compounds	杂环化合物	C6H8O	119.049	96.0575	1.1528	M+Na	2.03727	4	0.7016	rp	625-86-5	12266	HMDB0033182	-	-	203.078	111.624	10.129	168.938	124.57	171.624	513.685	882.241	318.89	1468.74	975.122	301.286	89.892	35.377	120.13	69.925	43.92	333.082	207.187	276.659	306.736	187.042	285.981	282.597	1285.03	1261.84	1252.16	1215.19
C18_positive	MW0119782	3-Vinyl-1,2-dithiacyclohex-4-ene	3-乙烯基-1,2-二硫代环己基-4-烯	Heterocyclic compounds	杂环化合物	Heterocyclic compounds	杂环化合物	C6H8S2	186.034	144.007	12.6787	M+CH3CN+H	14.7612	2	0.773	rp	62488-52-2	525328	-	263591	-	49773.5	47298.6	45108.1	57303.6	48691.4	44842.5	25181.9	50668.8	68550.1	55815.3	57114.5	49489.9	47079.5	56394.7	45220	48945	53513.9	42590.4	46952.5	51689.5	17172.5	58077.9	60766	63179.8	41697.3	44966.8	42831.7	44236.3
C18_positive	MW0119055	3-(4-Methylpent-3-enyl)thiophene	3-(4-甲基戊-3-烯基)噻吩	Heterocyclic compounds	杂环化合物	Heterocyclic compounds	杂环化合物	C10H14S	123.096	166.082	4.3336	M+H-CO2	4.053	4	0.9083	rp	62469-65-2	566107	HMDB0038183	-	-	18831.7	16061.9	17665.4	20292	17595.4	17854.2	17199.7	15633.4	22182.8	17440.5	17614.8	16681.2	20969.8	25060.2	9719.87	18900.8	19016.6	15892.3	19886.4	17363.2	21290.5	20931.6	19611.7	21554.9	18323.8	18168.1	18629.9	18382.9
C18_positive	pmb2826	(S)-2-Hydroxy-2-methylsuccinic acid	(S)-2-羟基-2-甲基丁二酸	Organic acid and Its derivatives	有机酸及其衍生物	Organic acid and Its derivatives	有机酸及其衍生物	C5H8O5	149.044	148.037	4.4094	M+H	1.32931	2	0.9102	rp	6236-09-5	441696	-	-	C02614	63838.3	53736.7	70822.9	71759.4	48621	53896.8	55139.9	57984.2	64157.3	57411.2	61906.6	58068.8	82087.4	107877	54617.2	53628.7	58771.4	50053.1	58432.1	55274.7	67020.4	62648.8	85859.2	82306.9	129900	132819	129511	126137
C18_positive	MW0102923	Tricaproin	甘油三己酸酯	GL	甘油脂类	TG	甘油三酯	C21H38O6	369.264	386.267	8.9349	M+H-H2O	5.37504	2	0.7129	rp	621-70-5	12131	HMDB0031125	-	-	13428.5	15455.6	5829.78	14123.1	12672.2	8884.36	6444.75	14497.8	11131.8	14100.1	15016.6	7453.46	9441.95	14019.5	12878.6	12329.9	5393.69	10468.4	12820.4	13302.2	15235	13170	15105	14093	6832.18	6979.07	5590.91	6356.16
C18_positive	MW0131282	3-(3-Hydroxyphenyl)propanoic acid	3-(3-羟基苯基)丙酸	Organic acid and Its derivatives	有机酸及其衍生物	Organic acid and Its derivatives	有机酸及其衍生物	C9H10O3	167.07	166.063	8.0744	M+H	2.5145	4	0.9409	rp	621-54-5	91	HMDB0000375	-	C11457	56945.5	44488.4	62877.1	80194.1	68303.6	72389.9	62592.4	67169.9	52347.5	48149.8	37596.9	29096.3	80744.9	85360.5	76495.4	73576.1	58957.7	50842.3	51458.1	53632.3	48299	42953.2	61585.2	74312.2	30703.9	31002.4	31002.5	30377.6
C18_positive	MW0168753	Aniline	苯胺	Benzene and substituted derivatives	苯及其衍生物	Benzene and substituted derivatives	苯及其衍生物	C6H7N	116.052	93.0578	1.7425	M+Na	5.62688	4	0.6274	rp	62-53-3	6115	HMDB0003012	489	C00292	2150.83	2128.75	2767.05	2606.18	2466.58	2039.3	2412.99	2206.2	2548.71	2689.39	2217.06	2205.62	3281.31	3852.21	1729.59	2229.59	2555.3	2191.03	2762.63	2271.39	2235.88	2146.3	3705.7	3345.38	2650.99	2724.44	2644.21	2634.64
C18_positive	MEDP0125	Choline	胆碱	Tryptamines,Cholines,Pigments	色胺、胆碱、色素	Cholines	胆碱类	C5H14NO+	104.107	104.108	0.7019	M+H	0.629841	1	0.9494	rp	62-49-7	305	HMDB0000097	56	C00114	136231	125566	114628	152283	90046.6	103676	175459	167062	149092	136772	145441	146739	74798.4	76979.7	68315.2	70677.5	64255.5	53070.6	110708	88404.8	123256	128129	126783	128922	89142.1	87934.3	88623.3	88614.9
C18_positive	MW0012863	1-Myristoyl-2-stearoyl-sn-glycero-3-phosphocholine	1-肉豆蔻酰基-2-硬脂酰基-sn-甘油-3-磷酸胆碱	GP	甘油磷脂类	PC	磷脂酰胆碱	C40H80NO8P	756.552	733.562	8.3688	M+Na	0.948524	2	0.7186	rp	61510-09-6	131150	HMDB0006727	-	-	38353.3	159485	67017.4	98858.6	75190	73740.3	12858.1	17561.8	13700.8	22779.3	42208.9	57098	25138.3	34288.2	15922.5	61819.4	117051	31334.8	84145.9	92552.8	36089.3	125012	17438.7	34075.2	62226.4	53673	69423	67278.3
C18_positive	MW0053857	Chimyl alcohol	1-O-十六烷基-sn-甘油；1-O-十六烷基甘油；桂皮醇；甘油十六烷基醚	GL	甘油脂类	MG	单甘油酯	C19H40O3	358.332	316.298	9.0578	M+CH3CN+H	3.34507	2	0.5122	rp	6145-69-3 | 53584-29-5	72733	-	24090	-	198.215	64.91	42.106	252.522	158.415	251.016	6565.61	6813.7	7202.13	8161.9	6143.26	6910.99	13.32	88.706	97.677	6.703	72.739	52.885	631.361	453.618	564.345	3.21	3.998	3.056	349.822	322.237	344.5	353.64
C18_positive	MW0104841	1,2-Ethylenediphosphonic acid	2-膦酰基乙基膦酸	Organic acid and Its derivatives	有机酸及其衍生物	Organic acid and Its derivatives	有机酸及其衍生物	C2H8O6P2	190.988	189.98	13.0771	M+H	2.43564	2	0.7273	rp	6145-31-9	80247	HMDB0013233	-	-	9245.73	7441.4	6763.99	6843.37	6416.88	8686.75	9058.13	6245.66	11109.3	9225.79	9091.39	11183.4	6028.29	7590.04	5421.62	6164.72	2553.75	5815.52	8097.28	8301.71	24681.3	7937.45	8452.63	20656.6	11451	9808.24	10481.7	12017.4
C18_positive	MW0112082	2-Aminoacetophenone	2-氨基苯乙酮	Aldehyde,Ketones,Esters	醛、酮、酯类	Ketones	酮类	C8H9NO	118.065	135.068	5.7298	M+H-H2O	0.267963	2	0.7389	rp	613-89-8	11952	HMDB0032628	-	-	3069.58	2857.88	2959.8	3388.28	3006.82	3114.26	2157.77	3159.61	3750.79	3411.51	3046.06	2917.89	3313.42	3886.14	3067.59	2990.58	2995.23	2609.57	3442.31	2923.64	3249.98	3525.97	3459.53	3403.41	2924.89	3175.18	3048.48	3021.55
C18_positive	MW0127332	4-((2-Methyl-3-furyl)thio)-5-nonanone	4-((2-甲基-3-呋喃基)硫代)-5-壬酮	Aldehyde,Ketones,Esters	醛、酮、酯类	Ketones	酮类	C14H22O2S	203.053	254.134	0.717	2M+Na+2K	2.37325	4	0.6941	rp	61295-50-9	62182	HMDB0037141	-	-	11667.5	8638.68	7469.59	8565.98	9016.31	9654.44	1379.46	1894.57	2612.73	1282.29	565.566	1410.45	3391.24	511.889	9160.5	6542.45	6676.47	8323.89	2017.13	31.065	737.513	352.159	1165.35	2325.07	2785.01	2215.23	2605.95	2582.49
C18_positive	MW0013396	PE(18:0/20:4(5Z,8Z,11Z,14Z))	2-花生四烯酰基-1-硬脂酰基-sn-甘油-3-磷酸乙醇胺	Others	其他	Others	其他	C43H78NO8P	750.544	767.547	10.642	M+H-H2O	0.919334	3	0.9943	rp	61216-62-4	5289133	HMDB0009003	-	-	22880.5	27960.5	29079.6	36752.1	42875.2	35879.3	27219.3	22503	62443.7	47463.5	44448.6	21711.1	18969.8	25240.5	20295	21422.5	21531.9	2982.07	50132.8	51601.4	65986.5	64305.3	60732.1	6176.15	23139.4	21861.1	22797.4	22420.7
C18_positive	MW0142817	3beta-(1-Pyrrolidinyl)-5alpha-pregnane-11,20-dione	3beta-(1-Pyrrolidinyl)-5alpha-preg-e-11,20-dione	Aldehyde,Ketones,Esters	醛、酮、酯类	Ketones	酮类	C25H39NO2	386.303	385.298	5.9285	M+H	6.70279	3	0.7595	rp	61148-11-6	248263	-	-	-	1897.06	154.607	80.194	408.998	1382.43	765.768	32784.7	33414.9	33914.8	39851.9	36230.5	34671.3	53.858	27.042	132.841	91916.7	96072.5	89377	104900	7.038	98731.2	96321.2	89511.2	96316.3	13691.3	13561.5	13270.7	13890.1
C18_positive	MW0007573	Mefenamic acid	甲灭酸	Benzene and substituted derivatives	苯及其衍生物	Benzene and substituted derivatives	苯及其衍生物	C15H15NO2	288.119	241.11	5.1369	M+HCOO+2H	10.3575	2	0.8284	rp	61-68-7	4044	HMDB0014922	-	C02168	3016.49	3336.86	3118.39	4427.68	3553.65	3623.92	3837.4	2882.66	4455.73	3483.43	3773.91	3882.22	3070.5	3694.88	2743	3084.31	3358.74	2710.3	3953.13	3235.31	3865.56	3786.79	4069.14	3779.81	3615.14	3835.54	3673.01	3406.15
C18_positive	MW0054544	1-Arachidonoyl-sn-glycero-3-phosphocholine	LysoPC(20:4(5Z,8Z,11Z,14Z))	GP	甘油磷脂类	LPC	溶血磷脂酰胆碱	C28H50NO7P	544.338	543.332	9.0265	M+H	4.02322	3	0.8764	rp	60701-99-7	24779476	HMDB0010395	-	C04230	8584.74	4417.14	6652.6	5835.89	5449.22	5552.25	13021.5	25036.3	16088.8	22298.4	13029.8	17072.7	3930.89	2836.62	5722.18	3095.07	7765.29	16530.1	10314.9	17392.6	6258.13	7321.71	8413.59	7849.78	16222.8	15887.9	16646	17549.2
C18_positive	MW0157351	Taurolithocholic acid sodium salt	牛磺石胆酸钠盐	Bile acids	胆汁酸	Bile acids	胆汁酸	C26H44NNaO5S	506.289	505.284	12.2366	M+H	1.55774	4	0.7125	rp	6042-32-6	23662757	-	-	-	1264.6	747.275	714.175	891.656	621.398	599.983	823.785	784.177	1215.1	808.959	664.304	570.778	2164.1	3446.47	2801.99	2190.95	2928.87	1205.43	678.287	439.545	459.249	815.373	904.696	452.479	1955.07	2074.31	1825.92	1512.06
C18_positive	MW0106147	Chlorthiophos	氯硫磷	Organic acid and Its derivatives	有机酸及其衍生物	Phosphoric acids	磷酸类化合物	C11H15Cl2O3PS2	382.95	359.958	0.6718	M+Na	3.17925	4	0.9265	rp	60238-56-4 | 21923-23-9	30859	-	-	C18970	14686.2	14173.8	15451.1	15858	10803.9	12634.7	39856.9	34443.6	21082.1	32711.9	29456.8	38779.7	5210.55	4947.29	4855.58	6657.47	4119.95	3625.24	24356.2	11489.4	38640.5	30315.6	36195.3	40656.8	15518.8	15663.3	15469.2	15173.7
C18_positive	MW0053696	TAG 38:0	-	GL	甘油脂类	TG	甘油三酯	C41H78O6	325.294	666.58	6.4624	M+2H-H2O	7.7402	4	0.5895	rp	60175-30-6	4589033	HMDB0031124	-	-	225.386	113.228	135.142	146.557	118.114	122.236	1905.78	1790.65	1937.59	2189.19	1942.39	2019.71	80.433	102.986	97.489	72.52	75.22	123.081	283.644	233.511	95.757	146.051	56.11	51.678	547.049	597.168	537.374	458.43
C18_positive	MW0124681	Linalyl oxide	氧化芳樟醇	Heterocyclic compounds	杂环化合物	Heterocyclic compounds	杂环化合物	C10H18O2	358.304	170.131	8.9503	2M+NH4	21.3869	2	0.5244	rp	60047-17-8	22310	HMDB0035907	-	-	13701.1	27189.2	25460.3	23155.5	20800.1	16476.6	13103.5	16575.8	27793.9	19479.4	23181.2	19390.6	19063.7	23309.3	11297.4	22131.7	22735.1	10219	16789	17969.9	26855.5	19830.1	31722	26622.5	14103	14424.6	11391.6	10291.9
C18_positive	MW0111330	Tridihexethyl	三己乙基	Benzene and substituted derivatives	苯及其衍生物	Benzene and substituted derivatives	苯及其衍生物	C21H36NO+	319.286	318.28	10.328	M+H	4.22475	4	0.6548	rp	60-49-1	20299	HMDB0014648	-	C07861	3238.02	2660.05	3088.57	3651.68	4654.74	4123.27	4852.82	6164.4	3715.92	4718.28	4720.26	3939.14	2857.98	3789.87	3568.73	3417.16	3764.07	2864.86	3600.44	3902.28	4222.77	4606.61	4435.45	5762.41	3993.62	3890.09	3891.51	3739.07
C18_positive	MEDN0006	L-Tyrosine	L-酪氨酸	Amino acid and Its metabolites	氨基酸及其代谢物	Amino acids	氨基酸	C9H11NO3	182.081	181.074	1.1528	M+H	1.389	1	0.8972	rp	60-18-4	6057	HMDB0000158	34	C00082	1794.95	3207.35	4352.89	3190.69	1371.88	3751.02	18455	15450.3	19030	17925.1	19455	17866.8	6.23	2338.75	1322.1	1435.59	2191.26	6081.51	11880.4	8289.36	10301.5	7817.45	8263.65	9951.38	19926	19541.5	19548.5	19559.8
C18_positive	MW0112867	3-Methyl-2-butanol	3-甲基-2-丁醇	Alcohol and amines	醇、胺类	Alcohols	醇类	C5H12O	202.969	88.0888	0.6718	M-2H+3K	11.7681	2	0.6879	rp	598-75-4	11732	HMDB0033777	-	-	129957	124364	123792	139402	129485	121276	203943	191066	196023	197873	201962	208145	82428.7	99696.6	89429.6	91078.5	97790.7	82979.9	196897	133907	209441	187834	196839	207965	141284	142438	141484	139243
C18_positive	MW0017202	Citramalic acid	柠苹酸	Organic acid and Its derivatives	有机酸及其衍生物	Organic acid and Its derivatives	有机酸及其衍生物	C5H8O5	149.044	148.037	10.752	M+H	0.335106	2	0.8419	rp	597-44-4	1081	HMDB0000426	5415	C00815	10.917	8.812	0.653	2.179	9.357	9.194	8.987	2.548	16.248	8.344	5.926	9.861	6.266	49.215	0.603	0.383	8.715	8.321	0.897	9.512	8.246	0.989	10.75	13.034	513.631	505.449	500.616	506.638
C18_positive	MW0150045	Glu-Leu	谷氨酸-亮氨酸	Amino acid and Its metabolites	氨基酸及其代谢物	Small Peptide	小肽	C11H20N2O5	243.134	260.137	5.1369	M+H-H2O	2.12096	2	0.9448	rp	5969-52-8	9813855	HMDB0028823	44684	-	99787.2	104808	99795.6	115233	108664	107147	116288	102068	142093	104113	120279	118212	116289	128033	95603.5	98464.2	103752	88565.6	120496	101178	126271	129890	123821	115435	110241	109301	110486	108253
C18_positive	MW0109835	Thiodicarb	硫双威	Others	其他	Insecticide	杀虫剂	C10H18N4O4S3	355.065	354.049	4.6521	M+H	20.7265	2	0.7218	rp	59669-26-0	9601227	-	-	-	12584.3	9301.21	10635.9	10650.7	10411	10589.4	9421.05	10657	9672.14	10679.6	21183.3	18105.5	9825.4	10780.1	8761.99	8106.42	15809.3	12193.3	17242.4	9773.83	12760.4	12621.6	9659.3	9745.12	11880.3	12006.6	12010.7	11217.7
C18_positive	MW0054400	L-Menthyl acetoacetate	L-乙酰乙酸薄荷酯	Aldehyde,Ketones,Esters	醛、酮、酯类	Esters	酯类	C14H24O3	223.17	240.173	6.5697	M+H-H2O	3.63825	4	0.6668	rp	59557-05-0	43045	HMDB0032369	-	-	0.462	1.091	0.449	1.875	0.649	0.287	2.252	1.917	1.295	1.585	0.692	0.904	0.444	14.83	1.346	1.589	0.385	1.751	2.487	0.69	3.26	0.469	2.424	0.937	126.305	130.515	108.808	125.811
C18_positive	MW0157143	Soyasapogenol B	大豆皂醇B	Terpenoids	萜类	Triterpene	三萜	C30H50O3	423.354	458.376	8.3688	M+H-2H2O	5.18037	2	0.8478	rp	595-15-3	115012	HMDB0034648	-	C08980	71106.2	62143.2	67162.5	84095.6	78200.9	75142.6	82590	80360	102442	80667	80917.8	82529.6	81282.9	84405.7	68693.4	68804.2	76187.4	71058.4	84180.8	67199.9	86421.9	88175.2	84455	98051.9	71651.6	72851.6	72624.3	72030.5
C18_positive	MW0011615	(S)-(-)-Citronellal	(S)-(-)-香茅醛	Aldehyde,Ketones,Esters	醛、酮、酯类	Aldehydes	醛类	C10H18O	201.149	154.136	3.7101	M+HCOO+2H	0.711019	2	0.7192	rp	5949-05-3	443157	HMDB0035842	-	-	0.089	0.904	0.086	0.739	0.727	0.101	0.45	0.101	0.927	0.683	0.747	1.008	0.036	9.185	0.065	0.067	1.196	0.193	0.025	0.04	0.85	0.068	0.389	0.241	66.965	65.896	64.222	66.222
C18_positive	MEDL01839	8-Methyl-6-nonenoic acid	8-甲基-6-壬酸	FA	脂肪酰类	FFA	游离脂肪酸	C10H18O2	171.138	170.131	6.6463	M+H	0.05	3	0.9459	rp	59320-77-3	5365959	HMDB0012183	-	C18202	233.162	238.923	240.935	307.489	379.174	256.162	277.515	167.729	288.135	184.322	212.923	222.293	250.609	479.929	178.591	205.229	214.887	209.239	233.976	206.113	247.914	272.586	312.861	278.331	2398.41	2407.11	2425.11	2400.95
C18_positive	ZINC57986567	1-Methylcyclohexene	1-甲基环己烯	Others	其他	Hydrocarbon derivatives	烃衍生物	C7H12	119.086	96.0939	5.4855	M+Na	0.25105	4	0.7438	rp	591-49-1	11574	-	-	-	1449.12	1709.87	1100.49	1524.16	691.821	875.433	1199.46	875.865	305.118	1637.93	793.183	700.541	1012.16	1349.83	790.069	962.365	751.7	582.654	1080.33	455.388	1276.93	1045.75	295.759	1186.51	1496.53	1496.28	1582.89	1585.22
C18_positive	MW0146707	Bethanechol chloride	氯化贝胆碱	Aldehyde,Ketones,Esters	醛、酮、酯类	Esters	酯类	C7H17ClN2O2	219.087	196.098	5.2124	M+Na	4.639	4	0.6465	rp	590-63-6	11548	HMDB0015154	-	C08202	2150.4	1989.38	2347.83	2401.04	2013.83	2093.57	2202.5	2106.71	2608.48	2116	2136.49	1700.4	1493.57	2258.19	2220.75	1636.23	2077.61	1690.55	1888.35	2237.38	1327.14	2024.33	2237.65	1962.89	1890.1	2031.31	1916.5	1628.74
C18_positive	MW0009050	Neostigmine	新斯的明	Benzene and substituted derivatives	苯及其衍生物	Benzene and substituted derivatives	苯及其衍生物	C12H19N2O2+	246.126	223.145	0.5499	M+Na	6.63225	4	0.6089	rp	59-99-4	4456	HMDB0015472	-	C07258	1893.51	1781.77	1669.61	1628.46	1989.2	1798.97	1549.19	1866.88	2530.43	1699.76	2234.48	1690.32	2143.02	1973.33	2415.26	2089.77	2330.46	2869.88	3176.83	2416.72	2917.47	3716.17	2995.19	2543.08	2954.9	2998.34	3024.53	3030.75
C18_positive	MW0114263	Digalacturonate	二半乳糖醛酸	Organic acid and Its derivatives	有机酸及其衍生物	Organic acid and Its derivatives	有机酸及其衍生物	C12H18O13	415.037	370.075	10.4065	M-H+2Na	21.2988	3	0.5716	rp	5894-59-7	439694	HMDB0039721	63147	C02273	14.128	37.916	24.489	22.242	23.478	36.114	27.947	27.728	60.71	44.215	13.122	31.632	14.302	53.543	16.817	24.774	19.01	9.459	8.628	9.752	61.541	33.562	29.776	69.124	198.69	192.915	180.332	191.594
C18_positive	MW0112819	3-Hexanone	3-己酮	Aldehyde,Ketones,Esters	醛、酮、酯类	Ketones	酮类	C6H12O	201.185	100.089	7.0562	2M+H	0.604	3	0.6382	rp	589-38-8	11509	HMDB0000753	5721	-	1.676	1.871	0.278	0.075	1.231	0.209	2.314	0.661	0.061	1.806	1.829	2.049	2.814	12.885	0.165	1.773	1.321	1.288	1.832	0.327	1.859	0.113	0.578	0.171	75.196	77.282	78.28	77.625
C18_positive	MW0137945	Dichamanetin	双色胺	Heterocyclic compounds	杂环化合物	Heterocyclic compounds	杂环化合物	C29H24O6	235.084	468.157	5.2124	M+2H	4.88855	4	0.6416	rp	58779-09-2	181193	-	-	-	6907.02	6907.48	6903.13	8634.75	6981.2	7509.82	7359.33	7847.2	9060.14	7592.22	8401.44	7820.35	6408.89	8018.85	5908.83	5592.97	6525.11	6078.2	7559.99	6940.14	7466.26	7387.97	7549.14	7808.81	6914.28	6950.86	6902.64	6901.66
C18_positive	MW0106823	L-Glutaminyl-L-serine	Gln Ser	Amino acid and Its metabolites	氨基酸及其代谢物	Small Peptide	小肽	C8H15N3O5	234.113	233.101	5.8217	M+H	10.8247	2	0.7358	rp	5875-40-1	54357903	HMDB0028806	-	-	10678.1	10169.8	10519.4	11359.2	10442.6	10595.7	11614	11603.9	13047.6	11543.5	11862.7	11281.8	9734.27	12571.4	8271.64	8045.17	10058.9	9223.71	11105.6	10418.6	10152.4	11623.1	11353.9	11265.2	9939.79	9617.16	9959.41	9973.39
C18_positive	MW0108964	O,O-Diethyl hydrogen thiophosphate	O，O-二乙基硫代磷酸酯	Aldehyde,Ketones,Esters	醛、酮、酯类	Esters	酯类	C4H11O3PS	214.988	170.017	1.2281	M-H+2Na	1.51928	2	0.7593	rp	5871-17-0	655	HMDB0001460	6256	C06607	50140.9	54342.2	52567.1	67517.6	56228.4	55931.9	44018	37994.1	52036	58448.8	61418.7	49028.6	60833.4	54318.7	49044.8	56272.2	54518.8	53678.5	64467.4	36268.6	56800.2	56332.3	52824.6	59642.8	50259.9	49828.1	50281.3	49911.6
C18_positive	MW0109014	(2S,3R)-tert-Butyl 2-amino-3-(tert-butoxy)butanoate	(2S,3R)-2-氨基-3-(叔丁氧基)丁酸叔丁酯	Amino acid and Its metabolites	氨基酸及其代谢物	Amino acid derivatives	氨基酸衍生物	C12H25NO3	232.191	231.183	5.9226	M+H	8.8905	4	0.5706	rp	5854-78-4	7018832	-	-	-	1647.93	1297.65	1449.89	1834.71	926.64	1634.39	891.328	156.948	805.261	1178.03	155.717	720.82	1927.53	2245.9	1676.1	1571.97	1281.26	1297.16	1698.11	1183.11	1927.7	673.623	1163.05	2004.17	852.666	1121.05	1139.02	1219.62
C18_positive	MW0137679	Cinromide	辛罗胺	Alcohol and amines	醇、胺类	Amines	胺类	C11H12BrNO	254.016	253.01	5.6991	M+H	2.20405	2	0.7687	rp	58473-74-8 | 69449-19-0	688145	-	-	-	15346.2	12578.3	13636.6	17196.6	13236.5	14093.9	14463.6	15089.1	18240.9	13463.7	13930.9	13944.4	16073.4	17691.2	13922.1	14117.5	15971.5	13212.9	17286.2	14107.6	15616.1	16335.6	16404.2	17061.6	13821.4	15002.1	14642.8	14653.1
C18_positive	MW0105941	Asp-Asp	Asp Asp	Amino acid and Its metabolites	氨基酸及其代谢物	Small Peptide	小肽	C8H12N2O7	357.05	248.065	9.1166	M+H	13.8717	2	0.6369	rp	58471-53-7	471583	-	65058	-	437774	431212	395667	495198	443802	427161	275.219	457971	498955	57.019	466837	441998	73.446	1588.98	262.151	426282	445097	299.13	486494	457087	457885	446709	1471.62	921.257	31545.1	32360.5	32988.6	32988.5
C18_positive	MW0103888	Diaminopimelic acid	二氨基庚二酸	Organic acid and Its derivatives	有机酸及其衍生物	Organic acid and Its derivatives	有机酸及其衍生物	C7H14N2O4	267.007	190.095	5.7298	M-H+2K	18.9951	2	0.6429	rp	583-93-7	439283	HMDB0001370	352	C00666	1921.15	3651.51	3619.09	3196.86	2105.94	4944.5	2853.24	3862.99	3954.63	6772.94	4308.69	5569.84	4411.32	4153.25	3926.9	3528.41	5049.87	1858.95	5174.6	1653.77	2690.33	3534.02	5891.8	3230.99	4117.46	3916.48	3900.18	3684.23
C18_positive	MW0112223	2-Methylcyclohexanone	2-甲基环己酮	Aldehyde,Ketones,Esters	醛、酮、酯类	Ketones	酮类	C7H12O	113.096	112.089	3.2262	M+H	10.4622	4	0.5463	rp	583-60-8	11419	HMDB0031539	-	-	19678.2	19114.8	22301.3	23517.5	19005	16283.8	15084.6	17189.1	20366.3	18513.7	18323.5	17068.6	25136.1	25742.6	17595.5	16213.9	17017.1	16552.5	17555.9	16480.9	19980.4	21456.3	24448.8	21807	16627.9	16488.1	16619.4	16414.3
C18_positive	MW0007242	Gingerol	生姜油	Benzene and substituted derivatives	苯及其衍生物	Phenolics	苯酚类	C17H26O4	371.102	294.183	10.7482	M-H+2K	2.24573	2	0.6382	rp	58253-27-3	3473	HMDB0005783	-	C10462	583.867	564.587	706.14	830.008	695.027	777.243	1019.25	809.601	755.808	505.594	175.049	293.715	444.887	2005.97	1727.73	265.086	412.1	540.881	576.402	550.569	2340.96	443.937	1343.7	1074.33	13658.2	13549.7	13363.1	13559.6
C18_positive	ZINC85492990	Delphinidin 3-glucosylglucoside	翠雀素-3-二葡萄糖苷	Flavonoids	黄酮	Anthocyanidins	花青素	C27H31O17+	672.147	627.156	4.133	M+2Na-H	25.3124	4	0.641	rp	58213-36-8	5316496	HMDB0041594	-	-	3794.94	3957.61	3440.42	4079.35	4018.22	3878.48	4220.64	4256.01	4930.44	4542.61	4818.46	4087.34	3573.05	4470.47	3474.57	3545.8	4014.93	3096.53	4264.73	3695.8	3671.02	4070.7	4182.07	4321.14	3675.54	3844.82	3701.89	3534.31
C18_positive	MW0112865	Isovalerophenone	3-甲基-1-苯基-1-丁酮	Aldehyde,Ketones,Esters	醛、酮、酯类	Ketones	酮类	C11H14O	163.113	162.105	6.4166	M+H	0.819374	2	0.7593	rp	582-62-7	68493	-	265084	-	9123.94	4615.11	9465.55	16529.5	7628.83	14826.8	15637.9	11353.9	11627.5	8271.89	7325.72	3247.61	10686.1	14029.9	13079	6908.76	1687.48	7957.92	3339.2	5884.78	4903.28	2506.39	3851.57	10531	5014.76	5181.05	4673.7	5060.4
C18_positive	MW0169291	Idebenone	艾地苯醌	Benzene and substituted derivatives	苯及其衍生物	Benzene and substituted derivatives	苯及其衍生物	C19H30O5	321.198	338.209	6.4167	M+H-H2O	24.0207	2	0.617	rp	58186-27-9	3686	-	757	-	10.168	5.209	0.814	4.646	7.87	2.544	18.868	4.375	7.603	1.702	6.596	11.483	3.277	2.891	3.564	4.598	4.001	9.469	16.571	19.494	14.645	16.429	18.878	12.704	253.823	171.904	229.253	235.68
C18_positive	MEDL01843	Matairesinol	Matairesinol	Benzene and substituted derivatives	苯及其衍生物	Benzene and substituted derivatives	苯及其衍生物	C20H22O6	359.147	358.142	8.7815	M+H	0.144666	2	0.7236	rp	580-72-3	119205	HMDB0035698	-	C10682	2291.99	2423.55	2208.66	2659.9	2719.76	3324.93	2994.55	4897.48	3411.44	3155.57	3199.32	3286.34	2775.14	2518.86	2265.3	2121.74	2405.94	2328.35	3070.69	2538.5	3336.02	2980.22	3234.26	2825.19	2750.92	2841.01	2807.28	2663.7
C18_positive	MW0103706	Uridine-5'-diphosphate	尿苷-5'-二磷酸	Nucleotide and Its metabolites	核苷酸及其代谢物	Nucleotide and Its metabolites	核苷酸及其代谢物	C9H14N2O12P2	448.979	404.002	0.6718	M-H+2Na	14.5059	2	0.647	rp	58-98-0	6031	HMDB0000295	-	C00015	413731	374781	356660	406327	384038	364118	581084	585594	592019	579408	610856	606302	244736	307133	283955	285185	318353	243682	590391	398277	583636	551866	574637	584596	445806	449558	444019	436707
C18_positive	MW0123307	Chlorothiazide	氯噻嗪	Others	其他	Medicine	药物	C7H6ClN3O4S2	253.946	294.949	0.611	M+H-COCH2	2.93775	4	0.6817	rp	58-94-6	2720	HMDB0015018	-	C07461	1386.31	1565.75	773.944	1869.47	1788.07	1909.9	1521.23	1003.66	1890.51	1973.28	1744.11	1201.17	1519.02	2390.21	1281.25	1681.75	1067.3	1431.5	2067.62	2048.13	1928.22	2079.57	1775.11	1820.83	1543.31	1405.13	1486.12	1518.45
C18_positive	MW0168692	Adenosine	腺苷	Nucleotide and Its metabolites	核苷酸及其代谢物	Nucleotide and Its metabolites	核苷酸及其代谢物	C10H13N5O4	268.104	267.097	1.9433	M+H	0.0761424	1	0.989	rp	58-61-7	60961	HMDB0000050	86	C00212	60309.7	52633.7	42355.6	45654	46439.7	48078	63625.9	71218	60308	58629.5	33402.4	29144.1	18144.3	10938.2	16918.9	12448.1	12304.4	23968.7	63831.9	79934.5	97667	59463.1	77894.9	58263.6	37783.3	38132.8	37730.5	37269.9
C18_positive	MW0111010	Dipyridamole	双嘧达莫	Heterocyclic compounds	杂环化合物	Heterocyclic compounds	杂环化合物	C24H40N8O4	505.34	504.317	7.7832	M+H	24.2324	2	0.7855	rp	58-32-2	3108	HMDB0015110	-	-	33909.6	33204.1	29126.8	36008.3	28625.5	34533.6	2789.69	11.249	7.418	3375.29	3148.92	2924.64	15865.2	15197.9	16185.3	17126.5	15931.8	18841.1	5607.07	4214.44	9.838	2.499	2939.1	2918.03	4880.2	4905.32	4881.33	4958.29
C18_positive	MW0147056	(13R,17R)-17-[(1R,2S)-1,2-dihydroxyheptyl]-1,5,10-triazabicyclo[11.4.0]heptadec-15-en-11-one	(13R,17R)-17-[(1R,2S)-1,2-二羟基庚基]-1,5,10-三氮杂双环[11.4.0]heptadec-15-en-11-one	Heterocyclic compounds	杂环化合物	Heterocyclic compounds	杂环化合物	C21H39N3O3	382.301	381.299	8.9349	M+H	14.9271	3	0.755	rp	57682-64-1	100419	-	-	-	137899	232993	209234	179972	130673	146004	137682	155102	298131	162397	192528	149943	108009	154401	184018	150256	214523	143373	152751	163744	209594	173694	242408	174792	112678	111519	97121.1	95662.2
C18_positive	MW0008567	1,1-Dicyclohexyl-3-phenylurea	1,1-二环己基-3-苯基脲	Benzene and substituted derivatives	苯及其衍生物	Benzene and substituted derivatives	苯及其衍生物	C19H28N2O	339.183	300.22	12.2674	M+K	0.409	4	0.7399	rp	5765-54-8	280360	-	-	-	4542.66	3132.03	3673.24	3925.68	2801.47	2703.73	1635.18	970.763	1581.06	2373.87	2892	2752.1	4655.92	5830.85	3297.95	3405.39	4236.86	4025.84	1485.65	3433.2	921.822	844.042	1192.42	668.951	4707.77	5284.69	4898.72	3750.07
C18_positive	MW0169190	Fraxetin	弗拉西丁	Heterocyclic compounds	杂环化合物	Heterocyclic compounds	杂环化合物	C10H8O5	226.062	208.037	8.4442	M+NH4	22.9835	2	0.6042	rp	574-84-5	5273569	-	44399	C09265	5.49	4.574	10.213	7.77	4.277	3.647	7.034	5.539	7.778	5.806	5.211	5.624	7.036	37.918	4.614	4.685	3.645	3.257	6.775	5.686	2.289	2.727	17.514	10.567	209.776	212.536	208.455	212.623
C18_positive	MW0126353	Pyroquilon	吡喹酮	Aldehyde,Ketones,Esters	醛、酮、酯类	Ketones	酮类	C11H11NO	220.094	173.084	5.7298	M+HCOO+2H	6.40526	2	0.7337	rp	57369-32-1	91665	HMDB0037113	-	C18487	36286.6	32196.4	35149.9	41599.8	35656.2	37396.1	38327.9	37405	42408.7	38477.3	35606.2	36551.8	41201.4	44502.9	33973.6	33781	37358.1	35740	41894.4	35630.3	39062.9	42059.9	49551.1	44549.7	37198.3	38668.3	38051.5	37741
C18_positive	MW0129840	13-Methyloxacyclotetradecan-2-one	13-甲基氧杂环十四烷-2-酮	Alcohol and amines	醇、胺类	Alcohols	醇类	C14H26O2	227.201	226.193	8.5216	M+H	1.75251	3	0.7162	rp	57092-32-7	534607	HMDB0031073	-	-	2.889	1.207	1.198	2.383	0.548	1.144	3.165	2.874	2.003	0.274	1.352	2.722	1.646	2.545	1.511	0.992	0.072	1.026	1.699	1.222	2.495	1.519	1.687	2.315	88.284	88.123	85.523	90.276
C18_positive	MW0168620	Dihydro-5-pentyl-2(3H)-furanone	二氢-5-戊基-2(3H)-呋喃酮	Aldehyde,Ketones,Esters	醛、酮、酯类	Ketones	酮类	C9H16O2	121.101	156.115	3.6921	M+H-2H2O	0.055465	2	0.6797	rp	57084-16-9	7710	HMDB0031531	-	-	0.659	0.694	0.872	2.135	0.287	0.508	0.544	1.942	0.309	1.029	0.702	0.739	1.061	5.288	0.689	0.743	0.507	0.168	0.381	0.393	0.192	0.643	1.026	0.987	60.217	59.789	59.87	59.719
C18_positive	MW0127498	Isomethiozin	异硫辛	Others	其他	Others	其他	C12H20N4OS	269.144	268.136	4.5004	M+H	3.045	4	0.6794	rp	57052-04-7	9576097	-	-	C19107	2788.35	2422.65	2163.91	2762.88	2654.08	2615.1	2617.43	2820.74	3222.04	2973.68	2578.82	2784.91	3128.1	3303.96	2202.97	2857.94	3062.53	2172.82	2980	2536.67	2658.31	3101.11	3309.55	2990.35	3025.85	3281.02	3141.22	3182.39
C18_positive	MEDP0428	Cholesterol	胆固醇	Hormones and hormone related compounds	激素及激素相关物质	Hormones and hormone related compounds	激素及激素相关物质	C27H46O	369.352	386.355	8.5205	M+H-H2O	2.13791	1	0.8336	rp	57-88-5	5997	HMDB0000067	-	C00187	51585.8	55627.4	81930.6	61422.5	104330	52561.4	70113.9	45971.8	71120.3	119957	65535.5	35968.6	34856.2	83514.1	113733	55538.4	121014	46173.8	45628.5	50037.1	63501.8	52424.2	42388.6	102.892	52003.2	54623.6	53556.5	51966.7
C18_positive	MW0009794	Sulfamethazine	磺胺二甲嘧啶	Benzene and substituted derivatives	苯及其衍生物	Benzene and substituted derivatives	苯及其衍生物	C12H14N4O2S	279.091	278.084	6.3191	M+H	0.922049	2	0.7239	rp	57-68-1	5327	HMDB0015522	-	C19530	515.637	804.304	1197	986.383	1149.25	1197.25	420.783	448.301	305.75	351.783	301.604	397.795	1887.18	1732.89	1986.12	877.99	1060.04	987.74	1411.93	862.746	1692.18	1749.19	1045.91	1493.66	3090.68	3288.4	3087.12	3764.15
C18_positive	MEDL02396	Sucrose	蔗糖	Carbohydrates and Its metabolites	碳水化合物及其代谢物	Sugars	糖类	C12H22O11	365.106	342.116	0.7336	M+Na	0.349408	1	0.7892	rp	57-50-1	5988	HMDB0000258	-	C00089	57242.8	43911.3	33841	48828	56050.7	44648.9	41041.7	45811.1	80535.3	41448.7	44955.1	32405.6	45096.3	54931.8	62189.5	45113.3	84530	91739.2	65458.1	90014.3	34123.3	39122.5	39127.2	39143	71025.1	75641.2	73779	73139
C18_positive	MEDN0305	Creatine	肌酸	Organic acid and Its derivatives	有机酸及其衍生物	Organic acid and Its derivatives	有机酸及其衍生物	C4H9N3O2	132.077	131.07	0.7625	M+H	0.35015	1	0.9366	rp	57-00-1	586	HMDB0000064	7	C00300	283985	297785	279025	325152	218142	278218	84730.3	74489.9	39574.3	76562.7	59519.4	80920.6	208159	227774	189674	187408	72216.1	50281.6	131649	42586.2	185593	172578	175104	173697	119844	121052	120306	120338
C18_positive	MW0169518	N-Acetylputrescine	N-乙酰腐胺	Alcohol and amines	醇、胺类	Amines	胺类	C6H14N2O	207.032	130.111	9.6847	M-H+2K	7.75685	2	0.5424	rp	5699-41-2	122356	HMDB0002064	3252	C02714	2.422	0.551	5.671	4.224	2.309	7.07	11.037	8.84	3.828	2.183	3.481	4.036	6.352	43.376	2.179	3.004	3.651	2.048	2.589	0.918	0.601	4.5	19.184	15.247	393.878	389.761	380.683	387.311
C18_positive	MW0017077	5alpha-Cholestan-3-one	5α-胆甾烷-3-酮	Hormones and hormone related compounds	激素及激素相关物质	Hormones and hormone related compounds	激素及激素相关物质	C27H46O	369.352	386.355	11.9909	M+H-H2O	1.21606	2	0.9368	rp	566-88-1	92128	HMDB0000871	5832	C03238	43132	41343.3	45435	68264.4	51407.9	46718.8	49755.5	76387.3	74279.9	61599.5	43687.8	47283.3	42526.7	74146.1	56568.7	30938.5	95.953	48343.3	53780.3	49207.1	59253.5	34062.1	367.568	70707.3	59301.8	57679.3	57725.1	58828.1
C18_positive	MW0015215	7-Ketocholesterol	7-酮胆固醇	Hormones and hormone related compounds	激素及激素相关物质	Hormones and hormone related compounds	激素及激素相关物质	C27H44O2	401.342	400.334	11.4146	M+H	2.17118	4	0.6986	rp	566-28-9	91474	HMDB0000501	3901	-	2677.65	2815.36	2486.82	3017.28	2098.12	2737.44	1972.58	1904.85	3620.66	2041.41	2216.92	1794.07	1800.69	1866.02	1433.44	3144.87	1884.67	1147.71	1564.77	1119.49	1853.95	2745.95	2253.93	2372.36	2370.21	2281.65	2338.57	2330.22
C18_positive	MW0010698	Bornyl acetate	乙酸冰片酯	Terpenoids	萜类	Terpenoids	萜类	C12H20O2	197.153	196.146	6.5764	M+H	0.825	4	0.7298	rp	5655-61-8	6448	HMDB0040397	-	-	2.284	0.384	0.567	2.21	2.056	3.048	0.802	1.684	2.582	1.475	0.447	0.911	0.98	6.706	1.002	1.405	1.09	1.422	0.342	1.906	1.849	0.252	4.801	1.223	85.459	86.163	85.326	85.345
C18_positive	MW0105132	2-Amino-3-phosphonopropionic acid	2-氨基-3-膦酰基丙酸酯	Organic acid and Its derivatives	有机酸及其衍生物	Organic acid and Its derivatives	有机酸及其衍生物	C3H8NO5P	339.043	169.014	6.7536	2M+H	20.1919	2	0.6795	rp	5652-28-8	3857	HMDB0000370	5359	C05672	10169.6	9806.68	10631.4	12767.8	9818.32	10255.9	7983.52	9392.81	12506.1	10221.1	9773.96	8271.99	8751.5	13359.3	8415.18	8157.69	9922.94	10242.8	9019.86	11749.6	8111.95	7991.08	9380.68	10173.9	16649.3	16888.3	16760.6	16734
C18_positive	MW0169369	L-Lysine	L-赖氨酸	Amino acid and Its metabolites	氨基酸及其代谢物	Amino acids	氨基酸	C6H14N2O2	147.113	146.106	0.611	M+H	1.55135	1	0.9442	rp	56-87-1	5962	HMDB0000182	5200	C00047	1469.07	1587.59	1571.53	1527.61	878.476	768.952	2234.97	1584.01	1038.37	2190.6	2288.2	2197.64	1844.66	2028.49	992.958	1705.68	1021.43	1429.27	986.652	576.199	2231.08	1593.13	1935.04	1574.33	4969.97	5111.56	5112.72	4857.53
C18_positive	FDATN01488	L-Glutamic acid	L-谷氨酸	Amino acid and Its metabolites	氨基酸及其代谢物	Amino acids	氨基酸	C5H9NO4	130.05	147.053	0.7474	M+H-H2O	0.637542	1	0.9446	rp	56-86-0	33032	HMDB0000148	-	C00025	17358.6	18453.2	17899	19081.3	13094.2	17857.2	60633	51898.9	30573	52951	48360.4	55749.9	23578.8	24692.6	19942.8	20316.2	10872.2	5560.53	58016.3	18215.1	77075.9	64705.5	74923.4	76093.7	52144	52085.1	52214.2	52129.1
C18_positive	MW0120644	4-Nitroquinoline N-oxide	4-硝基喹啉1-氧化物	Heterocyclic compounds	杂环化合物	Heterocyclic compounds	杂环化合物	C9H6N2O3	191.048	190.038	1.1528	M+H	5.69351	2	0.7141	rp	56-57-5	5955	-	24073	C03474	66.645	28.112	258.115	60.913	148.379	1563.51	291.134	1835.59	2339.74	2226.06	1978.16	1170.22	45.692	79.462	146.759	89.073	269.366	191.048	2392.48	5385.21	824.454	1807.82	2309.04	2122.12	3315.88	3309.91	3368.48	3169.02
C18_positive	MW0105531	L-Alanine	L-丙氨酸	Amino acid and Its metabolites	氨基酸及其代谢物	Amino acids	氨基酸	C3H7NO2	134.027	89.0477	0.823	M-H+2Na	18.6163	1	0.746	rp	56-41-7	5950	HMDB0000161	-	C00041	884.628	1703.56	1796.98	956.646	907.901	872.975	4295.61	3266.21	26.785	2779.37	3344.1	1709	1132.15	764.241	1930.66	1308.97	1436.28	1217.14	3397.1	1658.37	1689.27	2891.73	3600.76	3938.74	2522.43	2716.3	2831.17	2766.96
C18_positive	MW0156457	2-(2-Aminoethyl)isothiourea dihydrobromide	2-(2-氨基乙基)异硫脲二氢溴酸盐	Alcohol and amines	醇、胺类	Polyamines	多胺	C3H11Br2N3S	265.887	280.902	0.958	M+H-CH4	9.8705	4	0.5552	rp	56-10-0 | 927-71-9	5940	-	64864	-	10484.3	12158.5	14454.7	12500.5	14482.3	15155.4	7877.9	9120.18	12896.8	12428.6	12736.7	12731.5	16108.6	12111.7	15333.7	7981.19	13359.7	10574	11217.9	9534.91	5165.79	12194	8526	12585.9	10159.7	10364.7	9541.61	9982.73
C18_positive	MW0125165	Methylthiouracil	甲基硫氧嘧啶	Heterocyclic compounds	杂环化合物	Heterocyclic compounds	杂环化合物	C5H6N2OS	184.046	142.02	0.5499	M+CH3CN+H	21.1512	2	0.6489	rp	56-04-2 | 1123-10-0 | 91795-77-6	667493	-	44256	C19265	8379.53	8032.84	7888.49	8853.42	9880.99	8993.55	9230.73	6427.69	12532	11003.7	11011.2	9700.68	9465.72	9901.26	12687	10881.1	12204.5	15453.4	18925.3	15881.8	18237	16606.3	17719.8	17256.8	13556.1	13528.3	13620.9	13494.6
C18_positive	MW0156255	1-[(4-Amino-2-methylpyrimidin-5-yl)methyl]-3-(2-hydroxyethyl)-2-methylpyridinium	乙胺; 1-(4-氨基-2-甲基嘧啶-5-基甲基)-3-(2-羟乙基)-2-甲基吡啶鎓	Heterocyclic compounds	杂环化合物	Heterocyclic compounds	杂环化合物	C14H19N4O+	242.15	259.156	1.8031	M+H-H2O	2.21575	4	0.6976	rp	5593-78-2	10803	-	-	C21111	1.12451e+07	1.10765e+07	1.01635e+07	1.27201e+07	1.13999e+07	1.09724e+07	1.0845e+07	1.17638e+07	1.28174e+07	1.17997e+07	1.19916e+07	1.13535e+07	1.22722e+07	1.35233e+07	1.09628e+07	1.09499e+07	1.14332e+07	1.06471e+07	1.24965e+07	1.17411e+07	1.17617e+07	1.14746e+07	1.06565e+07	1.1474e+07	32416.9	36564.2	34557.1	28956.1
C18_positive	MW0114019	Buflomedil	丁苯地尔	Heterocyclic compounds	杂环化合物	Heterocyclic compounds	杂环化合物	C17H25NO4	352.151	307.178	2.7501	M+2Na-H	1.604	4	0.9615	rp	55837-25-7	2467	-	-	-	1.106	288.983	248.251	261.266	420.64	327.63	1.14	1.506	1.905	9.177	4.422	10.199	254.611	342.713	6.082	0.817	233.95	5.405	263.491	11.694	1.129	6.778	213.882	3.113	905.356	963.934	983.393	962.224
C18_positive	MW0127081	Octamethylcyclotetrasiloxane	八甲基环四硅氧烷	Heterocyclic compounds	杂环化合物	Heterocyclic compounds	杂环化合物	C8H24O4Si4	151.025	296.075	4.4094	M+H-C6H10O4	0.4195	4	0.7396	rp	556-67-2 | 25037-57-4	11169	-	-	-	1919.26	1439.14	1890.17	2145.48	1506.51	1761.81	1757.39	1782.39	1950.94	1006.48	846.515	1561.5	818.902	1903.97	1558.3	1393.64	1822.74	1439.93	1758.94	1525.9	1856.44	1907.44	2300.03	1318.61	2547.44	2659.64	2681.2	2690.7
C18_positive	MEDP1685	Phytosphingosine	植物鞘氨醇	SL	鞘脂类	SPH	鞘氨醇	C18H39NO3	318.301	317.293	5.8825	M+H	0.195812	1	0.723	rp	554-62-1	122121	HMDB0004610	7066	C12144	303497	245230	272226	295343	301804	298699	234430	444076	394095	296779	218798	242855	320318	376366	371715	300873	296773	238366	402873	337833	341711	373008	352169	407730	347909	344367	346851	350186
C18_positive	MW0154487	N-(1,2-Diphenylethyl)nicotinamide	N-(1,2-二苯乙基)烟酰胺	Alcohol and amines	醇、胺类	Amines	胺类	C20H18N2O	261.145	302.142	1.2432	M+H-COCH2	2.28325	4	0.9461	rp	553-06-0	3033975	-	-	C17729	34.131	13.413	19.339	41.421	21.838	43.645	41.659	76.636	88.313	51.357	152.696	85.456	12.651	51.91	33.963	39.222	54.161	38.211	87.965	158.099	82.097	31.235	70.634	63.615	2585.62	2608.34	2636.45	2585.66
C18_positive	MW0139812	Thalsimine	塔尔西明	Heterocyclic compounds	杂环化合物	Heterocyclic compounds	杂环化合物	C38H40N2O7	637.306	636.284	9.3487	M+H	17.2263	2	0.8877	rp	5525-36-0	362568	-	-	C09661	2129.71	1177.73	4970.16	8014.9	3048.35	7398.84	5730.02	1247.73	10320.9	9189.33	4200.1	11908	6587.61	2646.45	1408.56	2726.47	3974.68	2970.88	3476.8	3253.68	2972.04	3850.76	3481.27	4282.65	7846.65	7460.9	6499.91	7810.77
C18_positive	MW0015222	7-Methylxanthine	7-甲基黄嘌呤	Nucleotide and Its metabolites	核苷酸及其代谢物	Nucleotide and Its metabolites	核苷酸及其代谢物	C6H6N4O2	167.055	166.049	4.4094	M+H	1.69686	2	0.7248	rp	552-62-5	68374	HMDB0001991	-	C16353	776.858	623.016	944.259	971.253	586.478	604.082	667.941	808.338	818.682	737.599	794.42	733.415	953.815	1440.76	669.752	606.37	753.015	615.428	668.39	614.563	830.056	661.383	1216.59	1135.31	2158.41	2220.34	2162.43	2167.79
C18_positive	MEDP1645	Benzamide	苯甲酰胺	Alcohol and amines	醇、胺类	Amines	胺类	C7H7NO	163.091	121.053	2.4767	M+CH3CN+H	11.5215	1	0.6222	rp	55-21-0	2331	HMDB0004461	-	C09815	6854.31	5489.62	5360.74	6652.21	5891.11	6004.65	5783.47	4345.22	6010.49	5671.07	5150.2	3108.59	7091.71	8195.56	6227.09	5205.67	5708.16	4525.24	6982.35	5365.9	7232.82	6621.09	7966.82	7401.95	5403.74	5552.89	5348.34	5542.87
C18_positive	MW0126521	Sclerotiorin	硬化蛋白	Heterocyclic compounds	杂环化合物	Heterocyclic compounds	杂环化合物	C21H23ClO5	391.129	390.123	6.1121	M+H	4.22386	2	0.8285	rp	549-23-5	6436015	-	62989	-	9770.17	9403.4	9507.3	10981.7	9814.54	8572.25	5683.63	6395.45	8464.75	5763.49	7338.97	3050.69	7835.24	10531	7610.86	8169.54	8813.42	8683.71	9041.9	8473.5	9457.06	9223.26	8116.15	8972.37	8655.36	8914.43	8477.23	8419.23
C18_positive	MW0003256	2-Methylbenzhydrol	邻甲基苯酚	Benzene and substituted derivatives	苯及其衍生物	Benzene and substituted derivatives	苯及其衍生物	C14H14O	181.102	198.105	2.4767	M+H-H2O	1.19332	2	0.7214	rp	5472-13-9	95659	-	1669	-	5878.49	4898.4	4433.42	6069.08	4500.01	4696.22	5212.86	4985.17	5877.36	5070.89	4977.9	5336.97	5938.05	7526.08	4984.73	5310.26	5095.15	4479.34	6737.34	5535.89	5932.25	6794.65	7600.73	6295.49	5560.24	5609.65	5501.15	5470.92
C18_positive	MW0148596	Disenecionyl cis-khellactone	二烯丙基顺-凯内酯	Aldehyde,Ketones,Esters	醛、酮、酯类	Ketones	酮类	C24H26O7	465.13	426.168	10.7488	M+K	9.04182	4	0.8181	rp	54676-88-9	442129	-	-	C09261	181255	174971	159980	200595	179406	172394	170697	296.987	201729	185721	188347	178053	197302	353.521	178229	173529	179947	167941	196691	184802	185125	180606	348.692	433.809	35627.5	34876.5	35483.8	35164.5
C18_positive	MW0115875	2-Hydrazinyl-4,6-di(piperidin-1-yl)-1,3,5-triazine	2-肼基-4,6-二(哌啶-1-基)-1,3,5-三嗪	Aldehyde,Ketones,Esters	醛、酮、酯类	Ketones	酮类	C13H23N7	300.185	277.202	9.6998	M+Na	6.2345	4	0.6161	rp	54589-69-4	255400	-	-	-	2353.75	2412.44	997.895	1568.51	2114.19	1670.97	1574.23	3356.65	3349.53	2812.93	2790.18	2594.37	2560.94	2141	2354.42	1659.1	2494.34	2790.11	3067.53	1879.98	2441.82	3379.23	3719.4	3304.51	1946.83	2150.38	1986.75	2107.18
C18_positive	MW0118410	2-Chloro-4-iodonicotinic acid	2-氯-4-碘烟酸	Organic acid and Its derivatives	有机酸及其衍生物	Organic acid and Its derivatives	有机酸及其衍生物	C6H3ClINO2	267.884	282.89	0.9954	M+H-CH4	10.7397	4	0.5423	rp	544671-78-5	17750174	-	-	-	2128.44	1457.18	1706.86	3064	2093.87	2391.32	1514.33	853.439	1673.11	1325.09	2297.2	1929.02	1940	1963.02	2551.59	1368.85	1800.48	1198.17	1555.77	1471.25	1502.98	1957.44	1617.2	1318.12	2065.76	2049.9	2098.12	1971.87
C18_positive	MEDL02333	Myristoleic acid	肉豆蔻酸	FA	脂肪酰类	Others	其他	C14H26O2	227.201	226.193	9.2069	M+H	0.437478	2	0.6209	rp	544-64-9	5281119	HMDB0002000	6424	C08322	3.906	3.641	4.681	4.023	5.25	7.577	3.437	2.896	8.922	11.322	7.918	3.09	3.291	7.372	4.79	2.164	1.11	7.48	0.567	5.467	3.798	5.43	6.694	10.211	80.927	72.691	78.468	77.971
C18_positive	MEDL02767	Palmitoylethanolamide	棕榈酰乙醇酰胺	FA	脂肪酰类	Others	其他	C18H37NO2	300.29	299.282	4.6825	M+H	3.926	4	0.6609	rp	544-31-0	4671	HMDB0002100	-	C16512	3.6974e+06	3.64198e+06	1186.43	4.1824e+06	467.499	3.60776e+06	1596.07	2949.54	656.686	868.011	3.94286e+06	3.73307e+06	4.02871e+06	4.4465e+06	3.6046e+06	3.60034e+06	3.75925e+06	3.50079e+06	903.402	3.86051e+06	3.86726e+06	3.77286e+06	3.50389e+06	3.77267e+06	29618.9	30649.8	29988	33436.2
C18_positive	MW0149404	Galegine	山羊豆碱	Alcohol and amines	醇、胺类	Polyamines	多胺	C6H13N3	127.111	127.111	3.92	M+	3.01359	2	0.5243	rp	543-83-9	10983	-	-	C08303	215.365	250.395	284.939	392.83	196.204	81.764	282.267	352.289	317.071	257.734	243.787	327.225	260.347	1259.47	192.416	190.687	188.351	195.656	203.664	152.24	283.504	239.846	483.668	324.147	4732.76	5007.78	4817.75	4818.04
C18_positive	MW0105421	Acetylglycine	N-乙酰基甘氨酸	Amino acid and Its metabolites	氨基酸及其代谢物	Amino acid derivatives	氨基酸衍生物	C4H7NO3	117.036	117.043	1.7425	M+	16.092	1	0.6777	rp	543-24-8	10972	HMDB0000532	5517	-	4509.83	4395.07	5551.03	5197.38	4884.85	3810.04	4512.36	4241.54	5269.7	4794.9	4289.6	3570.7	6399.98	6746.42	3181.48	4188.4	4793.13	3797.97	5233.71	3806.81	4740.53	3998.3	6123.18	6440.52	5128.24	5199.06	5079.84	5033.78
C18_positive	MW0103868	2-Amino-3-methyl-1-pyrrolidin-1-YL-butan-1-one	2-Amino-3-methyl-1-pyrrolidin-1-YL-butan-1-one	Aldehyde,Ketones,Esters	醛、酮、酯类	Ketones	酮类	C9H18N2O	171.149	170.142	4.925	M+H	9.78325	4	0.5566	rp	54164-07-7	447256	-	-	-	2108.12	2212.29	1895.47	2257.85	2170.3	1871.57	2213.29	3762.36	2463.98	2296.59	2404.81	1931.52	2573.75	2834.33	1888.81	1576.12	1994.07	2213.68	2557.44	1920.15	2918.29	2572.69	2382.07	2540.09	2153.26	2169.71	2127.8	2184.16
C18_positive	MEDP1995	Isovaleramide	异戊酰胺	Alcohol and amines	醇、胺类	Amines	胺类	C5H11NO	102.091	101.084	13.1992	M+H	0.16	4	0.746	rp	541-46-8	10930	-	-	C75541	2454.43	2104.81	1677.12	2084.26	1035.2	686.835	560.833	654.676	870.347	681.809	595.964	442.171	507.443	861.898	529.515	455.564	3279.95	3856.25	643.641	563.683	1062.13	618.284	564.306	640.179	496.229	518.186	495.503	490.793
C18_positive	MW0123992	ethyl 4-bromo-3,5-dimethyl-1H-pyrrole-2-carboxylate	4-溴-3,5-二甲基-1H-吡咯-2-甲酸乙酯	Aldehyde,Ketones,Esters	醛、酮、酯类	Esters	酯类	C9H12BrNO2	113.963	245.005	13.8361	M+H-C5H8O4	2.1505	4	0.699	rp	5408-07-1	138486	-	-	C13504	1511.97	1858.2	1485.52	1520.22	1792.25	1069.17	1940.81	2667.49	3779.97	2181.86	3449.9	2401.59	2383.18	1725	1188.62	2201.7	1775.44	1528.3	2381.53	1867.16	6104.18	2157.57	2036.89	1954.48	2539.52	2844.41	2804.34	2917.4
C18_positive	MW0014794	5-Hydroxyindoleacetic acid	5-羟基吲哚-3-乙酸	Organic acid and Its derivatives	有机酸及其衍生物	Organic acid and Its derivatives	有机酸及其衍生物	C10H9NO3	192.065	191.058	4.133	M+H	0.1	3	0.9545	rp	54-16-0	1826	HMDB0000763	2975	C05635	9202.34	8255.93	8353.52	9955.46	9080.42	8375.62	8492.09	8952.97	10639.6	9364.05	9307.22	8497.63	9543.39	10903.2	7291.43	8488.59	8787.49	7390.3	9519.11	8714.22	9641.31	9616.08	8911.44	9670.38	8734.86	9002.47	8775.38	8603.42
C18_positive	MW0000002	4-Pentyn-1-ol	4-戊炔-1-醇	Others	其他	Hydrocarbon derivatives	烃衍生物	C5H8O	169.122	84.0575	5.1519	2M+H	0.918933	2	0.7368	rp	5390-04-5 | 390-04-5	79346	-	24049	-	0.391	1.061	1.027	2.026	0.644	0.992	0.501	0.894	1.162	1.056	1.805	1.214	0.757	16.697	0.512	0.275	0.469	0.527	0.942	0.562	0.883	1.337	0.91	1.01	133.969	133.42	133.93	133.072
C18_positive	MW0054600	LPE(16:0/0:0)	LPE(16:0/0:0)	GP	甘油磷脂类	LPE	溶血磷脂酰乙醇胺	C21H44NO7P	454.293	453.286	8.674	M+H	1.10007	1	0.8923	rp	53862-35-4	9547069	HMDB0011503	-	-	16961.7	15796.6	17115.9	16380.5	17894.6	18333.7	34885.5	40924.8	39308.1	32339.4	30187.9	34623.2	17439.7	18503.5	18537.8	18240.6	33799.4	34342.4	31312.7	42884	27145.8	27048.5	24451.9	24925.5	26066.9	26156.9	26168	26170.3
C18_positive	MW0169257	N-(2-Hydroxyethyl)heptadecanamide	N-(2-羟乙基)十七酰胺	Organic acid and Its derivatives	有机酸及其衍生物	Organic acid and Its derivatives	有机酸及其衍生物	C19H39NO2	314.305	313.298	5.7958	M+H	1.97611	2	0.8621	rp	53832-59-0	14455158	-	3717	-	7905.21	7489.4	5542.86	7557.42	12984.5	6385.15	85897.1	43474.3	99526.7	55374.4	43980.3	53829.9	652.508	1308.05	1799.79	906.221	3044.96	2774.08	2674.06	9754.5	587.997	999.887	1495.45	1887.64	13624.4	15501.3	16113.4	15920.5
C18_positive	MW0014514	4-Isopropylbenzyl alcohol	4-异丙基苯甲醇	Alcohol and amines	醇、胺类	Alcohols	醇类	C10H14O	151.112	150.105	8.3229	M+H	6.16275	4	0.6174	rp	536-60-7	325	HMDB0031817	-	C06576	20.322	9.441	11.757	12.41	13.805	13.21	27.976	29.455	27.155	20.289	11.646	19.572	24.135	41.278	22.136	15.014	29.788	28.039	32.222	26.017	13.702	19.853	29.79	27.039	282.079	262.187	260.263	286.844
C18_positive	MW0056884	1-Palmitoyl-2-palmitoleoyl-sn-glycero-3-phosphocholine	PC(16:0/16:1(9Z))	GP	甘油磷脂类	PC	磷脂酰胆碱	C40H78NO8P	732.554	731.547	8.9656	M+H	0.675555	4	0.9834	rp	53595-24-7	6443788	HMDB0007969	-	-	490960	493650	624178	719722	730786	842165	510834	1.50045e+06	757487	470225	445669	470731	390683	338434	341866	306556	5003.28	347241	638455	749489	1.02082e+06	698263	302243	717481	418793	479957	457179	479819
C18_positive	MW0129921	M-Cymene	1-异丙基-3-甲苯	Others	其他	Others	其他	C10H14	181.122	134.11	4.7735	M+HCOO+2H	0.0222499	2	0.6896	rp	535-77-3	10812	HMDB0037051	-	-	1.241	1.721	1.228	2.721	0.798	1.814	1.815	1.546	1.595	1.017	0.697	0.662	1.165	27.519	0.987	1.213	0.882	0.828	0.409	0.928	0.949	1.97	2.356	1.987	151.893	150.295	145.82	150.313
C18_positive	MW0008006	N-(2-chlorophenyl)thiophene-2-sulfonamide	N-(2-氯苯基)噻吩-2-磺酰胺	Benzene and substituted derivatives	苯及其衍生物	Benzene and substituted derivatives	苯及其衍生物	C10H8ClNO2S2	295.957	272.969	0.611	M+Na	1.24425	4	0.7198	rp	53442-36-7	765852	-	-	-	8935.81	10123.9	8441.8	12933.4	9888.67	10457.8	7974.85	5803.8	9274.44	9553.06	9260.5	9341.61	11962.4	14972.7	8384.17	9469.31	10078.4	8847.86	10962.8	8963.47	12434	10302.7	10447.2	10272.3	9157.72	9051.36	9162.87	9241.46
C18_positive	MW0150762	N,N,N-Trimethyl-Histidine	三甲基-L-组氨酸	Heterocyclic compounds	杂环化合物	Heterocyclic compounds	杂环化合物	C9H16N3O2+	199.133	198.124	6.0141	M+H	5.6295	4	0.6273	rp	534-30-5	440727	HMDB0029422	-	C05575	5.563	4.304	4.289	2.278	1.94	3.766	4.113	2.047	1.111	1.516	2.792	1.474	2.693	19.704	5.24	3.475	3.419	5.205	6.766	2.501	2.934	5.47	1.853	13.72	96.082	92.369	96.349	98.072
C18_positive	MW0124399	Butopyronoxyl	丁吡酮	Heterocyclic compounds	杂环化合物	Heterocyclic compounds	杂环化合物	C12H18O4	227.126	226.12	9.5781	M+H	3.773	4	0.914	rp	532-34-3	10760	-	-	C19142	73105.6	112930	115757	128048	98787.9	102635	136027	118214	158630	124826	140140	103285	158488	145200	247205	136612	140123	85476.1	115697	84365.1	68020.9	127813	86233	65207.4	152535	151979	144503	159545
C18_positive	MW0103626	Nicotinamide-Adenine-Dinucleotide	烟酰胺-腺嘌呤-二核苷酸	Nucleotide and Its metabolites	核苷酸及其代谢物	Nucleotide and Its metabolites	核苷酸及其代谢物	C21H28N7O14P2+	665.12	664.117	0.8383	M+H	6.99117	3	0.68	rp	53-84-9 | 151411-04-0 | 121053-11-0 | 65085-09-8 | 865-05-4	5893	HMDB0000902	-	C00003	0.191	189.673	0.996	3.619	190.309	206.229	1425.99	1537.13	1152.89	1133	976.758	1222.66	0.329	2.655	0.257	1.108	0.086	261.703	2592.41	2047.73	2285.03	2430.59	2224.68	2486.47	397.418	376.057	406.216	389.934
C18_positive	MW0169520	NAD+	-	CoEnzyme and vitamins	辅酶和维生素	CoEnzyme and vitamins	辅酶和维生素	C21H27N7O14P2	664.117	663.109	1.1677	M+H	0.572189	3	0.6074	rp	53-84-9	5892	HMDB0000902	-	C00003	7443.5	5760.41	6996.84	9158.5	6452.17	5189.92	148276	164296	158355	183409	124388	136699	3440.68	4066.49	5601.95	3314.71	458.021	4857.23	83693.8	68364.8	72321.7	86267	78948.9	103479	58402.8	55193.1	57322.4	60003.7
C18_positive	MW0055513	Oxandrolone	氧雄龙	Hormones and hormone related compounds	激素及激素相关物质	Hormones and hormone related compounds	激素及激素相关物质	C19H30O3	630.48	306.219	9.563	2M+NH4	10.733	2	0.6884	rp	53-39-4	5878	HMDB0014759	-	C07346	5485.73	4928.72	4905.42	4964.93	5076.73	5428.14	6645.73	8220.03	6570.59	5891.63	5255.04	5677.03	5579.3	6087.26	4488.52	4102.58	5682.56	4908.57	6162.35	4594.91	7919.92	5742.4	6874.38	7389.99	5273.32	5351.13	5351.08	5187.8
C18_positive	MW0120655	1-(Morpholin-4-yl)hexadecan-1-one	1-(吗啉-4-基)hexadecan-1-one	Heterocyclic compounds	杂环化合物	Heterocyclic compounds	杂环化合物	C20H39NO2	155.142	325.298	5.3692	M+2H-NH3	2.301	4	0.6957	rp	5299-68-3	220414	-	-	-	0.861	0.276	0.291	0.173	0.524	0.612	0.711	0.32	0.891	0.447	1.022	0.427	0.178	4.053	0.396	0.463	1.208	0.968	0.274	1.849	0.912	0.25	0.83	0.577	33.065	33.225	33.884	33.564
C18_positive	MW0010416	Santene	圣腾	Others	其他	Hydrocarbon derivatives	烃衍生物	C9H14	123.117	122.11	5.7748	M+H	11.3762	4	0.5331	rp	529-16-8	10720	HMDB0038140	-	-	8.41	7.328	16.32	22.327	6.436	10.705	12.006	18.676	8.785	14.688	12.586	16.033	26.167	29.443	15.042	8.012	6.937	7.42	10.558	8.322	14.191	12.124	12.259	18.208	201.948	216.939	213.073	212.647
C18_positive	MW0049242	Deterrol stearate	去特罗硬脂酸酯	Aldehyde,Ketones,Esters	醛、酮、酯类	Esters	酯类	C33H50O2	226.18	478.381	11.4905	M+2H-C2H4	10.2825	4	0.549	rp	52898-98-3	57473060	HMDB0034578	-	-	416.752	888.958	154.525	233.495	665.609	1645.67	896.924	833.33	5508.46	1622.19	574.697	348.89	1518.31	2280.36	4045.24	710.219	605.223	338.677	791.955	1337.09	1678.03	5114.48	6597.38	2301.59	1023.8	1055.54	815.003	1054.21
C18_positive	MW0103710	Uridine-diphosphate-N-acetylglucosamine	尿苷二磷酸-N-乙酰氨基葡萄糖	Nucleotide and Its metabolites	核苷酸及其代谢物	Nucleotide and Its metabolites	核苷酸及其代谢物	C17H27N3O17P2	630.071	607.082	1.1677	M+Na	0.269811	3	0.9676	rp	528-04-1	445675	HMDB0000290	5281	C00043	1770.31	1419.65	1773.28	2275.96	1917.92	1977.63	4541.05	7966.74	5881.87	5955.47	4612.98	4150.4	1072.8	3609.16	2064.09	1301.87	1538.99	2231.85	5992.02	6512.56	6898.54	6865.72	5337.94	7304.47	3307.55	3077.2	2778.66	3096.1
C18_positive	MW0001625	O-Cymene	邻伞花烃	Benzene and substituted derivatives	苯及其衍生物	Benzene and substituted derivatives	苯及其衍生物	C10H14	181.122	134.11	3.5706	M+HCOO+2H	0.940594	2	0.649	rp	527-84-4	10703	HMDB0037050	-	-	0.322	0.411	0.133	1.131	1.28	0.699	1.134	0.575	0.628	0.192	0.59	0.55	0.777	13.338	0.531	0.353	0.513	0.818	0.456	0.736	0.682	0.255	1.011	0.452	95.575	94.196	89.518	87.806
C18_positive	MW0012825	1-O-Hexadecyl-sn-glycero-3-phosphocholine	PC(O-16:0/0:0)	GP	甘油磷脂类	PC	磷脂酰胆碱	C24H52NO6P	482.36	481.353	9.0271	M+H	1.90074	1	0.9113	rp	52691-62-0 | 97288-09-0	162126	-	-	-	20397.4	16118.1	15652.3	18152	15965.7	19838	7979.27	8232.37	6595	7323.33	5859.81	6413.93	26282.5	30541.6	27642.2	26643.9	37916.2	41922.2	3692.5	5199.78	4106.64	2925.75	3763.23	2880.99	11305.6	11379.8	11579.9	11405
C18_positive	MW0118667	2-Mercaptonicotinonitrile	2-巯基烟腈	Heterocyclic compounds	杂环化合物	Heterocyclic compounds	杂环化合物	C6H4N2S	158.996	136.01	13.761	M+Na	1.203	4	0.7208	rp	52505-45-0	4386419	-	-	-	5039.64	4169.49	22751.7	5307.13	5441.25	4740.42	4128.17	4024.3	4809.71	4892.47	5361.27	4122.62	5513.73	31494.1	3149.45	4354.94	3738.11	4670.41	5251.06	5506.49	4680.37	5953.77	5625.21	5687.34	4139.11	4687.02	4515.72	4599.21
C18_positive	MW0138193	Fraxidin	弗拉西丁	Heterocyclic compounds	杂环化合物	Heterocyclic compounds	杂环化合物	C11H10O5	223.064	222.053	8.429	M+H	10.5293	3	0.7013	rp	525-21-3	3083616	HMDB0132247	-	C17479	1272.99	1156.05	1972.14	2063.07	1158.9	1523.91	2037.68	1760	1737.33	1438.09	1308.01	1408.5	1777.31	5133.69	1162.03	1066.94	1256.15	1265.7	1364.81	1262.19	1423.11	1483.65	3004.17	2509.46	23893.1	23901.8	23852.2	23734.5
C18_positive	MW0006430	Buprenorphine	丁丙诺啡	Benzene and substituted derivatives	苯及其衍生物	Benzene and substituted derivatives	苯及其衍生物	C29H41NO4	935.624	467.304	8.3688	2M+H	14.7212	2	0.5682	rp	52485-79-7	644073	HMDB0015057	-	C08007	12103.1	13555.1	13473.2	13981.4	13314.5	13522	10610.2	15088.7	15603.5	14616.1	14842.7	11757.4	13198.7	13868.4	11333.1	13168	15115.7	12278.6	13556.2	12381.1	13604.3	15051.7	15709.4	16774.7	13873.2	14084.1	13851.5	13788
C18_positive	MW0053623	Ginsenoside RG2	人参皂甙RG2	Steroids	甾体	Steroid	甾体	C42H72O13	767.498	784.497	10.6875	M+H-H2O	2.06076	2	0.7779	rp	52286-74-5	21599924	HMDB0035395	-	-	1499.71	1387.75	1706.13	1481.65	981.432	1310.74	1429.35	1270.57	244.909	189.791	221.224	811.971	1560.55	1564.09	1603.53	1126.67	902.387	1515.88	1925.1	1007.89	1642.48	1322.37	1288.23	998.038	1195.37	1281.7	1253.05	1260.2
C18_positive	MADP0518	N3-(4-fluorophenyl)-1h-pyrazolo[3,4-d]pyrimidine-3,4-diamine	N3-(4-氟苯基)-1H-吡唑并[3,4-d]嘧啶-3,4-二胺	Heterocyclic compounds	杂环化合物	Heterocyclic compounds	杂环化合物	C11H9FN6	291.098	244.087	5.2124	M+HCOO+2H	3.66389	2	0.8755	rp	522629-08-9	11644425	-	-	C75450	12996.9	12494.7	12692.4	15915	13165.8	13301.3	12652.2	15029.5	16677.4	14465.6	15598.1	14235	12271.4	14757.7	11492.9	10663	12074.2	10725.3	13680.1	13089.5	13544.4	14055.4	14551.4	14889.8	12712.9	12661.8	12600.8	12697.5
C18_positive	MW0009819	Sulochrin	磺胺嘧啶	Benzene and substituted derivatives	苯及其衍生物	Benzene and substituted derivatives	苯及其衍生物	C17H16O7	355.07	332.09	11.7605	M+Na	22.267	2	0.735	rp	519-57-3	160505	-	-	C00495	1670.2	1860.62	2514.89	3489.55	1811.07	2406.9	2584.31	1754.86	2391.19	2365.99	1588.99	898.505	1165.3	3132.25	985.909	2633.39	1737.04	1890.38	1391.51	1957.24	1757.44	1498.47	3043.13	4817.5	15643.4	15631.5	15314.9	15572.5
C18_positive	MW0007535	Maclurin	麦克卢林	Benzene and substituted derivatives	苯及其衍生物	Benzene and substituted derivatives	苯及其衍生物	C13H10O6	263.057	262.048	6.7536	M+H	2.17925	2	0.9001	rp	519-34-6	68213	HMDB0032644	-	C09951	9072.76	8161.6	9119.55	10004	8778.28	8846.29	6054.44	7611.23	10289	8866.29	7287.95	6325.86	7225.77	9967.79	6882.68	6655.18	8468.98	9558.55	7924.63	9668.08	7061.88	7654.82	8094.65	8713.79	12913.6	12799.9	12958	12786.4
C18_positive	MW0117743	2,1,3-Benzothiadiazole-4-carbaldehyde	2,1,3-苯并噻二唑-4-甲醛	Benzene and substituted derivatives	苯及其衍生物	Benzene and substituted derivatives	苯及其衍生物	C7H4N2OS	220.003	164.004	13.0645	M+K+NH3	6.41625	4	0.6128	rp	5170-68-3	2776283	-	-	-	4521.35	4542.49	6639.55	4839.09	4598.04	4900.54	3545.2	3096.55	3459.56	3696.75	3609.47	3729.33	5951.36	4762.59	2247.2	4368.11	906.733	7385.64	3983.58	3717.39	3686.64	4249.79	4823.54	4071.56	6184.63	6915.72	6991.28	6004.27
C18_positive	MW0005010	4-Formyl-2-hydroxybenzoic acid	4-甲酰水杨酸；4-甲酰基-2-羟基苯甲酸	Benzene and substituted derivatives	苯及其衍生物	Benzene and substituted derivatives	苯及其衍生物	C8H6O4	149.023	166.027	6.3564	M+H-H2O	1.27065	2	0.9519	rp	51572-88-4	656876	-	-	-	65804.8	54017.8	62339.8	77626.9	52032.7	157819	40076.1	81119	38089.6	34118.8	39760.9	38806.9	76965.5	81715.6	53122.9	40446.7	68843.5	59461.8	62701	71385.2	75181.2	70952.7	72114.7	82530	53107.5	52836.9	53543.8	53932.2
C18_positive	MW0108327	Mezlocillin	美洛西林	Heterocyclic compounds	杂环化合物	Heterocyclic compounds	杂环化合物	C21H25N5O8S2	408.09	539.115	0.755	M+H-C5H8O4	6.57685	4	0.6099	rp	51481-65-3	656511	HMDB0015083	-	C07221	256.589	26.818	84.542	83.146	169.686	490.134	67.037	57.724	139.736	112.57	50.535	186.333	162.069	257.438	26.164	135.989	16.637	38.148	88.937	11.275	453.494	500.352	584.578	242.699	416.128	385.496	417.61	411.281
C18_positive	ZINC338128	Homomoschatoline	高沙托林	Alkaloids	生物碱	Alkaloids	生物碱	C19H15NO4	360.063	321.1	1.9999	M+K	2.23	4	0.6972	rp	5140-38-5	145779	-	-	-	19.834	13.448	41.468	24.023	6.597	9.944	15.765	14.727	7.982	5.028	12.203	23.865	19.565	71.681	7.965	2.891	4.92	11.868	1.836	7.557	8.624	4.453	28.715	4.464	180.541	186.108	182.067	173.569
C18_positive	MW0151276	Azuleno(6,5-b)furan-2,5-dione, 3,3a,4,4a,7a,8,9,9a-octahydro-3-hydroxy-3-(hydroxymethyl)-4a,8-dimethyl-	Azuleno(6,5-b)furan-2,5-dione, 3,3a,4,4a,7a,8,9,9a-octahydro-3-hydroxy-3-(hydroxymethyl)-4a,8-dimethyl-	Heterocyclic compounds	杂环化合物	Heterocyclic compounds	杂环化合物	C15H20O5	421.21	280.131	2.9934	3M+2H	10.1847	4	0.5505	rp	51292-63-8	216285	-	-	-	4.64112e+06	4.57155e+06	4.19471e+06	5.2499e+06	4.70503e+06	4.5286e+06	4.52022e+06	4.88498e+06	5.43197e+06	4.97098e+06	4.9761e+06	352.496	5.05699e+06	5.58142e+06	1281.66	322.694	1059.94	348.035	5.16437e+06	4.8459e+06	4.85462e+06	4.73584e+06	4.39822e+06	4.73589e+06	34161.6	31500.2	28921.6	31981.6
C18_positive	MW0105167	FAPy-adenine	4，6-二氨基-5-甲酰氨基嘧啶	Heterocyclic compounds	杂环化合物	Heterocyclic compounds	杂环化合物	C5H7N5O	195.106	153.065	2.4767	M+CH3CN+H	9.56382	2	0.6913	rp	5122-36-1	114926	HMDB0004816	7080	C06502	675.863	1008.64	338.081	1649.74	786.634	852.431	1157.21	985.428	464.396	646.362	840.207	806.442	1134.88	629.172	1082.69	543.933	223.852	316.453	716.196	951.193	918.25	1042.1	448.7	1013.5	712.485	578.833	746.25	808.821
C18_positive	MW0146833	Borreverine	硼雷维林	Heterocyclic compounds	杂环化合物	Heterocyclic compounds	杂环化合物	C32H40N4	463.33	480.325	12.2366	M+H-H2O	16.036	4	0.7243	rp	51109-65-0	442020	-	-	C09082	26504.6	22197.6	29378.2	38244.5	39179.1	30089.7	15425.2	13197.1	20054.6	21676.3	24014.5	19488.3	23803.4	2956.03	16042.3	18871.1	21248.8	19270.8	35040.9	3688.3	22009.6	14442.1	19889.7	16143.1	23232.4	25747.9	24938	26620.3
C18_positive	MW0148859	Echinocystic acid	棘囊酸	Organic acid and Its derivatives	有机酸及其衍生物	Organic acid and Its derivatives	有机酸及其衍生物	C30H48O4	437.349	472.355	7.1725	M+H-2H2O	12.6195	2	0.8687	rp	510-30-5	73309	-	-	C08942	104.958	117.937	117.343	85.275	96.743	85.22	760.559	820.06	849.515	685.319	687.992	861.818	7.702	4.503	7.635	4.16	6.314	5.444	6.939	1.168	5.778	4.987	7.613	7.271	150.429	149.283	149.083	144.113
C18_positive	MEDP1002	Acetylcholine	乙酰胆碱	Aldehyde,Ketones,Esters	醛、酮、酯类	Esters	酯类	C7H16NO2+	222.029	146.118	2.583	M-H+2K	1.38919	1	0.6992	rp	51-84-3	187	HMDB0000895	57	C01996	1575.55	1597.27	1652.71	1949.87	1599.09	1773.58	1871.46	2235.25	2404.18	1882.64	1977.13	1848.3	2047.81	2314.97	1721.09	1580.95	1895.62	1585.13	2322.43	1873.96	1992.85	2057.45	2296.39	2177.74	1366.45	1432.71	1488.16	1532.86
C18_positive	MW0012806	1-Heptadecanoyl-sn-glycero-3-phosphocholine	1-十七碳酰基-sn-甘油-3-磷酸胆碱	GP	甘油磷脂类	PC	磷脂酰胆碱	C25H52NO7P	510.356	509.348	9.2961	M+H	2.79962	1	0.9435	rp	50930-23-9	24779463	HMDB0012108	-	C04230	1.29901e+06	1.22767e+06	1.28481e+06	1.51798e+06	1.33415e+06	1.28572e+06	1.56629e+06	1.48048e+06	1.79861e+06	1.44287e+06	1.56228e+06	1.38164e+06	1.66478e+06	1.90556e+06	1.38108e+06	1.46849e+06	1.50702e+06	1.15542e+06	1.64663e+06	1.29e+06	1.82434e+06	1.64496e+06	1.7874e+06	1.85262e+06	1.46196e+06	1.45856e+06	1.4506e+06	1.46117e+06
C18_positive	MEDP1170	9-Octadecenal	9-十八烯醛	Aldehyde,Ketones,Esters	醛、酮、酯类	Aldehydes	醛类	C18H34O	330.28	266.261	6.2491	M+CH3CN+Na	5.64705	2	0.5397	rp	5090-41-5	5283381	HMDB0030965	-	-	4955.73	5052.15	4517.78	4935	4926.08	4727.06	25646.2	26978.3	24707.7	28772	26861.3	24785.9	1002.23	1652.47	3766.86	3339.39	5145.57	8451.75	9538.8	14716.9	6732.85	7234	5.675	5511.56	12244.4	12241.5	12124.9	12180.9
C18_positive	MW0145125	Anhydrorhodovibrin	脱水紫红丝蛋白	Others	其他	Others	其他	C41H58O	584.473	566.449	11.3995	M+NH4	15.7054	3	0.6145	rp	5085-16-5	5368308	-	-	-	339292	325409	327865	763272	358941	362763	731600	994740	480399	787964	418478	385126	764767	837386	334241	645569	707314	607647	413707	375914	404627	473525	433634	438138	547071	547385	575596	517399
C18_positive	MW0118788	Purine, 6-(o-nitrobenzylthio)-	嘌呤, 6-(o-nitrobenzylthio)-	Benzene and substituted derivatives	苯及其衍生物	Benzene and substituted derivatives	苯及其衍生物	C12H9N5O2S	231.989	287.048	13.0925	M+H-C4H8	3.26175	4	0.6748	rp	5069-63-6	95844	-	-	-	13204.8	2221.34	9809.88	11934.3	10537.3	12867.5	10036.8	1558.04	10260.8	10251.7	10959.1	9281.72	15524.3	12494.6	10794.5	10208.4	10969.8	10629.6	13204.2	20232.6	10359.3	39797.2	1198.5	12861.1	11698.6	11771	12147.5	11794.8
C18_positive	MW0108107	Lys-Trp	L-赖氨酸-L-色氨酸	Amino acid and Its metabolites	氨基酸及其代谢物	Small Peptide	小肽	C17H24N4O3	441.176	332.185	0.7321	M+H	0.173585	2	0.793	rp	50674-18-5	4369395	HMDB0028962	-	-	410.945	2673.17	5366.33	2493.09	4983.1	5131.34	11827.8	11861.3	2267.44	19529.9	8416.82	13366.6	3276.36	2748.9	2335.82	2837.12	1731.71	1065.74	5954.81	42.824	12804.2	8966.42	13644	11584.6	11476.6	12629.5	12204.3	12454.8
C18_positive	MW0055293	Nervonic acid	神经酸	FA	脂肪酰类	FFA	游离脂肪酸	C24H46O2	331.341	366.35	7.4461	M+H-2H2O	10.7973	2	0.8629	rp	506-37-6	5281120	HMDB0002368	262	C08323	11945.4	24211.7	11736.3	12595	11799.5	42042	23115.7	14850.7	39253.6	12580	11905.2	11779.6	61147.4	18652	33616.4	31455.7	45625.5	12693.6	35720.9	11440.1	60797.3	33757.3	50328.2	54450.1	39008	39613.1	39108	38709.3
C18_positive	MW0052998	gamma-Linolenic Acid	γ-亚麻酸	FA	脂肪酰类	FFA	游离脂肪酸	C18H30O2	279.233	278.225	8.9349	M+H	1.09315	1	0.6943	rp	506-26-3	5280933	HMDB0003073	386	C06426	1201.7	1221.46	951.842	1101.07	946.755	784.462	6292.37	7620.3	4872.16	4807.04	5233.33	7085.18	2662.11	602.751	245.545	385.041	376.553	417.379	612.819	406.163	503.023	467.554	794.305	486.91	2171.77	2206.11	2228.57	2186.49
C18_positive	MW0012560	16-Hydroxyhexadecanoic acid	16-羟基十六酸	FA	脂肪酰类	FFA	游离脂肪酸	C16H32O3	290.27	272.235	5.9742	M+H+NH3	4.6375	4	0.8965	rp	506-13-8	10466	HMDB0006294	-	C18218	4924.33	2278.62	2288.81	3587.1	2774.51	3406.75	1600.46	5263.15	1540.71	3425.42	2646.11	2711.99	2834.85	3873.35	2423.07	2414.98	2409.51	2926.4	5267.77	4068.17	2779.23	2962.16	1808.96	2547.73	4972.62	5026.04	4980.56	5001.66
C18_positive	MEDP0902	12-Hydroxydodecanoic acid	12-羟基十二酸	Organic acid and Its derivatives	有机酸及其衍生物	Organic acid and Its derivatives	有机酸及其衍生物	C12H24O3	181.159	216.173	6.6698	M+H-2H2O	1.42886	1	0.6502	rp	505-95-3	79034	HMDB0002059	6465	C08317	1.859	2.984	5.69	3.256	1.545	2.777	4.166	4.486	4.438	0.353	3.177	4.734	1.587	20.315	1.363	2.614	0.982	3.743	2.561	4.207	5.921	1.41	1.674	5.291	141.006	142.152	140.41	140.95
C18_positive	MW0112095	Crotyl alcohol	巴豆醇	Alcohol and amines	醇、胺类	Alcohols	醇类	C4H8O	145.122	72.0575	3.92	2M+H	0.810525	2	0.7084	rp	504-61-0 | 6117-91-5	637922	HMDB0033858	-	-	224.186	272.358	212.852	342.536	228.692	229.64	308.759	378.872	320.201	284.084	268.16	235.747	403.285	752.147	264.348	182.112	262.016	177.357	204.435	286.843	192.499	332.717	337.79	431.206	1890.53	1898.4	1882.45	1912.01
C18_positive	MW0052386	Dihydrouracil	二氢尿嘧啶	Nucleotide and Its metabolites	核苷酸及其代谢物	Nucleotide and Its metabolites	核苷酸及其代谢物	C4H6N2O2	115.05	114.043	10.6723	M+H	9.81875	4	0.556	rp	504-07-4	649	HMDB0000076	285	C00429	975.827	880.764	976.763	1275.09	1293.3	1401.83	1134	1262.11	2339.23	1657.05	1284.25	1442.76	1204.15	1377.44	1418.2	1357.99	1319.55	720.662	1232.78	1620.7	1524.71	1924.14	1759.64	1615.89	1321.07	1276.36	1289.67	1271.38
C18_positive	MW0054155	Isovaleric acid	3-甲基丁酸酯	FA	脂肪酰类	FFA	游离脂肪酸	C5H10O2	67.054	102.068	4.2581	M+H-2H2O	0.45	3	0.938	rp	503-74-2	10430	HMDB0000718	109	C08262	3839	3452.38	4005.71	4027.51	3932.35	3631.7	3710.78	3881.46	4282.28	4103.75	3921.8	4086.54	3582.26	5087.28	3134.03	3020.7	3765.55	3658.32	3853.68	3555.18	4073.53	3859.54	4243.38	4410.83	6277.54	6325.27	6267.14	6159.33
C18_positive	MW0156386	Rhodovibrin	红霉素	Terpenoids	萜类	Terpenoids	萜类	C41H60O2	585.477	584.459	11.3995	M+H	15.9717	3	0.5261	rp	5017-53-8	5366505	-	-	-	161823	157743	158967	192580	174744	175730	185287	257625	230066	374974	202414	185979	186459	399915	162378	305144	338584	157903	194664	181348	193160	233668	208360	235131	183152	183124	185300	179601
C18_positive	MW0106090	Caffeic acid	咖啡酸	Organic acid and Its derivatives	有机酸及其衍生物	Organic acid and Its derivatives	有机酸及其衍生物	C9H8O4	222.08	180.042	4.637	M+CH3CN+H	9.43573	2	0.7082	rp	501-16-6	689043	HMDB0001964	-	C01481	1494.38	564.823	1259.63	681.867	772.198	447.002	3964.22	3246.3	2540.77	2907	3130.8	3819.62	581.2	586.874	640.454	732.961	492.918	877.087	3285.09	2947.18	3526.65	3774.49	3718.15	3558.7	4089.55	4056.62	4060.9	4056.49
C18_positive	MEDN0061	Phenylacetylglycine	苯乙酰甘氨酸	Amino acid and Its metabolites	氨基酸及其代谢物	Amino acid derivatives	氨基酸衍生物	C10H11NO3	176.071	193.074	4.133	M+H-H2O	0.410646	1	0.7233	rp	500-98-1	68144	HMDB0000821	4237	C05598	39915.1	35904.8	37134	45710.7	41476.2	40593.4	39929.2	40347.3	47456.1	42733.7	42723.1	38819	41735.2	49544.8	35392.7	35011.7	39394.2	33961.2	42533	40181.5	42938.1	43305.6	40686	43746.8	39373.5	40200.5	39786.4	39612.2
C18_positive	MEDP0176	Thymidine	胸苷	Nucleotide and Its metabolites	核苷酸及其代谢物	Nucleotide and Its metabolites	核苷酸及其代谢物	C10H14N2O5	281.051	242.09	9.9116	M+K	6.29501	2	0.7194	rp	50-89-5	5789	HMDB0000273	3375	C00214	1136.06	892.35	1478.55	1493.26	1052.94	1123.61	1738.64	1733.6	1676.22	1446.19	1544.87	1283.75	815.256	1893.94	985.076	855.392	1130.21	1093.75	1244.85	1148.95	1077.32	1149.26	1721.05	1464.27	8641.65	8690.92	8644.16	8667.16
C18_positive	MW0006085	Aspirin	乙酰水杨酸	Organic acid and Its derivatives	有机酸及其衍生物	Organic acid and Its derivatives	有机酸及其衍生物	C9H8O4	225.01	180.042	0.5499	M-H+2Na	9.78077	2	0.7273	rp	50-78-2	2244	HMDB0001879	-	C01405	2221.16	2602.98	2503.84	2645.56	3284.62	2592.05	2941.93	3599.16	5359.35	3383.27	4265.97	2971.1	3105.59	2425.12	3979.32	4181.2	4080.12	5756.99	8048.86	5725.97	6372.99	9639.05	7277.51	6730.09	6571.07	6531.85	6528.61	6534.69
C18_positive	MW0012684	Estradiol	17β-雌二醇	Hormones and hormone related compounds	激素及激素相关物质	Hormones and hormone related compounds	激素及激素相关物质	C18H24O2	447.237	272.178	2.6742	3M+2K	4.07525	4	0.6578	rp	50-28-2	5757	HMDB0000151	263	C00951	3.426	6.671	11.158	1.552	2.057	2.37	6.031	1.425	3.071	3.95	4.905	2.421	6.436	4.841	2.632	3.722	3.938	4.524	6.702	1.804	0.604	3.437	8.079	2.063	45.576	42.777	43.403	38.428
C18_positive	MEDP2133	2,6-Pyridinedicarboxylic acid	2,6-吡啶二羧酸	Heterocyclic compounds	杂环化合物	Heterocyclic compounds	杂环化合物	C7H5NO4	150.027	167.022	9.7149	M+H-H2O	19.4033	2	0.7754	rp	499-83-2	10367	HMDB0033161	-	-	172925	162726	166195	191736	179973	177565	192348	214180	241310	213188	196496	177114	203262	216857	155187	159276	169803	159181	194269	169209	197637	199872	218339	208652	186795	187082	186353	184036
C18_positive	MW0055361	Norcamphor	降樟脑	Terpenoids	萜类	Sesquiterpenoids	倍半萜	C7H10O	111.08	110.073	8.4594	M+H	0.4125	4	0.7398	rp	497-38-1	10345	-	-	-	4072.3	3504.73	4476.24	5274.19	3880.78	4016.78	4087.61	4342.57	4877.11	4823.14	4280.8	4229.69	4722.21	5384.77	4069.47	3864.14	4148.2	3721.54	4200.27	4007.81	4438.26	4287.04	5375.01	5165.88	6502.57	6400.76	6561.24	6480.92
C18_positive	MW0006086	Aspulvinone E	Aspulvinone E	Benzene and substituted derivatives	苯及其衍生物	Phenolics	苯酚类	C17H12O5	297.083	296.068	9.6847	M+H	17.4261	2	0.647	rp	49637-60-7	54675753	-	-	C02006	36.533	40.048	78.156	76.746	51.858	80.037	125.88	83.819	74.704	38.196	33.5	46.24	80.527	487.851	33.378	38.981	38.251	27.71	47.429	32.576	24.04	46.064	196.45	173.204	3921.96	3823.44	3869.97	3932.42
C18_positive	MW0003876	5-Bromo-4-hydroxy-[1,1'-biphenyl]-3-carboxylic acid	5-溴-4-羟基-[1,1'-联苯]-3-羧酸	Benzene and substituted derivatives	苯及其衍生物	Benzene and substituted derivatives	苯及其衍生物	C13H9BrO3	256.965	291.974	12.2521	M+H-2H2O	13.2902	2	0.6846	rp	4906-68-7	268734	-	64822	-	71222.4	62606.7	65063.8	81937.7	71512.8	77452.1	76745	66589.1	94576.9	76815.3	73446.8	75888.6	87374.9	79961.1	61747.6	57783.3	75205.5	64965.2	75504.9	73539.7	77836	84714	86026.9	85340	75378.3	76855.3	74693.3	73041.9
C18_positive	MW0002327	2,5-Dihydroxybenzoic acid	2,5-二羟基苯甲酸	Benzene and substituted derivatives	苯及其衍生物	Benzene and substituted derivatives	苯及其衍生物	C7H6O4	199.001	154.027	12.2674	M-H+2Na	7.11786	2	0.6356	rp	490-79-9	3469	HMDB0000152	618	C00628	29089.4	32145.7	30174.8	39645.6	32877.3	32987.6	29692.5	34131.8	49771	34004.1	36061.3	35844.7	32401.2	42777.9	35182.9	28984	37141.9	29447.2	33024.6	39111.2	40208.1	45121.3	37242.4	35021.6	36572.6	35972.9	34470.8	36212
C18_positive	MEDL01948	Jasmone	顺式-茉莉酮	Aldehyde,Ketones,Esters	醛、酮、酯类	Ketones	酮类	C11H16O	165.131	164.12	0.717	M+H	10.2225	1	0.8521	rp	488-10-8	1549018	HMDB0035601	-	C08490	485668	502808	536209	689547	423117	498820	512846	445116	382608	479667	384032	431035	1.03271e+06	944374	522987	625580	350625	177190	491210	221679	747053	626346	774181	730413	506296	505870	506266	501419
C18_positive	MW0168567	Indole-3-carboxaldehyde	吲哚-3-甲醛	Heterocyclic compounds	杂环化合物	Indole and Its derivatives	吲哚及其衍生物	C9H7NO	146.06	145.053	4.133	M+H	0.147657	1	0.7856	rp	487-89-8	10256	HMDB0029737	-	C08493	118377	106254	110941	129359	120607	128565	114653	145084	135717	117038	121390	113979	122338	149109	107669	105635	147488	103780	127934	115928	128529	128357	138203	128324	112991	114560	112829	113313
C18_positive	MW0114598	Homodihydrojasmone	高二氢茉莉酮	Aldehyde,Ketones,Esters	醛、酮、酯类	Ketones	酮类	C12H20O	227.164	180.151	7.5408	M+HCOO+2H	0.391014	3	0.7314	rp	4868-24-0	11137732	HMDB0031181	-	-	1.189	2.336	1.662	6.14	2.033	6.531	3.201	1.456	4.612	5.767	2.542	2.082	1.235	5.288	0.883	1.197	1.03	0.89	0.838	3.094	0.603	3.888	2.752	8.79	87.361	86.889	87.092	85.974
C18_positive	MW0127358	5-(Benzylthio)-1,3,4-thiadiazole-2-thiol	5-(苄硫基)-1,3,4-噻二唑-2-硫醇	Benzene and substituted derivatives	苯及其衍生物	Benzene and substituted derivatives	苯及其衍生物	C9H8N2S3	262.982	239.985	12.2366	M+Na	0.099	4	0.7475	rp	4858-36-0	798021	-	-	-	6329.07	4620.25	5588.86	7372.58	6401.24	5193.47	7182.65	7191.04	9057.29	6241.55	7433.73	6855.78	6872.9	8382.1	5379.06	5682.49	7297.78	5726.27	5743.07	5818.41	6940.18	7193.01	8179.57	7704.1	7012.32	7286.68	6982.02	6596.8
C18_positive	MW0138842	Luvangetin	卢万杰京	Heterocyclic compounds	杂环化合物	Heterocyclic compounds	杂环化合物	C15H14O4	322.109	258.089	2.0039	M+CH3CN+Na	8.51653	2	0.5927	rp	483-92-1	343582	-	-	C09273	2.36	5.356	7.306	1.458	1.196	2.776	0.74	1.408	0.14	2.913	1.573	0.08	3.373	12.541	0.64	1.436	1.593	1.68	0.838	1.004	2.107	0.893	7.831	4.226	68.595	70.231	68.342	67.221
C18_positive	MW0141777	Cyperquat	赛草快	Heterocyclic compounds	杂环化合物	Pyridine and pyridine derivatives	吡啶及其衍生物	C12H12N+	193.084	170.097	3.3275	M+Na	2.436	4	0.6927	rp	48134-75-4	39484	HMDB0033123	-	-	0.181	0.071	0.035	0.252	0.271	0.156	0.57	1.783	1.536	0.051	1.143	0.761	1.176	0.932	0.1	0.677	1.064	0.27	0.987	1.104	0.534	0.085	0.999	0.204	45.842	48.297	45.769	43.677
C18_positive	MW0110988	Dimethyldiallylammonium	二甲基二烯丙基铵	Others	其他	Others	其他	C8H16N+	165.091	126.128	5.038	M+K	1.8135	4	0.7067	rp	48042-45-1 | 26062-79-3	33287	-	-	-	28.825	31.908	32.399	38.24	38.033	40.8	54.993	41.84	40.523	45.383	29.203	34.087	45.739	58.096	33.315	30.083	34.123	28.878	32.356	35.059	44.742	42.834	30.73	31.692	318.433	311.458	309.873	309.878
C18_positive	MW0149206	Flaviolin	弗拉维奥利；2，5，7-三羟基-1，4-萘二酮	Benzene and substituted derivatives	苯及其衍生物	Benzene and substituted derivatives	苯及其衍生物	C10H6O5	207.033	206.022	6.7536	M+H	11.1659	3	0.8704	rp	479-05-0	160478	-	-	C18012	50535.2	47460.1	52940.1	62528	47819.8	51406.9	37411.1	50698.9	62844.8	54800.1	44577.1	39119	43007	57866.6	40106	38628.8	47703.8	57253.1	43916.8	53568.1	40629.2	40642.2	42518.3	47954.7	87814.3	88704.9	89127.4	87661.4
C18_positive	MW0053754	Glycocholic acid	甘氨胆酸	Bile acids	胆汁酸	Bile acids	胆汁酸	C26H43NO6	931.618	465.309	8.3688	2M+H	7.13964	2	0.5226	rp	475-31-0	10140	HMDB0000138	-	C01921	28632.2	26286.9	27618	29737.4	31017.2	29284.3	31304.7	32134	34699.4	29742.5	30917.9	30082.2	33502.3	33717	25610.2	28534	29499.1	26574.6	28822.1	27204.7	31220.5	35593.5	32692.3	36111.6	26188.6	27291.6	26794.7	26945.9
C18_positive	MW0053757	Glycolithocholic acid	甘氨石胆酸	Bile acids	胆汁酸	Bile acids	胆汁酸	C26H43NO4	434.32	433.319	8.3688	M+H	13.8375	3	0.7049	rp	474-74-8	115245	HMDB0000698	5666	C15557	12381.3	11805.3	13253.9	13101.2	12653.6	10042.5	12852.7	14271.4	16634.2	14464.2	13421.1	12852	11650.5	14074.7	10860.6	11099.3	11911.4	11404.1	13907	10574.8	13059.2	13601.9	11582.2	16300.2	10949.3	10890.4	10751.1	10986.4
C18_positive	MW0149313	Funtumine	富图明	Alcohol and amines	醇、胺类	Amines	胺类	C21H35NO	300.27	317.272	6.2338	M+H-H2O	5.33775	4	0.8829	rp	474-45-3	101702	-	-	-	832.419	2238.89	2087.9	66.918	1392.43	2024.22	12603.9	12787.7	13341.3	10924.1	10064.8	11077	458.323	75.6	207.169	156.891	853.761	69.744	687.236	991.877	1901.49	1445.94	1906.21	2742.1	3251.19	3058.53	3284.4	3171.65
C18_positive	MW0014060	2-Methyl-3-hydroxybutyric acid	2-甲基-3-羟基丁酸	Organic acid and Its derivatives	有机酸及其衍生物	Organic acid and Its derivatives	有机酸及其衍生物	C5H10O3	119.072	118.063	2.583	M+H	4.275	3	0.9055	rp	473-86-9	160471	HMDB0000354	3786	-	3754.65	3867.41	3895.37	4750.34	4412.02	3690.86	4611	4657.81	5061.08	4730.59	4658.04	4442.15	5110.09	6412.55	4085.73	4519.42	4735.88	4030.11	5545.55	4241.44	4989.65	3179.83	5192.72	5685.1	3866.18	3719.89	3789.5	3985.58
C18_positive	MEDL01794	Betulinic acid	白桦脂酸	Terpenoids	萜类	Triterpene	三萜	C30H48O3	439.357	456.36	7.5382	M+H-H2O	1.62557	2	0.843	rp	472-15-1	64971	HMDB0030094	-	C08619	57178.9	49826.4	50635.1	65618.4	54869.7	13234.6	60086	54628.9	62906.4	59730	57523.5	57717.7	57843.5	84197.6	52864.1	51393.3	56878.4	48379.2	57950.4	50792.2	11872.4	12214.3	61809.1	60735	56767.1	57898.6	58462	58559.5
C18_positive	MW0124072	Eucalyptol	桉叶素	Others	其他	Others	其他	C10H18O	155.143	154.136	5.6362	M+H	0.58675	4	0.7355	rp	470-82-6 | 8000-48-4	2758	HMDB0004472	4020	C09844	1.118	0.504	0.945	0.474	0.132	0.485	1.944	1.182	0.617	0.314	0.632	0.553	1.181	6.361	0.235	0.959	0.315	0.533	0.414	0.297	0.243	0.288	1.419	1.131	45.721	45.153	45.265	44.711
C18_positive	MW0139379	Pisatin	皮萨廷；（-)-匹沙汀	Heterocyclic compounds	杂环化合物	Heterocyclic compounds	杂环化合物	C17H14O6	332.12	314.079	8.4442	M+NH4	18.7397	2	0.6037	rp	469-01-2 | 20186-22-5	101689	HMDB0033732	-	-	22.223	21.262	44.753	40.479	26.963	29.315	30.109	38.622	12.918	31.017	16.25	19.728	9.101	105.243	15.039	9.016	17.855	21.737	22.963	18.487	13.115	25.637	38.865	29.476	628.805	637.398	623.235	630.231
C18_positive	MW0147241	Cassaine	卡萨纳	Aldehyde,Ketones,Esters	醛、酮、酯类	Ketones	酮类	C24H39NO4	406.295	405.288	7.0736	M+H	0.224778	4	0.7444	rp	468-76-8	5281267	-	-	C08670	117.209	141.238	139.581	138.087	65.629	105.44	2172.63	2302.9	2329.71	2476.75	2313.49	2143.82	30.546	55.34	32.141	95.174	28.541	42.843	74.523	56.556	54.587	12.639	45.391	58.488	367.289	378.641	374.296	376.888
C18_positive	MEDP1836	Nootkatone	诺卡酮	Aldehyde,Ketones,Esters	醛、酮、酯类	Ketones	酮类	C15H22O	219.174	218.167	10.4005	M+H	0.423074	2	0.8614	rp	4674-50-4 | 28834-25-5	1268142	-	-	C17914	7926.71	5270.25	18821.6	6038.48	8583.88	15499.1	9715.8	25008.7	26093.4	11765.7	13739.1	8729.33	8264.91	7508.82	681.993	6333.8	11539.7	5576.63	31147.9	8196.91	2760.75	18948.1	11535.6	20250.1	9150.76	8489.99	8007.9	9883.02
C18_positive	MW0055356	Nookatone	-	Terpenoids	萜类	Sesquiterpenoids	倍半萜	C15H22O	205.143	218.167	10.5965	M+H-CH2	10.1635	4	0.5508	rp	4674-50-4	20797	HMDB0013687	-	-	40943.3	38828.5	38247.7	37695.4	32942.5	37850.5	35147.3	39827.5	44424.3	40039.8	35673	31458.1	47762.5	37122.5	33887.3	31493.5	32142.1	32299.1	39892.2	31356.6	45240	44443.4	43255.9	46983.8	34147.8	34223	34264.1	34743.2
C18_positive	MW0010792	(+)-trans-Chrysanthemic acid	反式菊酸	Organic acid and Its derivatives	有机酸及其衍生物	Organic acid and Its derivatives	有机酸及其衍生物	C10H16O2	169.122	168.115	8.3382	M+H	0.3863	2	0.7266	rp	4638-92-0	16747	-	-	C09842	0.462	0.689	0.203	0.465	0.587	0.42	0.349	1.358	0.665	0.377	0.433	0.295	0.693	4.781	0.023	0.312	0.037	0.24	1.24	0.24	0.374	0.343	1.184	2.135	83.896	84.054	83.764	84.209
C18_positive	MW0143827	Obeticholic acid	奥贝胆酸	Organic acid and Its derivatives	有机酸及其衍生物	Organic acid and Its derivatives	有机酸及其衍生物	C26H44O4	459.28	420.324	11.3274	M+K	2.2842	4	0.946	rp	459789-99-2	447715	-	-	-	4340.15	8606.51	5385.07	5724.78	4939.9	6148.54	9645.37	14943.9	12525.8	9728.89	6098.08	10258	5420.92	6245.07	4621.39	9167.74	5505.8	4450.5	5700.72	5086.44	11618.7	11888	6223.57	12351.1	7970.04	8589.2	8344.59	7953.03
C18_positive	MW0116828	5-Bromopyrimidine	11-过氧二十二碳六烯酸	Aldehyde,Ketones,Esters	醛、酮、酯类	Esters	酯类	C4H3BrN2	196.918	157.948	12.3594	M+K	2.602	4	0.689	rp	4595-59-9	78344	HMDB0062285	-	-	12841.3	9827.97	13172.3	11689.3	13241.1	14422.9	11577.6	14070.5	16723.7	14208.6	9624.8	11599.8	14848.1	16190.1	12265.3	12440.3	12296	12316.9	15147.1	14079.6	15237.8	15347.7	14434.1	15735.3	13515.9	13512.7	13632.5	13518.7
C18_positive	MW0015867	Arachidonoyl-N,N-dimethyl amide	N，N-二甲基花生四烯胺	FA	脂肪酰类	Others	其他	C22H37NO	332.296	331.288	6.364	M+H	2.70359	2	0.9481	rp	45280-17-9	5283408	-	36695	-	1.27046e+06	1.09727e+06	1.19037e+06	1.19044e+06	1.09259e+06	1.16889e+06	5.29003e+06	5.38498e+06	5.97941e+06	5.84755e+06	5.20235e+06	5.67847e+06	589.254	2.20945e+06	1.80402e+06	43.072	2.44683e+06	30.823	2.11524e+06	2.0403e+06	2.06184e+06	2.12926e+06	16.759	2.12679e+06	1.96138e+06	1.99355e+06	1.93824e+06	1.96565e+06
C18_positive	MW0123898	Ethoxzolamide	乙唑胺	Alcohol and amines	醇、胺类	Amines	胺类	C9H10N2O3S2	302.987	258.013	4.4701	M-H+2Na	7.61731	2	0.6766	rp	452-35-7	3295	HMDB0014456	-	-	16883.6	15346.5	15759	19542.9	19184.3	18550.2	17554.6	21174.1	23260.3	19548.2	17685.4	18084.5	17365	19698	14853.5	14139.4	16982.8	14064	21511.8	17095	18875.5	20009.8	21579.3	20261.3	17318.1	17287.6	17548.2	17681
C18_positive	MW0111217	N-Methyldioctylamine	N-甲基二辛胺	Alcohol and amines	醇、胺类	Amines	胺类	C17H37N	278.274	255.293	9.7109	M+Na	22.7944	2	0.6085	rp	4455-26-9	78202	-	103466	-	5734.86	4635.39	5914.75	6136.9	5535.09	6057.41	5494.13	8331.23	7464.95	7188.76	6036.96	4156.32	6634.5	5491.84	4913.43	5476.5	5475.22	2890.81	6582.73	5318.52	6934.5	7168.94	7777.9	6880.78	4983.09	4636.36	5029.34	4944.64
C18_positive	MW0055423	Virodhamine hydrochloride	盐酸维罗达明	FA	脂肪酰类	Others	其他	C22H38ClNO2	348.29	383.259	4.8644	M+H	1.23219	2	0.9325	rp	443129-35-9	16079019	HMDB0013655	64927	-	85.579	181.378	136724	143.728	86.202	141.294	12666.5	13358.2	12306	15060.5	88081.7	15489.6	149227	240207	144157	125938	155463	141381	191300	158672	207454	222602	226377	186497	109537	110091	109291	109291
C18_positive	MW0113020	4-Aminobutyraldehyde	4-氨基丁醛	Aldehyde,Ketones,Esters	醛、酮、酯类	Aldehydes	醛类	C4H9NO	134.081	87.0684	0.7474	M+HCOO+2H	0.65	3	0.8499	rp	4390-05-0	118	HMDB0001080	3225	C02903	977.059	1142.07	1160.03	1420.59	647.75	1099.9	213.787	178.094	33.637	164.64	111.247	221.872	719.112	997.508	632.713	505.288	17.208	119.088	391.305	99.973	223.087	239.369	335.69	550.178	318.443	345.637	330.213	369.578
C18_positive	MW0001720	2-(((2-Ethylhexyl)oxy)carbonyl)benzoic acid	邻苯二甲酸 单(2-乙基己基)酯	Benzene and substituted derivatives	苯及其衍生物	Benzene and substituted derivatives	苯及其衍生物	C16H22O4	279.159	278.152	11.8544	M+H	0.151215	2	0.9431	rp	4376-20-9	20393	HMDB0013248	-	C03343	26036	34399.8	61430.3	66393.8	54775.8	64931.5	34525.9	69581.1	59103.3	58648.6	67002.8	57836.3	26464.9	43459.8	32835.4	49049.4	35900.5	39174.9	27176.3	24619.9	24872.3	54596.5	26497.4	28535.3	23889.8	21636.1	22480.3	18129.3
C18_positive	MW0106353	Dacarbazine	达卡巴嗪	Amino acid and Its metabolites	氨基酸及其代谢物	Small Peptide	小肽	C6H10N6O	183.101	182.092	4.2178	M+H	8.43369	2	0.6871	rp	4342-03-4	135398738	HMDB0014989	540	C06936	0.373	1.198	1.071	6.209	9.845	7.198	9.077	8.863	4.27	6.013	4.457	7.115	9.573	6.206	1.401	5.506	5.024	2.255	4.146	7.834	2.797	2.219	7.953	5.631	71.938	75.263	78.997	55.55
C18_positive	MW0127015	Zopiclone	佐匹克隆	Aldehyde,Ketones,Esters	醛、酮、酯类	Ketones	酮类	C17H17ClN6O3	411.094	388.105	9.684	M+Na	0.166375	2	0.9168	rp	43200-80-2	5735	HMDB0015329	-	-	4.03	3.563	5.67	4.215	4.813	5.901	23.302	13.128	12.144	6.52	2.029	5.17	7.797	97.207	3.875	2.27	2.27	18.104	1.869	3.542	0.092	5.357	40.473	31.217	721.055	711.295	716.781	699.058
C18_positive	MW0144030	8'-apo-beta-Carotenol	8′-脱辅基-β-胡萝卜素	Alcohol and amines	醇、胺类	Alcohols	醇类	C30H42O	441.307	418.324	8.9656	M+Na	10.9154	4	0.5397	rp	43126-13-2	5280991	-	-	C06733	3051.93	4145.94	3680.69	4694.14	3945.18	4148.12	4996.23	5220.75	6227.17	5055.83	5742.06	3311.34	4600.92	4245.17	3181.23	5465.43	10047.8	4710.33	4222.05	9637.07	5254.11	4208.73	4688.7	4190.07	3774.39	3675.46	3578.47	3646.42
C18_positive	MW0111848	1-Octen-3-one	1-Octen-3-一	Aldehyde,Ketones,Esters	醛、酮、酯类	Ketones	酮类	C8H14O	127.111	126.105	8.3229	M+H	0.251032	3	0.6991	rp	4312-99-6	61346	HMDB0031309	-	-	1272.22	1180.07	1323.71	1413.58	1115.02	1294.86	1381.51	1551.06	1494.41	1347.25	1380.72	1764.12	1290.79	2310.51	1000.42	1104.32	1255.53	1205.38	1339.68	1187.32	1285.58	1541.31	1755.25	1658.9	7323.21	7359.33	7386.36	7417.39
C18_positive	MW0112276	2-Propanoylthiazole	2-丙酰基噻唑	Heterocyclic compounds	杂环化合物	Heterocyclic compounds	杂环化合物	C6H7NOS	142.035	141.025	0.5499	M+H	7.36199	2	0.7121	rp	43039-98-1	65288	HMDB0037168	-	-	2515.28	2450.4	2355.26	2505.57	2842.38	2866.01	2816.22	2546.68	4024.04	3345.43	3334.76	3054.12	2933.96	2876.41	4008.94	3253.85	3756.49	4240.42	5498.26	4324.56	4561.1	5506.77	5100.81	4748.6	4347.76	4435.41	4422.13	4345.73
C18_positive	MADP0492	2-pyrimidine methanol	2-嘧啶甲醇	Heterocyclic compounds	杂环化合物	Heterocyclic compounds	杂环化合物	C5H6N2O	149.076	110.048	4.3336	M+K	4.72424	1	0.5867	rp	42839-09-8	67044161	-	-	-	9571.19	8218.93	9134.09	10708	9208.66	9395.31	9234.49	8140.48	12180.8	9469.69	9496.48	8900.68	12163	14159.4	9748.72	10661	10746.7	8591.33	10599.5	9860.63	11225.1	11443.1	9925.34	10945.6	9306.55	9083.57	9276.93	8971.74
C18_positive	MW0107567	Ile-Ile	L-异亮氨酸-L-异亮氨酸	Amino acid and Its metabolites	氨基酸及其代谢物	Small Peptide	小肽	C12H24N2O3	245.186	244.179	2.8261	M+H	0.525	3	0.7444	rp	42537-99-5	7010568	HMDB0028910	23681	-	48.825	0.942	4.682	26.089	4.92	97.191	142.545	60.943	252.159	165.794	164.939	237.899	10.116	25.26	2.217	3.795	6.842	22.983	64.971	46.667	14.03	57.201	57.802	119.435	546.275	512.714	564.164	566.605
C18_positive	MW0110342	Val-Glu	谷氨酸	Amino acid and Its metabolites	氨基酸及其代谢物	Small Peptide	小肽	C10H18N2O5	285.083	246.122	1.8678	M+K	3.425	3	0.7891	rp	424-59-9	7009623	HMDB0029126	-	-	1490.14	1252.1	1306.5	1546.63	1361.92	1404.84	5085.53	4300.25	3195.92	3794.38	3361.89	3948.53	168.942	80.513	273.609	190.632	164.952	320.417	1342.77	918.032	1230.98	1417.68	1287.72	1160.54	618.442	546.579	652.354	652.617
C18_positive	MW0011902	1,2-Dioleoyl-sn-Glycero-3-Phosphocholine	1，2-二油酰-sn-甘油-3-磷脂酰胆碱	GP	甘油磷脂类	PC	磷脂酰胆碱	C44H84NO8P	808.584	785.593	7.0276	M+Na	1.27529	2	0.8995	rp	4235-95-4	10350317	HMDB0000593	-	-	4394.72	2533.94	3400	3193.99	2917.08	2943.23	3235.68	5505.92	7878.98	8142.73	6494.14	5634.82	5932.15	6286.35	5846.59	6407.84	1993.53	4761.9	3631.8	3264.41	3905.94	2834.99	1183.62	1916.08	5844.55	5681.17	5662.44	5081.81
C18_positive	MW0131454	3,3-Diphenyl-3H-benzo[f]chromene	3,3-二苯基-3H-苯并[f]色烯	Benzene and substituted derivatives	苯及其衍生物	Benzene and substituted derivatives	苯及其衍生物	C25H18O	373.1	334.136	11.1188	M+K	1.91325	4	0.7044	rp	4222-20-2	3104870	-	-	-	1259.92	2517.64	675.408	781.579	826.721	544.006	1082.47	1036.05	960.913	2334.35	296.912	270.12	4769.69	1209.1	270.681	537.414	584.006	910.29	5523.89	651.11	794.267	885.858	2057.41	1227.29	4983.91	4961.5	4891.8	4963.8
C18_positive	MW0107247	His-Asp	组氨酸-天门冬氨酸	Amino acid and Its metabolites	氨基酸及其代谢物	Small Peptide	小肽	C10H14N4O5	393.108	270.096	4.133	M+H	10.7842	2	0.8197	rp	41658-60-0	7020094	-	23723	-	17476.3	15408.5	15324	17844.5	17019.1	17454.7	17633.5	17749.2	18700.5	18930.1	19665.5	16748.6	17583.2	19414.7	13495.3	16545.5	16616.3	14290.3	19277.4	16597.5	17850.8	19538.6	16867.4	18242.6	17300.9	18012	17316.7	16584.5
C18_positive	MW0010901	(1S,2S,4R,8R)-p-Menthane-1,2,8,9-tetrol	-	Alcohol and amines	醇、胺类	Alcohols	醇类	C10H20O4	222.17	204.136	6.3411	M+NH4	1.80163	3	0.6027	rp	402593-46-8	110677	HMDB0039974	-	-	7566.01	7245.8	5069.31	7153.4	6305.9	14167.6	3029.51	3128.12	2337.62	2057.28	2889.57	2955.63	6199.83	8819.97	6272.81	6751.72	6305.26	6413.4	7883.14	6997.3	8472.35	8186.95	8101.42	7282.03	5639.27	5736.89	5750.26	5620.61
C18_positive	MEDN1480	N-Arachidonoyl-L-Alanine	N-花生四烯酰基-L-丙氨酸	Amino acid and Its metabolites	氨基酸及其代谢物	Amino acid derivatives	氨基酸衍生物	C23H37NO3	376.286	375.277	6.1428	M+H	5.48525	2	0.8445	rp	401941-73-9	40846579	-	-	-	2346.93	2111.78	2051.45	2089.93	1770.04	1910.3	10829	12929	8449.32	13609.1	13036.6	11825.8	708.096	1460.73	1071.74	959.853	1006.28	1061.36	4814.66	3203.08	8354.1	6438.41	8281.48	7798.81	4114.47	4160.4	4173.81	4148.39
C18_positive	MW0116970	2-[(3-nitrophenyl)methylsulfanyl]-1H-benzimidazole	2-[(3-硝基苯基)甲硫基]-1H-苯并咪唑	Benzene and substituted derivatives	苯及其衍生物	Benzene and substituted derivatives	苯及其衍生物	C14H11N3O2S	286.056	285.057	0.9131	M+H	10.4935	4	0.5459	rp	401589-66-0	706117	-	-	-	377.415	384.524	378.881	455.013	371.012	427.619	130.712	147.075	104.915	100.996	145.953	139.592	359.293	300.24	463.763	376.62	329.776	937.642	328.272	315.947	263.942	218.728	59.62	301.966	555.389	538.112	589.498	538.799
C18_positive	MW0125834	Nitroxoline	硝唑啉	Heterocyclic compounds	杂环化合物	Heterocyclic compounds	杂环化合物	C9H6N2O3	257.113	190.038	5.1369	M-2H+3Na	0.53807	1	0.7413	rp	4008-48-4	19910	HMDB0015491	-	-	8727.53	7765.57	8745.16	10199.5	9690.85	8842.63	9101.39	8308.8	12015.5	9134.7	9182	9239.24	9189.54	10732	8277.96	8461.14	8965.58	7372.37	10984	9490.93	10986.2	10257.1	10723	10107.7	9546.78	9551.67	9479.77	9451.02
C18_positive	MW0194038	methyl {3-oxo-2-[(2Z)-pent-2-en-1-yl]cyclopentyl}acetate	{3-oxo-2-[(2Z)-pent-2-en-1-yl]环戊基}乙酸甲酯	FA	脂肪酰类	Others	其他	C13H20O3	225.149	224.141	6.9203	M+H	2.45827	2	0.866	rp	39924-52-2 | 1211-29-6 | 20073-13-6	5319693	HMDB0036583	-	-	678.602	731.634	593.461	728.406	899.022	779.294	640.3	1113.96	785.309	770.1	709.602	559.464	800.489	1117.62	722.485	570.72	634.755	552.143	478.622	679.039	797.112	841.655	857.455	906.887	2206.87	2144.26	2230.21	2193.77
C18_positive	MW0154347	Neamine	新胺	Alcohol and amines	醇、胺类	Amines	胺类	C12H26N4O6	361.153	322.185	6.1428	M+K	1.91325	4	0.9544	rp	3947-65-7	72392	-	-	C01441	1050.59	937.132	1140.31	1308.27	1140.68	1195.49	7104.56	7772.21	8172.02	8230.99	8144.22	8353.06	17.351	15.119	2.505	5.045	1010.02	14.84	12.758	11.106	36.464	6.442	1.713	9.741	2465.03	2493.4	2433.6	2446.82
C18_positive	MW0002157	2,3-Dihydroxy-4-methoxybenzoic acid	6-羟基-2-(3,4,5-三羟基苯基)-4H-铬-4-酮	Benzene and substituted derivatives	苯及其衍生物	Benzene and substituted derivatives	苯及其衍生物	C8H8O5	207.032	184.037	10.7482	M+Na	15.0653	2	0.8424	rp	3934-81-4	77534	HMDB0140912	-	-	3.975	3.141	3.07	4.934	6.318	5.359	16.007	10.68	9.933	6.446	4.927	3.323	5.36	52.247	3.552	3.515	1.436	2.012	2.486	2.408	4.738	2.569	25.554	22.271	395.166	385.063	381.882	388.775
C18_positive	MW0052954	Furfuryl octanoate	辛酸糠酯	Aldehyde,Ketones,Esters	醛、酮、酯类	Esters	酯类	C13H20O3	225.149	224.141	4.7432	M+H	0.6115	4	0.7349	rp	39252-03-4	61985	HMDB0037730	-	-	0.062	0.496	0.037	0.167	0.013	0.064	0.057	0.193	0.204	0.067	0.117	0.115	0.319	0.46	0.018	0.018	0.335	0.025	0.101	0.543	0.025	0.04	0.115	0.278	41.074	41.078	40.866	43.428
C18_positive	MW0124420	Indolepyruvate	吲哚-3-丙酮酸	Organic acid and Its derivatives	有机酸及其衍生物	Organic acid and Its derivatives	有机酸及其衍生物	C11H9NO3	204.066	203.058	4.133	M+H	0.15	3	0.9625	rp	392-12-1	803	HMDB0060484	-	C00331	7564.51	5817.41	6975.83	7769.24	6553.15	6800	6722.26	7394.94	7068.24	6751.87	6661.21	5952.78	7453.64	7854.27	6967.13	6568.78	6920.64	6638	7169.31	6714.72	6837.65	6986.94	6990.11	7173.05	6259.42	6011.06	6390.04	6274.19
C18_positive	MW0055209	(5Z,8Z,11Z,14Z)-N-(3-Furanylmethyl)-5,8,11,14-eicosatetraenamide	-	FA	脂肪酰类	Others	其他	C25H37NO2	384.288	383.282	6.1428	M+H	4.4477	2	0.9033	rp	390824-20-1	10199993	-	45375	-	6007.43	4928.49	5786.28	6449.38	5670.5	5664.43	32802.2	31962.8	33291.2	38595.4	34833.5	34802.1	3308.01	2940.22	3903.07	3835.65	4687.65	3139.96	14278.9	9360.74	18468.3	15433.4	16405.5	18376.7	11182.9	11060.7	10811.7	11005.7
C18_positive	MW0007640	Methoxamine	甲氧明	Benzene and substituted derivatives	苯及其衍生物	Benzene and substituted derivatives	苯及其衍生物	C11H17NO3	253.148	211.121	4.5004	M+CH3CN+H	13.9312	2	0.7984	rp	390-28-3	6082	HMDB0014861	-	C07513	7552.13	7974.01	7125.51	9099.84	8350.74	8151.67	6391.26	7393.97	9003.84	7056.11	6689.69	7372.05	10179.8	9631.72	7249.73	8259.16	8823.55	11481.5	8759.78	7702.25	10437	6640.58	9174.02	9919.76	9772.5	10981.2	10672.2	10642.2
C18_positive	MW0004638	4-amino-N-(2,2,2-trifluoroethyl)benzenesulfonamide	4-氨基-N-(2,2,2-三氟乙基)苯磺酰胺	Benzene and substituted derivatives	苯及其衍生物	Benzene and substituted derivatives	苯及其衍生物	C8H9F3N2O2S	277.019	254.034	1.334	M+Na	1.70725	4	0.7091	rp	389605-71-4	4962703	-	-	-	4272.55	3823.85	3763.55	4767.7	4536.15	4608.66	4133.88	3424.11	4526.8	4842.25	4040.51	4226.02	4901.86	5505.43	4231.96	4472.94	4430.79	4192.72	4336.88	3658.16	4698.34	4050.51	4178.68	4233.93	3937.85	3958.03	4008.05	3924.61
C18_positive	MW0011179	(3beta,22E)-26,27-Dinorergosta-5,22-dien-3-ol	-	Alcohol and amines	醇、胺类	Alcohols	醇类	C26H42O	353.325	370.324	6.5237	M+H-H2O	9.66844	3	0.7831	rp	38788-81-7	131750920	HMDB0029863	-	-	2741.25	2652.52	2724.8	2442.15	2495.78	2705.38	23710.3	25009	24916.5	24308.8	24765.8	27172.1	285.029	331.797	488.735	716.523	682.643	668.252	4809.53	7793.44	4617.87	2739.4	6691.28	6025.88	6568.15	6603.88	6544.51	6525.19
C18_positive	MW0103432	8-Hydroxyguanosine	8-羟基鸟苷	Nucleotide and Its metabolites	核苷酸及其代谢物	Nucleotide and Its metabolites	核苷酸及其代谢物	C10H13N5O6	322.077	299.087	1.2281	M+Na	5.08903	2	0.6905	rp	3868-31-3	135407175	HMDB0002044	44820	-	28453.8	27121	26389	26061.9	22882.5	22718.1	12710.9	13294.4	11740	14292.2	12612.5	11647.8	26899.5	29508.2	29727.7	29371.7	27614.1	32573.6	25277.9	19981.4	27304	24957.3	29065.9	28934.3	37998.2	36818.7	39000.9	38101.3
C18_positive	MW0007181	Flunixin	氟尼辛	Benzene and substituted derivatives	苯及其衍生物	Benzene and substituted derivatives	苯及其衍生物	C14H11F3N2O2	297.083	296.077	8.4442	M+H	4.12245	2	0.7261	rp	38677-85-9	38081	-	-	-	1201.16	1088.46	1712.52	1900.61	1041.23	1366.14	1833.95	1563.79	1419.29	1322.49	1167.26	1288.68	1701.16	4761.96	1031.82	967.673	1176.98	1075.12	1210.42	1083.64	1264.13	1259.21	2720.48	2251.9	22769.2	22774.1	23085.9	22575.9
C18_positive	MEDP1390	Carnitine C18:1	肉碱 C18:1	FA	脂肪酰类	CAR	酰基肉碱	C25H47NO4	427.361	425.351	8.2461	M+H	7.13493	1	0.7464	rp	38677-66-6	46907933	HMDB0005065	-	-	11228.6	15310	16567.3	17067.5	6906.84	9781.45	1354.2	949.986	936.519	326.268	1167.89	1978.55	2386.73	2524.05	5070.54	4769.72	2607.12	4191.35	3858.94	2264.22	3042.02	4466.64	5196.45	3604.61	8894.9	9091.91	9011.19	9002.75
C18_positive	MW0157526	Thiothece-474	-	Others	其他	Others	其他	C41H58O2	583.463	582.444	6.8446	M+H	19.4166	3	0.5702	rp	38647-31-3	23724693	-	-	-	28899	24672	22675.8	26871.3	25031.4	22033.2	22150.9	22608.6	25645.7	23244.4	25969.4	22189.3	33040	34486.1	22998.7	26421.8	24878.3	22363.7	30518.3	22354.6	28315.9	30856	28240.3	32163.7	23511.4	24574.3	24180.6	23129.9
C18_positive	MW0141079	1,2,3-Tris(chloromethoxy)propane	1,2,3-三(氯甲氧基)丙烷	Others	其他	Others	其他	C6H11Cl3O3	140.975	235.977	12.2674	M+2Na	4.0565	4	0.6582	rp	38571-73-2	62896	-	-	C19544	1524.65	1579.83	1864.99	2349.43	2080.93	2030.46	1372.3	2223.02	2694.36	1716.79	1908.98	1801.12	1923.13	3849.97	2738.87	2810.31	2001.88	1403.73	1857.58	1876.42	1842.98	1594.72	2231.03	983.756	2002.32	2025.8	2105.83	1928.16
C18_positive	MW0013009	2-azaniumylethyl (2R)-2-[(9Z)-octadec-9-enoyloxy]-3-(stearoyloxy)propyl phosphate	2-氮胺基乙基 (2R)-2-[(9Z)-octadec-9-enoyloxy]-3-(stearoyloxy)丙基磷酸酯	GP	甘油磷脂类	PE	磷脂酰乙醇胺	C41H80NO8P	768.546	745.562	12.2214	M+Na	0.674452	2	0.9448	rp	383907-18-4	46891779	HMDB0008993	-	-	16158.5	5493.89	15588.1	15662.1	17543.2	9090.9	36307.3	26251.9	53449.5	39770.8	46871.6	57132.3	16867.1	21352.3	9207.35	7804.77	26653.1	15383.6	5992.04	6363.34	14752.2	7581.48	18898.6	16941.2	30621.9	29303	32165.1	24522.7
C18_positive	MW0009348	(+)-Penbutolol	(+)-喷丁洛尔	Benzene and substituted derivatives	苯及其衍生物	Phenolics	苯酚类	C18H29NO2	292.236	291.22	6.8446	M+H	21.6954	2	0.8107	rp	38363-41-6	162302	HMDB0015447	-	-	1.44119e+06	1.27034e+06	1.34016e+06	1.6519e+06	1.41809e+06	1.45956e+06	1.43095e+06	1.35051e+06	1.56791e+06	1.39888e+06	1.41488e+06	1.34785e+06	1.70081e+06	1.87117e+06	1.42187e+06	1.39051e+06	1.58478e+06	1.27199e+06	1.59896e+06	1.30206e+06	1.5996e+06	1.72181e+06	1.87175e+06	1.73785e+06	1.41237e+06	1.42988e+06	1.41889e+06	1.38952e+06
C18_positive	MW0111099	Minoxidil	米诺地尔	Heterocyclic compounds	杂环化合物	Heterocyclic compounds	杂环化合物	C9H15N5O	227.164	209.128	6.4777	M+NH4	11.0799	2	0.6422	rp	38304-91-5	4201	HMDB0014508	1315	-	0.319	0.299	0.692	1.256	0.26	1.118	0.526	0.105	0.348	1.201	0.127	1.037	0.937	12.516	0.291	0.09	0.58	0.375	0.79	0.589	0.716	0.731	0.795	1.915	100.94	104.902	104.095	99.746
C18_positive	MW0121471	5-Fluoropyrimidine-2-carbonitrile	5-氟嘧啶-2-甲腈	Heterocyclic compounds	杂环化合物	Heterocyclic compounds	杂环化合物	C5H2FN3	124.024	123.023	12.5119	M+H	3.18825	4	0.6763	rp	38275-55-7	44181867	-	-	-	1734.47	2203.33	2776.9	1927.9	4040.63	1887.18	3053.51	2670.07	3152.16	2609.71	2123.28	2052	2115.54	2246.54	1855.91	2062.5	2784.16	2902.05	2612.09	2194.49	2288.07	2460.93	2257.58	2459.1	2656.07	2531.18	2642.13	2529.98
C18_positive	MW0016399	Carindone	卡林酮	Aldehyde,Ketones,Esters	醛、酮、酯类	Ketones	酮类	C31H44O6	477.308	512.314	8.3688	M+H-2H2O	15.2275	3	0.5734	rp	38045-62-4	101316738	HMDB0038189	-	-	15709.3	14990	7451.05	18803.1	11928.9	15868.2	17605.6	19281	21925.3	18002.5	16337.4	17435.9	16641.7	17688.3	14922	14713.5	17277.3	15728.3	18046	12578.4	20610.2	17908.5	19749.7	20995.7	15571	15677	15661.4	15702.8
C18_positive	MW0014937	Geranylacetone	香叶丙酮	Aldehyde,Ketones,Esters	醛、酮、酯类	Ketones	酮类	C13H22O	195.174	194.167	7.2073	M+H	0.246879	2	0.6304	rp	3796-70-1 | 689-67-8 | 68228-05-7	1549778	-	98068	-	1.763	1.341	1.105	2.476	1.409	1.455	0.594	1.618	0.587	0.954	0.726	0.718	1.406	4.7	0.689	1.571	2.218	1.224	1.767	1.811	1.014	0.518	2.586	1.378	69.766	67.41	67.902	66.395
C18_positive	MW0149024	Etacelasil	依他西尔	Heterocyclic compounds	杂环化合物	Heterocyclic compounds	杂环化合物	C11H25ClO6Si	355.07	316.111	12.1447	M+K	9.73375	4	0.5573	rp	37894-46-5	93200	-	-	C19131	19080.4	12462.1	12022.6	14082	11403.8	12682.6	6965.8	6898.98	9086.78	17168	8699.78	6660.41	5091.47	6493.38	11017.6	15621.9	12012.9	12181.9	18785.1	15958.5	52503.6	12794.7	8468.54	13001	16732	16526.9	13566.3	16526.1
C18_positive	MW0108644	N-Acetyl-L-phenylalanyl-3,5-diiodo-L-tyrosine	N-乙酰基-L-苯丙氨酸-3,5-二碘-L-酪氨酸	Amino acid and Its metabolites	氨基酸及其代谢物	Amino acid derivatives	氨基酸衍生物	C20H20I2N2O5	644.933	621.946	0.6718	M+Na	3.48568	4	0.92	rp	3786-07-1	440331	-	-	C04418	5146.81	7174.5	9304.49	9164.35	6278.14	7205.92	39762.9	30507.7	11870.6	32916	27403.8	38280.3	2226.35	261.323	2558.34	2648.55	1380.9	311.664	18512.5	4576.04	35079.2	26876.4	31873.2	34676	9558.39	9450.81	9352.39	9146.76
C18_positive	MW0118563	2-Heptylfuran	2-庚基呋喃	Heterocyclic compounds	杂环化合物	Heterocyclic compounds	杂环化合物	C11H18O	189.127	166.136	5.2226	M+Na	4.41325	4	0.651	rp	3777-71-7	19603	HMDB0036190	-	-	0.077	0.15	0.112	0.392	0.258	0.208	0.149	0.399	1.025	0.193	0.105	0.783	0.478	0.807	0.908	0.187	0.068	1.165	0.246	0.273	0.041	0.307	1.297	0.632	22.264	23.236	23.698	22.843
C18_positive	MW0106406	Dichlormid	二氯胺	Alcohol and amines	醇、胺类	Amines	胺类	C8H11Cl2NO	208.033	207.022	6.7536	M+H	7.67303	2	0.8429	rp	37764-25-3	37829	-	-	C18782	10154	9956.26	11107.5	12676	9954.28	10184.3	7892.25	9870.59	13208.5	11483.9	9157.07	7881.46	8150.77	11363.4	8430.97	8081.34	9226.34	11573.2	9001.98	11023.4	8219.35	8084.15	8808.02	9756.35	17598.4	17594.8	17765.6	17632.5
C18_positive	MW0106169	Citrulline	L-瓜氨酸	Amino acid and Its metabolites	氨基酸及其代谢物	Amino acids	氨基酸	C6H13N3O3	176.103	175.096	0.7474	M+H	1.39959	1	0.9192	rp	372-75-8	9750	HMDB0000904	16	C00327	8698.06	11813.7	163.982	12369.4	35.497	53.986	47866.6	33157.5	18224.8	40409.3	33667.5	43320.2	17.461	37.769	15.845	12947.8	14371.6	14872.7	28127.1	10699.1	43261.7	37687.9	23205	37899.5	31042.8	33074.6	31483.5	27186.8
C18_positive	MW0006545	Chlorophacinone	氯霉素	Benzene and substituted derivatives	苯及其衍生物	Benzene and substituted derivatives	苯及其衍生物	C23H15ClO3	357.068	374.071	9.684	M+H-H2O	3.56694	2	0.7711	rp	3691-35-8	19402	-	-	C18514	1.033	2.268	2.961	2.275	1.369	3.036	4.402	2.93	1.223	0.661	0.3	1.757	1.34	33.558	0.481	0.938	0.108	0.322	0.244	1.158	0.199	0.886	13.596	7.29	284.363	281.912	289.262	274.571
C18_positive	MW0160374	N-(indole-3-acetyl)-L-leucine	N-(吲哚-3-乙酰)-L-亮氨酸	Organic acid and Its derivatives	有机酸及其衍生物	Organic acid and Its derivatives	有机酸及其衍生物	C16H20N2O3	333.124	288.147	4.133	M-H+2Na	12.525	3	0.7458	rp	36838-63-8	688142	-	-	-	18600.6	15124.3	16737.1	19732	17091.9	17604.4	18807.2	18104.1	19908.9	17948.8	19693.6	16557.3	20377.4	22107.7	16876.7	18160.1	19662.1	16779.5	23578.6	17192.3	18463.7	21070.7	20118.7	21808.6	17337.2	15396.5	17736.2	16955
C18_positive	MW0125616	Neutral Red Base	中性红碱	Alcohol and amines	醇、胺类	Amines	胺类	C15H16N4	211.133	252.137	6.4284	M+H-COCH2	1.2415	4	0.7199	rp	366-13-2	11106	-	-	-	1.742	1.176	2.866	2.149	2.37	0.858	0.756	0.331	0.217	0.089	1.692	1.917	2.006	5.649	1.832	1.272	1.475	1.919	0.883	1.413	3.418	1.653	1.255	3.597	85.535	84.099	78.658	71.913
C18_positive	MW0121004	2-Methyl-5,7-dihydrothieno[3,4-d]pyrimidine	2-甲基-5,7-二氢噻吩并[3,4-d]嘧啶	Heterocyclic compounds	杂环化合物	Heterocyclic compounds	杂环化合物	C7H8N2S	191.001	152.041	6.7536	M+K	2.0475	4	0.7013	rp	36267-71-7	61951	HMDB0041565	-	-	1365.01	1562.48	1588.4	1802.38	1451.28	1706.6	1021.16	1391.99	1640.26	1577.85	1237.44	975.345	1187.64	1593.22	1176.87	1234.27	1673.33	1876.97	1233.62	1696.75	927.675	1214.71	1167.77	1293.05	2848.81	2871.91	2951.52	2874.04
C18_positive	MEDP1667	Phe-Glu	L-苯丙氨酰-L-谷氨酸	Amino acid and Its metabolites	氨基酸及其代谢物	Small Peptide	小肽	C14H18N2O5	295.129	294.122	1.9433	M+H	1.01982	1	0.8435	rp	3617-45-6	151134	HMDB0028994	23833	-	1123.83	1553.51	2162.08	1204.23	3215.7	2645.15	1166.38	703.848	881.037	1354.56	1471.35	1108.28	1089.17	1721.22	1154.32	1487.49	792.53	3358.04	1230.52	252.514	830.877	433.952	283.175	1214.09	6674.46	6963.13	6831.9	6796.83
C18_positive	MW0103063	Vaccinoside	牛痘苷	Terpenoids	萜类	Terpenoids	萜类	C25H28O13	519.139	536.153	11.7552	M+H-H2O	21.0332	2	0.583	rp	36138-58-6	56776351	HMDB0034733	-	-	482.153	379.014	573.736	945.312	456.35	282.787	675.863	556.749	546.7	800.65	541.893	443.121	419.05	1019.57	418.722	526.316	853.095	281.119	744.766	453.356	871.37	539.328	520.478	645.306	3912.48	3849.38	3723.41	3840.51
C18_positive	MW0017203	Citranaxanthin	柠檬黄素	Terpenoids	萜类	Triterpene	三萜	C33H44O	457.35	456.339	11.4712	M+H	5.43049	3	0.7578	rp	3604-90-8	6436724	HMDB0036883	-	-	11744.8	10871.2	11472.6	13728.8	12871	12833	16417.4	20908.4	20421.1	18599	19921.8	14098.8	12668.2	14776.3	12097.8	23332.4	13839.7	11370.6	26328.8	27059.5	15605.3	17241.3	19465.6	35159.5	18740	17670.3	16410.3	18875.8
C18_positive	MW0054114	Isopentenyl pyrophosphate	异戊烯焦磷酸	Organic acid and Its derivatives	有机酸及其衍生物	Phosphoric acids	磷酸类化合物	C5H12O7P2	515.008	246.006	0.6567	2M+Na	12.968	1	0.8113	rp	358-71-4	1195	HMDB0001347	6181	C00129	2.0885e+06	1.83171e+06	1.62174e+06	2.00229e+06	2.40353e+06	2.03651e+06	1.70048e+06	2.038e+06	3.04324e+06	1.95013e+06	2.30212e+06	1.8588e+06	1.79271e+06	2.28202e+06	2.23113e+06	2.08414e+06	3.10784e+06	2.58187e+06	2.41115e+06	2.85005e+06	1.74e+06	1.93874e+06	1.76262e+06	1.82327e+06	2.21752e+06	2.24984e+06	2.21688e+06	2.17346e+06
C18_positive	MW0063585	Solacaproine	索拉卡普罗因	FA	脂肪酰类	Others	其他	C18H39N3O	298.311	313.309	7.8595	M+H-CH4	44.2175	4	0.5548	rp	35771-90-5	423377	HMDB0034215	-	-	10038.6	9508.12	8575.57	13291.5	5843.67	7528.69	83444.5	34758.4	61689.3	71368.5	432582	67845.1	13511.6	12167.4	7975.26	10670.3	8377.66	5123.6	11550.8	8891.64	16494.4	16508.2	39199.1	25530.3	8992.15	8675.47	8565.87	7303.38
C18_positive	MW0112287	2-Tetradecylcyclobutanone	2-十四烷基环丁酮	Aldehyde,Ketones,Esters	醛、酮、酯类	Ketones	酮类	C18H34O	267.269	266.261	8.9349	M+H	5.0855	4	0.8877	rp	35493-47-1	566940	HMDB0037517	-	-	560974	605408	451939	503846	441925	212396	459901	449341	779020	461647	324860	475979	505815	577706	670989	505319	602671	510768	436020	485645	582854	444646	637679	418339	389613	371746	368845	336184
C18_positive	MW0123890	Ethidium	MIDI	Heterocyclic compounds	杂环化合物	Heterocyclic compounds	杂环化合物	C21H20N3+	158.093	314.166	5.7298	M+2H	5.69325	4	0.6261	rp	3546-21-2	3624	-	44366	-	2813.69	2382.99	2888.72	3298.97	2937.81	2997.25	2971.15	2954	3486.91	2746.86	2904.61	3006.85	3115.57	3703.99	2850.82	2656.93	3083.86	2617.8	3586.52	3071.3	2918.1	3713.18	2769.27	3793.72	2944.72	3117.43	3034.32	3042.76
C18_positive	MEDP1339	LPC(18:1/0:0)	LPC(18:1/0:0)	GP	甘油磷脂类	LPC	溶血磷脂酰胆碱	C26H53NO7P	523.359	522.356	9.0271	M+H	7.98019	1	0.7698	rp	3542-29-8	53480465	HMDB0010385	-	-	42820.6	23543.6	26665.1	39279.7	28741.1	44402.5	50992.3	57861.4	61774.2	52542.5	47726.6	46263.3	17001.9	20489.1	24192.1	19382.6	36338.3	62353.2	44216.3	79358.9	25967.7	30233.4	35614.7	30351.6	53223.1	52921	53642	53355.3
C18_positive	MW0056964	1-Stearoyl-2-arachidonoyl-sn-glycero-3-phosphocholine	PC（18：0/20：4（5Z，8Z，11Z，14Z））	GP	甘油磷脂类	PC	磷脂酰胆碱	C46H84NO8P	810.598	809.593	8.3536	M+H	1.06049	2	0.9292	rp	35418-59-8	16219824	HMDB0008048	-	-	18185.7	15119.1	17152.8	14506.3	13245.9	31763.8	4542.49	14225.8	12418.9	19552.1	15208.8	21309.7	23840.4	26582.1	22626.2	92851.4	20892.4	21102.9	14391.2	10430.2	14145.5	11406.8	19447.6	21247.9	34796	31688.8	31825.5	28009.3
C18_positive	MW0005721	5-Nonadecyl-1,3-benzenediol	5-Nonadecyl-1,3-苯二醇	Benzene and substituted derivatives	苯及其衍生物	Phenolics	苯酚类	C25H44O2	377.326	376.334	10.9142	M+H	37.827	4	0.5754	rp	35176-46-6	161858	HMDB0030956	-	-	49729.3	51424.5	49278.5	60026	56461	55145.1	64915.3	80479.1	80968.5	70057.1	67467.3	60940.1	57647.6	60073.5	53082.9	49654.2	52885	43194.6	62218.6	62652.9	67362	70823.3	76311.8	76314.1	58646	59375.6	58392.5	58684.4
C18_positive	MW0112938	(E)-beta-Damascone	(E)-β-大马士革	Aldehyde,Ketones,Esters	醛、酮、酯类	Ketones	酮类	C13H20O	193.162	192.151	0.823	M+H	9.65445	2	0.7325	rp	35044-68-9	5374527	HMDB0032541	-	-	4632.06	4471.1	4814.53	6631.61	4414.73	4911.01	8107.63	6170.94	5688.24	6795.4	6037.07	7098.42	6509.83	7737.72	4213.61	5444.25	3980.97	2624.73	6788.17	4289.02	6078.03	6726.49	7262.15	6527.68	6282	6249.01	6493.34	6229.16
C18_positive	MW0147209	Carpaine	卡帕因	Heterocyclic compounds	杂环化合物	Heterocyclic compounds	杂环化合物	C28H50N2O4	496.421	478.377	11.4601	M+NH4	22.1891	3	0.6367	rp	3463-92-1	442630	HMDB0030272	-	C10135	610890	597211	628903	353354	322070	657280	345397	938006	434949	760944	378872	672234	344551	394947	295811	311639	346306	285727	357562	344028	756601	427022	393758	848893	342451	337195	339388	339659
C18_positive	MEDL01874	Notoginsenoside T2	三七皂苷 T2	Terpenoids	萜类	Triterpene Saponin	三萜皂苷	C37H62O10	649.43	666.434	11.3691	M+H-H2O	0.408956	3	0.6261	rp	343962-54-9	131752528	HMDB0039050	-	-	2214.42	1585.95	2118.58	2453.8	3441.76	2024.46	1410.35	2289.88	2295.4	1937.43	1655.27	1834.92	2661.44	3616.25	1284.93	2852.81	2268.84	1965.49	3314.32	1903.8	1899.52	2096.2	1802.19	3047.21	2123.78	2244.81	2090.85	2178.05
C18_positive	MW0055397	Notoginsenoside T1	三七皂甙T1	Terpenoids	萜类	Triterpene	三萜	C36H60O10	635.414	652.419	10.7782	M+H-H2O	0.35701	3	0.6383	rp	343962-53-8	131752527	HMDB0039049	-	-	4297.3	3859.45	4321.36	4890.59	4669.92	4402.46	4161.71	6425.46	4831.53	4679.72	4664.73	4165.11	4592.59	5508.7	4382.27	3981.94	4585.21	3581.18	4298.46	3940.38	4276.75	4624.62	4629.72	4952.73	4260.8	4574.51	4481.77	4528.42
C18_positive	MW0122507	7-Methoxy-6-methylpteridine-2,4-diamine	7-甲氧基-6-甲基蝶啶-2,4-二胺	Heterocyclic compounds	杂环化合物	Pteridines and derivatives	蝶啶及其衍生物	C8H10N6O	165.09	206.092	4.0801	M+H-COCH2	0.9775	4	0.7262	rp	343347-40-0	822223	-	-	-	29.904	33.94	27.098	28.463	27.718	27.306	32.823	46.416	55.148	30.209	34.148	22.728	21.16	90.394	26.63	23.981	46.576	22.156	43.074	24.461	29.958	35.781	36.352	23.882	356.395	348.602	341.771	346.689
C18_positive	MW0169873	Spirilloxanthin	螺旋黄质	Terpenoids	萜类	Tetraterpenes	四萜	C42H60O2	614.484	596.459	10.7782	M+NH4	13.9548	3	0.6233	rp	34255-08-8	5366506	-	-	C15881	961822	892549	915571	1.08103e+06	1.01444e+06	1.02295e+06	1.04595e+06	1.38927e+06	1.31395e+06	1.12817e+06	1.11414e+06	988504	1.09793e+06	1.19775e+06	1.00833e+06	922598	1.02042e+06	853987	1.11026e+06	1.02404e+06	1.25836e+06	1.18503e+06	1.18348e+06	1.23021e+06	1.06466e+06	1.06021e+06	1.05159e+06	1.06084e+06
C18_positive	MW0016971	Celastrol	雷公藤红素	Benzene and substituted derivatives	苯及其衍生物	Benzene and substituted derivatives	苯及其衍生物	C29H38O4	473.265	450.277	7.7532	M+Na	2.87263	2	0.7868	rp	34157-83-0	122724	HMDB0002385	-	-	153377	189992	198116	181689	180429	133295	112449	150914	146892	133127	159842	126243	138576	175143	139169	131806	121569	132350	155129	152735	166987	157255	189012	153870	152167	151211	152309	151105
C18_positive	MW0013707	3-(5,5,6-Trimethylbicyclo[2.2.1]hept-2-yl)cyclohexanol	3-(5,5,6-三甲基双环[2.2.1]庚-2-基)环己醇	Alcohol and amines	醇、胺类	Alcohols	醇类	C16H28O	236.222	236.214	8.628	M+	22.6281	3	0.5522	rp	3407-42-9	103005	HMDB0031851	-	-	2461.09	2450.14	2299.57	2802.41	2594.02	2647.7	2532.23	3714.67	3374.21	2522.96	2955.72	2285.65	2640.3	2694.13	2226.87	2351.15	2606.25	2355.67	2953.34	2255.07	3087.06	2969.28	2974.27	2967.04	2541.19	2511.56	2504.09	2425.93
C18_positive	MW0103348	2'-Deoxyinosine 5'-monophosphate	2'-脱氧肌苷 5'-一磷酸	Nucleotide and Its metabolites	核苷酸及其代谢物	Nucleotide and Its metabolites	核苷酸及其代谢物	C10H13N4O7P	333.056	332.052	1.1827	M+H	8.225	3	0.6353	rp	3393-18-8 | 14999-52-1 | 16531-83-2	135398614	HMDB0006555	-	C06196	0.136	1.002	87.756	0.157	0.303	104.046	508.094	737.738	491.418	558.769	547.092	562.65	0.292	1.208	0.497	0.633	0.137	0.276	1212.32	856.578	1328.97	1185.8	1230.73	1363.04	219.365	218.157	220.371	212.645
C18_positive	MW0116677	1,3-Oxathiolan-2-one	1,3-Oxathiolan-2-one	Aldehyde,Ketones,Esters	醛、酮、酯类	Ketones	酮类	C3H4O2S	142.953	103.993	13.0275	M+K	1.99975	4	0.7024	rp	3326-89-4	72822	-	-	-	84771.9	15267	71914.6	75896.4	75263.5	204480	82182.1	85559.1	115032	74805.5	97311.6	61070.9	85592.7	93648.7	95677.4	65871.6	89442.7	84615.1	101672	147619	94055	77842.7	77059.6	86073.5	120111	102141	111870	114240
C18_positive	MW0012743	19-Noretiocholanolone	19-去甲肾上腺素	Aldehyde,Ketones,Esters	醛、酮、酯类	Ketones	酮类	C18H28O2	570.458	276.209	10.8233	2M+NH4	8.9701	2	0.6801	rp	33036-33-8	14009228	HMDB0005886	-	-	1.11431e+06	1.02019e+06	1.0547e+06	1.24826e+06	1.16867e+06	1.15892e+06	1.20191e+06	1.63345e+06	1.45035e+06	1.29186e+06	1.2648e+06	1.13923e+06	1.21167e+06	1.35484e+06	1.05136e+06	1.04249e+06	1.15352e+06	994179	1.26916e+06	1.16757e+06	1.31053e+06	1.33967e+06	1.40674e+06	1.40594e+06	1.18921e+06	1.20016e+06	1.18826e+06	1.18785e+06
C18_positive	MW0127056	6-Butyltetrahydro-2H-pyran-2-one	6-丁基四氢-2H-吡喃-2-酮	Aldehyde,Ketones,Esters	醛、酮、酯类	Ketones	酮类	C9H16O2	121.101	156.115	4.2689	M+H-2H2O	1.03405	2	0.7324	rp	3301-94-8	18698	HMDB0031514	-	-	0.498	0.53	0.356	0.988	0.592	0.24	1.069	1.217	1.003	0.716	1.143	0.781	0.661	6.488	0.395	1.29	0.591	0.433	0.387	0.735	0.233	1.168	0.468	0.644	89.951	91.03	88.044	95.772
C18_positive	MEDP1122	MG(16:0/0:0/0:0)	MG(16:0/0:0/0:0)	GL	甘油脂类	DG	甘油二酯	C19H38O4	331.285	330.277	11.172	M+H	2.23249	1	0.8996	rp	32899-41-5	3084463	HMDB0011564	-	-	22170.6	21952.5	18609.3	22605.6	19309.1	17894.8	15288	31126.6	29321.9	29024.4	30910.5	27798.3	18038.2	33053	19564.8	19778.4	18401.7	20143.2	22223.8	24775.7	20512	30080.5	21303	26042.9	20574.6	20368.3	20589.2	20358.8
C18_positive	MW0106514	DL-Leucine	DL-亮氨酸	Amino acid and Its metabolites	氨基酸及其代谢物	Amino acids	氨基酸	C6H13NO2	132.102	131.095	1.2432	M+H	0.272186	1	0.9545	rp	328-39-2 | 25322-63-8 | 25988-64-1 | 7005-03-0	857	HMDB0062203	-	-	15602.3	13859.5	14433.5	13683.6	21027.7	22206	31160.2	31538.8	57583.5	31799.3	34835.2	33808.8	13986.6	11210	14902.8	13648.9	17155.6	14824.2	26805.3	18829.3	23224.6	28994	18901	23184.7	50236.8	51656.8	51391.1	50491
C18_positive	MW0125873	Nomifensine maleate	马来酸诺米芬新	Benzene and substituted derivatives	苯及其衍生物	Benzene and substituted derivatives	苯及其衍生物	C20H22N2O4	239.163	354.158	6.5465	M+H	21.4326	2	0.8022	rp	32795-47-4 | 24524-90-1	5358907	-	44345	-	44.88	24.317	27.337	31.706	20.554	21.992	13.261	13.009	4.106	11.753	13.126	15.214	24.944	119.565	52.509	25.733	34.26	20.007	25.007	34.52	41.069	51.05	39.071	48.284	542.592	551.254	546.985	547.127
C18_positive	MW0113023	3-Galactosyllactose	3'-半乳糖半乳糖	Carbohydrates and Its metabolites	碳水化合物及其代谢物	Sugars	糖类	C18H32O16	568.171	504.169	4.133	M+CH3CN+Na	23.5539	2	0.6244	rp	32694-82-9	189088	HMDB0006599	-	-	32029.2	26450.1	27942.6	32961.7	30800.6	30475.9	30044.7	31578.7	34668.1	34017.5	32361.7	28337.7	32371.8	38746.8	28690.1	29533.1	31086.6	27049.5	36285.3	29938.3	31434.8	35442.7	32738.9	34156.4	29685.2	29645.6	30008.9	29071.1
C18_positive	MW0112021	2-[(6-Ethoxy-1,3-benzothiazol-2-yl)sulfanyl]-1-phenylethanone	2-[(6-Ethoxy-1,3-benzothiazol-2-yl)sulfanyl]-1-苯乙酮	Benzene and substituted derivatives	苯及其衍生物	Benzene and substituted derivatives	苯及其衍生物	C17H15NO2S2	368.019	329.054	13.0123	M+K	1.0505	4	0.7244	rp	326007-75-4	796581	-	-	-	16842.2	47909.5	42436.6	47062.4	39169.9	47743.1	47106.7	73458	28358	43053.9	46369.4	34483.2	57227.3	128890	39740.9	46440.5	56953.7	42182.4	48171.2	47778.7	60585.2	54097.7	58556.9	47023.4	32631.3	34457.3	33111.6	32626.7
C18_positive	MW0107905	L-Lysinamide	赖氨酰胺	Alcohol and amines	醇、胺类	Amines	胺类	C6H15N3O	184.082	145.121	0.5499	M+K	1.2805	4	0.719	rp	32388-19-5	439605	-	-	C01930	366.43	779.771	480.364	976.853	915.761	526.009	882.553	933.602	1299.27	951.54	1074.43	652.88	1058.02	1081.58	927.85	950.111	1149.94	1644.5	1094.52	1038.56	1135.09	1204.42	1482.07	1394.3	1421	1394.74	1369.62	1446.61
C18_positive	MW0104370	(Sulfooxy)acetic acid	2-(磺氧基）乙酸	Organic acid and Its derivatives	有机酸及其衍生物	Organic acid and Its derivatives	有机酸及其衍生物	C2H4O6S	156.981	155.973	13.7555	M+H	10.3535	4	0.548	rp	3233-46-3	17982876	HMDB0124940	-	-	2061.27	1942.49	2060.78	1778.35	2166.93	1817.93	2111.25	1724.95	2450.91	2211.22	1892.82	1683.84	2001.12	2359.43	1529.09	1226.68	2036.86	1691.08	2106.12	2184.46	1479.78	1973.05	2311.24	2133.59	2143.57	2103.14	1966.46	2054.95
C18_positive	MW0165134	(Z)-2-((R)-1-((S)-1-(2-Chlorophenyl)-2-methoxy-2-oxoethyl)-4-mercaptopiperidin-3-ylidene)acetic acid	(Z)-2-((R)-1-((S)-1-(2-氯苯基)-2-甲氧基-2-氧乙基)-4-巯基哌啶-3-亚丙基)乙酸	Organic acid and Its derivatives	有机酸及其衍生物	Organic acid and Its derivatives	有机酸及其衍生物	C16H18ClNO4S	356.069	355.065	4.6673	M+H	3.7335	4	0.6649	rp	317322-48-8	71712269	-	-	-	3643.08	2271.41	2461.44	3598.03	2629.37	2363.34	2615.93	3259.98	3613.74	2704.19	2563.35	2733.66	2084.35	2798.29	1715.86	2762.89	2531.2	2200.03	2147.72	3323.8	2348.53	3930.3	2993.19	2570.67	2298.18	2564.01	2487.54	2499.18
C18_positive	MW0137752	Coumestrol dimethyl ether	香豆酚二甲醚	Heterocyclic compounds	杂环化合物	Heterocyclic compounds	杂环化合物	C17H12O5	297.083	296.068	10.7482	M+H	18.4061	2	0.6568	rp	3172-99-4	2785731	-	48334	-	25.736	17.536	46.191	48.71	35.169	58.85	107.877	78.942	62.996	30.743	23.797	24.693	34.946	332.194	8.958	17.622	14.365	14.51	14.001	19.854	24.503	28.525	174.086	130.562	2463.21	2434.59	2432.89	2450.59
C18_positive	MW0111890	2-(2-Methoxyethoxy)ethanamine	2-(2-甲氧基乙氧基)乙胺	Alcohol and amines	醇、胺类	Amines	胺类	C5H13NO2	105.069	119.095	4.7489	M+H-CH3	4.07175	4	0.6579	rp	31576-51-9	520530	-	-	-	6.958	2.188	9.744	10.72	2.877	6.102	4.998	3.782	5.966	8.808	8.501	8.037	7.978	9.032	4.567	3.718	5.313	5.136	5.762	6.435	7.308	8.996	5.034	3.13	99.204	108.565	101.987	104.781
C18_positive	MW0105588	Allopurinol	别嘌醇	Heterocyclic compounds	杂环化合物	Heterocyclic compounds	杂环化合物	C5H4N4O	137.046	136.038	1.4702	M+H	0.552898	1	0.865	rp	315-30-0 | 180749-08-0 | 180749-06-8 | 73334-58-4 | 180749-09-1 | 180749-07-9 | 184789-03-5 | 291279-53-3	135401907	HMDB0014581	865	-	8944.38	7716.56	8354.19	8164.93	8602.71	8592.28	48289.2	41561.4	29184.6	48545.6	54622.3	46639.9	1578.24	858.78	2359.89	485.556	2727.54	2736.28	73999.6	36045.5	72416.8	60886.1	55721	68197.2	22170.6	20433.3	21011.2	21266.3
C18_positive	MW0125208	Monocrotaline	野百合碱	Heterocyclic compounds	杂环化合物	Heterocyclic compounds	杂环化合物	C16H23NO6	326.165	325.152	6.6004	M+H	12.6793	2	0.6926	rp	315-22-0 | 109525-74-8	9415	HMDB0034363	44128	-	1931.86	911.846	1772.17	1414.39	1711.46	1624.17	1732.28	2423.28	2008.87	1617.96	1406.35	1179.01	2514.1	2410.24	1923.16	1686.78	1228.79	1853.16	2472.34	1779.94	1350.89	2649.6	1987.94	2139.26	1973.01	1929.11	1948.65	1864.99
C18_positive	MW0009336	Paraoxon	对氧磷	Benzene and substituted derivatives	苯及其衍生物	Benzene and substituted derivatives	苯及其衍生物	C10H14NO6P	276.066	275.056	13.0047	M+H	4.73511	2	0.7361	rp	311-45-5	9395	HMDB0013035	-	C06606	241582	479392	209211	246117	407229	235228	188879	196097	254794	201611	204247	181045	173801	249893	188898	396442	221486	391548	229942	223282	511783	166340	269759	233871	304294	306602	332547	331715
C18_positive	MEDP0618	Carnitine-2-methyl-C4	2-甲基丁酰肉碱	FA	脂肪酰类	CAR	酰基肉碱	C12H23NO4	246.17	245.163	2.7653	M+H	1.35195	1	0.92	rp	31023-25-3	6426901	HMDB0000378	-	-	2155.75	1871.62	1978.56	1958.82	1917.01	2024.52	94.484	11079.7	145.912	97.481	120.838	30.794	2934.59	3521.57	3332.01	3439.05	2989.51	4356.1	36703.8	27807.8	32795.6	32889	35213	35015.9	6779.35	6799.07	6739	6685.43
C18_positive	MW0054160	Isovaleryl-l-carnitine	异戊酰左旋肉碱	FA	脂肪酰类	CAR	酰基肉碱	C12H23NO4	491.336	245.163	3.1607	2M+H	5.80016	2	0.7222	rp	31023-24-2	169235	-	-	C20826	2526.41	1480.12	2227.07	2785.74	2762.74	2340.73	2941.42	3533.14	3227.78	1569.95	3047.94	2399.03	1870.88	3166.71	971.236	2234.84	2521.74	871.364	2785.87	2298.48	3069.97	3030.17	2155.19	2716.35	2335.9	2291.83	2338.3	2393.62
C18_positive	MW0055241	N-acetylsphingosine	C-2神经酰胺	SL	鞘脂类	SPH	鞘氨醇	C20H39NO3	306.279	341.293	6.0815	M+H-2H2O	2.1032	2	0.8381	rp	3102-57-6 | 195194-58-2	5497136	-	411	-	9742.67	8990.94	10594.1	11692.4	7893.55	8110.38	71700.2	56416.3	71663.7	58562.7	55118.6	56976.9	6502.1	5554.23	6366.79	7834.91	9097.41	5196.85	30249.1	19057.7	38331.6	32131.3	34707.5	29156.4	16569.3	16929.8	16569.6	16895.7
C18_positive	MW0009434	Triethylphenylammonium	三乙基苯铵	Benzene and substituted derivatives	苯及其衍生物	Benzene and substituted derivatives	苯及其衍生物	C12H20N+	109.064	178.16	3.6921	M+H+K	6.06325	4	0.6192	rp	310-24-7	70525	-	-	-	1.463	0.795	1.623	2.106	1.887	1.442	2.038	2.658	1.056	0.836	1.078	1.213	0.745	15.778	1.442	1.34	0.876	0.431	1.673	1.327	1.732	0.966	0.453	1.373	115.677	118.223	123.592	117.79
C18_positive	MW0010982	(25R)-Delta(4)-dafachronic acid	-	Organic acid and Its derivatives	有机酸及其衍生物	Organic acid and Its derivatives	有机酸及其衍生物	C27H42O3	379.304	414.313	5.6838	M+H-2H2O	11.8153	2	0.6178	rp	309762-85-4	42628074	-	-	C20839	8882.1	8940.97	9332.01	10024.8	8680.01	9866.02	91564.8	102666	106279	106446	93661.3	96921.7	17821.1	18668.5	30137.6	15342.4	8228.97	4205.32	29960.7	19.446	58281.1	97783.2	37753.2	114995	40085	39503.4	39820.9	40454.2
C18_positive	MW0007841	Monoisobutyl phthalate	邻苯二甲酸单异丁酯	Aldehyde,Ketones,Esters	醛、酮、酯类	Esters	酯类	C12H14O4	223.097	222.089	6.3564	M+H	4.9178	1	0.8542	rp	30833-53-5	92272	HMDB0002056	-	-	3167.69	2592.02	4160.93	2476.67	3144.14	3233.44	918.585	1516.36	1018.8	780.492	1107.73	666.082	3974.46	3735.7	3385.88	3547.14	3671.44	3596.91	4260.34	3363.27	4662.24	5150.61	3784.01	4296.94	2208.03	2394.4	2296.56	2218.35
C18_positive	MW0054373	Linoleamide	亚油酰胺	FA	脂肪酰类	FFA	游离脂肪酸	C18H33NO	280.264	279.256	8.5666	M+H	4.463	4	0.65	rp	3072-13-7	6435901	HMDB0062656	-	-	8570.28	90723.4	10254.1	2139.15	9938.9	8364.32	2095.05	7904.14	9184.59	25052.5	2177.36	25235.7	184071	7014.49	8572.78	6246.5	4119.9	6594.03	13348.1	1516.81	1877.16	8419.28	31080.8	11204.4	2271.08	2330.83	2122.06	2248.03
C18_positive	MEDP2114	2-Amino-5-methyl-4-phenylthiazole	2-氨基-5-甲基-4-苯基噻唑	Benzene and substituted derivatives	苯及其衍生物	Benzene and substituted derivatives	苯及其衍生物	C10H10N2S	191.055	190.056	4.4094	M+H	21.811	1	0.6099	rp	30709-67-2	96129	-	45448	-	7881.51	7034.77	8692.66	8458.04	6516.08	6960.48	7102.58	7309.79	7846.27	7383.32	7614.8	7271.38	10434.9	13582.1	6981.46	7180.56	7533.27	6194.96	7081.02	6841.29	8408.84	7614.97	10365.8	10461.8	15097.9	15403	15715.3	14940
C18_positive	MW0015980	(3S,5S,9R,10S,13R,14R,17R)-10,13-dimethyl-17-[(E,2R)-5-methylhex-3-en-2-yl]-2,3,4,5,6,9,11,12,14,15,16,17-dodecahydro-1H-cyclopenta[a]phenanthren-3-ol	-	Hormones and hormone related compounds	激素及激素相关物质	Hormones and hormone related compounds	激素及激素相关物质	C26H42O	353.325	370.324	5.8064	M+H-H2O	14.1792	3	0.7483	rp	30674-32-9	101306924	HMDB0035845	-	-	260.055	783.707	270.231	114.316	40.472	29.125	26767.4	28656.2	27022.8	29591.6	27206.3	28858.7	4867.36	5650.36	7704.27	6584.85	7013.27	7684.35	5127.61	4672.98	4514.83	4049.58	4327.97	5991.9	13915	14089.8	13894.1	13871.3
C18_positive	MW0155645	Polidocanol	聚多卡醇	Alcohol and amines	醇、胺类	Alcohols	醇类	C30H62O10	605.424	582.434	10.1881	M+Na	1.20443	4	0.9708	rp	3055-99-0 | 9043-30-5	656641	-	-	-	13102.5	12917.5	12263.3	15452.7	13209.7	14490.2	13276.6	19705.5	17207.1	15378.3	14432.8	12964.4	14945	15274.4	11423.7	12375.1	14806.4	13061.3	13666.4	13651.4	14283.3	15388.5	16260.2	15662.6	14105.7	14270.8	14074.2	14079.7
C18_positive	MW0194064	Acetyl-L-carnitine	乙酰左旋肉碱	FA	脂肪酰类	CAR	酰基肉碱	C9H17NO4	204.123	203.116	0.8383	M+	2.40625	1	0.9269	rp	3040-38-8 | 14992-62-2	7045767	HMDB0000201	956	C02571	46988.5	41942.3	50327.2	51425.6	47549.2	44835.2	23819.2	22534.4	19256.9	26519.8	25808.5	24071.6	12776.7	20066.1	15156.7	16916.1	15008.7	24772.9	41943.7	31735.4	27297.6	36637.1	40964.9	35386.9	30460	29904.2	30847.7	30146.3
C18_positive	MW0063243	Pyrohyperforin	Pyrohyperforin	Terpenoids	萜类	Terpenoids	萜类	C35H50O4	517.371	534.371	10.2639	M+H-H2O	6.98982	3	0.5436	rp	303115-46-0	73808497	HMDB0035899	-	-	15270.5	14716	13757.4	17362.8	16332.4	14125.1	16904.9	26005.3	21306.3	18540.4	17496.3	15813.8	17763.9	18150.4	14668.9	14406	16329.8	14346.5	16849.5	15079.5	17162.2	18212.1	19685.5	20498.3	16332	16630.5	16393.2	15779.3
C18_positive	MW0016910	Cholesteryl oleate	胆固醇油酸酯	FA	脂肪酰类	CE	胆固醇酯	C45H78O2	689.558	650.6	9.9267	M+K	3.35384	4	0.6728	rp	303-43-5	5283632	HMDB0000918	-	-	1728.45	1746.11	3350.78	5151.07	3965.87	4810.54	8739.22	5817.48	8725.64	13463.1	12085	9406.15	5834.33	80.707	5789.91	1174.12	1158.39	1877.55	5802.64	62.402	15760.8	10786.6	9447.67	5935.2	5717.65	2928.55	5234.19	5315.66
C18_positive	MW0159826	Carbamate	氨基甲酸酯	Organic acid and Its derivatives	有机酸及其衍生物	Organic acid and Its derivatives	有机酸及其衍生物	CH2NO2-	102.009	60.0086	0.5499	3M+H+Na	11.6167	4	0.5297	rp	302-11-4 | 7224-09-1	276	-	-	-	308.487	288.334	332.486	355.014	338.837	474.464	516.475	553.725	866.234	611.83	435.61	412.276	337.3	536.071	841.145	585.543	846.18	989.84	1145.43	594.373	1193.79	709.602	1099.92	855.988	901.063	906.211	920.591	895.561
C18_positive	MW0144104	9,10-12,13-Diepoxyoctadecanoate	9，10-12，13-二环氧硬脂酸酯；9，10-12，13-二环氧硬脂酸	FA	脂肪酰类	Oxidized lipids	氧化脂质	C18H32O4	335.222	312.23	7.5996	M+Na	9.851	4	0.5555	rp	3012-69-9	18172	-	-	-	1140.24	892.143	851.083	1038.14	993	882.909	897.055	1562.77	1245.61	947.356	1007.09	917.048	991.694	1240.04	872.003	889.669	1061.21	819.721	971.324	1089.79	1005.51	1103.92	1155.25	1042.7	3114.68	3050.26	3206.78	2962.87
C18_positive	MW0127540	Oxydemeton-methyl	甲氧嘧啶	Others	其他	Others	其他	C6H15O4PS2	269.006	246.015	5.6991	M+Na	2.3435	4	0.9447	rp	301-12-2	4618	-	-	C18664	5529.51	5431.95	5641.31	7012.04	5194.16	6246.55	4756.32	5969.43	7285.4	5993.5	5502.94	4912.62	6841.25	7365.6	4959.1	5878.08	6215.6	5067.1	6621.44	6589.27	6866.01	6577.82	7029.36	7622.01	5316.2	5836.81	5688.93	5684.28
C18_positive	MW0158014	Treosulphan	硫磺菌素	Organic acid and Its derivatives	有机酸及其衍生物	Sulfonic acids	磺酸类化合物	C6H14O8S2	279.02	278.013	2.0191	M+H	0.81069	1	0.7819	rp	299-75-2	9882105	HMDB0042046	-	C19557	8536.84	4675.12	6462.24	6620.63	7557.39	7829.48	7618.13	6579.62	10030.9	8376.23	8555.63	7376.98	8164.96	7186.19	6515.77	6458.81	7336.65	5253.48	8226.63	6379.05	10297.5	7152.33	7074.61	9323.5	3533.93	3503.05	3566.88	3598.8
C18_positive	MW0138932	Methoxsalen	花椒毒素	Heterocyclic compounds	杂环化合物	Heterocyclic compounds	杂环化合物	C12H8O4	181.026	216.042	3.2666	M+H-2H2O	7.58524	2	0.6627	rp	298-81-7	4114	HMDB0014693	-	C01864	97.025	23.851	21.73	69.302	30.103	103.457	359.007	41.632	501.556	71.448	85.494	30.399	1436.89	104.014	602.115	526.708	1311.17	31.501	1101.46	34.479	1770.32	1017.71	1807.48	1299.06	864.226	864.215	868.081	865.431
C18_positive	MW0157294	Sulfobromophthalein	磺溴酞	Heterocyclic compounds	杂环化合物	Heterocyclic compounds	杂环化合物	C20H10Br4O10S2	832.584	793.641	12.1902	M+K	14.9933	4	0.7363	rp	297-83-6	5345	-	-	-	12104.2	13284.4	12956.2	16990.5	13799.1	14691	21636.7	48968.3	24857.7	27698.6	33105.2	39271.6	54440.9	70069.9	10248	17630.6	15248	10277.5	10612.1	10026.2	3451.88	7129.09	11948.2	20029.6	37200	35906.5	41446.9	23865.1
C18_positive	MW0049807	1-Palmitoyl-2-oleoyl-sn-glycerol	1-十六烷酰基-2-(9Z-十八烯酰基)-sn-甘油	GL	甘油脂类	DG	甘油二酯	C37H70O5	577.519	594.522	10.6269	M+H-H2O	10.5992	2	0.7493	rp	29541-66-0	5282283	HMDB0007102	4260	C13861	15943.1	9120.99	9355.11	17180.5	7951.31	7851.95	22641.1	21564.3	20424.7	18702.8	19787.4	18580.7	11496.1	21129.7	14439.7	12995.4	15113.7	7197.98	21548.2	22002.1	25563.4	27855	28080.6	33298.3	12224.5	11137.1	12351.8	12351.5
C18_positive	MW0160468	Hydrogen phosphate	磷酸氢盐	Others	其他	Metal, Non-metal and related compounds	金属、非金属及相关物质	HO4P-2	98.9839	95.9612	0.7816	M+H	0.670527	3	0.8736	rp	29505-79-1	3681305	-	-	-	68630.8	52014.5	51462.9	58189.3	70976.6	44461.4	66347.2	72844.3	75467.8	66191.4	74869.5	66368.2	40844.3	54763	60530.9	54615.9	73017.7	59783.2	71488.1	68499	34028.6	57454.1	55742	61793.6	59311.9	58734.1	60036.9	59530.8
C18_positive	MW0048980	Cohibin D	辅酶D	Aldehyde,Ketones,Esters	醛、酮、酯类	Esters	酯类	C37H68O4	549.488	576.512	10.3853	M+H-C2H4	2.1493	4	0.6991	rp	293735-22-5	10627002	HMDB0035398	-	-	2753.02	3624.61	5801.71	5141.94	6718.74	3697.01	3857.32	2466.69	3567.87	4202.99	3115.95	2840.63	1877.31	3193.73	1142.11	216.534	1679.39	3257.67	4940.59	4800.81	6962.79	3652.33	3345.87	4472.48	3028.34	2555.12	2310.56	2925.7
C18_positive	MW0123325	Ciclopirox	环吡酮	Others	其他	Medicine	药物	C12H17NO2	230.112	207.126	3.221	M+Na	7.32225	4	0.5967	rp	29342-05-0	2749	HMDB0015319	-	-	22.253	252.044	17.871	886.263	5.855	290.114	2854.69	2252.18	2504.11	2955.57	2889.18	2792.47	239.849	214.805	591.276	348.134	535.383	600.612	393.617	328.599	433.226	16.672	516.188	641.189	411.639	171.708	382.623	375.055
C18_positive	MW0153801	methyl 7-[(1R,2R,3R,5S)-2-[5-(2-fluorophenyl)-3-hydroxypent-4-ynyl]-3,5-dihydroxycyclopentyl]heptanoate	7-[(1R,2R,3R,5S)-2-[5-(2-氟苯基)-3-羟基戊-4-炔基]-3,5-二羟基环戊基]庚酸甲酯	Benzene and substituted derivatives	苯及其衍生物	Benzene and substituted derivatives	苯及其衍生物	C24H33FO5	407.229	420.231	2.7045	M+H-CH2	4.27739	4	0.6537	rp	291303-34-9	59734625	-	65496	-	54.51	51.082	122.795	68.263	68.343	87.849	1017.25	1244.83	1052.42	1198.84	965.84	958.785	2.819	32.812	16.214	7.094	5.176	39.865	72.181	39.309	26.828	67.345	56.531	47.744	314.59	316.482	305.027	275.162
C18_positive	MW0122805	Alprazolam	阿普唑仑	Heterocyclic compounds	杂环化合物	Heterocyclic compounds	杂环化合物	C17H13ClN4	372.102	308.083	10.7482	M+CH3CN+Na	9.45482	2	0.5847	rp	28981-97-7	2118	HMDB0014548	-	C06817	54.742	90.134	134.786	166.623	61.62	212.957	201.136	112.485	134.546	30.64	46.495	51.605	55.788	494.159	360.631	41.644	61.995	67.646	89.057	117.297	552.975	66.728	303.438	216.714	3363.37	3352.99	3325.89	3344.93
C18_positive	MW0104776	2-Hydroxyglutarate	2-羟基戊二酸	Organic acid and Its derivatives	有机酸及其衍生物	Organic acid and Its derivatives	有机酸及其衍生物	C5H8O5	214.988	148.037	12.982	M-2H+3Na	3.99832	2	0.7204	rp	2889-31-8	43	HMDB0059655	-	C02630	567607	581124	453753	489723	526699	555005	472033	831664	570646	462174	473173	404591	547989	637396	458542	483315	515133	363003	529416	449158	560202	522359	523602	617661	492434	497512	510707	480874
C18_positive	MW0107656	Arginine, ethyl ester	精氨酸乙酯	Amino acid and Its metabolites	氨基酸及其代谢物	Amino acid derivatives	氨基酸衍生物	C8H18N4O2	220.178	202.143	8.026	M+NH4	1.75126	2	0.7077	rp	28696-31-3	439495	-	-	C01404	2952.47	3015.14	3032.1	3806.36	3446.86	3179.93	2953.81	4557.36	3626.12	3251.55	3152.76	3252.34	3556.53	3555.58	3101.47	2796.5	3065.07	2878.97	3575.61	3255.95	3524.32	3355.9	3280.23	3478.22	3583.51	3505.54	3502.01	3454.43
C18_positive	MW0150782	Hexadecasphinganine	鸟嘌呤六水合物	SL	鞘脂类	SPH	鞘氨醇	C16H35NO2	274.275	273.267	5.8217	M+H	2.39627	3	0.5568	rp	28457-97-8	656816	-	-	-	368984	292510	343523	423499	356695	440070	355906	578848	633443	329861	357321	373032	548461	516119	508479	428079	508820	284783	670965	385174	650603	588647	555554	606187	536384	557118	543795	545347
C18_positive	MW0063326	Reticulataxanthin	网状紫杉素	Terpenoids	萜类	Triterpene	三萜	C33H44O2	455.334	472.334	11.7786	M+H-H2O	6.65683	3	0.8539	rp	28368-09-4	131752077	HMDB0036882	-	-	5049.82	6746.69	6913.31	10440.7	11934.6	8020.23	22046.9	21472.6	23051.4	17258.3	13401.1	14774.9	9660.45	7560.03	6364.02	10142.9	8903.85	5602.38	15579.7	9039.88	10116.4	19185.4	22314.2	19299.2	4906.61	3311.89	5181.89	5084.51
C18_positive	mws0120	Choline Alfoscerate	sn-甘油-3-磷酸胆碱	GP	甘油磷脂类	PC	磷脂酰胆碱	C8H20NO6P	258.111	257.103	0.7474	M+H	2.05603	1	0.9531	rp	28319-77-9	657272	HMDB0000086	370	C00670	51071.7	75467.4	83348.4	54730.3	105253	100307	116652	114730	58292.9	181118	142251	158770	62009.1	60494	50599.5	56369.4	21062.1	11824.8	76888.7	14558.9	88639.2	75126.5	79665.9	88050	171841	173873	172453	172296
C18_positive	MW0014099	beta-Elemolic acid	β-榄香酸	Organic acid and Its derivatives	有机酸及其衍生物	Organic acid and Its derivatives	有机酸及其衍生物	C30H48O3	421.346	456.36	7.7225	M+H-2H2O	2.67439	2	0.6274	rp	28282-54-4	4481462	HMDB0034961	-	-	56549.7	8445.61	51764.5	36479.5	50137.8	52909.7	62994.4	3599.42	3203.17	58923.2	3466.54	2889.62	58187.7	71286.2	53004.4	48821.4	57686.2	49896.7	67756.6	36952	59076.2	47900.9	58084.8	59054.4	56873.1	58438.4	56766	56880.8
C18_positive	MW0111188	MELAMINE, N(sup 2),N(sup 2),N(sup 4),N(sup 4)-TETRAMETHYL-	三聚氰胺, N(sup 2),N(sup 2),N(sup 4),N(sup 4)-四甲基-	Alcohol and amines	醇、胺类	Amines	胺类	C7H14N6	183.137	182.128	8.3382	M+H	2.51375	4	0.6909	rp	2827-47-6	17805	-	-	-	9.823	10.472	14.907	11.089	7.307	6.766	7.711	8.406	13.195	2.177	11.749	8.605	4.273	33.383	6.066	12.898	18.276	16	15.972	11.375	17.534	10.384	6.405	17.395	139.06	155.518	147.824	148.76
C18_positive	MW0055114	Monoerucin	单芥菜素	FA	脂肪酰类	Others	其他	C25H48O4	451.329	412.355	9.0731	M+K	11.4943	4	0.5314	rp	28063-42-5 | 5389-95-7	5378924	-	-	-	22.321	105.808	161.88	68.339	95.353	12.552	676.22	690.763	603.422	814.085	667.133	680.824	15.253	22.197	118.384	56.958	43.136	41.41	1164.8	1307.5	1097.48	1131.26	1226.7	1261.02	175.638	240.024	226.857	251.804
C18_positive	ZINC70455329	p,p-Bis(1-aziridinyl)-N-(p-tolyl)phosphinic amide	P，P-双（1-氮丙啶基)-N-(对甲苯基）次膦酰胺	Benzene and substituted derivatives	苯及其衍生物	Benzene and substituted derivatives	苯及其衍生物	C11H16N3OP	276.066	237.103	0.4654	M+K	2.748	4	0.6858	rp	27824-40-4	617003	-	-	-	123395	101250	92204.7	123695	111607	131376	80487.6	87299.3	100332	101587	84316	129351	118746	113065	96144.5	104631	103893	97140.2	82212.7	65759.2	96025.1	120879	106706	124284	109016	110471	106875	108844
C18_positive	MW0002413	2,6-Bis(tert-butyl)-4-(4-morpholinylmethyl)phenol	2,6-双(叔丁基)-4-(4-吗啉基甲基)苯酚	Benzene and substituted derivatives	苯及其衍生物	Benzene and substituted derivatives	苯及其衍生物	C19H31NO2	264.233	305.236	5.1066	M+H-COCH2	1.30175	4	0.7185	rp	2773-50-4	76014	-	-	-	600.515	399.756	426.397	709.022	676.454	584.839	723.262	1535.06	692.911	882.126	837.236	699.037	732.004	273.765	451.654	127.742	321.292	600.123	662.517	225.712	580.779	430.154	855.639	250.175	751.197	771.764	722.67	784.245
C18_positive	MW0107887	N-linoleoylglycine	亚油酰甘氨酸	Amino acid and Its metabolites	氨基酸及其代谢物	Amino acid derivatives	氨基酸衍生物	C20H35NO3	320.259	337.262	5.243	M+H-H2O	1.74564	2	0.7812	rp	2764-03-6	6433346	-	43426	-	222.822	465.645	55.402	267.737	328.535	150.565	9742.53	10980	10101	12096.3	11428.6	12111.6	2305.66	4916.93	5413.14	5493.46	6738.84	5098.88	10077.3	10933.6	9240.2	8845.46	8569.86	8472.39	10333	10155.2	10259.4	10173.6
C18_positive	MW0125789	Niaprazine	尼亚拉嗪	Heterocyclic compounds	杂环化合物	Heterocyclic compounds	杂环化合物	C20H25FN4O	357.215	356.201	2.4615	M+H	1.90075	4	0.7047	rp	27367-90-4 | 119306-37-5 | 119328-74-4	71919	-	-	-	2.503	1.219	6.361	24.969	25.059	4.884	49.447	3.653	1.348	3.333	2.047	7.503	9.372	2.647	1.721	11.484	5.508	15.795	11.138	1.313	3.072	80.953	4.746	18.742	117.495	123.484	119.419	111.355
C18_positive	MW0056955	PC(18:0/18:2)	PC(18:0/18:2)	GP	甘油磷脂类	PC	磷脂酰胆碱	C44H84NO8P	786.601	785.593	8.3688	M+H	0.349739	2	0.7223	rp	27098-24-4	6441487	HMDB0008039	-	-	275458	243715	216641	178000	164501	585186	76791	82629.6	221687	79741.4	120350	155892	308417	327425	236355	242086	279827	1.03221e+06	120649	99145.5	117532	110690	94409.9	93008	250424	248009	234633	193678
C18_positive	MW0056887	1-Palmitoyl-2-oleoyl-sn-glycero-3-phosphocholine	2-Oleoyl-1-palmitoyl-sn-glycero-3-phosphocholine	GP	甘油磷脂类	PC	磷脂酰胆碱	C42H82NO8P	760.586	759.578	4.6432	M+H	4.5797	2	0.9487	rp	26853-31-6	5497103	HMDB0007972	-	-	4275	3383.57	1202.54	1679.58	1399.61	667.136	913.428	543.337	1507.66	606.532	2034.07	2629.12	2529.28	4210.14	2882.74	3532.46	4592	2456.4	917.902	1307.23	1519.13	890.38	788.281	746.516	4954.65	5160.86	4957.55	3393.37
C18_positive	MW0144074	8-iso Prostaglandin F1a-d9	-	Hormones and hormone related compounds	激素及激素相关物质	Hormones and hormone related compounds	激素及激素相关物质	C20H27D9O5	348.317	365.313	6.5314	M+H-H2O	19.9563	2	0.6854	rp	26771-96-0	405240847	-	96411	-	71052.6	62897	33041.9	62151.9	63408.9	58279.2	90003.3	102264	170480	116111	116058	134441	621275	685704	555872	555215	579721	539864	633639	595337	596377	581820	540341	581791	30090.6	32071.1	31047.8	30661.6
C18_positive	MW0154818	Oxydeprofos	氧磷	Others	其他	Others	其他	C7H17O4PS2	243.027	260.031	1.0479	M+H-H2O	1.03125	4	0.7249	rp	2674-91-1	91523	-	-	C18984	221.462	177.295	206.697	236.429	452.931	655.258	43.452	81.494	12.33	58.67	117.019	477.656	83.437	378.544	81.7	146.004	150.221	29.486	256.831	14.479	518.385	100.781	391.543	133.962	273.939	274.223	193.299	255.359
C18_positive	MW0121049	1,2-Bis-(5-tetrazolyl)ethane	1,2-双-(5-四唑基)乙烷	Heterocyclic compounds	杂环化合物	Heterocyclic compounds	杂环化合物	C4H6N8	261.101	166.071	12.6938	3M+H+Na	8.8555	4	0.5711	rp	26670-16-6	141316	-	-	-	9741.01	17620.1	7386.96	8968.83	10975.9	20816.8	9915.81	9264.34	13206.4	8866.94	9029.95	10585.3	11914.3	8430.98	8009.87	11978.6	25297.6	7598.31	11607.7	7443.27	9443.71	9624.01	10352.9	12747.8	9672.41	9605.83	9976.54	9904.81
C18_positive	MW0055024	MG(18:2/0:0/0:0)	MAG 18:2	GL	甘油脂类	MG	单甘油酯	C21H38O4	355.285	354.277	9.4406	M+H	1.19136	2	0.7963	rp	26545-74-4	5283469	HMDB0242115	-	-	68342.7	48441	51256.9	81897.1	54211.4	56410.2	72644.9	91354.8	76442.3	66312.6	59040.5	72599.2	36941.6	71990.3	56633.4	76358.8	69762.7	40192.3	64944.1	65444.8	75204.1	79575.1	68872.7	70069.4	49587.2	52535.6	52541.6	54414.7
C18_positive	MW0053728	TAG 39:0	-	GL	甘油脂类	TG	甘油三酯	C42H80O6	703.574	680.596	11.6421	M+Na	15.4141	4	0.7313	rp	26536-12-9	117811	HMDB0031110	-	-	412344	415252	439060	834826	741509	279997	58896.8	240964	245002	441517	239487	100718	273560	22874	339003	367188	196262	224656	860529	31643.1	307571	366256	80626.7	422701	260150	229689	258460	249371
C18_positive	MW0011289	C22 Sulfatide	C22 硫苷	Others	其他	Others	其他	C46H89NO11S	864.627	863.616	9.9976	M+H	4.05447	2	0.7465	rp	265096-83-1	24779582	HMDB0012316	-	C06125	12295.6	10521.4	11214.2	13467.7	11931.8	12202.2	12256.7	16645.3	14704.9	11942.5	11852.8	10476.6	12841.6	12962.7	10521.5	11093.8	11952.4	10422.4	13355.3	12008.4	12644	13172.9	13872.2	13943	12281	11919.9	12246	12479.3
C18_positive	MW0116586	1,2-benzisothiazol-3(2H)-one	1,2-苯并异噻唑-3(2H)-一	Benzene and substituted derivatives	苯及其衍生物	Benzene and substituted derivatives	苯及其衍生物	C7H5NOS	189.976	151.009	13.4561	M+K	7.03875	4	0.6017	rp	2634-33-5	17520	HMDB0034413	-	-	824.041	1436.74	1009.53	1222.27	1158.91	1149.23	849.155	1171.84	1808.96	1051.06	1022.87	1052.03	1890.18	1155.93	1006.19	912.848	1151.44	909.764	911.834	1058.44	854.613	1114.07	1168.02	1181.64	2271.53	2445.96	2158.78	2355.87
C18_positive	MW0125396	N-(4-aminophenyl)-N-methyl-2-(4-methylpiperazin-1-yl)acetamide	N-(4-氨基苯基)-N-甲基-2-(4-甲基哌嗪-1-基)乙酰胺	Alcohol and amines	醇、胺类	Amines	胺类	C14H22N4O	301.141	262.179	8.7815	M+K	4.0965	4	0.9074	rp	262368-30-9	21927707	-	-	-	66558.7	39227.7	39963.1	69919.1	65403.5	104954	54780	70305.5	92902.7	65525.7	59651.1	69314.5	47457.4	62298.4	67778.1	64958.3	52492.1	48498.7	64854.3	33479.6	79330.4	60447.6	111898	79542	49391.3	49645.2	50410.1	49617.7
C18_positive	MW0193992	D-alpha-Aminobutyric acid	2-氨基丁酸	Amino acid and Its metabolites	氨基酸及其代谢物	Amino acid derivatives	氨基酸衍生物	C4H9NO2	121.101	103.063	4.9279	M+NH4	9.44105	2	0.5609	rp	2623-91-8	439691	HMDB0000650	-	C02261	3.922	2.897	1.203	2.573	3.07	2.757	1.939	2.494	0.734	2.84	2.013	1.929	2.709	10.646	1.74	1.699	1.905	1.311	1.123	2.398	2.611	2.027	3.23	0.946	113.072	113.569	113.505	111.943
C18_positive	MW0114590	Hexaethylene glycol	六甘醇	Alcohol and amines	醇、胺类	Alcohols	醇类	C12H26O7	283.175	282.168	10.8688	M+H	1.72375	2	0.9195	rp	2615-15-8	17472	HMDB0061822	-	-	68109.9	62590.1	63548.2	82025.9	74302.5	69034.7	84673.7	101832	88982.1	78395.2	83355	70087.9	77816.9	89685	67112.6	65279.3	71967.4	63039.2	80569.4	72595.3	86017.3	83722.3	86445.7	90940.3	76534.5	76669.1	77139.6	77139.5
C18_positive	MW0137399	Archangelicin	大天使素	Heterocyclic compounds	杂环化合物	Heterocyclic compounds	杂环化合物	C24H26O7	449.149	426.168	8.4746	M+Na	17.1428	2	0.6746	rp	2607-56-9	5281371	HMDB0030845	-	-	14442.1	13034.1	17173.8	20724.6	22238.6	465.704	539.226	30332	2852.76	31144.5	26474	24151.3	173.766	24667.5	8521.87	8985.37	665.574	15491.6	16681.1	17961.8	821.15	16281.6	352.463	681.385	11819.3	11818.8	11842.6	11571.8
C18_positive	MW0109598	Se-methylselenocysteine	硒甲基硒代半胱氨酸	Amino acid and Its metabolites	氨基酸及其代谢物	Amino acid derivatives	氨基酸衍生物	C4H9NO2Se	246.996	182.98	1.7425	M+CH3CN+Na	2.35424	2	0.723	rp	26046-90-2	147004	HMDB0004113	7019	C05689	3519.9	3263.81	4272.99	4232.48	3602.47	3500.19	3425.19	2470.09	3810.23	3858.16	3740.87	3255.72	5159.92	5233.22	2740.66	3116.41	3402.95	2873.81	3897.99	2902.44	3525.8	3045.91	5000.66	4988.98	4018.45	4055.39	4012.96	3849.98
C18_positive	MW0108877	N-oleoylglycine	N-油酰基甘氨酸	Amino acid and Its metabolites	氨基酸及其代谢物	Amino acid derivatives	氨基酸衍生物	C20H37NO3	340.286	339.277	9.8205	M+H	9.1395	4	0.8166	rp	2601-90-3	6436908	HMDB0013631	-	-	23432.5	22521.1	25047.5	22663.2	23932.5	22657.4	28.977	54.801	45.096	80.316	27.303	28.284	22927.6	25669.7	28282	27245.7	26764	28489.5	20.003	30.891	20.688	2997.44	59.056	93.354	5719.32	5653.01	5661.82	5649.25
C18_positive	MW0125279	N-(14-Methylhexadecanoyl)pyrrolidine	N-(14-甲基十六烷基)吡咯烷	Alcohol and amines	醇、胺类	Amines	胺类	C21H41NO	324.326	323.319	7.135	M+H	1.65582	3	0.8002	rp	260058-83-1	6430518	HMDB0034373	-	-	12402	10913.2	14233.4	11620.9	11651.7	13499.6	85915.3	76989.7	81315.7	91324.3	76160.6	91826.4	1367.17	2070.32	1580.66	1414.51	3331.54	5251.04	1903.71	6298.34	2959.71	1738.6	1621.59	2845.34	13164.8	13343.3	13263.8	13129.5
C18_positive	MW0054281	Lasalocid	拉沙里菌素	Organic acid and Its derivatives	有机酸及其衍生物	Organic acid and Its derivatives	有机酸及其衍生物	C34H54O8	591.387	590.382	10.8233	M+H	2.43342	2	0.7398	rp	25999-31-9 | 25999-20-6	5360807	-	-	-	4701.05	4118.26	4741.5	5447.61	4865.44	4828.74	4733.5	6381.85	6076.56	4741.09	4706.9	4578.03	4719.51	5779.27	4720.24	4221.3	4454.63	4150.8	3835.52	4675.01	5037.26	4974.67	4408.28	5178.56	4706.94	4830.51	4776.39	4762.4
C18_positive	MW0107973	Firefly luciferin	萤火虫萤光素	Heterocyclic compounds	杂环化合物	Heterocyclic compounds	杂环化合物	C11H8N2O3S2	281.006	279.998	4.4701	M+H	1.68452	2	0.9856	rp	2591-17-5	92934	HMDB0029713	65823	C02740	539213	465512	508982	554098	509642	486526	533112	556379	616959	524302	510251	508352	568182	661547	475747	469363	551050	439838	602286	470589	560279	544952	618908	609902	518828	517271	524580	510868
C18_positive	MW0111158	2-(2-Diethylaminoethyl)pyridine	2-(2-二乙氨基乙基)吡啶	Alcohol and amines	醇、胺类	Amines	胺类	C11H18N2	217.107	178.147	8.2461	M+K	12.4965	4	0.5177	rp	25877-30-9	96498	-	-	-	20637.4	19502.3	22747.3	24256	24703.4	43763.7	22720.7	21027.3	26156.7	24462.3	21944.2	18047	23283.6	22853.5	15793.1	8407.59	22458.7	20268.5	23742	21107.6	23721.3	23142.1	22657	24895.2	20320.7	19616.8	20871.3	20110.8
C18_positive	MW0149526	Gentamicin C2	庆大霉素C2	Others	其他	Medicine	药物	C20H41N5O7	486.296	463.301	9.2727	M+Na	13.8161	4	0.5006	rp	25876-11-3	72397	-	-	C02033	510.726	128.885	84.583	162.451	46.624	193.497	551.5	1477.19	812.112	1033.21	841.945	379.756	84.564	45.032	114.848	147.305	197.059	229.611	237.068	575.419	217.263	168.056	195.794	366.503	822.595	754.389	860.131	808.373
C18_positive	MW0158340	Tutin	图廷	Aldehyde,Ketones,Esters	醛、酮、酯类	Esters	酯类	C15H18O6	295.118	294.11	7.7532	M+H	4.154	4	0.9062	rp	2571-22-4	75729	-	-	C09570	15286.6	27279.8	27780.4	17284	24697.7	14836.3	10210.1	15961	13372	12913.3	18643.5	12167.7	12230.7	17845.5	13807.4	13623.2	10228.3	13680.3	14148.5	13318.6	19518.9	15262.5	25924.1	14916.9	18321.3	18361.2	18430.2	18514.6
C18_positive	MW0110759	L-threo-Sphingosine	L-苏式-鞘氨醇C-18	Alcohol and amines	醇、胺类	Alcohols	醇类	C18H37NO2	300.29	299.282	6.9125	M+H	2.67347	2	0.9343	rp	25695-95-8	11130338	-	45278	-	2320.83	3252.91	2368.34	2560.16	3381.08	3232.23	3845.74	5457.29	5839.03	5563.64	5425.69	4845.55	5240.73	4987.96	5444.39	5256.21	5778.47	8159.36	7893.3	5562.13	6305.4	4909.14	4627.26	6038.46	22716.8	22781.1	23117.1	22883.6
C18_positive	MW0106522	DL-Ornithino-L-alanine	DL-鸟氨酸-L-丙氨酸	Organic acid and Its derivatives	有机酸及其衍生物	Organic acid and Its derivatives	有机酸及其衍生物	C8H17N3O4	220.127	219.122	4.5004	M+H	4.76525	4	0.644	rp	25693-39-4	18320455	HMDB0029448	-	-	5856.98	5267.72	5340.71	5746.46	4995.28	5640.64	6301.26	5949.82	7122.69	5982.3	6003.18	5532.34	6075.04	6640.4	5486.68	5339.04	5360.31	4314.53	6225.93	5572.26	5567.67	6894.68	6936.47	6907.53	5447.56	5028.42	5867.22	5622.81
C18_positive	MW0063662	Stearoylcarnitine	硬脂酰肉碱	FA	脂肪酰类	CAR	酰基肉碱	C25H49NO4	428.374	427.366	8.8889	M+H	0.746579	2	0.9323	rp	25597-09-5	52922056	HMDB0000848	5811	-	3642.38	3185.77	3139.75	3321.17	2590.66	2902.32	8104.43	7867.93	10526.4	10177.9	8085.97	9310.43	3076.4	3202.39	4271.93	4613.04	2832.41	5308.86	18780.1	15541.2	16848.3	20880.2	24170.8	20691.2	8341.7	8436.61	8395.53	8343.94
C18_positive	MW0112273	2-Phosphoglyceric acid	2-磷酸甘油酸	Organic acid and Its derivatives	有机酸及其衍生物	Organic acid and Its derivatives	有机酸及其衍生物	C3H7O7P	142.953	185.993	13.5403	M+Na+2K-H	9.84925	4	0.5556	rp	2553-59-5	59	HMDB0000362	-	-	9261.55	15222.7	6850.2	9599.72	49276.3	8412.78	18826.4	6781.3	13666.7	11833.9	9485.11	27699.1	35723.9	6497.66	6204.36	6580.02	25287	10059.4	17710.8	18878.1	9236.74	15157.9	15773.7	8450.82	21195.9	27088.7	21291.1	20843.9
C18_positive	MW0126093	Phenazine-1-carboxylic acid	吩嗪-1-羧酸	Organic acid and Its derivatives	有机酸及其衍生物	Organic acid and Its derivatives	有机酸及其衍生物	C13H8N2O2	225.061	224.059	9.6847	M+H	12.8065	2	0.5659	rp	2538-68-3 | 102646-59-3	95069	-	-	C21442	1.02	0.672	9.376	2.891	3.646	1.49	2.332	0.379	2.029	0.156	0.767	0.861	1.178	20.615	0.725	2.049	1.214	0.964	1.177	0.67	0.513	0.081	9.147	3.743	216.657	209.464	212.651	212.633
C18_positive	MW0140641	(2s)-2-(4-Chloro-2-methylphenoxy)propanoic acid	（S)-2-(4-氯-2-甲基苯氧基）丙酸酯；（S)-MecoProp	Benzene and substituted derivatives	苯及其衍生物	Benzene and substituted derivatives	苯及其衍生物	C10H11ClO3	252.998	214.04	7.4615	M+K	13.175	3	0.7118	rp	25333-13-5	85445	-	-	C20686	4112.69	3014.25	3894.78	4319.72	3977.58	4085.46	3347.87	3950.09	2824.28	3203.09	4022.98	3566.38	3956.78	5564.85	2484.93	2180.6	3875.17	4041.78	4041.62	3596.75	3895.65	4045.32	4268.53	6150.12	4016.01	3764.4	3958.62	4131.24
C18_positive	MW0126849	Trazodone hydrochloride	盐酸曲唑酮	Others	其他	Medicine	药物	C19H23Cl2N5O	407.124	407.128	4.133	M+	8.48997	1	0.6377	rp	25332-39-2 | 19666-36-5	62935	-	-	-	22647.9	19074.8	20035.2	22435.5	20270.6	20206	22039.2	21728.7	23339.3	25216.8	23269.3	20733.9	24671	27509.1	18993.8	20875.9	22334.1	18849.7	24066.3	21484.4	20235.6	23010.1	22275.3	23620.6	18472.2	17316.6	19214.3	18276.3
C18_positive	MW0054402	L-Octanoylcarnitine	L-辛酰基肉碱	FA	脂肪酰类	CAR	酰基肉碱	C15H29NO4	575.413	287.21	10.8233	2M+H	23.82	2	0.5587	rp	25243-95-2	11953814	HMDB0000791	-	C02838	33725.8	31563	31705.9	41936.3	36131.3	37985.5	40449.8	55470.8	52126.3	42673.6	43036	35671.8	34511.1	44042.5	34500.3	33801.9	38534.8	30771.6	40774.8	38452.8	42056	41847	44172.7	45593.2	39952.7	39919.4	40579.9	39901.8
C18_positive	MEDP1310	4-Hydroxy-l-tryptophan	4-羟基-L-色氨酸	Amino acid and Its metabolites	氨基酸及其代谢物	Amino acid derivatives	氨基酸衍生物	C11H12N2O3	221.092	220.085	2.4919	M+H	0.39612	1	0.6855	rp	25242-90-4	85479	-	-	C21777	3884.36	3170	3036.55	3548.73	3295.71	3309.11	10086.2	9132.28	10125.9	10079.5	10609.7	9510.61	2560.38	2830.55	2756.84	2866.64	2918.26	3101.83	6737.6	4785.24	5732.61	5481.32	5725.45	5826.44	8654.43	8658.63	8845.09	8451.24
C18_positive	MW0106627	Ethyl [(4-bromophenyl)amino]acetate	[(4-溴苯基)氨基]乙酸乙酯	Aldehyde,Ketones,Esters	醛、酮、酯类	Esters	酯类	C10H12BrNO2	558.987	257.005	4.4852	2M+2Na-H	2.8495	4	0.9336	rp	2521-92-8	302643	-	-	-	22487.7	20704.7	21345.5	25289.5	22795.5	21571.8	23834.7	23277.8	27413.3	24389.4	22829.3	23286.9	25546	28602.1	20853.7	20824.1	24338.6	17592.2	25506.7	19777.8	25684	25581.2	25502.5	26247	24394.8	24926.2	24095.3	24322.4
C18_positive	MW0148457	Diethyl phenyl phosphate	磷酸二乙基苯酯；磷酸二乙基苯酯	Benzene and substituted derivatives	苯及其衍生物	Benzene and substituted derivatives	苯及其衍生物	C10H15O4P	231.08	230.071	1.2281	M+H	0.51	4	0.7374	rp	2510-86-3	17280	-	-	-	69.27	77.366	80.02	57.706	135.307	56.496	379.216	703.361	1274.86	652.851	481.724	918.386	46.503	11.833	138.064	141.653	191.87	343.107	936.766	1638.32	195.173	344.566	587.235	629.994	659.27	636.334	624.951	682.391
C18_positive	FDATN01111	Rutin trihydrate	-	Others	其他	Medicine	药物	C27H36O19	687.177	664.185	0.6265	M+Na	4.39755	4	0.6513	rp	250249-75-3 | 207671-50-9	16218542	-	-	-	77.764	111.858	26.45	117.971	48.434	109.694	180.528	176.576	157.026	231.121	6.876	364.736	23.812	19.488	36.63	38.619	25.179	35.222	196.578	55.594	36.732	139.944	242.063	51.504	240.038	183.283	244.634	237.186
C18_positive	MW0114583	20-(4-(1,1,3,3-Tetramethylbutyl)phenoxy)-3,6,9,12,15,18-hexaoxaicosan-1-ol	20-(4-(1,1,3,3-四甲基丁基)苯氧基)-3,6,9,12,15,18-hexaoxaicosan-1-ol	Others	其他	Others	其他	C28H50O8	258.183	514.351	2.0115	M+2H	3.05007	4	0.6793	rp	2497-59-8	75622	-	-	-	331.502	232.116	376.265	316.477	282.064	300.06	2543.94	3006.97	2558.55	2663.03	1671.48	2897.54	303.64	62.239	131.915	161.592	16.214	83.751	65.372	23.686	76.947	171.305	64.048	30.518	221.539	173.397	226.809	250.432
C18_positive	MW0108946	Aceglutamide	N-乙酰-L-谷氨酰胺	Amino acid and Its metabolites	氨基酸及其代谢物	Amino acid derivatives	氨基酸衍生物	C7H12N2O4	206.114	188.08	5.7451	M+NH4	2.16026	2	0.7007	rp	2490-97-3	182230	HMDB0006029	-	-	31008.6	27093.1	24981.6	30615.3	29358.4	30159.1	32670.3	33884.7	36567.2	30870.4	31901.3	32160.9	35276	40402.4	30614.1	27876.8	29077.2	26959.9	34020.9	20015.7	34001.7	38966.4	34764.3	35969.5	32652.3	29320.2	34572.3	32008.2
C18_positive	MW0054884	Methyl dihydrojasmonate	二氢茉莉酮酸甲酯	Aldehyde,Ketones,Esters	醛、酮、酯类	Esters	酯类	C13H22O3	209.154	226.157	5.6838	M+H-H2O	7.76325	4	0.8392	rp	24851-98-7	102861	HMDB0031740	-	-	7.89	0.386	0.52	1.71	6.91	0.433	2.031	0.537	0.578	0.247	0.515	0.538	1.264	31.575	0.443	0.425	0.138	1.048	12.651	0.526	0.329	0.49	2.008	2.366	151.261	152.364	149.648	138.534
C18_positive	MW0168720	L-Allothreonine	L-别苏氨酸	Amino acid and Its metabolites	氨基酸及其代谢物	Amino acids	氨基酸	C4H9NO3	261.101	119.058	12.2674	2M+Na	13.0782	1	0.6871	rp	24830-94-2	99289	HMDB0004041	7007	C05519	50207.8	24679.3	30758.1	47838.8	32615.1	22334.1	35635.8	34452.2	40885.8	25459.7	23819.6	23162.6	43578.2	28089.8	34555.3	22074.6	35665.2	31540.9	23047.5	20662.7	36614.5	27976.5	39283.4	27328.3	29035.5	30390.9	29601.4	29350
C18_positive	MW0151663	Ile-Ala	伊莱阿拉	Amino acid and Its metabolites	氨基酸及其代谢物	Small Peptide	小肽	C9H18N2O3	203.139	202.132	1.9131	M+H	0.1	3	0.7349	rp	24787-73-3	7009577	-	64994	-	0.449	1.517	0.223	0.553	0.348	0.788	1.287	0.9	0.897	1.26	1.589	1.221	0.156	0.87	2.001	0.3	0.263	2.256	1.738	0.643	0.942	0.824	0.961	1.298	46.537	46.345	46.345	45.357
C18_positive	MW0116968	2-(prop-2-yn-1-ylsulfanyl)-1H-benzimidazole	2-(prop-2-yn-1-ylsulfanyl)-1H-苯并咪唑	Benzene and substituted derivatives	苯及其衍生物	Benzene and substituted derivatives	苯及其衍生物	C10H8N2S	226.999	188.041	1.4096	M+K	0.4525	4	0.7388	rp	24786-40-1	1734880	-	-	-	1023.87	1098.22	1141.89	1149.92	1064.38	707.853	1090.63	1266.09	1240.43	761.198	1185.04	1194.43	1097.67	1259.97	622.117	645.071	1244.58	947.439	1415.39	927.467	591.231	520.447	1318.78	458.06	1479.25	1506.6	1470.55	1473.2
C18_positive	MW0109825	8-[(1r,2r,5r)-2-(2-Carboxyethyl)-5-hydroxy-3-oxocyclopentyl]-6-oxooctanoic acid	8-[(1r,2r,5r)-2-(2-羧基乙基)-5-羟基-3-氧代环戊基]-6-氧代辛酸	Hormones and hormone related compounds	激素及激素相关物质	Hormones and hormone related compounds	激素及激素相关物质	C16H24O7	329.16	328.152	10.355	M+H	1.99175	4	0.9526	rp	24769-56-0	161468	-	36186	-	10811.2	10253	9274.63	11388.3	11137.7	10733.9	13207.8	17737.6	15897.9	14129.5	13662.7	11760.3	12367.7	10903.5	9343.48	8573.2	10446.6	9080.88	12976.7	12670.8	13212.5	13340.8	14312.2	15276.8	11229.6	11201.4	11029.7	10703.7
C18_positive	MW0118670	2-Methoxy-3-(2-methylpropyl)pyrazine	2-甲氧基-3-(2-甲基丙基)吡嗪	Heterocyclic compounds	杂环化合物	Heterocyclic compounds	杂环化合物	C9H14N2O	189.107	166.111	5.7298	M+Na	10.9673	4	0.5389	rp	24683-00-9	32594	HMDB0031860	-	-	1409.12	1267.74	1083.63	1939.96	1197.64	295.818	1548	685.615	1795.35	1211.54	737.478	1573.02	1945.24	1594.81	1650.51	1462.49	1261.53	1287.96	1047.77	1384.5	1373.48	2072.9	1040.62	1987.54	1273.56	1315.45	1345.41	1239.87
C18_positive	MEDP0401	5'-Deoxy-5'-(Methylthio) Adenosine	5-脱氧-5-甲硫腺苷	Nucleotide and Its metabolites	核苷酸及其代谢物	Nucleotide and Its metabolites	核苷酸及其代谢物	C11H15N5O3S	298.098	297.09	2.887	M+H	0.543917	1	0.9574	rp	2457-80-9	439176	HMDB0001173	3425	C00170	33316.6	39761.9	42833.5	44559.5	53106	37966	40481.2	37759.6	54478.1	46735.3	53090.8	47446.3	15951.8	20127.9	24799.9	20320.3	28198.4	41009	26374.3	20107.5	18294.1	20288.1	22758.4	19277.9	35711.9	35302.6	35066.2	35713.2
C18_positive	MW0111490	(2R,3R)-2,3-Butanediol	(2R,3R)-2,3-丁二醇	Alcohol and amines	醇、胺类	Alcohols	醇类	C4H10O2	73.0646	90.0681	8.3964	M+H-H2O	0.0679848	2	0.8172	rp	24347-58-8	225936	HMDB0033007	-	C03044	1138.09	1021.65	1276.43	1339.83	1101.3	1092.6	1129.17	1413.28	1404.18	1304.21	1161.09	1377.89	1292.72	1491.16	1144.17	1100.59	1169.28	1022.51	1218.14	1132.1	1327.44	1272.99	1473.71	1509.7	3315.06	4068.39	4124.32	4067.08
C18_positive	MEDTP01677	FFA(12:1)	顺-5-十二碳烯酸	FA	脂肪酰类	FFA	游离脂肪酸	C12H22O2	181.159	198.162	6.1091	M+H-H2O	1.06683	2	0.5518	rp	2430-94-6	5312378	HMDB0000529	5514	-	7.35	5.61	9.592	8.138	7.632	12.915	9.469	3.604	5.612	3.284	3.466	1.521	11.601	31.226	5.541	8.681	9.964	6.237	7.738	9.313	12.171	12.837	10.899	11.949	136.671	137.441	139.584	137.326
C18_positive	MW0013306	24-Methylcycloart-23-en-3beta-yl acetate	24-Methylcycloart-23-en-3beta-yl acetate	Aldehyde,Ketones,Esters	醛、酮、酯类	Esters	酯类	C33H54O2	483.409	482.412	10.884	M+H	21.8685	3	0.5649	rp	24278-47-5	131751890	HMDB0035967	-	-	251609	230069	224181	271413	254004	256422	265165	343301	326494	317602	279294	273676	260042	294020	225071	251646	252196	207282	276760	263513	290323	297207	299657	333558	266134	270851	265507	259667
C18_positive	MW0138816	Lunarine	卢纳林	Heterocyclic compounds	杂环化合物	Heterocyclic compounds	杂环化合物	C25H31N3O4	438.239	437.231	3.3878	M+H	1.94466	2	0.9181	rp	24185-51-1	6477011	-	43760	-	892.153	829.854	335.547	471.313	447.866	478.407	2381.5	1619.31	1884.64	2118.38	2234.32	2474.53	488.067	550.458	21.537	7.905	233.749	239.878	2320.38	989.199	3860.27	2706.16	2640.11	3427.91	2490.02	2451.24	2483.25	2456.68
C18_positive	MW0130336	2,3',4,5'-Tetramethoxystilbene	TMS	Benzene and substituted derivatives	苯及其衍生物	Benzene and substituted derivatives	苯及其衍生物	C18H20O4	301.142	300.136	9.7149	M+H	5.87399	2	0.9321	rp	24144-92-1 | 20578-92-1	5354004	-	64732	-	714056	637835	667722	770929	733216	728347	915790	950932	1.15016e+06	1.001e+06	857442	789245	827244	914540	710510	665780	734684	658908	799810	823116	831312	866165	1.03119e+06	956148	720313	706958	706696	693706
C18_positive	MW0105712	L-Argininosuccinic acid	精氨酸琥珀酸	Amino acid and Its metabolites	氨基酸及其代谢物	Amino acid derivatives	氨基酸衍生物	C10H18N4O6	291.131	290.123	0.7474	M+H	1.39378	2	0.9855	rp	2387-71-5	16950	HMDB0000052	5115	C03406	8.57	5.373	9.497	2.947	10.904	2.672	47641.6	36506.2	20549.2	40912.3	28272.1	46630.5	8.459	11881.9	5734.84	8.271	0.983	5365.89	33110.1	12729	42018	40133.9	44855.2	41813.3	9439.83	9704.77	9441.44	9526.11
C18_positive	MW0107951	L-Selenocystathionine	L-硒代胱硫醚	Others	其他	Others	其他	C7H14N2O4Se	308.974	270.012	1.1077	M+K	4.025	3	0.7542	rp	23809-95-2	441455	HMDB0006343	-	C05699	923.328	877.259	1316.59	1426.95	978.807	1171.22	1277.52	1146.83	1190.48	952.971	879.562	809.846	1905.46	1909.05	1309.37	653.692	1285.03	854.573	808.864	742.882	349.985	1002.75	1242.45	1346.09	1111.74	1140.44	1083.45	1133.51
C18_positive	ZINC28537544	(8S,9S,10R,13R,14S,17R)-17-[(2R,5R)-5-ethyl-6-methylheptan-2-yl]-10,13-dimethyl-2,7,8,9,11,12,14,15,16,17-decahydro-1H-cyclopenta[a]phenanthrene-3,6-dione	豆甾-4-烯-3，6-二酮	Others	其他	Others	其他	C29H46O2	427.357	426.35	10.7178	M+H	2.85938	4	0.9334	rp	23670-94-2 | 57458-57-8	5490007	HMDB38063	-	-	1744.22	10495.5	9677.54	12059.6	9308.99	9196	18.273	48.524	258.607	21.456	115.86	60.59	418.815	897.786	12.184	1577.6	1128.74	1869.05	702.954	383.15	446.986	436.762	296.531	469.411	654.199	683.665	709.278	689.066
C18_positive	MEDL02503	Carnitine C16:0	肉碱 C16:0	Alkaloids	生物碱	Alkaloids	生物碱	C23H45NO4	400.342	399.335	8.0284	M+H	0.885174	1	0.7384	rp	2364-67-2	-	HMDB0000222	-	C02990	49697.3	54086.6	56848.8	61854.6	43530.3	51005.2	17449.2	16165.9	18815	22342.3	18318.6	19294.9	31098.3	33330.9	40990.9	43976.8	28538.4	44816.9	66119.8	45682.1	58434.6	64618.9	74641.4	72548	46438.6	46157.8	46815.5	46342.3
C18_positive	MW0107223	Heptenophos	七磷	Organic acid and Its derivatives	有机酸及其衍生物	Phosphoric acids	磷酸类化合物	C9H12ClO4P	251.014	250.016	5.6991	M+H	23.9578	2	0.6485	rp	23560-59-0	62773	HMDB0031793	-	C18660	87026.4	71403	77789.9	94490.3	80475.5	80658	76701.3	83825.8	94781.3	79315.7	77662.5	76796.5	88935.9	95573.4	80849.1	80150.7	3883.92	69901.8	7602.82	78633.4	92761.2	91967	95928	97662	79942.3	87239.8	84107.8	84039.7
C18_positive	MW0107662	L-Aspartate-semialdehyde	L-天冬氨酸-4-半醛	Amino acid and Its metabolites	氨基酸及其代谢物	Amino acid derivatives	氨基酸衍生物	C4H7NO3	235.093	117.043	0.7474	2M+H	1.05	3	0.9911	rp	2338-03-6	439235	HMDB0012249	-	C00441	19.305	199.353	133.503	116.545	47.737	116.649	116.124	31.735	7.531	136.68	79.254	53.744	64.969	26.022	69.111	134.247	64.293	4.364	158.938	9.388	164.988	56.106	41.648	154.741	965.313	1017.4	987.934	978.716
C18_positive	MW0055321	Nivalenol	雪腐镰刀菌烯醇	Alcohol and amines	醇、胺类	Alcohols	醇类	C15H20O7	335.106	312.121	3.297	M+Na	6.69984	2	0.9065	rp	23282-20-4	5284433	HMDB0004304	64093	-	1500.49	1339.79	1759.56	1331.62	1497.58	1447.42	14632.7	14443.9	20199.7	15151	16022.9	15896.4	642.387	613.53	701.828	649.582	715.53	1185.18	20388.3	26142.1	16473.2	16221.3	14483.6	16297.1	6580.97	6550.02	6700.65	6458.09
C18_positive	MW0010983	(25S)-26-Hydroxy-24-methylenecycloartan-3-one	(25S)-26-Hydroxy-24-methylenecycloartan-3-one	Aldehyde,Ketones,Esters	醛、酮、酯类	Ketones	酮类	C31H50O2	437.374	454.381	8.7815	M+H-H2O	8.58008	3	0.7713	rp	232266-06-7	78385389	HMDB0034555	-	-	1275.77	741.249	1130.76	1404.85	3032.02	1736.92	1333.81	3800.41	3361.53	6466.64	1386.57	2711.56	2397.18	1391.91	2266.98	2605.9	421.499	871.023	1219.72	4620.56	1510.06	990.45	1276.19	1756.81	2714.25	2745.04	2799.61	2826.75
C18_positive	MW0111261	Pirimicarb	嘧啶威	Heterocyclic compounds	杂环化合物	Heterocyclic compounds	杂环化合物	C11H18N4O2	239.149	238.143	10.899	M+H	3.15429	2	0.7265	rp	23103-98-2	31645	-	68822	C11079	52166.2	47889	46652	57494.5	54949.9	53246.7	67605.4	78631.3	72630.6	60948.7	65156.5	52965.5	61728	68629.3	47285.1	47194.8	50960.9	48387.5	68789.3	57041.6	63847.7	64125.3	73200.8	69735.7	58553.3	57789.4	57445.8	56831
C18_positive	MW0151765	Irehine	伊莱茵	Alcohol and amines	醇、胺类	Amines	胺类	C23H39NO	346.311	345.303	6.5237	M+H	1.14167	3	0.7091	rp	2309-39-9	442978	-	-	C10810	203808	185174	192354	176483	181603	184950	540434	610138	641496	625247	624313	618049	162132	286011	151330	157534	261628	196172	359699	272002	345184	290483	343536	394580	160960	163368	161313	160936
C18_positive	MW0145987	L-Asparaginyl-L-lysine	L-天冬酰胺-L-赖氨酸	Amino acid and Its metabolites	氨基酸及其代谢物	Small Peptide	小肽	C10H20N4O4	389.112	260.149	9.6821	M+NH4	0.699015	2	0.6647	rp	22677-58-3	16122521	-	65187	-	9.002	0.962	2.045	2.09	7.429	2.548	7.046	0.671	2.391	1.807	0.269	0.713	1.706	28.097	10.365	1.116	7.165	1.608	1.015	1.132	1.885	1.996	7.543	9.371	305.624	303.582	302.786	299.092
C18_positive	MW0006573	Cinacalcet	西那卡塞	Benzene and substituted derivatives	苯及其衍生物	Benzene and substituted derivatives	苯及其衍生物	C22H22F3N	358.173	357.17	8.9349	M+H	1.086	4	0.7236	rp	226256-56-0	156419	HMDB0015147	-	-	18349.4	7713.93	10033.8	13996.2	6748.88	10875.9	14490.2	6800.72	12655.5	12433	9258.42	16065.6	10276.4	16561.9	18095.2	11460.7	20633.2	8271.27	11704.7	9453.8	14334.2	12523.3	9512.72	10412.5	6376.63	5976.61	6006.3	5810.59
C18_positive	MEDP1448	MG(18:0/0:0/0:0)	MG(18:0/0:0/0:0)	GL	甘油脂类	MG	单甘油酯	C21H42O4	359.316	358.308	8.9349	M+H	1.5253	1	0.7545	rp	22610-61-3	15560610	HMDB0011131	-	-	3.6038e+06	4.31451e+06	3.54808e+06	3.44594e+06	3.08826e+06	2.87787e+06	3.09731e+06	2.90462e+06	4.42905e+06	3.03091e+06	3.36531e+06	2.28344e+06	2.84775e+06	3.17524e+06	3.74617e+06	3.11932e+06	3.84063e+06	3.0559e+06	2.61643e+06	3.13879e+06	3.60872e+06	2.96357e+06	4.03671e+06	2.89243e+06	2.42732e+06	2.38707e+06	2.27069e+06	2.03337e+06
C18_positive	MW0006831	Diflunisal	双氟尼沙	Benzene and substituted derivatives	苯及其衍生物	Benzene and substituted derivatives	苯及其衍生物	C13H8F2O3	251.047	250.044	10.6572	M+H	11.1361	2	0.8866	rp	22494-42-4	3059	HMDB0014999	-	C01691	9605.94	9638.42	11055.2	12741.7	11381.6	10737.7	14115	18730.5	18208.9	15670.9	13973.3	13163.1	10434.2	11593.7	8560.4	8463.95	9865.68	8018.36	12264.4	10677.8	14069.4	14326.2	15423.3	14491.8	10657.5	10623.8	10927.6	10674.2
C18_positive	MW0011495	(all-E)-6'-Apo-y-caroten-6'-al	(全-E)-6'-Apo-y-caroten-6'-al	Aldehyde,Ketones,Esters	醛、酮、酯类	Aldehydes	醛类	C32H42O	443.334	442.324	10.899	M+H	7.74583	3	0.8271	rp	22255-36-3	20055192	HMDB0040118	-	-	47872.1	47516.4	44540.6	57362.5	52846.9	51915.2	77437.2	86566.6	83540.6	76285	67634.9	58925.5	55583.4	69079.1	47983.2	50305.1	52875.4	44648.8	60610.8	58569.1	72186.8	68793.1	76109.1	77157.8	58078	57665.5	57148.2	56336.7
C18_positive	MW0006499	Carboxytolbutamide	羧甲苯磺丁脲	Benzene and substituted derivatives	苯及其衍生物	Benzene and substituted derivatives	苯及其衍生物	C12H16N2O5S	323.065	300.078	6.7536	M+Na	0.019	4	0.7495	rp	2224-10-4	159651	HMDB0041849	-	-	396.661	13.817	355.542	363.312	184.104	194.063	130.453	267.914	119.883	106.865	439.551	193.638	313.232	399.082	47.424	200.949	321.777	286.323	442.553	310.403	176.091	237.403	262.054	260.097	542.72	521.423	547.683	557.098
C18_positive	MW0119165	2,5-Dibromopyridine-3,4-diamine	2,5-二溴吡啶-3,4-二胺	Heterocyclic compounds	杂环化合物	Heterocyclic compounds	杂环化合物	C5H5Br2N3	267.885	266.883	0.8947	M+H	7.447	4	0.5946	rp	221241-11-8	53416175	-	-	-	1420.46	1627.79	1274.71	1975.27	1617.48	1840.96	1515.06	889.708	943.423	1092.76	760.907	1285.99	1342.76	1117.22	1163.96	1228.33	739.529	1154.05	1177.25	676.502	1203.84	1200.6	703.281	575.579	1096.73	1144.89	1173.64	1138.17
C18_positive	MW0125198	Molinate	-	Others	其他	Others	其他	C9H17NOS	188.104	187.103	5.7451	M+H	15.7078	2	0.8488	rp	2212-67-1	16653	-	68828	-	12737.1	11903.9	10663.9	15497.3	12126.5	11231	13271.9	13823.9	15419	13757.4	13131.7	13262.9	14633	16864.5	12497.6	12406.3	12157.1	11614.7	14872.2	11951.8	14997.9	16068.1	12975.7	15889.2	13301.9	12968.5	14343.4	13688.7
C18_positive	MW0104240	1-Aminocyclopropanecarboxylic acid	1-氨基环丙烷-1-羧酸	Organic acid and Its derivatives	有机酸及其衍生物	Organic acid and Its derivatives	有机酸及其衍生物	C4H7NO2	84.0442	101.048	0.7474	M+H-H2O	0.956129	1	0.8049	rp	22059-21-8	535	HMDB0036458	-	C01234	4465.31	4351.87	4649.84	5091.67	3738.57	3567.47	16076.3	14682.6	8101.4	14469.6	12540	15481.6	6529.52	6694.18	5045.22	5042.23	2362.32	1152.41	15660.9	4903.06	20721.4	19131.1	20697.7	20931.2	12548	12657.9	12597.6	12557.2
C18_positive	MW0159644	Aluminum hydroxide	氢氧化铝	Others	其他	Others	其他	Al(OH)3	294.906	77.9898	12.2674	3M+Na+K-H	2.644	4	0.9381	rp	21645-51-2	-	-	-	C13391	12750.9	11040.1	13037	15191.3	13598	13930.9	15509.4	12645.5	21226.5	14881.5	16129.1	13827.8	15033.9	15149.4	10668.2	11651.7	13776.5	11924.4	13104.6	14423.1	17007	17079.9	16530.6	16314.6	14587.4	14495.2	13968.3	14536.5
C18_positive	MW0015733	alpha-Terpineol formate	α-松油醇甲酸酯	Aldehyde,Ketones,Esters	醛、酮、酯类	Esters	酯类	C11H18O2	165.127	182.131	8.7298	M+H-H2O	3.30025	4	0.6739	rp	2153-26-6	16537	HMDB0032050	-	-	0.317	2.56	2.912	0.814	0.454	3.027	3.036	4.097	1.447	2.686	3.044	0.193	0.529	10.86	1.929	0.473	3.183	2.427	0.479	2.817	1.74	3.122	0.641	4.72	76.062	73.907	73.321	69.4
C18_positive	MW0169673	Picrotin	苦味素	Heterocyclic compounds	杂环化合物	Heterocyclic compounds	杂环化合物	C15H18O7	355.07	310.105	9.6847	M-H+2Na	13.8309	2	0.5043	rp	21416-53-5	442291	HMDB0240279	43703	C09528	36.629	30.794	55.733	79.967	35.618	73.628	104.671	72.824	93.207	22.762	34.825	41.083	124.149	431.512	32.947	39.461	30.646	22.608	38.579	44.841	36.588	35.368	153.213	141.096	3011.64	3001.83	3069.37	2935.25
C18_positive	MW0103357	2'-O-Methyladenosine	2'-O-甲基腺苷	Nucleotide and Its metabolites	核苷酸及其代谢物	Nucleotide and Its metabolites	核苷酸及其代谢物	C11H15N5O4	348.071	281.112	0.8383	M-2H+3Na	13.8912	1	0.8708	rp	2140-79-6	102213	HMDB0004326	58235	-	310273	300766	314022	291728	272300	310244	181208	174959	183572	184956	178591	168713	257661	302523	213439	224966	209129	167643	129607	144589	199429	152544	161960	137460	257855	260277	256510	256791
C18_positive	MW0146567	Benzamide, N-(4-(1-methyl-2-(((1-methylethyl)sulfonyl)amino)ethyl)phenyl)-	苯甲酰胺，N-(4-(1-甲基-2-(((1-甲基乙基)磺酰基)氨基)乙基)苯基)-	Benzene and substituted derivatives	苯及其衍生物	Benzene and substituted derivatives	苯及其衍生物	C19H24N2O3S	343.155	360.151	9.3792	M+H-H2O	15.8328	3	0.6157	rp	211313-51-8	656707	-	-	-	9111.65	7628.5	8829.47	8713.47	8642.27	8801.51	10299.2	15638.9	12716.1	10566.2	11577.5	8744.16	8794.85	9790.9	8396.27	6588.66	9324.52	7299.75	9559.76	8975.13	10025.1	11128.3	11414.5	11357.9	9030.67	8704.78	8666.55	8245.39
C18_positive	MW0049017	3-[3-[5-[3,4-dihydroxy-6-(hydroxymethyl)-5-[3,4,5-trihydroxy-6-(hydroxymethyl)oxan-2-yl]oxyoxan-2-yl]oxy-4-hydroxy-6-methyloxan-2-yl]oxy-5,14-dihydroxy-10-(hydroxymethyl)-13-methyl-2,3,4,6,7,8,9,11,12,15,16,17-dodecahydro-1H-cyclopenta[a]phenanthren-17-yl]-2H-furan-5-one	-	Heterocyclic compounds	杂环化合物	Heterocyclic compounds	杂环化合物	C41H64O19	431.207	860.404	7.7532	M+2H	10.2507	4	0.5495	rp	210637-19-7	3801879	HMDB0032828	-	-	4957.25	8221.71	8711.26	5328.91	6397.57	3234.15	2981.66	4492.94	3444.94	3796.37	5738.9	3120.17	3832.44	4975.52	3440.05	3978.34	2802.48	3574.17	3911.76	3957.03	5451.55	4246.56	6206	4364.75	4515.1	4613.64	4422.53	4511.8
C18_positive	MW0002920	2-Chloro-N-(2,6-diisopropylphenyl)acetamide	2-氯-N-(2,6-二异丙基苯基)乙酰胺	Benzene and substituted derivatives	苯及其衍生物	Benzene and substituted derivatives	苯及其衍生物	C14H20ClNO	276.12	253.123	0.7474	M+Na	9.14475	4	0.5665	rp	20781-86-6	2363774	-	-	-	42.467	86.278	136.349	80.049	24.239	49.849	100.811	124.451	82.269	19.504	44.832	78.964	94.836	99.984	35.803	45.313	9.043	91.284	246.359	77.256	45.072	115.717	159.756	86.67	597.482	640.765	389.972	575.905
C18_positive	MW0009561	Propofol	异丙酚	Benzene and substituted derivatives	苯及其衍生物	Benzene and substituted derivatives	苯及其衍生物	C12H18O	151.112	178.136	6.4658	M+H-C2H4	3.08675	4	0.6785	rp	2078-54-8	4943	HMDB0014956	-	C07523	7.036	11.046	2.382	11.012	4.592	5.415	4.856	8.703	10.547	0.774	2.906	1.574	3.63	67.016	5.435	7.542	11.756	3.85	6.899	12.182	4.571	6.161	6.842	18.511	298.033	298.327	298.467	295.774
C18_positive	MW0141009	1-(1Z-Octadecenyl)-2-(4Z,7Z,10Z,13Z,16Z,19Z-docosahexaenoyl)-sn-glycero-3-phosphoethanolamine	1-（1Z十八烷基）-2-（4Z，7Z，10Z，13Z，16Z，19Z二十二碳六烯基）-sn-甘油-3-磷酸乙醇胺	Others	其他	Others	其他	C45H78NO7P	776.573	775.552	10.0632	M+H	18.9992	2	0.6715	rp	206059-98-5	42607458	HMDB0011394	-	-	94737.7	99043.2	91436.9	115745	111848	103695	98004.1	134657	119732	111232	109066	98619.3	107354	111987	91389.3	87774	96549.6	89794.6	112091	98117.3	110030	111339	111918	122612	102155	102136	102154	102135
C18_positive	MW0123699	dimethenamide ESA	二甲胺	Organic acid and Its derivatives	有机酸及其衍生物	Organic acid and Its derivatives	有机酸及其衍生物	C12H19NO5S2	322.077	321.07	0.9131	M+H	1.3395	4	0.9676	rp	205939-58-8	6426850	-	-	-	11780.8	9014.44	9804.78	10687.8	9400.63	9268.47	4581.45	3031.35	4769.43	3047.11	5704.19	5052.21	5916.05	7691.14	12046.6	9522.43	11522.2	14686.3	10748.3	7745.02	9148.9	7245.95	6447.75	8618.66	14164.2	13543.7	14543.4	14307.2
C18_positive	MEDP1180	LPC(14:0/0:0)	溶血磷脂酰胆碱 14:0	GP	甘油磷脂类	LPC	溶血磷脂酰胆碱	C22H46NO7P	468.309	467.301	7.6764	M+H	1.0763	1	0.9538	rp	20559-16-4	460604	HMDB0010379	-	-	9490.41	7663.31	6929.46	7723.28	8680.2	8615.45	7854.8	9552.01	12321.7	9502.31	5442.88	8839.52	7141.77	9970.59	9731.85	4115.11	13088.9	20353.8	7007.7	10839.8	3908.18	4046.5	4598.48	3699.96	10619.3	10647.4	10676.3	10493.4
C18_positive	MW0110349	Val-Ile	缬氨酸-异亮氨酸	Amino acid and Its metabolites	氨基酸及其代谢物	Small Peptide	小肽	C11H22N2O3	231.171	230.163	2.4463	M+H	0.65	3	0.7929	rp	20556-14-3	7010532	HMDB0029130	65242	-	154.107	1.404	150.596	3.715	1.176	114.544	1.981	3.569	12.403	24.215	16.417	14.948	66.023	1.226	5.969	0.546	5.229	10.623	179.304	23.345	4.937	4.908	11.644	0.703	578.299	580.859	586.035	566.599
C18_positive	MW0120026	4,5-Diaminofluorescein diacetate	4,5-二氨基荧光素二乙酸酯	Heterocyclic compounds	杂环化合物	Heterocyclic compounds	杂环化合物	C24H18N2O7	447.118	446.111	10.7482	M+H	0.829794	2	0.7318	rp	205391-02-2	6603693	-	64884	-	40.344	35.57	53.366	58.486	49.686	34.105	93.96	66.763	62.987	48.783	40.612	19.031	19.055	191.153	312.278	26.2	23.839	40.226	31.886	33.956	538.228	37.096	128.987	111.964	1683.41	1669.52	1647.89	1663.17
C18_positive	MEDN0181	(2-Aminoethyl)phosphonic acid	2-氨基乙基膦酸	Aldehyde,Ketones,Esters	醛、酮、酯类	Esters	酯类	C2H8NO3P	189.043	125.024	1.4096	M+CH3CN+Na	8.90453	2	0.8053	rp	2041-14-7	339	HMDB0011747	-	C03557	4935.86	5245.04	5570.94	6761.85	4134.72	5232.61	5164.38	5598.22	5387.52	4844.48	5144.25	5437.55	6797.56	8198.21	3809.59	4023.33	5209.38	4168.86	5615.5	4039.56	5168.69	4964.04	7743.19	5862.7	8830.01	8792.35	8888.04	8709.96
C18_positive	MW0002900	2-Chloro-6-fluorophenol	2-氯-6-氟苯酚	Benzene and substituted derivatives	苯及其衍生物	Phenolics	苯酚类	C6H4ClFO	168.982	145.994	12.7772	M+Na	1.17675	4	0.7214	rp	2040-90-6 | 20651-57-4	2773710	-	-	-	7055.77	8232.71	8963.21	15657	9334.79	6936.02	9116.76	10103.4	15203.7	10559.6	5518.35	6403.77	9524.67	9803.16	6626.6	12093.8	9443.23	5889.74	8648.06	7095.26	5609.55	23728.5	20784	11908.1	8102.25	7726.51	6996.49	7887.92
C18_positive	MW0139653	Saponarin	皂苷	Flavonoids	黄酮	Flavonoid	黄酮	C27H30O15	658.166	594.159	4.133	M+CH3CN+Na	10.0393	2	0.5095	rp	20310-89-8	441381	-	-	C08064	15615.4	13926.9	14182.1	17772.2	14721	16944.9	15684.7	16989.9	18340	18543.6	17764.3	15604.7	15405	18668	13885	14762	14690.1	12939.5	17172.5	14855.7	16208.8	16787.6	16079.7	17403.4	15380.2	16020	15215.1	15075.3
C18_positive	MW0007324	Homodihydrocapsaicin	高二氢辣椒碱 I	Benzene and substituted derivatives	苯及其衍生物	Phenolics	苯酚类	C19H31NO3	344.228	321.23	3.0314	M+Na	9.015	4	0.5686	rp	20279-06-5	3084336	HMDB0036330	-	-	2199.41	2653.94	2463.7	2582.17	2073.26	2811.34	2433.13	3641.34	1705.49	2775.17	2581.08	2478.22	1797.01	2298.29	6075.8	2126.31	2363.96	2354.66	2800.6	1970.78	4818.65	2295.39	2764.73	3041.57	2932.25	2837.91	2911.43	2920.65
C18_positive	MW0014037	3-hexanoyl-NBD Cholesterol	3-己酰基-NBD胆固醇	Hormones and hormone related compounds	激素及激素相关物质	Hormones and hormone related compounds	激素及激素相关物质	C39H58N4O5	663.454	662.441	11.172	M+H	6.88665	2	0.6948	rp	201731-19-3	57370056	-	64806	-	9936.71	7598.28	8839.45	12323.3	9514.75	20644.5	19809.8	12603.9	20727.5	23570.1	15873.6	21986.8	7892.72	13231.1	8066.04	7991.97	12769.9	13686.1	16891.4	22499.8	22276.8	13901.7	16857.9	21100.7	12036.9	10799	12246.3	13254.3
C18_positive	MW0002566	2-[Bis(5-methylfuran-2-yl)methyl]-6-bromo-4-nitrophenol	2-[双(5-甲基呋喃-2-基)甲基]-6-溴-4-硝基苯酚	Benzene and substituted derivatives	苯及其衍生物	Phenolics	苯酚类	C17H14BrNO5	415.986	393.004	0.5499	M+Na	3.233	4	0.6754	rp	201003-01-2	2751416	-	-	-	347.914	510.802	523.503	554.943	1097.81	314.958	909.139	797.271	1558.39	869.607	1313.33	710.852	520.265	768.838	651.145	1191.55	834.278	1306.84	1791.12	1467.1	204.274	1576.97	1740.61	1590.04	1135.24	1160.91	1150.97	1129.83
C18_positive	MW0127419	Butylate	丁酯	Aldehyde,Ketones,Esters	醛、酮、酯类	Esters	酯类	C11H23NOS	281.166	217.15	9.7149	M+CH3CN+Na	3.26399	2	0.7084	rp	2008-41-5	16181	-	-	-	35815.9	32124.6	33346.9	39749.4	38634.2	35210.1	34894.2	44965.7	49166.7	44782.7	42223.7	34932.1	38284.6	43396.1	34633	31642.7	38991.5	31717.7	46636.1	36602.3	42319.2	44818.1	43790.6	43660.6	29321.7	29629.2	29178.5	29490
C18_positive	ZINC6523021	12-Demethylmulticaulin	12-去甲基多考林	Benzene and substituted derivatives	苯及其衍生物	Phenolics	苯酚类	C19H20O	303.112	264.151	3.0846	M+K	3.96175	4	0.6601	rp	199986-64-6	467783	-	-	-	2581.05	2618.25	3048.28	2997.49	2209.32	3494.94	2849.77	3766.43	3020.27	2116.28	1756.48	2352.67	2696.19	3510.39	2114.85	4440.95	4972.31	3249.68	2212.89	2415.28	2732.55	2924.8	2297.29	2781.71	2725.54	2739.55	2842.29	2627.25
C18_positive	MW0008852	N-Arachidonoyl dopamine	花生四烯酸多巴胺	Benzene and substituted derivatives	苯及其衍生物	Phenolics	苯酚类	C28H41NO3	440.311	439.309	8.981	M+H	6.01927	4	0.6201	rp	199875-69-9	5282105	-	43429	-	2172.68	1505.72	2080.07	2713.9	2421.81	2252.88	2639.34	3141.26	2810.78	2367.36	1565.39	2110.32	1989	2230.43	2103.46	3235.18	4940.88	3979.94	110.362	1282.75	287.386	300.278	71.529	335.225	2639.21	2455.03	2766.98	2674.27
C18_positive	MW0001165	1-(4-Fluorobenzyl)piperazine dihydrochloride	1-(4-氟苄基)哌嗪二盐酸盐	Others	其他	Others	其他	C11H17Cl2FN2	195.123	266.075	10.3246	M+H	15.6144	2	0.6664	rp	199672-06-5	12679862	-	96603	-	18306.8	17894.1	20151.5	24751.4	20658	21827.9	22490.8	30278.3	27124.8	23958.6	24338	21550.8	22072.7	26049.6	17357.5	17112.9	22443.4	19080.8	23439.3	20816.5	22939.3	23929.4	25153.9	28366.2	21012.1	20942.6	20680.1	21141.9
C18_positive	MW0161644	6-Deoxocathasterone	6-Deoxocathasterone	Alcohol and amines	醇、胺类	Alcohols	醇类	C28H50O2	307.227	418.381	7.4768	2M+2Na+K	2.19656	4	0.698	rp	198416-73-8	16061344	-	-	-	0.156	0.019	0.234	0.282	0.086	0.282	0.57	0.382	0.34	0.295	0.234	0.411	0.119	5.142	0.024	0.202	0.267	0.05	0.063	0.226	0.144	0.236	0.511	0.304	56.736	55.748	56.464	56.083
C18_positive	MW0119278	3-[(2-Chloropyridin-3-yl)amino]cyclohex-2-en-1-one	3-[(2-Chloropyridin-3-yl)amino]cyclohex-2-en-1-one	Aldehyde,Ketones,Esters	醛、酮、酯类	Ketones	酮类	C11H11ClN2O	207.032	222.056	11.7552	M+H-CH4	0.02325	4	0.9994	rp	198141-10-5	11031471	-	-	-	9.337	21.789	10.089	11.769	11.436	22.257	19.783	36.176	13.915	8.561	22.634	14.769	13.439	38.847	9.067	6.158	17.25	25.562	13.151	18.911	13.614	6.627	29.367	17.783	487.745	472.485	474.02	484.232
C18_positive	MW0121981	2-Amino-6-bromopyridine	2-氨基-6-溴吡啶	Heterocyclic compounds	杂环化合物	Heterocyclic compounds	杂环化合物	C5H5BrN2	126.967	171.964	13.1076	M+H-HCOOH	8.47675	4	0.5773	rp	19798-81-3	300809	-	-	-	746.096	1279.15	2311.45	1568.91	1466.46	915.405	1698.22	1524.53	1821.61	1670.41	1196.11	1411.1	1426.09	1586.78	1346.49	827.229	4213.02	1799.92	2896.62	4245.02	5228.79	1828.94	1802.58	4578.45	1406.14	1413.3	1358.85	1485.51
C18_positive	MW0000057	10-Hydroxycamptothecin	（S)-10-羟基喜树碱	Alkaloids	生物碱	Alkaloids	生物碱	C20H16N2O5	365.114	364.106	4.133	M+H	1.08372	2	0.8662	rp	19685-09-7	97226	-	44415	C17939	61712.4	52548.1	57451.9	64865.2	60825.2	60423.4	59910.1	62229.3	68759.8	67330.1	68141.2	57871	64776.3	72765	54041.7	59058	62990.4	53771.2	68253.9	60472.5	64543.4	67948.8	64136.3	69626.4	56632.7	57231.2	56858.9	55661.7
C18_positive	MW0014128	3-Hydroxytetradecanoic acid	3-羟基十四烷酸	Organic acid and Its derivatives	有机酸及其衍生物	Organic acid and Its derivatives	有机酸及其衍生物	C14H28O3	227.201	244.204	7.8928	M+H-H2O	0.870692	2	0.5856	rp	1961-72-4 | 3422-31-9	16064	HMDB0061656	35541	-	0.205	0.056	0.054	0.323	0.049	0.238	1.136	0.397	0.534	0.247	0.606	0.06	0.348	2.895	0.157	0.115	0.22	0.266	0.404	0.165	0.479	0.107	0.38	0.77	45.78	46.421	46.915	47.054
C18_positive	MW0105495	L-Alanyl-L-alanine	Ala Ala	Amino acid and Its metabolites	氨基酸及其代谢物	Small Peptide	小肽	C6H12N2O3	205.065	160.085	1.7576	M-H+2Na	19.6982	1	0.6355	rp	1948-31-8	5484352	HMDB0028680	-	-	79.989	41.997	201.683	100.46	264.727	1.742	31132.8	30648.8	29394.9	29776.1	23969.7	29214.2	112.938	18.662	222.166	99.02	217.854	314.451	28878.3	27701.7	24062.2	23834.1	21152.7	23431.3	7910.16	8082.84	8189.13	7579.52
C18_positive	MW0011583	(R)-2,3-Dihydroxy-isovalerate	（R)-2,3-二羟基-3-甲基丁酸酯	Organic acid and Its derivatives	有机酸及其衍生物	Organic acid and Its derivatives	有机酸及其衍生物	C5H10O4	203.059	134.058	2.0039	M+Na+HCOOH	16.25	3	0.6543	rp	19451-56-0	440279	HMDB0012141	-	C04272	650.227	777.751	995.458	876.406	587.772	596.212	778.351	904.781	684.761	622.439	607.656	814.857	927.692	1758.34	421.862	483.327	576.328	631.144	655.762	611.42	606.336	717.264	1212.64	892.635	3387.79	3430.23	3466.82	3473.74
C18_positive	MW0012998	LPC(18:0/0:0)	LPC(18:0/0:0)	GP	甘油磷脂类	LPC	溶血磷脂酰胆碱	C26H54NO7P	525.375	523.364	9.8812	M+H	8.27294	1	0.7649	rp	19420-57-6	497299	HMDB0010384	-	C04230	6826.69	6676.3	7269.28	8072.84	7612.6	7301.32	48476.5	57042.6	51993	52152.8	44331.6	46176.9	6102.35	7010.18	5993.98	6280.5	7720.77	8278.92	28593.5	34498.6	25520.5	23072.8	26587.4	25981	18564.9	18278.9	18221	17941.1
C18_positive	MW0145220	Arachidonic Acid methyl ester-d8	花生四烯酸甲酯-d8	FA	脂肪酰类	Others	其他	C21H34O2	327.309	318.256	6.0882	M+H	9.11869	2	0.8763	rp	19245-55-7	71684714	-	96525	-	15618	15373.8	15638.1	16219.3	14448.3	13639.2	105736	107174	109534	110913	102823	107699	5451.79	10272.1	12358.2	11385.4	14024.1	8176.36	8182.48	11639.2	1355.2	4793.73	1854.9	1808.82	15793	15789.4	15706	15636.7
C18_positive	MW0113965	Benzoyl glucuronide	-	Organic acid and Its derivatives	有机酸及其衍生物	Organic acid and Its derivatives	有机酸及其衍生物	C13H14O8	299.08	298.069	8.4442	M+H	0.33125	4	0.9918	rp	19237-53-7	115145	HMDB0010324	-	-	180.141	171.44	272.996	319.688	136.539	198.997	304.136	254.619	187.507	180.443	182.829	236.011	290.471	915.945	188.623	158.563	185.271	165.343	203.271	167.388	203.643	191.057	479.352	363.992	4263.74	4271.71	4305.73	4199.78
C18_positive	MW0011897	PC(8:0/8:0)	PC(8:0/8:0)	GP	甘油磷脂类	PC	磷脂酰胆碱	C24H48NO8P	548.272	509.312	12.2214	M+K	2.66248	2	0.7079	rp	19191-91-4	24779244	-	45203	-	5612.34	6016.37	3390.78	9602.38	8672.55	8960.53	2179.15	5342.74	5713.95	3968.77	2709.17	4057.52	5450.54	4899.72	3886.91	1607.3	4740.63	373.774	2887.06	7006.37	3698.26	3444.02	1253.21	3563.2	4586.58	4443.46	4685.49	4895.8
C18_positive	MW0111418	(2S,3S)-butane-2,3-diol	(2S,3S)-丁烷-2,3-二醇	Alcohol and amines	醇、胺类	Alcohols	醇类	C4H10O2	73.0646	90.0681	6.7077	M+H-H2O	0.491277	2	0.8372	rp	19132-06-0	439888	-	63265	C03046	2486.68	2466.24	2874.6	3005.05	2678.67	2618	2552.83	2733.59	2847.66	2836.07	2486.85	2436.52	2989.06	3341.07	2462.49	2437.76	2798.45	2796.09	2947.78	2692.36	2961.73	2862.7	2810.58	3143.05	3933.26	4041.58	3937.49	3887.08
C18_positive	MW0168794	Atrazine	阿特拉津	Heterocyclic compounds	杂环化合物	Heterocyclic compounds	杂环化合物	C8H14ClN5	453.172	215.094	1.2432	2M+Na	7.64182	2	0.7101	rp	1912-24-9	2256	HMDB0041830	-	C06551	359.845	334.847	278.654	110.457	278.441	46.988	368.39	321.79	268.238	246.578	337.113	250.665	154.492	183.76	391.109	275.33	404.354	431.327	541.847	153.592	608.697	377.15	267.235	480.062	1667.53	1665.95	1745.21	1671.91
C18_positive	MW0062208	Prosapogenin A	皂苷元A	Steroids	甾体	Steroidal saponins	甾体皂苷	C39H62O12	745.42	722.424	2.9174	M+Na	9.0007	2	0.7548	rp	19057-67-1	11061578	HMDB0029312	-	-	571.402	435.767	471.748	442.339	370.656	290.106	105.445	49.615	75.503	201.487	129.371	20.624	301.753	358.361	644.795	449.251	723.097	1202.68	199.33	27.206	235.928	126.842	71.212	69.35	1907.05	1904	1915.35	1933.26
C18_positive	MEDP1067	Palmitoylisopropylamide	棕榈酰基N-异丙基酰胺	Alcohol and amines	醇、胺类	Amines	胺类	C19H39NO	298.311	297.303	6.5544	M+H	1.82834	1	0.9142	rp	189939-61-5	5063962	-	64930	-	27735.4	27386.6	30148.6	28170.1	28937	22320.1	129741	139812	162213	161452	142430	136173	2.74	22531.8	18972	29893	24968.7	17.486	129381	177197	173967	138891	133059	202369	20377.8	20908	19769.7	20018.5
C18_positive	MW0121830	6,7-dihydro-5H-cyclopenta[d]pyrimidine-2,4-diamine	6,7-二氢-5H-环戊二烯[d]嘧啶-2,4-二胺	Heterocyclic compounds	杂环化合物	Heterocyclic compounds	杂环化合物	C7H10N4	133.086	150.09	10.899	M+H-H2O	1.366	4	0.717	rp	1899-39-4	230743	-	-	-	5606.47	4762.04	4860.16	5911	5823.43	5576.19	7051.55	8909.97	7865.35	6492.34	6717.07	5810.91	6221.6	6406.73	4652.63	5184.36	5160	4577.47	6307.19	5381.55	7748.85	7121.72	7425.2	7789.94	5999.8	5940.61	5896.71	5812.55
C18_positive	MW0140161	4-Hydroxy-4-(3-hydroxy-1-butenyl)-3,5,5-trimethyl-2-cyclohexen-1-one	4-Hydroxy-4-(3-hydroxy-1-butenyl)-3,5,5-trimethyl-2-cyclohexen-1-one	Alcohol and amines	醇、胺类	Alcohols	醇类	C13H20O3	225.149	224.141	6.0907	M+H	0.998359	2	0.5199	rp	189351-15-3 | 24427-77-8	5280654	-	-	C04166	0.303	0.191	0.342	0.543	0.195	0.275	0.83	0.049	0.148	0.995	0.214	0.099	0.129	9.865	0.27	0.403	0.235	0.07	0.219	0.383	0.302	1.406	0.69	1.069	76.344	74.996	86.067	74.972
C18_positive	MW0000828	(S)-2-Benzhydrylpyrrolidine hydrochloride	-	Others	其他	Others	其他	C17H20ClN	238.157	273.128	4.5004	M+H	6.52946	2	0.7004	rp	188398-87-0	71300054	-	96727	-	22200.2	20629.3	21256.4	24677.1	22967.7	22894	25900.7	24627.2	28629	24433.2	24939.6	24864.6	26002.3	28875.3	21483.4	22151.4	23550.7	19048.6	26424.5	23970.2	27245.1	27762.7	29462	28917	21560.2	19749.2	21291.1	20822.5
C18_positive	MW0161382	6-Deoxoteasterone	6-脱氧睾酮	Aldehyde,Ketones,Esters	醛、酮、酯类	Esters	酯类	C28H50O3	435.368	434.376	11.4753	M+H	34.5234	4	0.589	rp	188397-19-5	11144580	-	-	-	14033.5	7672.71	14132.7	15589.3	14961.3	15262.9	15755.6	13257.9	20192.6	10003.8	9747.19	8489.08	7901.74	9946.65	7067.32	7571.6	8341	6881.99	15618.9	8607.76	17006.2	10576.1	17717.5	19368.2	12621.8	11877.9	11627	12131.8
C18_positive	MW0106577	Echinulin	棘豆素	Heterocyclic compounds	杂环化合物	Heterocyclic compounds	杂环化合物	C29H39N3O2	462.312	461.304	9.4713	M+H	0.493384	4	0.9878	rp	1859-87-6	115252	-	-	-	10110.1	8641.59	10210.2	8186.66	8555.83	8972.65	51246.6	56832.7	56874.8	56900.6	51605.1	52791.5	50.801	394.607	998.174	12.769	776.006	6.588	8.051	26974	11.335	12.644	3.159	8.466	12094.8	12329.6	12116.4	12179.6
C18_positive	MW0055124	3-(11,12-Dihydroxy-15,19-dotriacontadienyl)-5-methyl-2(5H)-furanone, 9CI	3-(11,12-Dihydroxy-15,19-dottricontadienyl)-5-methyl-2(5H)-furanone, 9CI	FA	脂肪酰类	Others	其他	C37H66O4	575.503	574.496	10.6572	M+H	5.2797	3	0.6586	rp	185336-15-6	131750907	HMDB0029795	-	-	4016.53	5342.06	8384.25	9493.23	10028.7	11349.4	9949.6	10521.5	8712.67	6912.31	4489.05	6198.9	5233.39	6050.74	4440.16	2724.52	2024.36	4450.9	10236.8	12956	15140.5	16644.2	9070.43	14119.1	7850.01	7507.95	5578.1	8569.27
C18_positive	MEDN0685	Undecanedioic acid	十一烷二酸	FA	脂肪酰类	FFA	游离脂肪酸	C11H20O4	181.122	216.136	5.1066	M+H-2H2O	1.66607	2	0.6187	rp	1852-04-6	15816	HMDB0000888	5846	-	1.616	3.628	1.398	4.842	1.519	2.758	8.269	2.656	3.374	2.115	1.915	1.239	2.38	31.918	2.057	1.216	1.346	2.829	0.261	2.538	2.412	2.652	1.315	4.182	189.009	189.025	193.864	185.255
C18_positive	MW0008401	(5Z,8Z,11Z,14Z)-N-(4-hydroxyphenyl)icosa-5,8,11,14-tetraenamide	(5Z,8Z,11Z,14Z)-N-(4-羟基苯基)icosa-5,8,11,14-四烯酰胺	Benzene and substituted derivatives	苯及其衍生物	Benzene and substituted derivatives	苯及其衍生物	C26H37NO2	396.281	395.282	8.9454	M+H	22.8607	2	0.832	rp	183718-77-6 | 198022-70-7	6604822	-	64919	-	116831	130490	116993	101760	107158	103986	97146.3	120295	179944	95219.7	132928	112349	59415.3	78177.7	107017	102759	115873	91750	100242	76587.7	142305	81743.9	155493	126125	54723.1	55977.9	40687	35380.2
C18_positive	MW0126199	p-Mentha-1,3,8-triene	对薄荷三烯	Others	其他	Hydrocarbon derivatives	烃衍生物	C10H14	181.122	134.11	4.5612	M+HCOO+2H	0.728828	2	0.7149	rp	18368-95-1	176983	HMDB0037013	-	-	0.535	0.684	0.693	0.584	0.461	0.548	0.706	0.493	1.115	0.217	0.248	0.306	0.401	4.248	0.317	0.487	0.211	0.489	0.137	0.189	0.475	0.858	0.949	0.86	89.108	89.643	90.392	88.781
C18_positive	MEDP1096	PC(12:0/12:0)	PC(12:0/12:0)	GP	甘油磷脂类	PC	磷脂酰胆碱	C32H64NO8P	548.371	621.437	9.3334	M+H-H2O	0.228149	1	0.7433	rp	18194-25-7 | 127641-86-5	512874	-	-	-	18.346	32.591	36.05	5.008	44.147	9.78	10525.3	11629.6	11051.6	9871.98	9378.07	9829.65	1175.38	51.646	353.108	395.364	41.891	67.453	389.518	526.595	191.491	58.905	170.664	450.641	3046.83	3268.18	2905.12	3095.11
C18_positive	MW0160233	[[(2R,3S,4R,5R)-5-(2-amino-6-oxo-3H-purin-9-yl)-3,4-dihydroxyoxolan-2-yl]methoxy-hydroxyphosphoryl] [(2R,3S,4R,6R)-3,4-dihydroxy-6-methyl-5-oxooxan-2-yl] hydrogen phosphate	-	Others	其他	Others	其他	C16H23N5O15P2	610.056	587.067	0.6567	M+Na	2.40296	4	0.9434	rp	18186-48-6	439446	HMDB0001346	6180	C01222	3198.86	2707.46	2530.95	2491.73	2359.62	2666.09	7368.13	5253.52	4567.26	6384.8	5441.56	6421.17	2452.33	1901.09	1755.49	2313.96	1492.99	1178.46	3134.72	1548.06	3243.07	3674.99	3396.73	3295.52	8391.54	8268.37	8562.63	8467.04
C18_positive	MW0122087	6-Chloro-5-methyl-N-(6-((2-methylpyridin-3-yl)oxy)pyridin-3-yl)indoline-1-carboxamide dihydrochloride	6-Chloro-5-methyl-N-(6-((2-methylpyridin-3-yl)oxy)pyridin-3-yl)indoline-1-carboxamide dihydrochloride	Others	其他	Others	其他	C21H21Cl3N4O2	395.124	466.073	4.133	M+H	7.69006	2	0.8122	rp	181632-25-7	16219981	-	45379	C71210	21389.6	18509.8	19207	22616.4	20895.2	21543.9	20690.2	21280.3	22458.7	22398.4	23553.8	20519.3	21500.4	23667.3	17536.2	20513.3	21187.1	16782.3	24081.6	19836.6	21659	23194.1	21317.6	23333.1	19966.4	20512.4	19877.1	19351
C18_positive	MW0151748	Inegerrenine	伊格瑞宁	Benzene and substituted derivatives	苯及其衍生物	Benzene and substituted derivatives	苯及其衍生物	C31H42N4O4	125.096	534.321	2.7509	M+3H-C6H10O5	8.22346	4	0.5814	rp	18067-39-5	5476103	-	-	-	82.074	101.482	77.88	72.607	66.244	55.035	73.871	49.26	93.864	53.43	68.516	85.668	77.87	131.84	28.247	38.343	7.785	10.866	90.833	42.619	47.376	59.651	116.058	88.372	663.447	670.932	659.98	669.092
C18_positive	MW0063380	Palmitic monoisopropanolamide, (R)-	R-棕榈酰基-(2-甲基）乙醇酰胺	FA	脂肪酰类	Others	其他	C19H39NO2	314.3	313.298	5.9132	M+H	0.774543	2	0.9206	rp	179951-56-5	18395309	-	62966	-	177.036	162.135	84.649	59.262	158.821	63.238	1786.53	2454.14	1987.73	957.934	1162.64	1045.28	97.857	59.708	106.861	89.122	61.391	114.876	125.08	116.93	43.555	136.658	57.107	37.81	613.155	627.312	590.604	618.575
C18_positive	MW0169501	Myricitrin	杨梅苷	Flavonoids	黄酮	Flavonoid	黄酮	C21H20O12	429.089	464.096	10.7482	M+H-2H2O	15.4697	2	0.7521	rp	17912-87-7	5281673	HMDB0034360	50852	C10108	29.948	30.264	42.176	38.854	35.849	31.158	48.379	34.211	26.137	23.377	24.073	16.291	25.906	133.701	171.288	14.946	27.353	15.156	21.491	25.106	215.122	33.533	92.448	75.546	969.736	942.287	959.152	958.7
C18_positive	MW0139195	O-Methylsterigmatocystin	O-甲基柄曲菌素	Heterocyclic compounds	杂环化合物	Heterocyclic compounds	杂环化合物	C19H14O6	339.086	338.079	5.1369	M+H	0.461747	2	0.6898	rp	17878-69-2	104940	HMDB0030589	-	C03686	6709.31	7127.35	5464.1	8200.03	8250.1	7958.12	7034.51	7741.84	9165.89	7423.57	7891.62	8233.92	9393.78	7837.26	7016.43	5967.67	8623.18	5396.74	7972.9	6740.04	8145.42	7559.83	8448.32	8203.41	8327.27	8670.19	8607.24	8396.89
C18_positive	MW0137085	7-Hydroxywarfarin	7-羟基华法林	Heterocyclic compounds	杂环化合物	Heterocyclic compounds	杂环化合物	C19H16O5	307.096	324.1	5.1369	M+H-H2O	2.25965	2	0.8705	rp	17834-03-6	54682507	HMDB0140988	-	-	675065	630844	632382	791007	701381	686755	640522	695023	817785	665616	743499	747571	717433	854203	611047	639344	699655	605135	680508	611079	742443	755882	815942	755412	656127	658585	666578	657614
C18_positive	MW0000605	2-Chloro-4-fluorophenylacetic acid	2-氯-4-氟苯乙酸	Benzene and substituted derivatives	苯及其衍生物	Benzene and substituted derivatives	苯及其衍生物	C8H6ClFO2	132.958	188.004	13.8706	M+H-C4H8	2.4115	4	0.6932	rp	177985-32-9	2725061	-	-	-	9843.25	8987.19	9287.69	9023.6	11524.3	9852.56	11735.8	10579.5	11820.5	12083.4	12167.2	14066	11840.5	18530.6	10704.8	11934.7	12635.2	34083.4	11012.6	8991.51	18548.1	11001.9	11485.5	26103.2	12138.2	13095.1	13594.8	13298
C18_positive	MW0052447	Docosadienoate(22:2n6)	顺13,16-二十二碳二烯酸	Organic acid and Its derivatives	有机酸及其衍生物	Organic acid and Its derivatives	有机酸及其衍生物	C22H40O2	319.304	336.303	5.8825	M+H-H2O	11.5025	3	0.5508	rp	17735-98-7	5312554	HMDB0061714	-	-	57060.4	45720.7	55749.5	61842.1	62161.4	61337.4	49096.4	92795.6	80713.4	58547.7	54181.4	60942.6	64766.3	76726.4	74678.9	61586.5	61864.1	49305.3	82840.5	64540.5	66234.1	77514.8	73215.3	83829.5	69305.5	68649.6	69250.1	69805.1
C18_positive	MW0108795	N-Heptanoylhomoserine lactone	N-庚酰基高丝氨酸内酯	Aldehyde,Ketones,Esters	醛、酮、酯类	Esters	酯类	C11H19NO3	214.141	213.137	2.3249	M+H	6.4723	2	0.8027	rp	177158-20-2	443437	-	36736	-	3.803	11.527	4.26	4.009	3.364	12.202	22.499	5.969	11.412	8.741	13.747	11.125	2.536	4.476	4.535	3.012	2.067	6.202	7.051	5.953	8.355	10.828	4.05	1.706	116.799	115.589	116.643	111.784
C18_positive	MW0012968	1-hexadecanoyl-2-(9Z,12Z-octadecadienoyl)-sn-glycero-3-phosphocholine	1-Palmitoyl-2-linoleoyl-sn-glycero-3-phosphocholine	GP	甘油磷脂类	PC	磷脂酰胆碱	C42H80NO8P	780.552	757.562	11.7635	M+Na	0.150272	2	0.7256	rp	17708-90-6	5287971	HMDB0007973	-	-	39774.7	39652.3	49527.3	78655.8	75366.1	123255	46711.4	61213.3	55087.8	39780.8	31055.6	39220.3	58362.8	15934.1	31981.6	39597	27240.6	41638.5	61635.5	27662.2	44062.1	56788.8	24791.7	68872.5	44948.8	45530.8	43082.9	47139.3
C18_positive	MW0146516	Bacteriochlorophyll	细菌叶绿素	Others	其他	Others	其他	C55H74MgN4O6	911.561	910.546	12.2214	M+H	9.10237	3	0.9176	rp	17499-98-8	11953947	-	-	C11242	14330.8	10586.8	10672.4	11899.5	7057.71	8415.98	3931.07	5161.35	7605.35	7839.19	1605.38	4265.9	13141.9	13961.5	11059.3	11739.5	12426.1	7076.49	6046.7	5605.49	6751.47	9789.62	7901.58	7538.19	6346.27	7111.78	8154.7	7881.63
C18_positive	MW0154925	Parishin B	教区 B	Benzene and substituted derivatives	苯及其衍生物	Benzene and substituted derivatives	苯及其衍生物	C32H40O19	711.209	728.216	4.133	M+H-H2O	4.64068	4	0.8965	rp	174972-79-3	44715528	-	-	C17465	3150.58	2588.57	2344.12	3190.22	3587.13	2504.22	3008.58	1805.71	3506.68	2590.88	3106.7	3030.71	2917.72	3501.02	2491.34	2696.67	3237.76	2253.5	4058.09	3088.9	3200.87	2986.28	3602.91	3282.67	3113.41	3041.19	3024.1	3068.61
C18_positive	MW0137487	N-hydroxy-3-[(E)-3-(hydroxyamino)-3-oxoprop-1-enyl]benzamide	N-羟基-3-[(E)-3-(羟基氨基)-3-氧代丙基-1-烯基]苯甲酰胺	Alcohol and amines	醇、胺类	Amines	胺类	C10H10N2O4	223.064	222.064	10.7482	M+H	19.3206	2	0.6356	rp	174664-65-4	5353484	-	44839	-	40.434	53.787	92.966	78.127	48.994	114.212	290.76	155.342	205.145	64.915	42.384	59.613	85.45	512.162	166.838	27.296	54.05	33.211	47.143	42.108	206.885	35.381	298.989	250.979	3754.64	3678.11	3598.36	3716.01
C18_positive	MW0011618	(S)-(+)-2-Hydroxy-3-methylbutyric acid	(S)-(+)-2-羟基-3-甲基丁酸	Organic acid and Its derivatives	有机酸及其衍生物	Organic acid and Its derivatives	有机酸及其衍生物	C5H10O3	157.035	118.063	1.1229	M+K	21.2707	2	0.5519	rp	17407-55-5	853180	HMDB0000407	4129	-	6942.85	6298.9	6746.39	8102.06	6827.95	6930.46	7768.94	7293.7	8702.07	7050.81	7283.93	6617.28	7848.97	9158.75	6327.33	6990.4	7698.2	6011.83	8081.82	6634.97	7969.96	8309.28	8249.52	8153.46	7122.65	7170.34	7165.03	7139.44
C18_positive	MW0054522	1-O-Hexadecyl-lyso-sn-glycero-3-phosphocholine	1-O-Hexadecyl-lyso-sn-glycero-3-phosphocholine	GP	甘油磷脂类	LPC	溶血磷脂酰胆碱	C24H52NO6P	548.312	481.353	9.288	M-2H+3Na	10.7849	2	0.5501	rp	17364-21-5	3983	-	24070	-	3018.99	2866.37	3276.04	3522.61	3044.07	3376.57	5469.94	4957.65	6121.43	4785.15	4920.69	3757.05	4088.29	3643.95	2905.67	3236.84	3718.75	2807.54	4150.75	3797.64	4873.04	4213.81	6079.89	5856.56	3972.35	3862	3861.56	3978.75
C18_positive	MW0054524	LPC(16:0/0:0)	LPC(16:0/0:0)	GP	甘油磷脂类	LPC	溶血磷脂酰胆碱	C24H50NO7P	496.34	495.332	8.7355	M+H	0.875954	1	0.9682	rp	17364-16-8	460602	HMDB0010382	-	C04230	146866	139854	151058	152277	148939	160207	233494	258949	277119	232492	212782	211374	128995	161965	161812	146479	234243	329300	241874	333266	192458	170671	183549	171720	212767	214319	215436	213333
C18_positive	MW0001987	2-(Acetyloxy)-5-chlorobenzoic acid	2-(乙酰氧基)-5-氯苯甲酸	Benzene and substituted derivatives	苯及其衍生物	Benzene and substituted derivatives	苯及其衍生物	C9H7ClO4	200.997	214.003	12.7393	M+H-CH2	0.71625	4	0.7324	rp	1734-62-9	2820813	-	-	-	1683.52	1471.67	1296.82	1885.09	1929.47	1738.12	1663.67	1038.06	2219.66	2403.23	1849.95	1840.89	1699.35	1894.32	1265.82	1361.31	2258.18	1996.41	1494.26	1214.09	1543.09	2259.32	2079.13	1924.46	1865.89	1858.85	1832.85	1791.44
C18_positive	MW0110787	1-(4-Chloro-1,2,5-thiadiazol-3-yl)piperidine	1-(4-Chloro-1,2,5-thiadiazol-3-yl)哌啶	Heterocyclic compounds	杂环化合物	Heterocyclic compounds	杂环化合物	C7H10ClN3S	204.042	203.028	0.5534	M+H	4.0105	4	0.6592	rp	173053-54-8	808966	-	-	-	1675.95	1813.46	1703.71	1511.95	1805.69	1788.65	1712.2	1956.19	2666.32	2036.35	1942.96	1826.67	2027.15	1715.06	2407.31	1576.37	2684.63	3165.76	3746.89	2807.98	2972.04	3843.97	3502.17	3389.43	2885.68	2988.26	2888.19	2878.02
C18_positive	MW0150557	Glycerone sulfate	硫酸甘油;硫酸二羟基丙酮	Others	其他	Others	其他	C3H6O6S	154.977	169.988	0.2394	M+H-CH4	3.72825	4	0.665	rp	17302-80-6	439751	-	-	C02543	5217.17	5284.91	5569.87	6023.6	5395.18	4962.36	5484.38	3716.78	17331.9	5095.48	5222.67	5782.01	6775.75	6897.87	4969.81	5420.64	14673.5	1319.78	17551.6	14045.7	5900.83	1921.55	6277.55	6347.28	5513.43	5695.03	5803.82	5640.63
C18_positive	MW0126580	5-{9,32-Dihydroxy-6,10,13,20,32-pentamethyl-27-methylidene-33,34,35-trioxa-22-azahexacyclo[27.3.1.1^{1,4}.1^{4,7}.0^{12,17}.0^{17,23}]pentatriaconta-10,13,22-trien-14-yl}-3-methyloxolan-2-one	5-{9,32-Dihydroxy-6,10,13,20,32-pentamethyl-27-methylidene-33,34,35-trioxa-22-azahexacyclo[27.3.1.1^{1,4}.1^{ 4,7}.0^{12,17}.0^{17,23}]pentatriaconta-10,13,22-trien-14-yl}-3-methyloxolan-2-one	Aldehyde,Ketones,Esters	醛、酮、酯类	Esters	酯类	C42H63NO7	694.481	693.461	10.1239	M+H	19.6016	3	0.5521	rp	170713-72-1	10532690	HMDB0030492	-	-	1809.57	2534.17	965.789	2571.08	2326.47	1982.34	2459.94	3598.28	2681.55	2774.83	2287.67	1941.11	2368.68	2203.76	1851.85	1945.13	2453.17	2202.09	2331.39	1890.94	2144.39	2480.21	2798.06	2618.58	2435.44	2402.15	2457.48	2356.04
C18_positive	MW0111147	N-(5Z,8Z,11Z-eicosatrienoyl)-ethanolamine	N-(5Z,8Z,11Z-二十碳三烯酰基)-乙醇胺	Alcohol and amines	醇、胺类	Amines	胺类	C22H39NO2	350.305	349.298	5.852	M+H	2.05916	2	0.8907	rp	169232-04-6	16061185	-	-	-	10659.7	9027.32	27783.8	8871.76	8952.2	8003.43	234513	260128	265548	255054	235508	264304	107767	119597	116005	66978	76419.2	95008.4	128061	8.321	130716	121358	135489	147706	107286	108462	108145	108461
C18_positive	MW0006940	Drofenine	屈洛芬	Benzene and substituted derivatives	苯及其衍生物	Benzene and substituted derivatives	苯及其衍生物	C20H31NO2	318.243	317.236	9.1255	M+H	1.19825	4	0.9709	rp	1679-76-1	3166	-	44157	-	340.231	365.99	256.92	119.013	98.022	215.39	3998.89	4290.46	3791.85	4621.89	3548.74	3945.54	32.739	9.06	31.627	4.053	4.882	42.06	3.929	11.973	2.717	5.693	228.9	8.347	654.295	660.491	640.37	656.739
C18_positive	MW0127428	Cyclopentanethiol	环戊硫醇	Others	其他	Others	其他	C5H10S	133.031	102.05	1.1508	2M+Na+K	1.69725	4	0.7093	rp	1679-07-8	15510	HMDB0039771	-	-	533.018	533.98	254.208	438.371	6.177	627.159	901.973	895.768	766.628	418.037	538.582	953.405	326.536	291.926	318.225	242.062	475.209	566.349	696.615	260.96	78.093	364.1	277.697	380.801	1565.92	1532.72	1561.87	1559.55
C18_positive	MW0157398	Terpendole E	三萜E	Heterocyclic compounds	杂环化合物	Heterocyclic compounds	杂环化合物	C28H39NO3	438.298	437.293	9.0117	M+H	4.70508	3	0.7742	rp	167427-23-8	10094631	-	-	C20536	58234.2	50262.8	53404.4	55650.4	55878.4	60913.5	89669.7	104219	90940.8	80695.4	70650.8	79011.1	47164.1	44712	48870.1	49632.1	73501.1	85172.5	46315.1	52714.8	40172.1	35279.3	37635.9	36874.6	73854.7	73763	75335	74159
C18_positive	MW0148671	D-Ornithine hydrochloride	D-鸟氨酸盐酸盐	Amino acid and Its metabolites	氨基酸及其代谢物	Amino acid derivatives	氨基酸衍生物	C5H13ClN2O2	209.03	168.067	10.7482	3M+2Na+2K-H	1.1115	4	0.723	rp	16682-12-5 | 99815-05-1	443122	-	-	-	500683	493178	452525	566359	507578	488544	482872	413.955	570655	525376	533922	505513	136.173	1737.47	216.958	487540	509058	474059	556404	522771	523684	510901	667.617	510876	34219.7	28420.5	34665.6	36073.7
C18_positive	MW0126106	Phenyl piperidine-1-carboxylate	苯基哌啶-1-羧酸盐	Aldehyde,Ketones,Esters	醛、酮、酯类	Esters	酯类	C12H15NO2	236.089	205.11	5.7451	2M+Na+K	3.197	4	0.6761	rp	16641-71-7	283449	-	-	-	2359.53	1833.98	2217.04	2479.21	2063.35	2064.81	2080.55	2235.03	2952.88	2034.44	2090.65	1958.2	2208.95	2803.67	2108.56	1967.3	2077.46	2061.73	2552.14	1980.69	2165.65	2392.62	2389.9	2468.09	2324.95	2380.24	2414.72	2384.82
C18_positive	MW0154099	Lauramine oxide	月桂胺氧化物	Alcohol and amines	醇、胺类	Amines	胺类	C14H31NO	230.248	229.241	5.8825	M+H	8.58825	4	0.8254	rp	1643-20-5	15433	-	-	-	3377.24	3545.09	3076.7	3784.85	2903.33	5801.26	4253.17	7576.4	6434.8	3463.76	3699.11	4510.8	4569.85	3894.66	4432.89	3588.95	3738.24	2615.29	5064.95	2646.49	5194.98	4307.63	4865.62	5592.24	6664.91	6752.29	6648.93	6682.64
C18_positive	MW0152601	Leu-Glu	L-亮氨酸-L-谷氨酸	Amino acid and Its metabolites	氨基酸及其代谢物	Small Peptide	小肽	C11H20N2O5	261.145	260.137	2.659	M+H	0.7	3	0.5278	rp	16364-31-1	7009630	-	-	-	14.942	26.965	22.8	14.639	7.808	33.763	164.88	241.21	298.347	270.739	230.025	258.496	9.016	3.965	3.961	7.313	8.857	15.292	99.121	95.159	46.346	95.895	108.522	50.964	733.552	752.313	734.717	717.428
C18_positive	MW0110823	s-Triazine, 2-amino-4,6-dipiperidino-	s-三嗪，2-氨基-4,6-二哌啶基-	Alcohol and amines	醇、胺类	Amines	胺类	C13H22N6	301.142	262.191	9.1192	M+K	8.987	4	0.819	rp	16268-88-5	204417	-	-	-	83027.8	58950.3	70054.2	125748	128959	76770.5	84999.9	74794.7	100238	89082.7	75787.7	82078.6	67088	78882.6	68554.8	70751.4	49668.7	67683.6	83922.6	71718.2	98838.3	64903	67563.3	84807.4	61998.7	64059.7	60642.1	62713.1
C18_positive	MW0054553	LPC(22:6/0:0)	LPC(22:6/0:0)	GP	甘油磷脂类	LPC	溶血磷脂酰胆碱	C30H50NO7P	568.34	567.332	8.3382	M+H	0.89859	4	0.978	rp	162440-05-3	10415542	HMDB0010404	-	C04230	6567	4416.15	6855.94	6273.81	5352.68	5382.91	12854.6	13547.4	15598.8	12668.7	10741.1	12040.7	4875.29	2328.95	8168.85	2724.12	6616.88	13003.7	10935	19282.6	6525.57	8988.3	7842.05	8742.67	6163.29	6419.94	6157.52	6002.59
C18_positive	MW0054456	Lupenone	羽扇豆酮	Aldehyde,Ketones,Esters	醛、酮、酯类	Ketones	酮类	C30H48O	213.185	424.37	8.6536	M+2H	8.28599	4	0.5804	rp	1617-70-5	92158	-	71486	C16990	2.822	7.651	3.528	5.263	5.796	4.854	4.405	4.088	10.291	5.873	4.2	3.362	8.526	10.835	2.444	0.812	5.935	5.241	2.156	3.261	4.855	4.431	8.098	7.937	152.341	152.361	152.335	145.959
C18_positive	MW0104999	Ethyl 3-cyclohexyl-3-oxopropanoate	3-环己基-3-氧代丙酸乙酯	Others	其他	Others	其他	C11H18O3	199.132	198.126	3.9371	M+H	1.01375	4	0.7253	rp	15971-92-3	266327	-	-	-	3.043	2.383	3.053	4.851	4.431	3.944	7.358	5.415	1.934	2.167	3.972	2.312	4.947	30.188	1.816	2.582	2.722	1.783	3.533	2.807	3.228	3.559	6.491	6.931	216.928	217.65	214.956	213.911
C18_positive	MW0111311	Tetrapentylammonium	四戊铵	Others	其他	Others	其他	C20H44N+	343.312	298.347	8.9349	M-H+2Na	17.1476	2	0.6643	rp	15959-61-2	17249	-	-	-	200793	210636	133387	226663	163544	149973	167290	160820	276414	167147	168971	110644	185149	204721	236628	176787	219602	184858	110312	174665	117962	164631	231800	148128	134504	127728	125140	116712
C18_positive	MW0107606	Jubanine C	朱巴宁C	Benzene and substituted derivatives	苯及其衍生物	Benzene and substituted derivatives	苯及其衍生物	C39H47N5O5	666.368	665.358	11.8999	M+H	3.484	3	0.7399	rp	159226-00-3	131752168	HMDB0037300	-	-	6787.86	6879.94	6783.32	7394.76	6097.53	10295.7	23263.2	17404.6	21943	13487.1	9673.14	11199.8	11425.4	13721.2	9797.8	10069.6	8251.42	8897.42	9982.24	13944.7	13041.4	24095.2	16054.9	26114.5	10376.6	8585.67	8531.46	10444.1
C18_positive	MW0113890	Glucochloralose	葡萄糖氯醛糖	Carbohydrates and Its metabolites	碳水化合物及其代谢物	Sugars	糖类	C8H11Cl3O6	325.991	307.962	4.4701	M+NH4	13.3682	2	0.716	rp	15879-93-3	85991	HMDB0031727	-	-	6253.29	5699.12	5532.92	6087.07	6507.64	5890.21	5610.62	6376.98	7323.45	6778.21	6496.75	5845.99	6595.34	6938.9	5158.76	5749.6	5844.76	4983.91	6241.85	6212.74	7173.15	5905.41	6815.58	6910.02	6577.65	6708.38	6579.29	6487.31
C18_positive	MW0053880	Hericene C	海丽辛C	Others	其他	Hydrocarbon derivatives	烃衍生物	C37H60O5	602.475	584.444	10.1881	M+NH4	4.55283	3	0.5495	rp	157207-56-2	92035057	HMDB0041181	-	-	29756.4	27163.2	27494.3	31898.4	29967.5	29515.1	31488.3	45331.1	38676.6	33854	32515.8	28790.1	33302.4	36764.3	27489.9	26056.7	30909.5	27761.2	31961.1	31864.8	33061.7	35343.3	36133.3	36889.1	30852.8	31268.4	30795.8	29985.6
C18_positive	MW0063393	S-1 Methanandamide	S-1甲酰胺	FA	脂肪酰类	Oxidized lipids	氧化脂质	C23H39NO2	344.296	361.298	6.1428	M+H-H2O	0.878816	2	0.9017	rp	157182-50-8	5283423	-	64921	-	3063.09	2895.16	2695.14	2756.29	2826.85	2560.73	15696.7	16423.8	17579.7	19110.1	17580.7	22366.1	45.838	23.925	9.119	19.91	9.181	9.005	47.91	87.086	479.121	3.753	29.493	21.851	5267.43	5271.86	5292.35	5187.39
C18_positive	MW0011574	Methanandamide	甲南酰胺	FA	脂肪酰类	Others	其他	C23H39NO2	361.293	361.298	6.2031	M+	11.7469	2	0.6905	rp	157182-49-5	6321351	-	36710	-	840.005	1017.97	727.911	158.325	459.602	107.047	24101	24921.7	25573.6	25577.3	24744.2	25145.4	386.954	395.021	939.182	739.425	994.86	984.511	7843.47	8473.13	5022.41	3969.81	7264.33	6543.18	7542.42	7575.52	7620.1	7442.85
C18_positive	MW0007155	Flavidulol D	黄酮醇D	Benzene and substituted derivatives	苯及其衍生物	Phenolics	苯酚类	C35H56O3	542.453	524.423	11.4298	M+NH4	8.26391	3	0.5587	rp	156980-40-4	131752918	HMDB0040736	-	-	32408.3	27931.9	28894.2	33991.1	29880.4	31381.1	33706.2	46539.7	42749.2	34420.6	37459.6	33935.3	33709.9	38664.5	28972.7	29934.7	34120.3	28611.1	34948.1	33676.9	34332.2	42790	37067.5	38535.2	31575.4	31400.4	31241.1	31428.1
C18_positive	MW0055326	N-methyl arachidonoyl amine	N-甲基花生四烯胺	FA	脂肪酰类	Others	其他	C21H35NO	318.281	317.272	6.2185	M+H	2.73116	2	0.9108	rp	156910-29-1	5283392	-	36679	-	191263	195446	184419	211273	187416	190919	920234	919593	969178	960925	853689	879734	99350.3	173036	183287	193327	190495	199838	140637	150191	286589	297445	322340	344767	308005	309724	313250	303193
C18_positive	MW0103096	Vinaginsenoside R14	-	Terpenoids	萜类	Triterpene Saponin	三萜皂苷	C41H70O15	841.431	802.471	2.7577	M+K	11.8035	4	0.5271	rp	156398-73-1	85084513	HMDB0040779	-	-	37.2	222.643	6.071	49.699	39.026	24.352	16.222	105.619	61.675	5.146	33.51	57.659	26.993	249.79	24.294	30.749	102.157	19.892	45.231	23.033	41.971	32.382	15.067	72.038	133.208	137.613	140.783	120.489
C18_positive	MW0111175	BQ-788	BQ-788	Amino acid and Its metabolites	氨基酸及其代谢物	Small Peptide	小肽	C34H50N5NaO7	434.34	663.361	8.843	M+H	0.795275	2	0.8915	rp	156161-89-6	16759603	-	44013	-	346.433	589.027	807.641	504.819	547.883	521.415	5008.3	6790.3	5733.56	5405.98	7335.91	6068.02	2747.83	2972.87	2666.28	3119.64	4257.23	3426.26	15510.4	17826	14974.9	15435.7	14503.8	15620.5	7797.15	7816.96	7785.67	7859.75
C18_positive	MW0159937	Malonate	丙二酸	Aldehyde,Ketones,Esters	醛、酮、酯类	Esters	酯类	C3H2O4-2	157.975	101.995	12.7545	M+K+NH3	15.7715	4	0.7272	rp	156-80-9	9084	-	-	-	107337	45346.3	81063.4	173180	132817	74178.8	48617.2	220578	114130	146155	161411	134929	96266.4	61332.1	59994.4	58124.1	158807	72779.8	73431.6	47256	155843	122566	88485.6	71308.1	121550	122506	113182	114076
C18_positive	MW0005121	4-Hydroxyphenylpyruvic acid	4-羟基苯基丙酮酸	Benzene and substituted derivatives	苯及其衍生物	Benzene and substituted derivatives	苯及其衍生物	C9H8O4	163.039	180.042	5.9044	M+H-H2O	0.843996	2	0.8362	rp	156-39-8	979	HMDB0000707	5675	C01179	189859	227295	184661	162164	225189	172494	196265	284883	217069	188721	179640	134870	273181	268175	141992	201924	189785	214158	241289	223260	242072	263920	236510	263967	198035	200494	193742	194581
C18_positive	MW0148480	PC(O-16:0/20:3(8Z,11Z,14Z))	PC(O-16:0/20:3(8Z,11Z,14Z))	GP	甘油磷脂类	PC	磷脂酰胆碱	C44H84NO7P	808.583	769.598	7.9209	M+K	24.5388	2	0.6016	rp	155575-01-2 | 131907-73-8	16759365	-	43415	-	50853.3	41509	45540.2	35864.3	39758.1	37317.2	40229.3	31324.1	40191.1	68105.4	50395.1	56634.1	77411.8	76125.7	61624	58584.8	38253.1	51157	43137.6	35519.3	18582.2	34257.9	8370.97	14091.8	46793.5	39710.7	47400.6	51166.8
C18_positive	MW0169982	Tyramine	酪胺	Benzene and substituted derivatives	苯及其衍生物	Phenolics	苯酚类	C8H11NO	176.037	137.084	1.5761	M+K	24.65	3	0.59	rp	154375-43-6	5610	-	-	C00483	283.841	552.136	802.73	395.753	244.604	170.319	952.272	814.019	387.222	852.511	804.313	882.116	211.579	282.322	517.814	647.447	634.471	1308.8	1393.47	660.686	1095.29	927.809	875.406	1655.26	3496.53	3476.4	3551.34	3538.76
C18_positive	MEDP0594	Dihydroactinidiolide	二氢猕猴桃内酯	Aldehyde,Ketones,Esters	醛、酮、酯类	Esters	酯类	C11H16O2	181.122	180.115	6.4845	M+H	2.04923	1	0.7234	rp	15356-74-8	27209	HMDB0035240	-	-	15.089	14.788	12.643	17.471	16.057	18.941	12.252	6.42	13.256	13.118	8.27	9.728	21.382	55.015	18.356	15.387	18.294	19.749	15.707	21.992	23.7	22.958	24.717	21.41	332.231	342.651	337.512	338.183
C18_positive	MW0114927	Metamfepramone	安非他酮	Benzene and substituted derivatives	苯及其衍生物	Benzene and substituted derivatives	苯及其衍生物	C11H15NO	178.116	177.115	4.5004	M+H	16.7093	2	0.8262	rp	15351-09-4	71872	-	85077	-	37774.7	35146.8	35052.5	41305.6	35910.9	37932.4	40653	40509.6	47349.5	41684.8	39510.7	39971.5	42359.7	47218.3	37062.5	36322.6	37157.7	30445.2	43183.2	38932.8	43196.1	46567.6	45540.9	50994.5	34830.5	32273.6	34314.4	33730.4
C18_positive	FDATN00433	Diclofenac potassium	-	Others	其他	Medicine	药物	C14H10Cl2KNO2	355.954	332.973	0.5499	M+Na	13.9163	4	0.7493	rp	15307-81-0	23667642	-	-	-	1915.05	3052.8	2396.91	1771.38	3423.43	2598.24	3063.98	2283.74	4829.01	3525.96	4466.06	3139.73	2603.93	3261.18	3373.27	2783.18	3581.74	3890.71	5197.48	5116.15	7351.69	6426.07	6112.09	5832.62	4450.38	4384.1	3909.18	4478.24
C18_positive	MW0009776	Sufentanil	舒芬太尼	Benzene and substituted derivatives	苯及其衍生物	Benzene and substituted derivatives	苯及其衍生物	C22H30N2O2S	387.206	386.203	4.2581	M+H	14.2043	2	0.7086	rp	151590-36-2	41693	HMDB0014846	-	C08022	1421.33	1149.94	1733.5	1424.29	895.471	1075.97	806.772	1044.53	1481.34	636.311	619.592	787.863	1293.14	2497.53	1333.48	601.331	777.998	1506.5	292.372	644.236	498.713	1065.46	1680.74	1177.58	2020.76	2087.55	2228.26	1875.54
C18_positive	MW0052907	Fevicordin B 2-gentiobioside	Fevicordin B 2-龙胆二糖苷	Aldehyde,Ketones,Esters	醛、酮、酯类	Esters	酯类	C43H64O18	851.398	868.409	7.7532	M+H-H2O	7.87422	3	0.5199	rp	151589-22-9	131751699	HMDB0035296	-	-	3168.69	9514.23	18087.7	6650.59	10507.1	4040.76	3579.26	5034.32	4036.38	3686.79	6782.47	1827.16	3620.61	4963.27	5572.89	4043.43	3660.43	6525.23	5739.72	5376.76	5059.56	4429.53	12586.4	3020.16	5336.02	5139.23	4757.41	5616.69
C18_positive	MW0117872	2,4,12-Octadecatrienoic acid piperidide	2,4,12-十八碳三烯酸哌啶	Organic acid and Its derivatives	有机酸及其衍生物	Organic acid and Its derivatives	有机酸及其衍生物	C23H39NO	346.311	345.303	6.2491	M+H	0.0143138	3	0.8207	rp	151391-71-8	131751247	HMDB0032034	-	-	24221.1	28757.9	20820	31984.7	29784.7	25266.5	101977	114091	107387	117733	81317.1	106278	30313.6	29540.2	19259	23102.2	22300.3	16819.1	37826.6	29385.7	60457.1	81060.2	50992.2	96542.5	29933.5	29955.1	30617.3	29498.7
C18_positive	MW0013129	2,4,14-Eicosatrienoic acid isobutylamide	N-异丁基-2，4，14-二十碳三烯酰胺	FA	脂肪酰类	Others	其他	C24H43NO	362.327	361.334	5.9132	M+H	36.1627	4	0.582	rp	151391-70-7	10338645	HMDB0032032	-	-	74046.6	70453.4	81858	87665.8	77200	87577.7	71013.4	140971	112378	80896.1	84999.9	89151.2	78821.3	104184	85475.7	70604.3	75831.2	66398.1	101905	94011.4	76412.7	95493.3	81418.1	97189.1	91325.9	93120.2	93985	93082.2
C18_positive	MW0157393	Terminaline	特米拉林	Hormones and hormone related compounds	激素及激素相关物质	Hormones and hormone related compounds	激素及激素相关物质	C23H41NO2	364.317	363.314	6.1578	M+H	1.01161	3	0.9	rp	15112-49-9	177562	-	-	C10825	41533.5	43466.7	42383.2	41964	35954.4	37706.1	146336	148800	145981	398441	374894	420000	35.016	115031	14.304	12.076	87673.1	4.552	164343	31.591	279360	153607	59.515	261954	127404	131126	128611	121335
C18_positive	MW0111149	Dihomo-gamma-linolenoylethanolamide	8，11，14-二十碳三烯酰乙醇酰胺；N-(8Z，11Z，14Z-二十碳三烯酰基)-乙醇酰胺	Alcohol and amines	醇、胺类	Amines	胺类	C22H39NO2	350.305	349.298	5.5769	M+H	1.14196	2	0.9252	rp	150314-34-4	5282272	HMDB0013625	-	C13828	15272.5	13063.8	13651.4	15001	12272.5	11209.3	49480.7	53765	45569.1	49867.4	50052.9	51065.8	6036.21	2862.16	7432.51	7086.68	11430.4	11085.6	20026.7	29823	9840	15935.3	9044.26	16411.8	13490.7	13534.9	14047.2	14145.8
C18_positive	MW0061660	Phytol	植物醇	Terpenoids	萜类	Tetraterpenes	四萜	C20H40O	360.32	296.308	8.9349	M+CH3CN+Na	11.1708	2	0.6137	rp	150-86-7	5280435	HMDB0002019	391	C01389	865101	943242	698466	752676	715785	653606	684146	644997	1.0566e+06	640504	729710	489848	699399	745426	924625	726090	923252	714375	643300	406770	869920	693651	594724	637072	580207	562537	553573	486467
C18_positive	MW0004631	p-Aminobenzoic acid	4-氨基苯甲酸	Organic acid and Its derivatives	有机酸及其衍生物	Organic acid and Its derivatives	有机酸及其衍生物	C7H7NO2	137.046	137.048	0.8383	M+	3.7334	2	0.6732	rp	150-13-0	978	HMDB0001392	3261	C00568	19323.5	15299.3	16380.7	17443.5	14272.9	16802.7	54112.9	41821.6	39242.4	44978.4	47777.2	46407	8860.07	6874.06	5843.7	6449.02	6382.97	7437.78	39206	14331.2	34887	33238.3	35112.2	36287.1	16915.1	16715.2	16787.1	16132.6
C18_positive	MW0009745	Simeconazole	西甲康唑	Benzene and substituted derivatives	苯及其衍生物	Benzene and substituted derivatives	苯及其衍生物	C14H20FN3OSi	294.145	293.136	1.561	M+H	1.55814	2	0.7243	rp	149508-90-7	10085783	-	-	C18544	3785.14	3854.32	4332.47	3931.28	4080.16	3756.42	2.449	21429.8	21072.7	24383.5	21983.2	31419.9	19459.4	15823.3	5.598	6206.21	1022.16	9.674	3583.43	2.669	8990.92	3021.55	7569.11	10139.1	5230.28	5462.22	5338.52	5433.33
C18_positive	MW0107633	L-alpha-Aminobutyric acid	L-2-氨基丁酸	Amino acid and Its metabolites	氨基酸及其代谢物	Amino acids	氨基酸	C4H9NO2	121.101	103.063	4.0215	M+NH4	8.98449	2	0.5099	rp	1492-24-6	80283	HMDB0000452	12	C02356	1.097	0.748	1.113	0.767	1.006	0.296	0.608	1.965	1.009	0.871	1.02	0.153	1.354	6.176	1.234	0.552	1.515	1.197	1.428	1.672	1.457	0.849	2.064	0.93	64.22	65.764	65.155	65.586
C18_positive	MW0111014	(1R,2R)-1-phenyl-2-palmitoylamino-3-morpholino-1-propanol	-	Heterocyclic compounds	杂环化合物	Heterocyclic compounds	杂环化合物	C29H50N2O3	513.344	474.382	8.3306	M+K	1.80529	4	0.7068	rp	149022-18-4	3008318	-	43408	-	54.839	70.653	74.121	28.532	16.952	57.844	37.803	73.705	143.678	104.099	47.032	215.046	48.085	31.304	60.985	20.793	49.938	58.142	457.625	953.953	535.179	686.565	355.684	642.374	204.945	204.168	217.836	159.367
C18_positive	MW0168263	Phosphite	亚磷酸盐	Others	其他	Metal, Non-metal and related compounds	金属、非金属及相关物质	H3O3P	124.024	81.982	0.5516	M+CH3CN+H	20.7192	3	0.7938	rp	14901-63-4	107909	HMDB0001443	-	-	53953.7	54316.8	54921.6	59694.2	63280	61392.8	63420.9	60984.6	87040.6	68601.2	74682.8	63258.5	66347.3	63767.9	83970.6	75027.3	85808.7	99223.4	119031	97418.1	105164	112213	112570	110065	97490.1	97232.2	98606.3	98292.8
C18_positive	MW0009447	Phoxim	辛硫磷	Benzene and substituted derivatives	苯及其衍生物	Benzene and substituted derivatives	苯及其衍生物	C12H15N2O3PS	281.052	298.054	9.6847	M+H-H2O	2.15707	2	0.7109	rp	14816-18-3	9570290	-	-	C18757	120.545	111.229	127.799	173.818	137.585	175.578	245.855	179.437	178.799	121.225	71.1	119.469	464.793	805.61	93.646	82.32	104.77	102.442	86.107	103.591	127.972	137.854	378.047	390.516	6368.84	6126.26	6358.27	6265.1
C18_positive	MW0159883	Sulfate	硫酸盐	Others	其他	Metal, Non-metal and related compounds	金属、非金属及相关物质	O4S-2	140.002	95.9517	12.2521	M+CH3CN+H	0.504607	3	0.9208	rp	14808-79-8	1117	HMDB0001448	3233	C00059	48161.2	34092	39301.9	52297.7	48705.9	44920.9	42553.1	41769.3	61500.4	44421.3	57827.9	52884.2	43599.7	57832.7	40597.1	47895.1	47072.4	43075.1	56801.5	40538.8	59332.3	55758.3	54828.6	62197.5	50634.7	49711.9	50119	48473.3
C18_positive	MW0159873	Nitrate	硝酸盐	Others	其他	Metal, Non-metal and related compounds	金属、非金属及相关物质	NO3-	63.9977	61.9878	0.8533	M+H	12.9188	3	0.74	rp	14797-55-8	943	HMDB0002878	3208	C00244	248513	222705	232315	281779	238056	254171	247943	263181	304794	283403	257643	259018	281066	303345	223494	227335	247064	213288	279985	244015	270482	279888	282197	298224	253906	254275	253157	252553
C18_positive	MW0148171	Deacetylcephalosporin C	去乙酰头孢菌素C	Heterocyclic compounds	杂环化合物	Heterocyclic compounds	杂环化合物	C14H19N3O7S	429.089	373.094	11.3085	M+K+NH3	1.573	4	0.9622	rp	1476-46-6	160577	-	-	C03112	500.41	744.944	454.145	1076.81	726.931	531.464	624.109	270.755	911.471	616.55	771.204	400.458	1600.14	238.312	301.833	196.534	554.596	566.104	2617.4	433.291	656.452	619.29	1066.47	783.014	1816.3	1670.06	1360.68	1972.26
C18_positive	MW0063241	Pyripyropene A	吡唑啉 A	Terpenoids	萜类	Sesquiterpenoids	倍半萜	C31H37NO10	652.23	583.242	0.755	M+Na+HCOOH	3.86356	4	0.6622	rp	147444-03-9	11828024	-	-	-	64.042	37.639	11.044	69.878	59.563	56.161	2750.82	2037.56	595.347	1194.06	88.755	636.952	353.116	210.175	45.789	78.026	90.61	78.894	1733.82	260.174	3569.03	1015.27	3143.53	4821.66	346.258	373.144	345.086	397.03
C18_positive	MW0169367	L-Proline	L-脯氨酸	Amino acid and Its metabolites	氨基酸及其代谢物	Amino acids	氨基酸	C5H9NO2	116.07	115.063	0.7777	M+H	1.21593	1	0.9478	rp	147-85-3	145742	HMDB0000162	29	C00148	36594.5	42593.5	48327.8	50090.5	26729.3	37271.7	20953.9	18944.9	13622	17638.8	14701.6	17839.6	27385.1	29147.8	15278.9	19713.3	9450.12	10257.5	10518	6449.09	19517.6	17067	19016.8	18060.8	16938.5	17027.1	17056	17104.4
C18_positive	MW0110915	Arachidonoyl Thio-PC	花生四烯酰硫代PC	Benzene and substituted derivatives	苯及其衍生物	Benzene and substituted derivatives	苯及其衍生物	C44H82NO6PS	784.584	783.56	12.1902	M+H	18.4701	2	0.8688	rp	146797-82-2	53394300	-	63010	-	96915.5	50109.4	54880.9	72717.6	68746.2	85024.3	86103.1	194766	78504.8	73162.8	71000.6	71209.9	187977	192061	190988	171494	51779.5	62925.8	112589	102055	68959.2	78587.5	56070.3	49782.4	198438	165782	182414	181684
C18_positive	MW0125592	Todralazine	妥拉嗪	Heterocyclic compounds	杂环化合物	Heterocyclic compounds	杂环化合物	C11H12N4O2	279.111	232.096	1.3945	M+HCOO+2H	11.2715	2	0.6598	rp	14679-73-3	5501	-	43492	-	180.786	1411.64	2043.48	1985.52	267.367	397.112	1234.55	1385.91	1250.65	585.171	736.521	1627.31	1863.17	1365.62	233.586	357.463	1066.72	460.28	1246.84	182.744	882.455	1211.45	2215.91	254.966	1921.14	1644.22	1736.63	890.959
C18_positive	MW0115121	Phenyl beta-D-glucopyranoside	芳基β-D-葡萄糖苷	Benzene and substituted derivatives	苯及其衍生物	Benzene and substituted derivatives	苯及其衍生物	C12H16O6	279.075	256.095	12.7317	M+Na	4.22075	4	0.6549	rp	1464-44-4	65080	-	-	C03097	7463.69	7756.28	5897.07	6041.55	5126.83	6491.5	5441.92	6725.02	7030.15	5375.55	5282.24	5930.22	11852.1	7823.61	6504.34	6080.71	6310.21	8528.83	5172.18	5811.33	5803.52	5419.27	7113.56	5998.57	6538.23	6303.65	6722.9	6534.69
C18_positive	MW0103656	5-Methyluridine	5-甲基尿苷	Nucleotide and Its metabolites	核苷酸及其代谢物	Nucleotide and Its metabolites	核苷酸及其代谢物	C10H14N2O6	223.064	258.085	9.6829	M+H-2H2O	17.2878	2	0.5613	rp	1463-10-1	445408	HMDB0000884	5843	-	63.417	56.915	99.618	111.669	57.037	113.325	161.723	120.489	108.235	76.593	74.201	75.536	150.89	630.164	42.732	62.436	54.565	94.588	286.528	119.46	58.756	59.698	275.839	233.285	4895.74	4875.66	4847.43	4822.84
C18_positive	MW0007822	Mitoglitazone	米托格列酮	Benzene and substituted derivatives	苯及其衍生物	Phenolics	苯酚类	C19H18N2O4S	371.102	370.099	11.1265	M+H	10.4587	2	0.7016	rp	146062-49-9	10429242	-	63083	-	15343	6737.47	8080.61	8474.02	12324	7406.1	18055.6	5944.93	21235.6	6162.57	13864	4109.24	5169.72	4917.61	3568.68	4922.59	6819.81	6377.73	5326	6654.64	7719.98	9631.69	21543.2	7919.47	28486.7	28258.3	28493.4	28017.2
C18_positive	MW0112781	Dibenz(b,f)(1,4)oxazepine-10(11H)-carboxylic acid, 8-chloro-, 2-(1-oxo-3-(4-pyridinyl)propyl)hydrazide, monohydrochloride	二苯并(b,f)(1,4)oxazepine-10(11H)-羧酸，8-氯-，2-(1-氧代-3-(4-吡啶基)丙基)酰肼，单盐酸盐	Benzene and substituted derivatives	苯及其衍生物	Benzene and substituted derivatives	苯及其衍生物	C22H20Cl2N4O3	423.119	458.091	4.133	M+H	9.802	2	0.8705	rp	146033-02-5	132748	-	45341	-	73942.1	62139.4	65319.6	77819.4	69059.6	71858.3	71017.1	72355	77770.5	75612.2	77717.3	65986.7	74706.7	86782.1	62845.5	68545.7	74879.9	61639.4	80800.4	66348.6	72504.8	78815.5	73996.6	81393.8	66965.7	68124.5	67165.6	65891.5
C18_positive	MW0103557	Flavin adenine dinucleotide	核黄素-5'-腺嘌呤二磷酸	Nucleotide and Its metabolites	核苷酸及其代谢物	Nucleotide and Its metabolites	核苷酸及其代谢物	C27H33N9O15P2	786.165	785.157	3.0086	M+H	1.21636	1	0.8313	rp	146-14-5	643975	HMDB0001248	6106	C00016	4026.45	3514.91	3910.05	3488.33	3511.18	3116.67	3986.89	4284.11	2973.22	3732.26	2976.03	3675.22	2945.92	2709.51	3291.26	2833.8	3078.51	4577.51	2886.9	3391.05	2867.47	3295.81	3387.96	2900.33	8419.76	7748.8	8799.2	8396.05
C18_positive	MW0112696	3,4-Dicaffeoylquinic acid	3,4-二咖啡酰奎宁酸	Organic acid and Its derivatives	有机酸及其衍生物	Organic acid and Its derivatives	有机酸及其衍生物	C25H24O12	499.128	516.127	9.5476	M+H-H2O	9.27976	2	0.9081	rp	14534-61-3	5281780	HMDB0030705	-	C10468	46343.7	45050.9	39634.6	41630.5	35884.6	36106.3	124.302	89.467	20.427	49582.9	50389.5	47708.4	16395.3	56827.3	283.318	46007.8	48018.8	44428.8	20565.4	49353.9	49692.6	48273	44802	40.68	30471.9	37005.1	36114.9	35040.6
C18_positive	FDATP01173	Pixantrone dimaleate	-	Others	其他	Medicine	药物	C25H27N5O10	544.17	557.176	4.133	M+H-CH2	7.55178	4	0.5928	rp	144675-97-8	9937618	-	-	-	1031.76	889.854	385.483	997.922	372.507	871.702	985.365	1022.03	919.861	661.282	843.998	422.811	668.821	1401.75	27.654	805.736	470.266	84.506	489.775	410.147	530.003	1193.46	406.432	431.506	941.807	923.07	903.981	961.91
C18_positive	MW0121529	5-Hydroxy-7-methoxy-2-tritriacontyl-4H-1-benzopyran-4-one	5-羟基-7-甲氧基-2-三十二烷基色酮	Benzene and substituted derivatives	苯及其衍生物	Benzene and substituted derivatives	苯及其衍生物	C43H74O4	677.548	654.559	9.8205	M+Na	0.441366	4	0.7391	rp	144049-68-3	5322151	HMDB0039739	-	-	4104.57	7618.7	6258.54	8866.73	7405	7729.25	3321.72	3390.4	3317.24	6255.57	6532.32	7048.47	213.858	2902.63	3289.4	4145.8	4244.32	4162.62	250.709	2781.97	2323.65	2491.65	3600.5	3619.09	5290.14	3389.04	5601.72	5685.02
C18_positive	MW0054368	Linalyl propionate	丙酸芳樟酯	Aldehyde,Ketones,Esters	醛、酮、酯类	Esters	酯类	C13H22O2	183.138	210.162	4.877	M+H-C2H4	0.05	4	0.7488	rp	144-39-8	61098	HMDB0030425	-	-	0.157	0.149	0.023	0.198	0.154	0.118	0.614	0.281	0.139	0.061	0.029	0.133	0.324	0.852	0.172	0.037	0.128	0.16	0.068	0.078	0.155	0.276	0.308	0.218	59.083	64.487	62.207	54.807
C18_positive	MW0009981	Trihexyphenidyl	苯并噻吩基	Benzene and substituted derivatives	苯及其衍生物	Benzene and substituted derivatives	苯及其衍生物	C20H31NO	302.248	301.241	10.2791	M+H	5.2795	2	0.9254	rp	144-11-6 | 40520-25-0	5572	HMDB0014520	2936	C07171	7687.84	6594.14	7969.03	7083.17	6454.19	4065.64	67973.7	69116.8	72073.7	73623.4	63253.9	65979.7	6008.28	5687.56	7396.88	7052.62	11375.5	9.393	9969.06	29679.8	19577.9	15858.8	17995.3	13.798	12784	12722.1	12715.8	12808.4
C18_positive	MEDL02332	FFA(12:0)	十二烷酸(月桂酸)	FA	脂肪酰类	FFA	游离脂肪酸	C12H24O2	183.174	200.178	7.0562	M+H-H2O	3.42475	4	0.6713	rp	143-07-7	3893	HMDB0000638	5611	C02679	0.113	0.155	0.096	0.146	0.074	0.067	0.892	0.524	0.323	0.167	0.11	0.13	0.159	7.031	0.045	0.228	0.154	0.053	0.068	0.185	0.129	0.264	0.766	0.61	49.856	50.608	50.896	50.906
C18_positive	MW0106498	3-Hydroxyoctanoic acid	3-羟基辛酸酯；3-羟基辛酸	Organic acid and Its derivatives	有机酸及其衍生物	Organic acid and Its derivatives	有机酸及其衍生物	C8H16O3	143.106	160.11	2.7501	M+H-H2O	2.63875	4	0.6882	rp	14292-27-4 | 88930-08-9 | 120659-38-3	26613	HMDB0001954	35403	C20793	143	207.388	225.506	225.018	60.738	128.161	134.384	140.555	193.525	75.954	176.595	245.305	123.805	311.769	34.964	120.461	86.899	73.784	81.462	44.018	201.789	64.477	296.131	216.006	1246.23	1234.82	1236.34	1220.25
C18_positive	MW0007171	Flufenacet	氟哌酸	Heterocyclic compounds	杂环化合物	Heterocyclic compounds	杂环化合物	C14H13F4N3O2S	364.066	363.067	0.8383	M+H	20.914	2	0.8068	rp	142459-58-3	86429	-	72506	C18731	14155.5	12049.8	11647	9488.08	9917.06	9578.13	5331.35	3444.67	4316.82	5129.11	5454.57	5124.79	7194.64	7398.75	6588.71	7456.47	9759.42	9727.35	4685.59	6430.04	6626.18	3537.15	3969.17	3820.17	8998.14	8940.93	9497.24	9224.33
C18_positive	MW0169792	N-[(2R)-1-Hydroxypropan-2-yl]hexadecanamide	N-[(2R)-1-Hydroxypropan-2-yl]hexadecanamide	FA	脂肪酰类	Others	其他	C19H39NO2	314.305	313.298	6.3564	M+H	0.999231	2	0.9143	rp	142128-47-0	15667271	-	62965	-	21301.7	17337.4	37775.4	21877.7	18829.3	20261	213113	115886	225159	122528	117615	121888	8536.48	13475.5	14201.3	15475.3	19196.1	6812.19	12766.7	15956.1	4262.51	6449.76	2756.59	2437.23	34816.3	34965.4	35007.5	36075.7
C18_positive	MW0114363	Dronedarone	决奈达隆	Aldehyde,Ketones,Esters	醛、酮、酯类	Ketones	酮类	C31H44N2O5S	557.293	556.297	10.3583	M+H	17.7561	2	0.6869	rp	141626-36-0	208898	HMDB0251621	-	D02537	10469.4	10065.6	10963.8	12402.9	12563.6	12919.4	29186.5	24722	24842.6	14337.8	14453.2	11725.4	20443.1	17751.5	15945.2	15091.6	14810.2	9923.57	12456.2	9366.15	16966.6	15676.2	48066.1	33521.7	6554.87	6475.2	6188.34	6433.37
C18_positive	MW0120192	4-Amino-3,5,6-trichloropyridine-2-carbonitrile	4-氨基-3,5,6-三氯吡啶-2-甲腈	Heterocyclic compounds	杂环化合物	Heterocyclic compounds	杂环化合物	C6H2Cl3N3	259.896	220.931	12.6104	M+K	11.0755	4	0.5374	rp	14143-60-3	84225	-	-	-	2115.11	1912.63	1616.85	1639.23	1447.76	1575.54	2021.55	1805.17	1986.08	1058.22	1957.34	1712.18	2107.8	1932.78	1687.27	2249.7	1865.72	2129.53	1806.5	1898.38	2169.31	2210.49	2447.99	1514.57	1706.48	1698.2	1543.54	1760.68
C18_positive	MEDP1831	Ethyl acetoacetate	乙酰乙酸乙酯	Aldehyde,Ketones,Esters	醛、酮、酯类	Esters	酯类	C6H10O3	199.133	130.063	5.1014	M+Na+HCOOH	6.04897	1	0.6341	rp	141-97-9	8868	HMDB0031216	-	C03500	2.777	1.215	0.773	5.266	1.505	3.307	3.585	1.171	5.284	0.931	1.394	1.719	2.524	12.713	0.579	3.848	0.576	0.32	1.932	1.714	1.359	2.306	3.325	4.37	134.551	121.146	123.656	130.102
C18_positive	MW0113817	8,8-Dimethoxy-2,6-dimethyl-2-octanol	8,8-二甲氧基-2,6-二甲基-2-辛醇	Alcohol and amines	醇、胺类	Alcohols	醇类	C12H26O3	219.196	218.188	8.628	M+H	2.013	4	0.9521	rp	141-92-4	8863	HMDB0040219	-	-	32066.6	29344.6	30565.2	36665.2	33626.1	32976.8	32039	44651.4	40043	34745.7	34975.9	31369.9	34636.9	38178.8	29934.5	29106.8	32914.1	30094.5	37221.1	31538.7	37005.1	39148.1	37485.7	36913.1	33329.4	33260.6	33396.9	33031.8
C18_positive	MW0157979	trans-2,3-Epoxysuccinic acid	反式2,3-环氧琥珀酸酯	Organic acid and Its derivatives	有机酸及其衍生物	Organic acid and Its derivatives	有机酸及其衍生物	C4H4O5	133.013	132.006	4.4094	M+H	1.05651	3	0.9068	rp	141-36-6 | 17015-08-6	440044	-	-	C03548	9333.16	8051.45	10191.3	10187.5	7408.09	8142.54	8132.28	8258.88	9214.65	8272.54	9020.6	8430.06	11884.3	15899.8	8188.09	8284.6	9022.52	7675.2	8150.93	8169.68	9768.37	8799.3	12290.2	11577.3	19094.5	19468.7	19153	18526.2
C18_positive	MW0017211	Citronellyl butyrate	丁酸香茅酯	Aldehyde,Ketones,Esters	醛、酮、酯类	Esters	酯类	C14H26O2	213.185	226.193	7.5072	M+H-CH2	0.7005	4	0.7328	rp	141-16-2	8835	HMDB0037227	-	-	1.787	1.639	1.413	1.17	1.326	1.356	3.076	1.969	3.766	1.966	1.61	1.62	0.837	5.266	1.013	0.926	1.803	1.836	1.668	1.616	1.635	1.386	2.137	2.035	94.974	94.94	93.603	87.218
C18_positive	MW0054763	Menthone	薄荷酮	Aldehyde,Ketones,Esters	醛、酮、酯类	Ketones	酮类	C10H18O	201.148	154.136	4.2277	M+HCOO+2H	0.0981024	2	0.608	rp	14073-97-3	26447	HMDB0035162	-	C00843	0.75	0.839	0.53	1.048	0.769	0.353	0.457	0.348	0.906	0.371	0.611	0.436	0.868	19.285	0.048	0.069	0.764	0.612	0.023	0.069	0.813	0.871	1.202	1.029	91.205	96.969	90.514	91.73
C18_positive	MW0118710	2-Methyl-3-(2-methylpropyl)pyrazine	2-甲基-3-(2-甲基丙基)吡嗪	Heterocyclic compounds	杂环化合物	Heterocyclic compounds	杂环化合物	C9H14N2	265.113	150.116	0.717	M+H+CF3COOH	10.7537	4	0.542	rp	13925-06-9	26333	HMDB0036174	-	-	783.874	1113.05	459.968	1024.18	724.442	898.506	2334.06	2270.47	1238.33	1850.19	1667.51	2140.26	274.539	272.896	535.579	374.248	734.472	217.853	611.367	850.912	667.482	1418.47	443.652	1222.61	754.437	833.442	539.359	803.811
C18_positive	MW0152160	(R)-3-Amino-3-phenylpropanoic acid	(R)-3-氨基-3-苯基丙酸	Aldehyde,Ketones,Esters	醛、酮、酯类	Esters	酯类	C9H11NO2	130.065	165.079	2.5071	M+H-2H2O	0.7	3	0.9301	rp	13921-90-9	686703	-	-	C20487	4926.03	4807.52	9230.15	5429.47	9074.85	4963.9	10276.6	9486.59	10526.2	10403.1	14876.6	9850.76	4586.83	4890.03	3968.71	3940.95	4449.87	4441.63	7493.5	6358.69	11016.1	6686.7	6575.45	8546.4	11702.6	12522	12364.2	12000.7
C18_positive	MW0008587	Domiphen	多米芬	Benzene and substituted derivatives	苯及其衍生物	Phenolics	苯酚类	C22H40NO+	320.295	334.311	7.0353	M+H-CH3	7.475	4	0.8441	rp	13900-14-6	3149	-	-	-	11462	9836.09	8503.11	8827.14	10975.4	5615.36	48345.3	106296	112160	65896.7	239016	48348.5	91477.9	142024	105554	136348	172119	115273	60822.6	64972.7	54653.2	51728.9	41063.5	53419.3	31695	30871.9	28915.3	32154.7
C18_positive	MW0123208	Capsazepine	辣椒素	Heterocyclic compounds	杂环化合物	Heterocyclic compounds	杂环化合物	C19H21ClN2O2S	377.114	376.101	4.133	M+H	9.52154	2	0.8626	rp	138977-28-3	2733484	-	45065	-	30819.4	26455.8	27865.2	33125	30086.3	30433.5	30326.7	30981.9	33178.4	32731.8	34849.2	29522	31035.8	36338.4	26123.5	29794.4	30890.7	26426.3	39352.7	29167.9	31624.2	34042.2	31858.2	34200.1	28328.3	29014.6	28629.3	27504.9
C18_positive	MW0157161	Spheroidenone	球体酮	FA	脂肪酰类	Others	其他	C41H58O2	600.468	582.444	10.1881	M+NH4	16.8365	3	0.6202	rp	13836-70-9	5366412	-	-	C15903	388998	373710	372926	437448	412858	405556	421014	601444	516547	452993	444868	398066	442004	468827	363031	362923	405430	364719	451738	416151	460130	464151	482645	491736	427879	433013	427493	420873
C18_positive	MW0105445	Agomelatine	阿戈美拉汀	Alcohol and amines	醇、胺类	Amines	胺类	C15H17NO2	244.137	243.126	5.1356	M+H	6.18841	2	0.9114	rp	138112-76-2	82148	HMDB0015636	-	-	9920.01	8559.05	9253.58	11862.6	10578.4	10368.3	10890.6	9402.98	12581.7	10609.2	11088.6	10892.7	10728.4	12475.8	9341.82	9853.62	9414.26	8629.27	12655.1	9142.48	11632	12441.4	12451.1	10882.8	10289.2	10567.7	10313.2	10068.9
C18_positive	MW0053985	Hydroxyisocaproic acid	L-亮氨酸	Amino acid and Its metabolites	氨基酸及其代谢物	Amino acids	氨基酸	C6H12O3	97.0644	132.079	2.6894	M+H-2H2O	0.85	3	0.9248	rp	13748-90-8	83697	HMDB0000746	5714	-	1935.63	1806.78	2418.49	2678.81	2249.56	2135.16	2069.27	2198.91	2487.64	2056.05	2112.72	2027.15	2229.83	2844.64	1542.05	1559.65	1751.64	1633.17	2019.45	2600.98	2006.77	2049.2	2569.56	3075.79	3579.19	3550.29	3554.32	3535.87
C18_positive	MW0010071	Voriconazole	伏立康唑	Benzene and substituted derivatives	苯及其衍生物	Benzene and substituted derivatives	苯及其衍生物	C16H14F3N5O	372.103	349.115	9.6695	M+Na	3.59165	2	0.672	rp	137234-62-9	71616	HMDB0014720	-	C07622	47.763	40.771	89.86	100.053	57.484	101.906	132.266	95.395	66.726	48.899	44.162	49.021	104.132	610.703	27.855	50.367	40.299	47.444	78.551	106.422	40.799	49.121	219.98	184.804	4430.8	4407.64	4488.14	4349.6
C18_positive	MW0007503	Lidocaine	利多卡因	Benzene and substituted derivatives	苯及其衍生物	Benzene and substituted derivatives	苯及其衍生物	C14H22N2O	235.181	234.173	3.1757	M+H	2.54004	2	0.9919	rp	137-58-6	3676	HMDB0014426	-	C07073	644421	640766	692716	867046	709653	665523	774892	781902	885457	707046	629820	793353	924020	911799	596926	740627	741736	594559	808526	661398	781917	906286	948860	903091	818502	812693	800934	783495
C18_positive	MEDTP02857	Thiram	福美双	Others	其他	Others	其他	C6H12N2S4	240.987	239.988	12.2366	M+H	18.8828	2	0.5666	rp	137-26-8	5455	-	-	-	2380.42	3086.4	2685.07	3111.78	2716.64	1998.1	3688.87	3168.06	3842.38	3599.61	3885.24	3638.73	3767.85	2761.16	2389.16	2473.81	2495.2	2399.21	3350.56	3638.47	3300.13	3543.21	3281.27	3650.12	3427.94	3418.62	3593.82	3247.34
C18_positive	MW0006009	Alprenolol	阿普洛尔	Benzene and substituted derivatives	苯及其衍生物	Phenolics	苯酚类	C15H23NO2	250.178	249.173	6.6004	M+H	4.39861	2	0.9373	rp	13655-52-2	2119	HMDB0015004	-	-	24842.9	24708.7	25577.6	30110.7	28205.4	27755.8	18622.2	27804	26026.7	22051.1	26019.3	18878.4	37401.1	40367.4	32315.2	30110.7	33879.5	31232.6	41889.8	30499.7	33009.5	43499.5	35878.1	42247.4	28743.2	28603.6	28223.3	28449.3
C18_positive	MW0124145	Fluquinconazole	氟喹康唑	Heterocyclic compounds	杂环化合物	Heterocyclic compounds	杂环化合物	C16H8Cl2FN5O	188.513	375.009	5.6991	M+2H	0.016	4	0.7496	rp	136426-54-5	86417	-	-	-	18699	17134.8	16144.5	19896	15015.2	15686.3	15116.2	15787.1	19450.5	16155	14737.7	6622.06	19541.4	20109.3	16963.4	17256.9	18832.6	15112.2	18719.3	15643.4	17381.2	18125.2	18118.1	19707	17432	18618.8	17885	18267.7
C18_positive	MW0007317	Hexylresorcinol	己基间苯二酚	Benzene and substituted derivatives	苯及其衍生物	Phenolics	苯酚类	C12H18O2	195.138	194.131	4.8449	M+H	0.394126	2	0.705	rp	136-77-6	3610	HMDB0032567	-	-	0.073	0.015	0.17	0.233	0.043	0.15	0.047	0.289	0.336	0.254	0.052	0.042	0.141	3.524	0.027	0.131	0.254	0.136	0.011	0.089	0.127	0.265	0.184	0.185	42.652	42.472	43.088	43.098
C18_positive	MW0126371	Quinalphos	喹啉磷	Heterocyclic compounds	杂环化合物	Heterocyclic compounds	杂环化合物	C12H15N2O3PS	281.051	298.054	11.7568	M+H-H2O	1.02587	2	0.7302	rp	13593-03-8	26124	-	68785	-	649.46	596.85	637.705	605.691	856.926	437.604	773.645	733.661	539.672	769.929	405.342	709.397	579.776	1464.52	663.177	662.544	814.513	666.18	808.664	881.545	343.294	911.814	810.192	1322.99	5750.65	5624.96	5564.36	5720.55
C18_positive	MW0126145	Pindolol	吲哚洛尔	Heterocyclic compounds	杂环化合物	Heterocyclic compounds	杂环化合物	C14H20N2O2	287.118	248.153	4.133	M+K	8.805	4	0.5719	rp	13523-86-9	4828	HMDB0015095	-	C07445	2708.46	2196.38	2537.33	2891.25	2925.24	3030.65	3059.93	3059.71	2437.91	2720.13	2954.66	2487.16	3074.44	4018.79	2371.21	2561.02	2464.68	2408.47	2791.48	2906.63	2405.54	3047.23	2730.47	2662.58	2640.32	2643.91	2691.18	2595.82
C18_positive	MW0150667	Guazatine	瓜扎汀	Alcohol and amines	醇、胺类	Polyamines	多胺	C18H41N7	356.353	355.342	6.6862	M+H	11.5144	3	0.736	rp	13516-27-3 | 108173-90-6	3526	-	-	-	511.037	523.923	771.109	387.524	518.01	688.712	24331.6	30310.1	24359.3	28709.5	28281.3	27032.2	415.54	459.223	731.883	1007.28	765.712	1321.17	6472.89	10485	6214.92	4914.09	8989.08	5407.35	6591.79	7025.66	6838.17	7054.01
C18_positive	MW0103605	Lamivudine	拉米夫定	Nucleotide and Its metabolites	核苷酸及其代谢物	Nucleotide and Its metabolites	核苷酸及其代谢物	C8H11N3O3S	215.037	229.052	5.6991	M+H-CH3	0.28	4	0.743	rp	134678-17-4	60825	HMDB0014847	-	C07065	3451.1	2713.65	3178.91	3589.41	3072.14	3032.87	2804.93	2611.55	3563.57	2821.95	3023.23	3032.38	3578.37	3725.5	3088.21	3056.67	2997.95	2889.16	3367.18	3091.87	3485.85	3523.91	3623.91	3580.53	3273.97	3326.98	3167.9	3228.48
C18_positive	MW0169725	Pyrazophos	吡唑磷	Heterocyclic compounds	杂环化合物	Heterocyclic compounds	杂环化合物	C14H20N3O5PS	374.1	373.086	9.6829	M+H	21.1291	2	0.6187	rp	13457-18-6	26033	-	-	C18761	10.193	1.557	2.28	4.265	9.445	4.008	9.551	2.453	2.849	8.413	1.847	2.917	0.045	35.441	11.368	0.933	8.072	0.663	1.267	0.167	0.917	0.632	6.647	6.799	351.267	349.333	357.261	342.664
C18_positive	MEDN0460	N8-Acetylspermidine	N8-乙酰亚精胺	Amino acid and Its metabolites	氨基酸及其代谢物	Amino acid derivatives	氨基酸衍生物	C9H21N3O	188.176	187.168	0.5805	M+H	0.305393	1	0.6537	rp	13431-24-8	123689	HMDB0002189	6535	C01029	18.983	65.485	815.457	11.519	69.558	2.813	433.232	442.574	464.82	427.029	522.204	404.25	8.506	23.875	26.171	26.824	11.398	2.724	19.811	7.46	16.886	23.122	5.653	36.28	1705.19	1716.39	1702.35	1695.1
C18_positive	MW0149012	Estradiol 3-phosphate	3-磷酸雌二醇	Organic acid and Its derivatives	有机酸及其衍生物	Phosphoric acids	磷酸类化合物	C18H25O5P	391.11	352.144	9.6829	M+K	0.0975	4	0.9976	rp	13425-82-6	11545701	-	-	-	3.575	0.538	3.57	1.056	1.73	3.072	2.376	0.532	3.902	2.864	2.198	2.037	2.202	5.986	0.473	1.695	2.52	3.022	0.906	2.734	2.489	3.188	2.4	3.145	149.321	142.533	145.225	144.242
C18_positive	MW0053803	Guaiol acetate	醋酸愈创木酚	Aldehyde,Ketones,Esters	醛、酮、酯类	Esters	酯类	C17H28O2	217.107	264.209	7.227	2M+2Na+2K-H	2.6745	4	0.6874	rp	134-28-1	61079	HMDB0037218	-	-	10903.3	7726.36	6126.29	6992.66	11338.2	21885.2	8946.47	7185.73	11036.1	10587.4	8087.94	6970.77	8064.36	8571.52	5929.34	7654.63	7451.87	7307.41	8386.89	9319.18	7299.98	8498.6	8979.96	9542.04	7501.05	6261.67	7174.81	7564.59
C18_positive	MW0001756	2-(2,4-Dichlorophenoxy)-n-hydroxyacetamide	2-(2,4-二氯苯氧基)-n-羟基乙酰胺	Benzene and substituted derivatives	苯及其衍生物	Benzene and substituted derivatives	苯及其衍生物	C8H7Cl2NO3	235.992	234.98	1.334	M+H	11.7535	4	0.7778	rp	13359-22-3	239786	-	-	-	30392.6	28770.2	27447.6	33452.8	29436.3	31640.2	27208.9	22834.9	31848.9	30935.6	28140.5	27767.1	32774.3	39890.3	27373	27914.2	27972.9	25101	29879.8	22955.6	32521.2	26260.3	28075.5	28800.2	26055.5	26011.2	26820.6	26038.4
C18_positive	MW0124412	3-Indolebutyric acid	吲哚-3-丁酸	Organic acid and Its derivatives	有机酸及其衍生物	Organic acid and Its derivatives	有机酸及其衍生物	C12H13NO2	204.099	203.095	5.7298	M+H	7.036	2	0.7455	rp	133-32-4	8617	HMDB0002096	6485	C11284	58243.1	52225.5	56773.7	66725.3	57766.4	61737.5	59763.4	60321.3	69856.5	59196.6	59560.2	59242.6	68770	73542.4	56330.1	55406	60826.2	51522.9	68562.8	57520.1	62930.7	69523.9	70834.4	70637.1	58256.2	60314.3	59005.1	59143.2
C18_positive	MW0012928	PC(O-16:0/20:5(5Z,8Z,11Z,14Z,17Z))	PC(O-16:0/20:5(5Z,8Z,11Z,14Z,17Z))	GP	甘油磷脂类	PC	磷脂酰胆碱	C44H80NO7P	748.57	765.567	10.6724	M+H-H2O	7.10501	2	0.7021	rp	132196-28-2	10485310	HMDB0039528	-	-	70884.5	6935.26	73176.6	11245.2	67214.9	78726.2	63791.3	90907.4	98309	59211	54929.5	45479.7	33581.9	101456	50758.7	77690.6	58617.4	39194.6	84097.5	78297	80662.2	87798.6	93793.8	90383.2	61195.9	61422.6	56569	62748.7
C18_positive	MW0111271	4-(2-Pyridylazo)-N,N-dimethylaniline	吡啶-2-偶氮对二甲基苯胺	Heterocyclic compounds	杂环化合物	Pyridine and pyridine derivatives	吡啶及其衍生物	C13H14N4	227.126	226.122	0.6265	M+H	9.1241	2	0.8969	rp	13103-75-8	81528	-	96366	-	162901	150643	152917	107807	158345	153482	132837	153260	210715	134627	160190	62538	152717	188959	139943	144307	175464	142273	175648	149309	145090	200015	149809	158957	159237	162319	162853	164742
C18_positive	MW0002769	2-Bromo-4-chlorobenzamide	2-溴-4-氯苯甲酰胺	Benzene and substituted derivatives	苯及其衍生物	Benzene and substituted derivatives	苯及其衍生物	C7H5BrClNO	113.95	234.922	12.6635	M+3Na+K-H	7.65375	4	0.591	rp	131002-01-2	15111014	-	-	-	31170.7	27054.3	31664.7	32051.2	37449.6	28946	30777.3	31737.8	8317.97	41229.9	50083.3	24835.4	27912.2	35628.5	37338.9	24585.1	33332.9	40181.2	32500.2	28081.4	33936.5	31996.9	13395	54728.7	34302.1	34090	33141.9	34518.4
C18_positive	MW0008802	N-Acetyl-Neuraminic Acid	N-乙酰神经氨酸	Amino acid and Its metabolites	氨基酸及其代谢物	Amino acid derivatives	氨基酸衍生物	C11H19NO9	340.082	309.106	1.1677	2M+Na+K	0.04675	4	0.7488	rp	131-48-6 | 489-46-3	439197	HMDB0000230	-	C00270	711.833	929.049	967.762	907.575	949.154	343.434	2866.22	3600.02	2731	3144.89	2801.19	2104.07	457.916	642.037	649.893	276.13	338.196	602.085	6560.73	4777.31	5948.2	5044.15	6580.77	7179.18	1154.6	1184.74	1193.9	1233.62
C18_positive	MW0010438	(+)-Aschantin	-	Lig-s and Coumarins	木脂素和香豆素	Lig-s	木脂素	C22H24O7	445.12	400.152	10.733	M-H+2Na	9.37691	2	0.5485	rp	13060-15-6	122643	-	-	C17845	373.261	577.815	601.772	738.303	368.062	735.505	821.572	914.728	470.16	266.27	271.687	277.179	248.279	1943.03	2717.34	156.059	305.672	257.013	508.02	424.814	2084.4	389.693	1135.22	881.122	11048.2	11029.1	11041.2	10946.5
C18_positive	MW0055234	N-acetylsphinganine	N-乙酰鞘氨醇	SL	鞘脂类	SPH	鞘氨醇	C20H41NO3	326.306	343.309	6.0815	M+H-H2O	2.93191	2	0.926	rp	13031-64-6 | 26561-61-5	6610273	-	43402	-	187841	187058	186919	192589	173600	159345	1.28881e+06	1.34203e+06	1.35475e+06	1.38254e+06	1.28306e+06	1.33743e+06	192676	242589	161250	127893	171534	114223	228594	94582.6	367921	407672	949508	409488	193876	194871	193676	194137
C18_positive	MEDN1137	Flavin Single Nucleotide(FMN)	黄素单核苷酸(FMN)	Nucleotide and Its metabolites	核苷酸及其代谢物	Nucleotide and Its metabolites	核苷酸及其代谢物	C17H21N4O9P	439.102	456.105	3.0086	M+H-H2O	0.506104	1	0.7575	rp	130-40-5	643976	HMDB0001520	-	C00061	3714.8	3266.86	4322.84	3461.53	3095.95	2947.08	2608.32	3404.34	2466.78	3487.55	2666.87	3551.04	2332.04	2635.71	3129.78	2815.57	2867.95	4376.62	2945.41	2483.59	2320.07	2516.56	2629.3	2784.7	7088.09	6745.18	7259.29	7067.15
C18_positive	MW0168779	Aripiprazole	阿立哌唑	Heterocyclic compounds	杂环化合物	Heterocyclic compounds	杂环化合物	C23H27Cl2N3O2	150.058	447.148	0.8533	M+3H	4.39964	4	0.6513	rp	129722-12-9	60795	HMDB0005042	-	C12564	69.204	88.245	180.516	112.849	73.687	136.358	388.639	367.264	223.547	386.813	410.091	276.055	43.872	60.532	41.219	64.777	4.795	88.337	216.597	91.663	152.79	147.408	124.279	120.442	637.247	636.625	669.067	642.067
C18_positive	MW0140248	(1Z,13S,14R,15E)-1-Anthracen-9-yl-14-hydroxy-13-(hydroxymethyl)nonacosa-1,15-dien-12-one	(1Z,13S,14R,15E)-1-Anthracen-9-yl-14-hydroxy-13-(hydroxymethyl)nonacosa-1,15-dien-12-one	Others	其他	Others	其他	C44H65NO3	673.529	655.496	11.3388	M+NH4	2.3421	2	0.5681	rp	1263052-40-9	125462772	-	96549	-	203222	196550	115548	131242	127072	126406	121388	171043	152469	137344	130990	127578	125719	140011	103201	111710	118477	101913	132849	120960	256016	147034	136185	152398	130659	130662	130697	129258
C18_positive	MW0153988	Muscapurpurin	麝红紫素	Heterocyclic compounds	杂环化合物	Heterocyclic compounds	杂环化合物	C18H14N2O10	258.983	418.065	1.334	M+Na+2K-H	9.19674	4	0.5657	rp	12624-19-0	11953911	-	-	C08563	3105.91	2910.69	2999.64	3280.18	3637.06	3686.45	2888.03	3497.69	4661.12	3322.89	3291.15	3040.64	2992.92	3530.62	3182.3	2909.11	3659.02	3320.84	3537.58	3200.15	3396.59	2935.64	2580.52	2693.56	2590.48	2590.65	2576.34	2489.22
C18_positive	MW0056747	Palmitoyl Serinol	棕榈酰丝氨醇	FA	脂肪酰类	Others	其他	C19H39NO3	330.301	329.293	4.011	M+H	0.568135	2	0.9233	rp	126127-31-9	9862307	HMDB0013654	-	-	40.837	51101.8	48.767	94407	36.444	9.693	207.284	116.087	436.625	514.28	130.391	223.52	40386.7	39902.6	38689.7	39363.2	37764.7	40384.2	85571.3	43010.5	45325.4	63679.5	44249.1	40121.7	38878	40043.9	39104.2	38461.3
C18_positive	MW0054360	Linalyl benzoate	苯甲酸芳樟酯	Benzene and substituted derivatives	苯及其衍生物	Benzene and substituted derivatives	苯及其衍生物	C17H22O2	130.086	258.162	8.7969	M+2H	9.95	4	0.554	rp	126-64-7	31353	HMDB0030431	-	-	1181.74	1439.78	423.135	1138.83	1192.57	1396.72	1365.79	2169.03	119.469	1405.76	1322.9	1274.02	1119.6	965.744	1160.88	541.284	992.766	982.702	1099.91	563.211	1180.32	1432.35	1381.52	1523.87	982.846	1092.25	1081.18	1147.96
C18_positive	MW0007673	Methyl 2,4-difluoro-5-nitrobenzoate	2,4-二氟-5-硝基苯甲酸甲酯	Benzene and substituted derivatives	苯及其衍生物	Benzene and substituted derivatives	苯及其衍生物	C8H5F2NO4	200.013	217.019	2.0039	M+H-H2O	1.66025	4	0.7102	rp	125568-71-0	11447263	-	-	-	510.105	541.963	718.732	610.715	362.922	399.946	539.042	349.627	233.035	365.07	421.839	538.781	528.661	1056.08	221.326	282.721	406.71	396.517	465.581	262.963	425.828	411.846	690.987	615.797	1801.52	1823.92	1811.94	1782.64
C18_positive	MW0114007	Bispyribac	双嘧啶	Heterocyclic compounds	杂环化合物	Heterocyclic compounds	杂环化合物	C19H18N4O8	499.104	430.113	4.5004	M+Na+HCOOH	6.58614	2	0.6935	rp	125401-75-4	443031	-	68684	-	5937.66	4927.16	6773.04	6774.68	5568.73	5403.35	6435.9	7868.04	7723.24	6611.17	6843.93	6275.59	5746.02	7065.29	4587.04	5277	6544.18	4259.81	6892.42	5153.16	6812.16	6264.96	7035.23	7385.74	7856.76	8438.12	6811.79	7538.26
C18_positive	MW0013961	3beta,5alpha,6beta-Trihydroxycholestane	3beta,5alpha,6beta-三羟基胆甾烷	Alcohol and amines	醇、胺类	Alcohols	醇类	C27H48O3	438.379	420.36	10.899	M+H+NH3	36.5072	4	0.5806	rp	1253-84-5	91498	HMDB0003990	-	C05425	385582	382338	373255	439159	415278	410718	510948	586967	559204	493310	474815	432834	428196	476647	364856	370867	408013	338266	459532	461187	480810	503341	568321	535782	464152	452967	452275	448277
C18_positive	FDATN00356	Detrol	Tolterodine tartrate	Others	其他	Medicine	药物	C26H37NO7	330.202	475.257	2.3401	M+H-C6H10O4	4.20255	4	0.6552	rp	124937-52-6 | 209747-05-7	443878	-	-	-	14.805	12.174	5.33	24.242	1.623	3.586	55.911	54.671	22.923	11.769	17.434	57.929	14.323	12.729	38.365	14.683	11.568	32.512	4.905	18.034	19.348	33.516	38.2	16.3	246.58	254.892	248.407	252.07
C18_positive	MW0159250	Valacyclovir hydrochloride	盐酸伐昔洛韦	Alcohol and amines	醇、胺类	Amines	胺类	C13H21ClN6O4	159.076	360.131	1.1603	M+2H-CO2	0.7025	4	0.7327	rp	124832-27-5 | 136489-37-7	135398741	HMDB0014716	-	C07184	16.939	29.58	3.872	45.078	9.074	9.092	205.162	281	232.707	297.633	329.866	204.216	78.762	10.05	34.584	22.371	41.289	6.162	212.922	191.601	193.165	202.059	152.043	135.063	169.437	166.825	176.551	178.997
C18_positive	MW0160363	Pyridoxal 5'-phosphate(2-)	吡哆醛 5'-磷酸 (2-)	Others	其他	Others	其他	C8H8NO6P-2	231.988	245.009	0.2779	M+H-CH2	2.31025	4	0.6955	rp	124051-94-1	644168	-	-	-	17967.7	17524.4	17681.2	5474.87	18445.3	18495.2	22202.4	2881.16	19830.5	3480.03	20788	18906	21069.7	4329.39	18874.6	16471	20592.8	19703	24345.6	20877.4	15657.7	16738.8	26298.1	21258.5	15060.5	14647.3	16009.3	11609.7
C18_positive	MEDN0682	Octadecanamide	硬脂酰胺	Alcohol and amines	醇、胺类	Amines	胺类	C18H37NO	284.295	283.288	6.631	M+H	0.269902	1	0.9097	rp	124-26-5	31292	HMDB0034146	-	C13846	1635.61	1418.54	1554.63	1430.48	1379.64	1511.07	9103.6	9231.95	9454.66	9843.64	9797.82	8968.56	2.856	2.554	3.453	0.927	377.028	1.591	4.489	1.375	2.69	158.419	2.501	0.862	1402.33	1425.52	1419.53	1441.06
C18_positive	MW0108975	Octanal	辛醛	Aldehyde,Ketones,Esters	醛、酮、酯类	Aldehydes	醛类	C8H16O	111.116	128.12	8.3229	M+H-H2O	1.48725	2	0.8874	rp	124-13-0	454	HMDB0001140	6033	C01545	540.769	476.366	415.222	501.433	398.875	434.756	491.107	403.226	361.29	522.526	410.985	584.012	426.432	764.231	326.036	357.116	450.273	439.094	458.664	462.658	445.763	568.445	605.881	632.737	1976.45	1984.92	1978.3	2042.62
C18_positive	MW0053741	Glyceryl monostearate	单硬脂酸甘油酯	GL	甘油脂类	MG	单甘油酯	C21H42O4	341.305	358.308	12.1528	M+H-H2O	2.06991	2	0.9451	rp	123-94-4 | 31566-31-1 | 22610-63-5 | 83138-62-9 | 85666-92-8 | 342394-34-7	24699	-	-	-	58348.9	59169.7	51913.4	59026.1	59101.9	54820.6	57073.4	75268.6	82996.5	69888.7	70538.9	63095.1	33043.4	56072.2	46305.8	46175.6	55359.6	56120.4	46801.6	73233.4	45182	62516.7	48718.8	57594.4	44278.3	42188.5	44157	44110.8
C18_positive	MW0111288	Sphingosine	鞘氨醇	SL	鞘脂类	SM	鞘磷脂	C18H37NO2	282.28	299.282	6.1653	M+H-H2O	1.30119	1	0.795	rp	123-78-4	5280335	HMDB0000252	-	C00319	537.811	500.737	502.665	537.555	513.176	494.651	2759.38	3156.72	2815.82	3022.63	2858.66	3004.71	0.527	0.054	0.25	0.281	1.19	0.48	0.278	0.559	0.57	0.582	0.564	0.343	454.884	461.917	462.585	466.113
C18_positive	MW0114636	Isopentanol	3-甲基丁醇	Alcohol and amines	醇、胺类	Alcohols	醇类	C5H12O	199.169	88.0888	8.0219	2M+Na	4.32152	2	0.6929	rp	123-51-3	31260	HMDB0006007	-	C07328	3483.94	3863.37	3066.19	3072.95	2679.8	3336.88	2581.53	3495.3	4174.02	3058.6	3661.43	2349.36	3372.93	4356.48	1919.3	2939.48	3166.31	2575.66	2951.44	2510.07	2878.82	4071.92	3336.91	2689.56	4648.06	5914.64	6474.59	5864.49
C18_positive	MW0155517	2H-Pyran-2-one, 6-(3-(2-aminoethyl)-10-cyclohexyl-3,6-dihydroxy-4-(phosphonooxy)-1,7,9-decatrienyl)-5-ethyl-5,6-dihydro-	2H-吡喃-2-酮，6-(3-(2-氨基乙基)-10-环己基-3,6-二羟基-4-(膦酰氧基)-1,7,9-癸三烯基)-5-乙基-5， 6-二氢-	Heterocyclic compounds	杂环化合物	Heterocyclic compounds	杂环化合物	C25H40NO8P	514.257	513.249	12.2366	M+H	2.24921	4	0.6968	rp	122856-26-2	6439129	-	-	-	722.359	489.654	583.805	743	1198.11	510.584	1549.71	747.479	1608.73	1980.86	199.158	988.892	419.408	410.892	285.13	938.292	600.451	506.59	364.982	693.968	35.912	1125.41	1035.29	435.231	850.473	865.69	788.914	858.343
C18_positive	MW0169457	Mefexamide	甲非沙胺	Benzene and substituted derivatives	苯及其衍生物	Benzene and substituted derivatives	苯及其衍生物	C15H24N2O3	303.175	280.179	7.4922	M+Na	0.76825	4	0.7312	rp	1227-61-8	4045	-	43468	-	4.343	6.154	8.519	16.718	4.439	44.874	87.257	106.31	140.113	123.801	7.967	76.028	5.649	1.181	4.524	6.561	14.966	11.615	114.216	231.934	3.894	141.566	250.763	180.073	577.608	522.063	505.26	508.954
C18_positive	MW0152141	Latanoprost(free acid)-d4	-	Organic acid and Its derivatives	有机酸及其衍生物	Organic acid and Its derivatives	有机酸及其衍生物	C23H34O5	395.277	390.241	9.4406	M+H	10.4791	2	0.7282	rp	1224443-47-3	131668296	-	96570	-	19834.7	14953.7	17976.6	15956.2	15681	17273.5	30991.7	34915.8	33347.4	28787.8	27206.3	20706	17023.7	20093.2	16840.1	19279.9	23163	16254.5	21444.6	16225.2	29308.3	28445.3	28258.4	28684.6	15803.2	15937.9	15503	15502.3
C18_positive	MW0008588	N,N-dimethylsphingosine	N，N-二甲基-4-烯氨酸	SL	鞘脂类	SPH	鞘氨醇	C20H41NO2	310.311	327.314	6.4931	M+H-H2O	1.12873	2	0.9464	rp	122314-67-4	5282309	HMDB0013645	-	C13914	57889.8	54288	63191.5	54351.1	52486.5	54582.4	151998	157901	163174	164140	165466	160320	7163.65	17993.6	21647.7	19943.6	24565.7	14322.4	14329.4	20381.2	2373.61	8397.11	3249.2	3168.47	35184.8	35440.9	35284.6	35028
C18_positive	MW0126023	2-Hept-6-enyl-3-penta-2,4-diynyloxirane	2-Hept-6-enyl-3-penta-2,4-diynyloxirane	Heterocyclic compounds	杂环化合物	Heterocyclic compounds	杂环化合物	C14H18O	203.139	202.136	1.3037	M+H	4.41325	4	0.651	rp	122122-03-6	180093	HMDB0039356	-	-	0.568	1.153	1.261	0.879	1.521	1.277	2.554	1.206	0.844	3.665	1.859	1.191	0.521	0.68	4.577	1.836	0.67	3.43	2.985	3.576	1.319	0.726	2.197	3.185	113.252	111.348	112.403	110.24
C18_positive	MW0005943	Phenyl acetate	乙酸苯酯	Benzene and substituted derivatives	苯及其衍生物	Benzene and substituted derivatives	苯及其衍生物	C8H8O2	273.118	136.052	4.6521	2M+H	13.85	3	0.7432	rp	122-79-2	31229	HMDB0040733	-	C15583	991.047	899.805	1063.53	416.553	614.597	105.076	6881.45	6690.33	9362.34	7947.87	6293.61	6484.15	305.907	957.44	943.317	9768.98	1463.73	1275.94	8968.3	16155.2	4494.09	6993.98	8124.02	9145.17	16487.1	16778.3	17035.5	16765.3
C18_positive	MW0169839	Simazine	西马津	Heterocyclic compounds	杂环化合物	Heterocyclic compounds	杂环化合物	C7H12ClN5	202.09	201.078	3.1607	M+H	11.5404	2	0.8103	rp	122-34-9 | 39291-64-0	5216	-	44581	-	7173.73	7666.04	6012.05	4779.78	7530.82	3069.49	18796	17519.9	13437.1	13699.4	13123.5	15512.9	2102.31	4371.8	5456.9	5344.56	7198.75	8613.06	13417.3	16008.4	11935.7	11989.6	11994.8	11441.1	14582	14421.7	14924.8	14145.5
C18_positive	MW0111638	Primaperone	普里马佩隆	Aldehyde,Ketones,Esters	醛、酮、酯类	Ketones	酮类	C15H20FNO	267.196	249.153	5.1722	M+H+NH3	10.2685	4	0.5492	rp	1219-35-8	14641	-	-	-	0.624	0.191	0.368	0.269	0.48	0.851	0.25	0.339	0.407	0.672	0.216	0.493	0.21	3.094	0.09	0.252	0.678	0.121	0.143	0.384	0.096	0.564	1.505	0.296	43.832	43.991	45.498	43.504
C18_positive	MW0003577	3,4,5-Trifluorobenzoic acid	3,4,5-三氟苯甲酸	Benzene and substituted derivatives	苯及其衍生物	Benzene and substituted derivatives	苯及其衍生物	C7H3F3O2	126.967	176.008	12.6938	M+2K	1.215	4	0.7205	rp	121602-93-5 | 255875-61-7	853154	-	-	-	13242.3	6380.49	8914.36	5990.05	6130.19	6457.95	8763.82	5696.06	8278.85	8684.38	11756.1	4775.13	7127.47	9715.85	7144.74	11438.5	6800.17	5273.22	6516.55	4319.8	7197.1	6549.4	8191.09	10692.7	7791.07	7974.68	7832.97	7775.04
C18_positive	MW0000929	2-Isopropoxy-5-trifluoromethyl-phenylamine	2-异丙氧基-5-三氟甲基苯胺	Benzene and substituted derivatives	苯及其衍生物	Benzene and substituted derivatives	苯及其衍生物	C10H12F3NO	174.088	219.087	5.7298	M+H-HCOOH	0.24675	4	0.7439	rp	121307-23-1	2894792	-	-	-	2084.21	1850.22	1887.38	2266.8	1905.99	2081.16	1972.41	2675.46	2471.55	2190.82	2082.91	2096.97	2511.74	2526.59	1992.67	2128.3	2293.55	2297.16	2576.16	1879.27	2220.61	2717.81	2930.66	2456.34	2182.57	2174.74	2203.59	2160.78
C18_positive	MEDP0212	N-Acetylserotonin	N-乙酰基五羟色胺	Tryptamines,Cholines,Pigments	色胺、胆碱、色素	Tryptamines	色胺	C12H14N2O2	236.146	218.106	4.5144	M+NH4	16.7173	1	0.6128	rp	1210-83-9	903	HMDB0001238	366	C00978	22968.1	19948.3	21916.1	24301.3	21775.1	22352.1	23106.4	22890.5	27009.3	23054.3	23768.9	22689.6	24561	28802.1	20849.1	21320.2	22378.2	18223.9	25266.8	22555	24484.9	25218.1	25918.7	26642	21909.5	21909.9	21849	21650.6
C18_positive	MW0111163	N,N-Dimethylaniline	N,N-二甲基苯胺	Benzene and substituted derivatives	苯及其衍生物	Benzene and substituted derivatives	苯及其衍生物	C8H11N	281.139	121.089	7.7532	2M+K	6.51208	2	0.7563	rp	121-69-7	949	HMDB0001020	5949	C02846	49568.1	81094.7	84323.4	57338.9	65387.8	38644.3	31934.3	50489.5	38756.9	39128.6	54547	35784.1	39251.1	55067.5	39581.1	39701.2	33470	40325.6	43038.9	42369.6	56013.8	48666.9	70987.5	46525.8	53920.1	53905.9	53863.1	53492.8
C18_positive	MW0111334	Triethylamine	三乙胺	Others	其他	Hydrocarbon derivatives	烃衍生物	C6H15N	102.127	101.12	0.3713	M+H	0.867325	1	0.7381	rp	121-44-8	8471	HMDB0032539	-	C14691	78847.9	64546.4	85644.1	73877.4	77434.4	84916.1	84220	11942.2	71910.8	74450.1	85915.1	62333.3	91131.9	74787.9	76938.3	62308.7	111165	76490.1	119539	97906.1	60358.7	88492.4	66227.7	72141.8	73400.9	77385	75138	73627.9
C18_positive	MW0108274	Methyl hippurate	2-苯甲酰胺基乙酸甲酯	Aldehyde,Ketones,Esters	醛、酮、酯类	Esters	酯类	C10H11NO3	158.06	193.074	2.5071	M+H-2H2O	0.207629	2	0.687	rp	1205-08-9	14566	HMDB0000859	5822	-	1676.49	1232.58	766.495	1628.73	1392.47	1265.28	4322.01	4081.12	4060.99	3973.89	3976.64	3727.63	798.876	1085.24	982.673	711.838	1098.85	1499.64	2614.22	2319.34	1793.76	2175.22	1998.08	2444.37	3656.16	3663.3	3723.53	3651.47
C18_positive	MW0103120	Vitamin K	叶绿醌（维生素 K1）	CoEnzyme and vitamins	辅酶和维生素	CoEnzyme and vitamins	辅酶和维生素	C31H46O2	468.39	450.35	10.2791	M+NH4	12.521	2	0.7103	rp	12001-79-5 | 81818-54-4 | 10485-69-5 | 27696-10-2	5280483	HMDB0015157	-	C02059	345512	338477	338947	402640	367366	365774	380377	532092	460240	416568	400146	361730	392971	428432	326932	334222	366669	323261	400128	363820	410258	431314	428335	457254	373386	379368	374443	369552
C18_positive	MW0054292	Lauroyl diethanolamide	月桂酸二乙醇酰胺	FA	脂肪酰类	Others	其他	C16H33NO3	288.254	287.246	5.8217	M+H	0.122209	2	0.8436	rp	120-40-1	8430	HMDB0032358	-	-	3658.02	2597.07	3070.94	3573.23	3272.54	4192.01	3223.97	5424.54	6092.52	3226.73	3325.25	3491.16	4928	4777.72	5019.47	3841.81	4521.51	2556.35	5686.91	3396.55	5770.24	5237.63	5577.06	5505	4936.72	5026.4	5006.74	4997.2
C18_positive	MW0004646	N-Sulfanilyl-3,4-xylamide	N-Sulfaniyl-3,4-xylamide	Benzene and substituted derivatives	苯及其衍生物	Benzene and substituted derivatives	苯及其衍生物	C15H16N2O3S	305.098	304.088	1.2432	M+H	0.408	4	0.7399	rp	120-34-3	67118	-	-	-	95.819	63.404	1017.36	37.31	21.085	65.768	2138.93	2078.3	1496.66	2050.09	2425.88	2045.1	12.281	54.965	602.954	14.543	9.952	12.476	1955.75	1430.69	1974.62	1678.58	1003.32	1537.18	2896.1	2927.44	2954.53	2847.02
C18_positive	MW0011117	(2beta,3alpha,5alpha,16beta,17beta)-17-Acetoxy-3-hydroxy-2-(4-morpholinyl)-16-(1-pyrrolidinyl)androstane	-	Hormones and hormone related compounds	激素及激素相关物质	Hormones and hormone related compounds	激素及激素相关物质	C29H48N2O4	527.32	488.361	8.7355	M+K	3.25946	4	0.6748	rp	119302-24-8	16064933	-	-	-	513.744	439.994	558.352	190.015	364.186	413.142	355.856	943.994	618.154	454.107	618.619	474.718	881.74	523.141	406.495	380.665	503.968	707.276	1059.07	946.535	285.443	546.549	410.62	583.055	575.407	634.261	543.504	272.32
C18_positive	MW0013819	3,4-Dihydrocoumarin	二氢香豆素	Aldehyde,Ketones,Esters	醛、酮、酯类	Ketones	酮类	C9H8O2	121.028	148.052	8.0744	M+H-C2H4	1.07375	4	0.7239	rp	119-84-6	660	HMDB0036626	-	C02274	3653.04	2839.61	4032.99	4391.06	4426.99	3694.67	3485.13	3952.92	3651.29	2162.47	1759.59	1864.4	4389.91	4984.74	3992.28	3996.03	3267.16	2589.29	2685.12	2740.29	2575.85	1729.24	3103.11	4303.24	1625.37	1842.25	1720.61	1684.91
C18_positive	MW0002093	2,2'-Dithiodibenzoic acid	2,2'-二硫代二苯甲酸	Benzene and substituted derivatives	苯及其衍生物	Benzene and substituted derivatives	苯及其衍生物	C14H10O4S2	307.013	306.002	0.5652	M+H	4.87425	4	0.6419	rp	119-80-2	8409	-	-	-	212.185	251.14	283.658	303.784	189.123	29.108	149.263	419.097	640.554	411.407	602.641	280.721	273.445	230.445	387.768	335.27	392.188	1280.1	1315.23	1457.1	894.444	1113.45	968.939	556.223	694.439	839.932	803.355	805.115
C18_positive	MEDN1753	2,2-Dimethylpentanoic acid	2,2-二甲基戊酸	Organic acid and Its derivatives	有机酸及其衍生物	Organic acid and Its derivatives	有机酸及其衍生物	C7H14O2	113.096	130.099	8.4594	M+H-H2O	1.06191	2	0.7932	rp	1185-39-3	14455	-	4485	-	9801.23	8951.09	11315.5	12029	9190.82	9180.74	9457.81	10699.8	12508.3	10954.5	10085.6	10856	10277.5	12419.6	9712.22	8842.75	9538.07	8767.8	9994.4	9865.83	10916.8	10560.1	13585.8	12891.7	15475.4	15528.5	15702.9	15368.7
C18_positive	MW0111340	Trimethylamine N-oxide	氧化三甲胺	Alcohol and amines	醇、胺类	Amines	胺类	C3H9NO	122.078	75.0684	0.7474	M+HCOO+2H	8.48448	1	0.8295	rp	1184-78-7	1145	HMDB0000925	5876	C01104	43132.8	44648.1	41905.3	54050.7	21101.4	29619.4	26322	38091	21318.4	38037	31624	39780.6	62292.2	66338.7	42587.4	46183.2	23443.6	5780.25	30223	10813.7	46385.8	30258.6	49965.1	44255	41335.3	42083.9	42205.3	41444
C18_positive	MW0110487	Zoledronic acid	唑来膦酸	Organic acid and Its derivatives	有机酸及其衍生物	Organic acid and Its derivatives	有机酸及其衍生物	C5H10N2O7P2	294.985	271.996	4.4549	M+Na	1.50736	2	0.7949	rp	118072-93-8	68740	HMDB0014543	-	-	25797.1	22875.4	23713.2	27573.3	28616.8	25566	23642.9	25343.5	31423.7	27187.1	27348.9	23800.6	28485.2	31887.7	22895.1	23927.1	25854.2	21723.2	28815.9	23505.6	28378.1	26766.7	28254.6	27607.6	29372.2	29812.8	29127.5	28185
C18_positive	MW0006060	2-Aminobenzoic acid	邻氨基苯甲酸	Phenolic acids	酚酸类	Phenolic acids	酚酸类	C7H7NO2	120.044	137.048	4.133	M+H-H2O	0.7	3	0.6853	rp	118-92-3	227	HMDB0001123	6018	C00108	977.899	1536.07	1423.8	1862.58	1441.96	1594.94	1529.56	1323.57	1838.95	1746.99	1659.2	1670.78	1529.52	1963.99	1023.46	1487.29	1343.49	1575.13	1854.81	1532.69	2090.91	1291	1765.93	1489.64	1614.35	1652.85	1588.62	1558.38
C18_positive	MW0103577	Guanosine	鸟苷	Nucleotide and Its metabolites	核苷酸及其代谢物	Nucleotide and Its metabolites	核苷酸及其代谢物	C10H13N5O5	284.099	283.092	1.5004	M+H	0.945804	1	0.9936	rp	118-00-3 | 26578-09-6 | 197227-95-5 | 103654-69-9 | 103654-70-2 | 146849-94-7 | 197227-93-3 | 202933-46-8 | 244769-87-7 | 247226-75-1 | 250586-91-5 | 250586-97-1 | 30747-23-0	135398635	HMDB0000133	-	C00387	5865.62	4553.01	4720.39	4802.66	4190.23	4422.14	5479.74	4943.91	4350.79	4298.77	3886.51	3557.11	1482.13	670.23	2278.09	802.961	1555.83	2305.61	5636.05	6155.31	6638.02	5144.08	5458.56	5604.08	2631.23	2693.02	2648.68	2589.47
C18_positive	MW0052530	Enantio-PAF C-16	-	GP	甘油磷脂类	PC	磷脂酰胆碱	C26H54NO7P	541.396	523.364	10.4762	M+NH4	5.91753	2	0.5683	rp	117985-57-6	2499	-	43413	-	29438.1	27753.5	26914.9	35425.7	30547	30607.9	35419.3	36744.9	43544	36166.1	34684.8	31836.4	33260.3	37338.9	27270	29666.8	42281.6	27085.2	34528.6	31649.1	38544.3	36760.6	41029.2	41543.4	31348.9	30977.3	30922.1	30323.7
C18_positive	MW0147794	Corticosterone acetate	醋酸皮质酮	Aldehyde,Ketones,Esters	醛、酮、酯类	Esters	酯类	C23H32O5	371.228	388.225	10.8083	M+H-H2O	12.8818	2	0.6463	rp	1173-26-8	255846	-	-	-	39651.6	37238.1	39974.9	51445.4	45372.8	39436.3	50013.6	57278.9	49781.1	45557.6	49019.4	44488.3	46734	51390.7	40367.8	38267.5	44882.3	38553.2	50229.5	43805.4	47735.8	47557.5	50867.7	51658.8	40214.1	41246.9	39954.4	40794.4
C18_positive	MW0002702	2-Aminoanthraquinone	2-氨基蒽醌	Benzene and substituted derivatives	苯及其衍生物	Benzene and substituted derivatives	苯及其衍生物	C14H9NO2	224.065	223.063	9.6829	M+H	15.0567	2	0.624	rp	117-79-3	8341	-	-	-	2.105	2.129	3.768	8.964	2.565	5.038	10.755	5.12	4.546	4.098	2.707	1.851	10.686	53.382	3.086	0.743	1.567	6.762	5.418	0.832	2.581	2.318	10.275	18.244	481.992	481.459	479.584	483.067
C18_positive	MW0013827	3,4-Dimethyl-5-pentyl-2-furanpentadecanoic acid	-	Organic acid and Its derivatives	有机酸及其衍生物	Organic acid and Its derivatives	有机酸及其衍生物	C26H46O3	407.337	406.345	10.3095	M+H	36.1664	4	0.582	rp	116627-42-0	131819622	HMDB0112081	-	-	25589.5	25060.6	24984.5	32050.7	28520.7	27600.8	28538.3	39715.1	34236.3	33583.4	30770.5	27433	30255.2	30236.9	22739	23711.5	28655.7	23135.1	30788.6	26069	31447.3	32473.3	31211.3	31632.6	29631.8	29292.4	29392	29030.9
C18_positive	MW0001815	2-(3,4-dichlorophenyl)-N-methyl-N-[(1S)-1-phenyl-2-(1-pyrrolidinyl)ethyl]acetamide	2-(3,4-二氯苯基)-N-甲基-N-[(1S)-1-苯基-2-(1-吡咯烷基)乙基]乙酰胺	Benzene and substituted derivatives	苯及其衍生物	Benzene and substituted derivatives	苯及其衍生物	C21H24Cl2N2O	429.088	390.127	11.7568	M+K	1.07775	4	0.9738	rp	116508-24-8	3082718	-	-	-	1745.51	1579.1	1785.83	1558.85	1104.42	1484.72	1016.96	1350.15	1794.61	1050.26	580.177	678.858	465.766	540.51	647.276	1019.79	1495.49	1550.46	1265.16	879.083	1162.9	1572.82	1353.38	2372.48	3015.14	3080.45	2862.95	3059.79
C18_positive	MW0111314	Thioetheramide PC	硫醚酰胺 PC	Organic acid and Its derivatives	有机酸及其衍生物	Phosphoric acids	磷酸类化合物	C40H84N2O5PS+	735.572	735.584	10.642	M+H	16.4075	2	0.8783	rp	116457-99-9	10259407	-	-	C04873	148736	39218	63815.3	61566	66086.2	57218.8	64329.9	75201.2	28511.5	101769	101014	94227	48175.7	151050	80020.7	69663	78377.1	81968.8	68375	55591.4	50522.2	74060.3	37634.7	69884.9	81584.2	89505.3	86994.6	80388.3
C18_positive	MW0013571	Ethylmethylacetic acid	2-甲基丁酸	Organic acid and Its derivatives	有机酸及其衍生物	Organic acid and Its derivatives	有机酸及其衍生物	C5H10O2	222.17	102.068	12.3901	2M+NH4	0.296281	2	0.5108	rp	116-53-0	8314	HMDB0002176	6528	C18319	18024.8	28772.2	16800.6	23669.9	17371.5	18350.3	14949.6	17101.5	15661.5	21210.5	15474.3	14311.7	8343.89	13447.7	11856.3	12703.5	3193.41	16405.1	16308.6	14082.1	4633.08	14728.5	14444.3	17401.3	12715.1	11781.9	7231.61	13007
C18_positive	MW0114604	Hydroxyacetone	羟基丙酮	Aldehyde,Ketones,Esters	醛、酮、酯类	Ketones	酮类	C3H6O2	112.999	74.0368	0.7926	M+K	1.2	3	0.9211	rp	116-09-6	8299	HMDB0006961	-	C05235	540.702	344.174	411.368	456.8	382.751	354.282	915.107	606.877	1140.76	968.445	778.986	720.761	152.237	83.164	350.064	231.941	345.255	351.832	1524.72	1543.21	1106.76	1079.11	1026.09	901.284	678.149	655.806	649.285	665.42
C18_positive	MW0007127	Fenoxanil	非诺沙尼	Benzene and substituted derivatives	苯及其衍生物	Benzene and substituted derivatives	苯及其衍生物	C15H18Cl2N2O2	329.078	328.075	5.1369	M+H	10.6419	2	0.8796	rp	115852-48-7	11262655	-	-	C18519	29918.8	28703.7	28072	37948.8	32619.8	33244.1	29792.6	36380.6	38226.5	35246.9	35945.8	35708.3	29788.6	38218.8	27255.7	25029.5	31157.8	21214.5	31975.3	30163.1	35181.8	36759.4	38951.1	35959.4	28151.8	28002.8	27917.9	28173.1
C18_positive	MW0127108	Methamidophos	甲胺磷	Alcohol and amines	醇、胺类	Amines	胺类	C2H8NO2PS	142.005	141.001	5.6991	M+H	9.29014	2	0.8313	rp	115182-35-9	4096	HMDB0031803	-	C18667	20813.9	21831.2	19189.8	21770.5	18823	18936.5	17619.6	19696.1	21448.8	20809	18053.6	17645.2	22049	23667	20661.4	21974.2	23896.2	17439	23603.5	18467.7	20781.2	21165.8	20702.7	22580.9	19018.4	20466	19810.8	19935.5
C18_positive	MW0112209	Isoprenyl alcohol	异戊烯醇	Alcohol and amines	醇、胺类	Alcohols	醇类	C5H10O	69.0696	86.0732	2.0039	M+H-H2O	0.513497	2	0.9647	rp	115-18-4	8257	HMDB0033854	-	-	174.904	166.946	275.718	244.333	121.192	160.398	233.195	188.445	204.959	100.576	131.659	214.144	227.405	387.794	85.582	107.989	150.327	172.042	128.024	200.6	203.242	180.49	302.396	245.419	983.735	989.892	996.082	971.772
C18_positive	MW0138148	Fenbuconazole	芬布康唑	Heterocyclic compounds	杂环化合物	Heterocyclic compounds	杂环化合物	C19H17ClN4	337.119	336.114	4.133	M+H	4.741	2	0.7738	rp	114369-43-6 | 119611-00-6	86138	-	72267	C18461	16955.8	15328.8	15665.4	18985.7	17976.5	18243.2	17775.6	17712.2	19855.4	20339.7	20471.9	16972.3	18510.3	20744	15106.6	17424.5	18105.5	14534.8	22918.3	17445	18889.5	20213.4	17682.2	19198.3	17845.3	18141.6	17843.9	17269.7
C18_positive	MW0111824	4-Hydroxy-1,8-dimethyl-4-propan-2-ylspiro[4.5]decane-3,9-dione	4-Hydroxy-1,8-dimethyl-4-propan-2-ylspiro[4.5]decane-3,9-dione	Aldehyde,Ketones,Esters	醛、酮、酯类	Ketones	酮类	C15H24O3	253.179	252.173	6.7688	M+H	4.75893	3	0.8896	rp	114317-58-7	85272666	HMDB0030915	-	-	0.752	1.213	1.055	1.833	0.858	1.221	1.552	0.853	0.06	1.618	0.592	0.323	1.399	11.894	0.43	1.652	1.003	0.964	1.297	0.553	0.682	1.075	2.886	2.728	94.805	94.161	94.637	95.1
C18_positive	MW0123327	Cidofovir	西多福韦	Others	其他	Medicine	药物	C8H14N3O6P	559.131	279.062	11.7483	2M+H	1.24013	2	0.9165	rp	113852-37-2	60613	HMDB0014513	-	C06909	4.867	0.101	0.618	0.527	0.131	0.796	4.783	4.239	0.673	0.681	0.217	0.129	0.547	15.405	12.376	2.435	0.064	0.047	3.517	0.026	0.234	0.064	6.581	6.106	187.6	186.223	178.752	183.844
C18_positive	MW0016032	Baclofen	巴氯芬	Benzene and substituted derivatives	苯及其衍生物	Benzene and substituted derivatives	苯及其衍生物	C10H12ClNO2	282.052	213.056	9.6847	M+Na+HCOOH	4.8219	2	0.665	rp	1134-47-0	2284	HMDB0014327	-	-	2.339	3.126	9.454	18.209	1.472	8.416	7.35	9.117	7.161	4.711	4.381	5.004	7.627	84.762	1.259	4.071	0.961	4.69	4.793	2.026	5.189	4.976	38.736	33.041	673.452	664.453	673.072	680.338
C18_positive	MW0121811	6,7,8,9-Tetrahydro-dibenzofuran-2-ol	6,7,8,9-四氢-二苯并呋喃-2-醇	Benzene and substituted derivatives	苯及其衍生物	Benzene and substituted derivatives	苯及其衍生物	C12H12O2	125.021	188.084	0.7019	M+Na+K	0.67575	4	0.7334	rp	1133-79-5	121024	-	-	-	1975.93	3469.14	4765.94	5087.05	3817.68	4886.64	3059.61	1567.35	2580.74	2534.23	1297.3	1644.27	8473.12	8367.26	6196.11	5785.81	4222.57	1544.62	2607.46	1790.98	5409.33	5128.88	1667.79	5753.67	3453.46	3609.19	1934.79	3276.35
C18_positive	MW0007494	Letrozole	来曲唑	Benzene and substituted derivatives	苯及其衍生物	Benzene and substituted derivatives	苯及其衍生物	C17H11N5	124.055	285.101	1.1978	M+H-C6H10O5	1.1135	4	0.7229	rp	112809-51-5	3902	HMDB0015141	-	C08163	580.143	1206.32	672.111	599.72	199.859	1021.45	1209.02	397.009	725.254	1212.8	942.247	1488.75	2027.28	2066.72	485.297	1445.88	1399.39	352.041	1258.88	1503.91	1425.83	289.1	1705.56	1610.48	1223.99	1039.06	1159.66	1233.85
C18_positive	MW0009889	Tetraconazole	四康唑	Benzene and substituted derivatives	苯及其衍生物	Benzene and substituted derivatives	苯及其衍生物	C13H11Cl2F4N3O	413.062	371.022	8.4442	M+CH3CN+H	14.2543	2	0.6803	rp	112281-77-3	80277	-	72296	C18490	1.757	0.868	9.648	8.669	4.679	4.303	8.604	4.868	2.854	6.085	7.402	4.154	13.353	48.872	2.179	1.876	4.97	1.091	5.356	3.278	6.554	6.063	17.369	11.091	261.067	261.068	258.176	259.233
C18_positive	MW0147332	Cephalostatin 1	头孢他汀 1	Heterocyclic compounds	杂环化合物	Heterocyclic compounds	杂环化合物	C54H74N2O10	933.516	910.534	0.6567	M+Na	6.97057	4	0.8529	rp	112088-56-9	10328411	-	-	C20060	15820	12326.7	11276.8	12842	16377.2	14474	10942.2	17814.6	18289.6	13745	15104.5	10447.8	12110.1	15352.6	17202.1	12479.7	17866.9	13012	17912	16693.5	10393.4	14015	10135.5	10404.7	14724.8	14926.3	14935.5	15151.9
C18_positive	MW0012353	13-Docosenamide	13-多考酰胺	Alcohol and amines	醇、胺类	Amines	胺类	C22H43NO	338.342	337.334	11.809	M+H	0.532695	2	0.9488	rp	112-84-5	5365371	HMDB0244507	64926	-	164901	192344	781812	168244	157027	237841	271995	271226	351428	306502	952939	211838	432065	404376	272703	904462	286723	300102	435106	266316	782157	464354	2.18445e+06	832543	255363	201411	208004	216501
C18_positive	MW0055469	Oleic acid	油酸盐	FA	脂肪酰类	FFA	游离脂肪酸	C18H34O2	329.269	282.256	10.355	M+HCOO+2H	1.675	3	0.8238	rp	112-80-1	445639	HMDB0000207	190	C00712	1206.63	1204.79	1581.61	1164.26	1599.17	1173.87	0.932	2.639	12.553	1.331	16.633	22.847	906.717	754.613	1174.92	959.334	1560.68	1998.35	108.577	4.564	2.951	17.105	3.637	15.987	218.822	191.295	218.958	191.796
C18_positive	MW0111751	10-Undecenal	10-十一碳烯	Aldehyde,Ketones,Esters	醛、酮、酯类	Aldehydes	醛类	C11H20O	151.148	168.151	5.7053	M+H-H2O	6.46175	4	0.612	rp	112-45-8	8187	HMDB0031128	-	-	0.076	0.122	0.415	0.21	0.128	0.134	0.297	0.057	0.07	0.046	0.103	0.053	0.252	2.849	0.027	0.023	0.238	0.061	0.082	0.046	0.441	0.077	0.668	0.199	24.386	25.042	24.539	24.024
C18_positive	ZINC1596062	1-Undecanol	1-十一烷醇	Alcohol and amines	醇、胺类	Alcohols	醇类	C11H24O	300.254	172.183	7.4764	3M+2Na+K-H	10.7113	4	0.5427	rp	112-42-5	8184	HMDB0013113	-	-	122.702	384522	352825	441579	395749	91.013	79.082	408383	244.029	409626	33.46	394139	101.3	284.434	380575	380125	396903	369615	107.427	160.883	408307	398340	158.65	236.942	33123	33357.8	32182.7	30017.6
C18_positive	MW0054909	Methyl hexadecanoic acid	十六烷酸甲酯	FA	脂肪酰类	Others	其他	C17H34O2	312.29	270.256	5.5414	M+CH3CN+H	1.09335	2	0.7444	rp	112-39-0	8181	HMDB0061859	-	C16995	1960.58	1995.96	2131.58	1367.16	2328.53	1708.51	26803.3	27687.6	29602.5	26649.5	27489.7	28547.2	1149.15	1279.83	1245.74	1443.57	665.866	587.984	8490.72	1826.14	16243.9	8901.41	18644.6	23006.1	4725.78	5202.7	5174.77	4974.9
C18_positive	MW0103035	Undecylenic acid	10C-十一烯酸	FA	脂肪酰类	FFA	游离脂肪酸	C11H20O2	167.143	184.146	6.0279	M+H-H2O	1.675	4	0.9598	rp	112-38-9	5634	HMDB0033724	-	C13910	0.266	0.12	0.227	1.294	0.709	0.518	0.09	1.775	0.519	0.443	0.481	0.072	0.825	14.789	0.985	0.131	0.909	0.16	0.476	0.242	0.938	0.522	2.593	0.503	106.451	107.429	105.205	106.833
C18_positive	MW0115424	Triethylene glycol monomethyl ether	三甘醇单甲醚	Alcohol and amines	醇、胺类	Alcohols	醇类	C7H16O4	129.091	164.105	8.4594	M+H-2H2O	0.989389	2	0.7226	rp	112-35-6	8178	HMDB0062666	-	-	7126.54	6411.06	7552.2	9128.07	6829.56	7031.47	7322.99	7447.19	8996.72	7803.52	7412.87	7077.64	8078.51	9370.67	7523.68	6719.1	7180.53	6786.66	7722.24	7036.86	8055.28	7514.16	9721.41	9440.67	11404.9	11340	11758.1	11053.1
C18_positive	MW0111335	Triethylenetetramine	三乙烯四胺	Alcohol and amines	醇、胺类	Amines	胺类	C6H18N4	185.115	146.153	12.2214	M+K	4.38313	2	0.6988	rp	112-24-3 | 105821-86-1	5565	-	-	C07166	58124.6	66016.8	57018.7	56486.2	48786.4	59895.5	131423	139129	51404.7	82157.3	71702.8	66726.5	101660	40441.9	45072.5	54853.2	53553.7	49138.4	64167.3	62966.3	51378.1	67020	63629.8	81272.7	67008.5	65678.3	66600.7	66278.5
C18_positive	MEDP0781	2-Undecanone	2-十一酮	Aldehyde,Ketones,Esters	醛、酮、酯类	Ketones	酮类	C11H22O	363.32	170.167	9.7599	2M+Na	5.67125	2	0.6193	rp	112-12-9	8163	HMDB0033713	-	C01875	9583.95	8371.82	7100.23	12068.9	12178	9595.63	11292.2	9582.48	12473.9	10864.1	11303.9	10406.3	11576.1	11709.2	8791.36	10864	9781.05	6486.47	7008.75	8643.63	10048.7	10325.2	8604.68	11908.6	9871.7	9937.85	9813.7	9836.23
C18_positive	MW0055349	Pelargonic acid	壬酸	FA	脂肪酰类	FFA	游离脂肪酸	C9H18O2	205.143	158.131	9.9874	M+HCOO+2H	4.03158	2	0.5917	rp	112-05-0	8158	HMDB0000847	5810	C01601	46795.8	49559.4	54111.2	52778.5	59218.7	55879.3	38340.4	44152.2	42805.7	48610.8	52842	40111.9	60517.2	59382.9	50184	49683.9	49051.7	43563.1	48213	42508	54057.3	61654.7	39831.5	60033.5	48826.8	50292.4	50799.2	51651.1
C18_positive	MW0148192	Decoside	德科赛德；Decogenin 3-O-ALPHA-L-齐墩果苷	Heterocyclic compounds	杂环化合物	Heterocyclic compounds	杂环化合物	C30H42O9	246.116	546.283	3.1331	M+2H-C4H8	0.213992	4	0.7447	rp	111508-63-5	441854	-	-	C08860	1.917	2.529	2.607	3.386	2.61	0.145	2.588	0.88	0.171	0.08	1.099	0.868	3.289	0.714	1.892	0.098	0.283	1.947	2.586	2.577	0.49	1.332	0.738	0.691	83.263	79.978	85.161	84.692
C18_positive	FDATP00245	Metformin hydrochloride	Metformin HCl	Others	其他	Medicine	药物	C4H12ClN5	369.113	165.078	2.0191	2M+K	0.308	4	0.7424	rp	1115-70-4 | 15537-72-1	14219	HMDB0001921	-	-	1183.17	415.551	1305.69	841.312	255.959	1006.66	1723.24	1527.51	1707.03	2165.29	1370.07	1427.92	527.713	1569.93	1309.62	1220.35	1266.69	329.198	1664.63	977.422	2148.99	1034.57	1349.24	1161.77	1056.94	1020.83	1093.73	1104.95
C18_positive	MW0108615	N-Acetyl-DL-methionine	N-乙酰基-DL-蛋氨酸	Amino acid and Its metabolites	氨基酸及其代谢物	Amino acid derivatives	氨基酸衍生物	C7H13NO3S	421.103	191.062	4.133	2M+K	1.535	4	0.9631	rp	1115-47-5	6180	-	62466	-	9395.21	8048.39	8665.45	10689.8	9923.25	9693.35	9929	9648.42	11271.6	11396.3	10793.7	9833.93	9610.13	11730.9	8502.25	10004.4	9582.61	7832.72	11131.7	8925.4	10224.9	10991.6	9815.6	10322.2	10010.3	10425.9	10161.4	9684.15
C18_positive	MW0054814	Methyl 10-undecenoate	10-十一碳烯酸甲酯	FA	脂肪酰类	Others	其他	C12H22O2	199.169	198.162	6.7921	M+H	0.05	4	0.7488	rp	111-81-9	8138	HMDB0029585	-	-	972.09	939.734	710.048	771.453	742.347	711.566	656.546	937.557	911.498	580.827	774.062	658.794	814.348	1121.59	707.817	700.863	745.933	791.752	923.103	719.01	793.264	918.999	908.549	929.104	2385.99	2468.9	2441.35	2410.49
C18_positive	MW0112097	2-Butoxyethanol	2-丁氧基乙醇	Alcohol and amines	醇、胺类	Alcohols	醇类	C6H14O2	163.075	118.099	9.3792	M-H+2Na	10.4201	2	0.8241	rp	111-76-2	8133	HMDB0031327	-	C19355	28013.9	27090.1	27037.9	31393.6	29030	28291.2	32111.8	45208.7	38749.7	34790.1	34179.5	30742.6	31650.5	33059	25504.2	27268.8	28622.8	24673.1	33124.7	30178.3	34190.8	34496.9	35255.5	35783.9	29905.7	30167.9	29689.5	29972.1
C18_positive	MW0012808	1-Heptanol	1-庚醇	Alcohol and amines	醇、胺类	Alcohols	醇类	C7H16O	139.111	116.12	4.0267	M+Na	2.788	4	0.6849	rp	111-70-6	8129	HMDB0031479	-	-	60.255	65.457	51.011	66.029	78.306	50.712	69.512	86.947	112.487	46.84	54.937	65.32	80.275	49.066	53.373	29.775	94.312	73.712	66.125	55.002	57.402	77.536	71.517	88.778	540.789	573.423	547.354	568.451
C18_positive	MW0111232	n-Oleoylethanolamine	正油酰乙醇胺	Alcohol and amines	醇、胺类	Amines	胺类	C20H39NO2	326.306	325.298	6.9663	M+H	2.26776	2	0.9365	rp	111-58-0	5283454	HMDB0002088	-	-	12814.1	11484.8	10957.8	11253.8	9017.21	7932.67	67981.2	70753.7	71617.8	71960.2	68142	68897.2	135.922	471.956	797.504	182.63	924.9	620.992	18.301	32265.7	9.598	19.088	19.931	31531.5	14352.7	14455.7	14351.4	14453.4
C18_positive	MW0111290	Stearoylethanolamide	硬脂酰乙醇酰胺	Alcohol and amines	醇、胺类	Amines	胺类	C20H41NO2	328.321	327.314	5.889	M+H	0.501774	2	0.9169	rp	111-57-9	27902	HMDB0013078	-	-	36466.7	33621.2	42702.5	34797.6	35281.2	6605.24	581559	507403	600172	575899	557431	647427	89019	240830	95719.5	81781.9	159683	105376	298131	178890	330486	268440	352646	379765	84332.2	85260.5	84894.2	85183.8
C18_positive	MW0110995	Diethanolamine	二乙醇胺	Alcohol and amines	醇、胺类	Amines	胺类	C4H11NO2	150.045	105.079	4.4094	M-H+2Na	11.895	2	0.6867	rp	111-42-2	8113	HMDB0004437	3239	C06772	8169.61	7255.1	9209.43	9374.89	6292.92	7054.32	6927.85	7515.1	7997.1	7456.12	7814.23	7505.99	10732.3	14077.5	6729.61	7044.79	8164.42	6862.14	7841.36	7367.09	8747.36	7882.78	11321.7	10352.8	17117.6	17176.3	17176.4	16616.2
C18_positive	MW0168459	1-Hexylamine	己胺	Alcohol and amines	醇、胺类	Amines	胺类	C6H15N	102.127	101.12	12.2054	M+H	1.47056	2	0.8672	rp	111-26-2	8102	HMDB0032323	-	C08306	177516	208332	174628	156222	149932	155758	211649	213992	195690	205276	243855	167505	206839	190312	209147	140494	143781	127011	187535	183465	175622	173323	116893	255778	174879	176224	179360	178891
C18_positive	MW0063484	Sebacic acid	癸二酸	FA	脂肪酰类	FFA	游离脂肪酸	C10H18O4	185.115	202.12	0.6265	M+H-H2O	6.49651	2	0.8971	rp	111-20-6	5192	HMDB0000792	4240	C08277	194004	178044	175454	192692	186909	182174	160267	187581	254803	168357	200422	160857	207361	225783	167428	169700	198341	157363	195442	169333	174902	238284	175402	190250	193185	198507	196692	198609
C18_positive	MW0054875	Methyl caprylate	辛酸甲酯	FA	脂肪酰类	Others	其他	C9H18O2	205.143	158.131	12.3901	M+HCOO+2H	0.972204	2	0.6413	rp	111-11-5	8091	HMDB0031291	-	-	251012	284481	228715	279157	343358	273046	261618	260981	287668	298133	269694	277807	308047	280712	214570	207043	208099	240182	254746	317387	302204	288059	298679	308222	259928	259366	255260	259768
C18_positive	MW0109597	Selfotel	自助酒店	Organic acid and Its derivatives	有机酸及其衍生物	Phosphoric acids	磷酸类化合物	C7H14NO5P	224.065	223.061	6.7536	M+H	7.55084	2	0.7208	rp	110347-85-8 | 113229-62-2	68736	-	-	-	61901.8	58526.9	65918.2	78160	60157.5	62242.5	46065.2	63613.3	79161.6	65657.4	56665.9	48302.2	53339.4	70192.7	48499.4	49304.8	59642	68206.5	54110.6	67055.8	50048.5	49772.8	55403.1	60291.5	109288	109221	110573	107586
C18_positive	MW0154930	Paspaline	帕斯帕林	Heterocyclic compounds	杂环化合物	Heterocyclic compounds	杂环化合物	C28H39NO2	482.239	421.298	7.7532	M+Na+K-H	11.679	4	0.5288	rp	11024-56-9	115028	-	-	C20530	576.702	903.814	115.852	410.509	597.665	197.755	204.535	556.019	77.425	430.753	420.984	323.042	356.127	383.222	272.477	70.434	178.081	149.296	325.756	272.805	502.537	140.112	805.825	714.745	494.433	472.46	501.444	343.845
C18_positive	MW0113755	6-Methyl-5-hepten-2-one	6-甲基-5-庚烯-2-酮	Aldehyde,Ketones,Esters	醛、酮、酯类	Ketones	酮类	C8H14O	109.101	126.105	4.2581	M+H-H2O	0.710266	2	0.953	rp	110-93-0	9862	HMDB0035915	-	C07287	151425	137216	160568	164246	142140	139004	144633	153190	166583	161219	153687	153097	145171	197045	124291	122619	144006	138234	149101	134970	159832	152381	166501	166919	248065	251735	249328	245354
C18_positive	MW0127444	Diethyl disulfide	二乙基二硫	Others	其他	Others	其他	C4H10S2	145.007	122.022	0.1784	M+Na	3.4795	4	0.6702	rp	110-81-6	8077	HMDB0029572	-	-	28367.1	27982.9	33461.3	32329.5	34100.8	28316.2	27902.1	25982	34325.3	30346	36228.8	28995.3	32847.5	36856.5	9980.59	6584.04	29463	27398.9	40863.9	32257.2	41596.7	29228	3705.58	31460.4	30440.1	30359.1	30884.2	29819
C18_positive	MW0111993	2,5-Hexanedione	2,5-己二酮	Aldehyde,Ketones,Esters	醛、酮、酯类	Ketones	酮类	C6H10O2	73.0646	114.068	3.6314	M+H-COCH2	2.301	4	0.6957	rp	110-13-4	8035	-	-	-	2224.65	1898.32	2940.8	3037.61	2736.95	2415.71	2512.46	2765.56	3333.49	2172.97	2663	9502.14	2941.03	2978.25	2123.53	2806.21	2079.83	2957.28	2265.13	2524.6	2896.53	2019.54	3798.55	3427.48	3076.11	3433.51	3290.35	3254.12
C18_positive	MW0062160	Pregnanetriol	孕烯醇	Hormones and hormone related compounds	激素及激素相关物质	Hormones and hormone related compounds	激素及激素相关物质	C21H36O3	473.265	336.266	8.1385	M+Na+CF3COOH	11.387	4	0.7829	rp	1098-45-9 | 13933-75-0	101967	-	-	-	6827.92	7276.43	8914.51	7456.68	8431.13	7320.21	7654.31	11933.1	10381.5	12900.9	7430	7895.75	9079.18	11896.1	9355.55	8607.8	8956.6	7600.87	9596.72	10998.4	9222.06	9572.09	10270.2	10020.2	9334.5	9818.81	9935.98	9569.42
C18_positive	MW0010413	Pentane	戊烷	Others	其他	Hydrocarbon derivatives	烃衍生物	C5H12	139.112	72.0939	4.7584	3M+Na+K	5.24895	4	0.6346	rp	109-66-0	8003	HMDB0029603	-	-	22.978	28.191	13.575	11.507	13.361	14.395	28.53	8.162	17.397	20.875	17.379	26.885	29.994	26.879	5.315	17.033	17.055	11.422	12.644	9.398	29.927	27.074	14.754	17.813	500.653	492.743	487.961	474.93
C18_positive	MW0052326	Dibutyl sebacate	癸二酸二丁酯	Aldehyde,Ketones,Esters	醛、酮、酯类	Esters	酯类	C18H34O4	332.28	314.246	7.8442	M+H+NH3	5.72575	4	0.6255	rp	109-43-3	7986	HMDB0041220	-	-	33941.8	33433	31100.9	38394	34409.2	33118.9	32734.4	35507.7	38685.3	35615.7	36195.1	34269.2	42.176	46.093	79.946	12.565	23.454	22.176	180.928	158.374	89.662	127.121	183.846	66.339	34239.2	34529.4	34053.3	34240.4
C18_positive	MW0119698	3-Methyl-3H-imidazo[4,5-f]quinoxalin-2-amine	3-甲基-3H-咪唑并[4,5-f]喹喔啉-2-胺	Heterocyclic compounds	杂环化合物	Heterocyclic compounds	杂环化合物	C10H9N5	238.045	199.086	0.717	M+K	10.5118	4	0.5456	rp	108354-47-8	105041	HMDB0040443	-	-	169.384	302.624	367.066	226.323	766.976	867.607	502.879	235.805	214.764	1094.84	554.467	739.977	64.782	149.282	25.256	165.645	114.642	38.038	393.317	55.709	217.45	105.629	297.202	82.918	1521.94	1490.92	1476.65	1442.02
C18_positive	MW0109066	Pentasine	戊烷	Organic acid and Its derivatives	有机酸及其衍生物	Organic acid and Its derivatives	有机酸及其衍生物	C30H49N6O10+	318.678	653.351	2.4008	M+2H-H2O	1.50455	4	0.7138	rp	108133-63-7	6443880	HMDB0029803	-	-	1.16177e+07	1.14436e+07	1.05003e+07	1.31417e+07	1.17777e+07	1.13361e+07	1.12045e+07	1.21537e+07	1.32414e+07	1.21907e+07	1.2389e+07	1.17298e+07	1.26588e+07	1.39715e+07	1.13261e+07	1.13128e+07	1.18121e+07	1.1e+07	1.29107e+07	1.21303e+07	1.21515e+07	1.18549e+07	1.10097e+07	1.18543e+07	36142.2	29974.5	33799.7	33367.8
C18_positive	MW0114511	Fumagillol	烟曲霉醇	Heterocyclic compounds	杂环化合物	Heterocyclic compounds	杂环化合物	C16H26O4	265.18	282.183	5.852	M+H-H2O	4.7265	4	0.6448	rp	108102-51-8	222778	-	85094	-	1.457	2.068	1.227	1.992	1.367	0.924	2.309	0.909	2.238	1.921	0.938	0.698	1.586	7.943	0.646	0.767	1.2	0.7	2.164	2.376	1.951	1.387	2.904	1.405	211.349	226.854	253.278	230.717
C18_positive	MW0106228	Cyclohexylamine	环己胺	Alcohol and amines	醇、胺类	Amines	胺类	C6H13N	163.113	99.1048	4.2581	M+CH3CN+Na	19.1358	2	0.6441	rp	108-91-8	7965	HMDB0031404	-	C00571	3.29	0.395	4.702	2.405	1.013	4.969	8.546	14.864	10.797	3.243	6.652	1.91	3.474	44.785	5.136	3.095	6.211	1.991	3.393	0.856	5.421	5.737	2.136	2.252	116.795	119.796	129.653	110.279
C18_positive	MW0112008	2,6-Dimethyl-4-heptanone	2,6-二甲基-4-庚酮	Aldehyde,Ketones,Esters	醛、酮、酯类	Ketones	酮类	C9H18O	263.143	142.136	2.4919	3M+Na+2K-H	0.58675	4	0.7355	rp	108-83-8	7958	HMDB0031417	-	-	2.03	3.709	3.233	7.053	0.68	4.195	2.265	12.213	9.692	6.139	2.942	1.533	1.341	8.928	4.477	7.484	4.267	2.347	6.86	0.68	5.17	2.394	9.286	2.074	65.284	69.96	75.92	71.137
C18_positive	MW0014197	3-Methylxanthine	3-甲基黄嘌呤	Nucleotide and Its metabolites	核苷酸及其代谢物	Nucleotide and Its metabolites	核苷酸及其代谢物	C6H6N4O2	167.055	166.049	9.6795	M+H	3.10137	2	0.8262	rp	1076-22-8	70639	HMDB0001886	2820	C16357	133824	148.932	120952	151378	135667	130580	328.542	484.09	176.423	206.683	142708	135115	145815	2767.24	130465	130311	136062	75.374	68.914	172.526	139972	136555	616.521	599.342	34231.1	30613.2	33164.5	32151.3
C18_positive	MW0143476	5-(3-(2,6-Dichloro-4-(4,5-Dihydro-2-Oxazolyl)phenoxy)propyl)-3-Methyl Isoxazole	5-(3-(2，6-二氯-4-(4，5-二氢-2-恶唑基）苯氧基）丙基)-3-甲基异恶唑	Benzene and substituted derivatives	苯及其衍生物	Benzene and substituted derivatives	苯及其衍生物	C16H16Cl2N2O3	355.07	354.054	11.1113	M+H	22.8349	3	0.6965	rp	107355-76-0	129539	-	-	C06499	2688.86	3426.39	2841.38	2708.05	2092.13	2013.35	2156.93	1595.32	2049.81	1310.48	1629.32	1059.81	1556.2	2858.55	1111.77	2075.8	2293.05	1609.57	2068.31	1747.24	2276.56	2667.49	5341.92	3422.63	10078.3	9910.56	9647.79	9960.93
C18_positive	MW0122963	Auranthine	黄嘌呤	Heterocyclic compounds	杂环化合物	Heterocyclic compounds	杂环化合物	C19H14N4O2	361.092	330.112	5.7144	2M+Na+K	0.8105	4	0.7301	rp	107290-05-1	130919	-	-	-	2298.54	1782.27	1666.15	2988.69	1981.15	1875.1	1891.26	1914.77	2429.8	2172.84	1574.51	2237.42	1939.38	2595.49	2337.53	2237.46	1516.78	1694.78	2560.21	2281.26	2312.12	1604.21	2785.91	2570.1	2025.07	1994.76	1953.15	2021.38
C18_positive	MW0127560	S-Ethylisothiourea hydrobromide	S-乙基异硫脲氢溴酸盐	Benzene and substituted derivatives	苯及其衍生物	Benzene and substituted derivatives	苯及其衍生物	C3H9BrN2S	105.048	185.965	1.334	M+H	0.124216	2	0.7238	rp	1071-37-0	200213	-	64867	-	10764.5	10629	10432.4	12535.3	10391.1	9933.23	10271.7	11125.6	11463.8	10930.6	9368.03	10019.2	12572	13542.7	10667.2	10545.1	11485.8	9672.6	12523.4	9746.83	11291.3	9944.17	11817.8	11734.6	10209.6	10227.5	10448.1	10123.3
C18_positive	MW0104668	2-Aminoethyl dihydrogen phosphate	2-氨基乙基磷酸二氢盐	GP	甘油磷脂类	PE	磷脂酰乙醇胺	C2H8NO4P	283.05	141.019	8.4442	2M+H	9.65259	2	0.8631	rp	1071-23-4	1015	HMDB0000224	5233	C00346	181.773	159.692	264.695	293.318	152.667	195.234	296.983	243.84	264.997	245.556	166.215	192.971	269.787	783.348	174.858	128.666	182.517	164.217	192.803	159.662	203.588	190.981	479.028	348.275	3812.8	3814.95	3859.38	3734.83
C18_positive	MW0114068	Chloromethyl methyl ether	氯甲基甲醚	Others	其他	Others	其他	C2H5ClO	81.0168	80.0029	1.1229	M+H	16.5093	3	0.6787	rp	107-30-2	7864	HMDB0031332	-	C19160	58180.5	53632.3	54823.4	69386.1	58242.7	62019.8	62680.3	48361	75247.7	67316.6	56988.2	61686.5	47259.4	74347.2	24568.2	51230.5	54643	45629	64673.1	39555.9	69328.6	72903.8	64961.2	62202.6	47361.2	44007.5	48464.9	47175.9
C18_positive	MW0147406	Chloroacetonitrile	氯乙腈	Others	其他	Others	其他	C2H2ClN	113.951	74.9876	13.6699	M+K	9.44198	4	0.5618	rp	107-14-2	7856	-	-	C19360	1873.84	1754.13	1683.37	1769.78	1504.38	1424.41	1645.72	793.195	1659.83	1504.85	2124.76	1221.73	1943.17	2315.44	1741.12	1764.27	1867.14	3361.81	2269.97	1518.2	1425.29	2018.76	1754.83	2209.77	1645.67	1619.57	1650.58	1616.54
C18_positive	MW0115598	1,2-Dichloroethane	1，2-二氯乙烷	Others	其他	Hydrocarbon derivatives	烃衍生物	C2H4Cl2	98.9747	97.969	12.2521	M+H	3.21169	3	0.8377	rp	107-06-2	11	HMDB0029571	-	C06752	76707.2	100737	99987.6	96016	92496	85502.6	77937.3	77736.3	120834	119175	117350	92595.1	85584.6	115771	83633.8	83057.7	91449.4	85456.5	101262	112452	108275	114916	105941	106479	87989.9	89402.3	88614.9	86611.5
C18_positive	MW0015941	L-Ascorbic acid monostearate	L-抗坏血酸单硬脂酸酯	FA	脂肪酰类	Others	其他	C24H42O7	579.278	442.293	2.5678	M+Na+CF3COOH	4.64378	4	0.6464	rp	10605-09-1	54676866	HMDB0038242	-	-	2.274	6.424	5.376	5.935	4.136	1.897	6.449	4.117	0.702	1.972	3.677	1.972	1.822	9.163	5.326	1.91	8.094	7.118	5.06	3.281	3.11	1.514	3.641	3.66	55.739	53.17	58.224	57.381
C18_positive	MW0010286	1,3-Butadiene	1，3-丁二烯	Others	其他	Hydrocarbon derivatives	烃衍生物	C4H6	77.0384	54.047	4.2636	M+Na	4.62553	4	0.6468	rp	106-99-0	7845	HMDB0041792	-	C16450	487.459	283.301	501.635	518.773	427.864	448.891	490.13	656.502	470.085	526.313	537.555	666.49	247.642	619.896	316.45	394.978	320.882	402.917	612.008	589.79	674.687	478.55	629.326	683.501	1030.43	1026.68	993.654	1020.1
C18_positive	MW0119783	1,2-Epoxy-4-vinylcyclohexane	1,2-环氧-4-乙烯基环己烷	Heterocyclic compounds	杂环化合物	Heterocyclic compounds	杂环化合物	C8H12O	125.096	124.089	3.8289	M+H	2.03775	4	0.7016	rp	106-86-5	7832	-	-	-	1584.41	1431.5	1868.15	2120.47	1300.75	1269.14	1271.19	1427.99	1382.91	1699.18	3110.63	1222.08	1902.49	10097.8	1430.6	1118.55	1734.64	1187.27	1573.36	1227.74	2225.37	1377.21	2142.18	1718.07	3593.61	3588.15	3615.69	3577.72
C18_positive	MW0004752	4-Bromoaniline	4-溴苯胺	Benzene and substituted derivatives	苯及其衍生物	Benzene and substituted derivatives	苯及其衍生物	C6H6BrN	209.928	170.968	12.982	M+K	3.40075	4	0.6718	rp	106-40-1	7807	-	-	-	7982.44	5414	5884.24	6668	7971.54	7522.34	5742.24	6140.26	5070.75	6469.3	6735.91	5278.3	6376.4	9447.83	6309.68	7730.53	2841.59	6077.5	9401.68	7034.62	6066.59	3231.06	6547.72	6759.54	6899.64	7133.39	7064.69	6953.76
C18_positive	MW0055457	Oenanthic ether	庚酸乙酯	Aldehyde,Ketones,Esters	醛、酮、酯类	Esters	酯类	C9H18O2	181.122	158.131	3.2286	M+Na	3.63766	2	0.6433	rp	106-30-9	7797	HMDB0000798	5763	-	2.999	3.792	2.202	2.377	3.196	3.13	4.872	5.518	2.022	3.203	4.54	4.181	3.751	13.119	2.194	3.017	1.693	3.356	2.338	4.132	4.172	3.265	6.004	3.414	139.773	134.658	138.869	139.525
C18_positive	MW0012533	16Z,19Z,22Z,25Z,28Z,31Z-tetratriacontahexaenoic acid	-	FA	脂肪酰类	FFA	游离脂肪酸	C34H56O2	497.424	496.428	11.4601	M+H	22.4373	2	0.722	rp	105528-06-1	52921817	-	74378	-	170659	92974.5	84651.4	102187	101545	186169	102437	139552	126576	113430	109475	100377	197597	113167	82365.2	88396.4	100644	80887.8	104494	99525.5	106029	122695	125646	126505	99150.3	96918.3	98064.2	98673.6
C18_positive	MW0063348	Rhodinyl propionate	丙酸罗丁酯	FA	脂肪酰类	Others	其他	C13H24O2	213.185	212.178	7.2073	M+H	0.92475	4	0.7274	rp	105-89-5	7781	HMDB0037187	-	-	0.218	0.308	0.458	0.134	0.449	0.167	0.557	0.384	0.332	0.219	0.101	0.063	0.471	1.303	0.076	0.05	0.058	0.425	0.142	0.185	0.317	0.038	0.251	0.28	33.081	33.245	33.827	32.718
C18_positive	MW0053460	ganoderol A	灵芝酚A	Alcohol and amines	醇、胺类	Alcohols	醇类	C30H46O2	421.353	438.35	10.9142	M+H-H2O	17.9952	3	0.6078	rp	104700-97-2	13934284	HMDB0035728	-	-	45188.1	48693.4	41822.9	49230.7	46720.8	50443.6	50325.5	62415.4	58717	50449.3	49495.2	51699.9	43717.1	50860.9	43939.2	39685.4	46275.5	37869.9	49351.6	45138	51740.1	53638.4	53938.9	64039.5	49825.1	47987	48920.7	48180.6
C18_positive	MW0017100	Chrysanthemic acid	菊花酸	Organic acid and Its derivatives	有机酸及其衍生物	Organic acid and Its derivatives	有机酸及其衍生物	C10H16O2	123.117	168.115	5.1369	M+H-HCOOH	2.4255	4	0.6929	rp	10453-89-1 | 26771-11-9	2743	-	41098	-	17.321	17.89	35.863	40.918	25.031	26.069	25.77	3.834	35.738	28.323	28.348	26.525	28.666	39.904	22.737	19.36	22.571	22.941	25.242	11.074	46.852	35.477	9.545	22.893	235.014	224.231	215.538	186.821
C18_positive	MW0011359	(1S)-(+)-(10-Camphorsulfonyl)oxaziridine	(1S)-(+)-(10-樟脑磺酰基)恶氮丙啶	Benzene and substituted derivatives	苯及其衍生物	Benzene and substituted derivatives	苯及其衍生物	C10H15NO3S	247.122	229.077	0.5499	M+H+NH3	1.83975	4	0.7061	rp	104322-63-6 | 153221-24-0	7128360	-	-	-	1336.07	1302.88	945.305	1203.73	1163.34	1163.45	999.311	1259.33	1728.32	1205.59	1675.55	1279.32	1420.86	1647.86	1872.47	1594.11	1969.75	2024.5	2144.65	1602.57	1799.29	2716.27	2068.61	1925.91	2035.59	2110.04	2107.21	2046.57
C18_positive	MW0120325	4-Butyl-gamma-butyrolactone	4-丁基-γ-丁内酯	Aldehyde,Ketones,Esters	醛、酮、酯类	Esters	酯类	C8H14O2	143.106	142.099	3.601	M+H	1.18111	2	0.7633	rp	104-50-7	7704	HMDB0035422	-	-	4.557	6.059	8.518	7.892	5.691	5.706	13.004	6.332	6.003	3.283	5.607	4.983	5.147	46.467	4.8	4.445	5.983	4.226	3.832	2.606	4.679	2.691	8.191	7.017	253.813	252.011	258.281	248.03
C18_positive	MW0004515	4-[(Z)-(4-oxo-2-thioxo-1,3-thiazolidin-5-ylidene)methyl]benzoic acid	4-[(Z)-(4-oxo-2-thioxo-1,3-thiazolidin-5-ylidene)methyl]苯甲酸	Benzene and substituted derivatives	苯及其衍生物	Benzene and substituted derivatives	苯及其衍生物	C11H7NO3S2	287.979	264.987	0.9729	M+Na	3.16375	4	0.6768	rp	103987-82-2	1201238	-	-	-	1946.33	4895.44	2152.35	6855.45	5021.48	5214.94	1438.95	2313.99	2896.99	4261.05	2631.3	2089.8	6173.69	9837.71	3447.87	2540.59	2311.52	2263.22	3700.37	2160.95	4691.88	5183.51	1602.01	1722.55	3008.7	3075.57	2932.01	3106.37
C18_positive	MW0063552	N-[(15Z)-3-hydroxytetracos-15-enoyl]sphingosine-1-phosphocholine	N-[(15Z)-3-hydroxytetracos-15-enoyl]sphingosine-1-phosphocholine	SL	鞘脂类	SM	鞘磷脂	C47H93N2O7P	811.667	828.672	10.3853	M+H-H2O	6.45603	3	0.5009	rp	10390-14-4	53481791	HMDB0012654	-	C00550	5818.81	9489.85	6231.41	9748.85	11696.4	11644.9	1412.59	852.257	892.331	1556.28	1072.15	1259.57	6897.3	7870.87	4526.44	5089.01	3554.39	4318.18	6261.62	2770.89	1688.34	1554.98	1224.64	1305.24	3803.93	4093.31	3754.21	3722.51
C18_positive	MW0193947	2-Phenylacetamide	2-苯基乙酰胺	Benzene and substituted derivatives	苯及其衍生物	Benzene and substituted derivatives	苯及其衍生物	C8H9NO	118.065	135.068	4.1515	M+H-H2O	0.722639	1	0.6729	rp	103-81-1	7680	HMDB0010715	-	C02505	14272.4	12734.4	12916.4	16800.2	15475.5	14272.2	13726.8	14889.3	17382.2	15288	13937.4	13917.8	14926.2	18283.2	13446.9	13117.4	15938.1	12938.4	16691	13689.5	14755.6	14764.1	14980.4	14981.8	14360.5	15203.6	14836.8	14859.6
C18_positive	MW0122602	8-Cyclopentyl-1,3-dipropylxanthine	8-环戊基-1,3-二丙基黄嘌呤	Heterocyclic compounds	杂环化合物	Heterocyclic compounds	杂环化合物	C16H24N4O2	231.107	304.19	0.5575	2M+2Na+K	2.31525	4	0.6953	rp	102146-07-6	1329	-	44518	-	229.603	339.876	312.497	342.856	12.658	225.646	242.853	183.815	407.23	532.768	414.384	211.003	431.442	360.367	392.932	426.883	276.992	546.689	529.215	629.997	411.199	491.345	658.343	596.739	575.918	614.427	541.954	588.475
C18_positive	MW0111328	Tributylamine	三丁胺	Alcohol and amines	醇、胺类	Amines	胺类	C12H27N	186.222	185.214	4.2881	M+H	9.12525	4	0.5668	rp	102-82-9	7622	-	-	-	1847.5	2052.1	1650.59	2137.93	2433.51	1631.04	1558.58	3931.27	2440.34	1582.05	2244.6	2136.42	2409.44	2559.86	2018.03	2178.22	2464.61	2096.29	2180.82	2150.13	2598.27	2458.07	2181.36	1751.18	1803.43	2047.77	1943.87	1958.16
C18_positive	MW0111333	Triethanolamine	三乙醇胺	Alcohol and amines	醇、胺类	Amines	胺类	C6H15NO3	133.084	149.105	2.4767	M+H-NH3	2.0165	4	0.702	rp	102-71-6	7618	HMDB0032538	-	C06771	1769.09	1653.93	1869.26	2490.37	1756.75	1906.32	1353.81	1935.84	2407.79	1880.25	2114.65	2070.16	2405.07	3113.26	1946.52	2024.31	2074.23	1709.82	2536.59	1940.55	2596.55	2384.35	2458.91	2511.23	2151.93	2214.17	2194.42	2173.54
C18_positive	MW0110630	1-Phenylbiguanide	1-苯乙双胍	Benzene and substituted derivatives	苯及其衍生物	Benzene and substituted derivatives	苯及其衍生物	C8H11N5	195.139	177.101	4.5285	M+NH4	11.009	2	0.5621	rp	102-02-3	4780	HMDB29894	44226	-	0.085	0.029	0.023	0.036	0.037	0.075	0.089	0.14	0.557	0.057	0.009	0.06	0.064	0.515	0.108	0.016	0.078	0.097	0.041	0.016	0.055	0.18	0.008	0.11	27.843	30.374	26.951	28.581
C18_positive	MW0144814	Ala-Ala-Ala-Ala-Ala	L-丙氨酸-L-丙氨酸-L-丙氨酸-L-丙氨酸	Amino acid and Its metabolites	氨基酸及其代谢物	Small Peptide	小肽	C15H27N5O6	330.202	373.196	2.5982	M+H-CO2	5.33425	4	0.6329	rp	10183-34-3	4079599	-	-	-	3.068	4.516	4.86	7.099	1.147	0.619	5.679	1.299	1.604	4.121	0.668	2.464	20.291	2.365	4.835	11.723	5.413	9.278	6.432	8719.32	15.357	5.05	11.617	6.095	45.744	50.551	56.822	51.376
C18_positive	MW0006439	Butenafine hydrochloride	盐酸布替萘芬	Others	其他	Others	其他	C23H28ClN	371.229	353.191	2.4615	M+H+NH3	5.06925	4	0.6381	rp	101827-46-7	443867	-	-	-	2.71055e+06	255.611	2.41688e+06	971.34	2.71548e+06	2.64595e+06	2.61485e+06	2.83522e+06	3.06878e+06	2.6599e+06	2.87886e+06	2.72849e+06	2.83687e+06	3.04844e+06	2.47125e+06	2.5238e+06	2.74865e+06	308.792	2.90736e+06	2.83025e+06	2.65132e+06	2.76012e+06	2.46191e+06	2.58648e+06	29706.5	29378.5	32520.3	30630.2
C18_positive	MW0160670	2-Aminooctadec-4-ene-1,3-diol	2-Aminooctadec-4-ene-1,3-二醇	Alcohol and amines	醇、胺类	Alcohols	醇类	C18H37NO2	282.28	299.282	6.9183	M+H-H2O	1.425	3	0.9761	rp	10140-30-4	5353955	-	-	-	3352.61	3691.23	3202.88	3329.99	4217.06	3516.42	10880.9	12710.6	14138.4	14757.5	12918.9	11801.8	4765.56	4777.05	5093.69	5231.09	5068.36	7672.23	8390.38	5500.63	5387.15	4301.05	4081.72	5616.21	22421.6	22419.3	22669.8	22234.4
C18_positive	MEDP1035	2-Benzylideneoctanal	α-己基肉桂醛	Benzene and substituted derivatives	苯及其衍生物	Benzene and substituted derivatives	苯及其衍生物	C15H20O	217.155	216.151	1.3643	M+H	1.46175	4	0.7148	rp	101-86-0	7585	HMDB0031736	-	-	1.613	1.796	2.083	6.183	4.031	1.989	0.396	0.816	2.925	3.447	2.514	0.619	12.832	5.792	3.805	6.433	8.621	1.113	1.435	0.645	6.241	8.387	6.093	0.73	71.723	66.921	74.757	72.698
C18_positive	MW0008937	N-Benzyl-N,alpha-dimethylphenethylamine	d-苯丙胺	Benzene and substituted derivatives	苯及其衍生物	Benzene and substituted derivatives	苯及其衍生物	C17H21N	262.149	239.167	2.6058	M+Na	13.4992	4	0.5046	rp	101-47-3	2341	HMDB0015003	-	C07538	311.846	13.012	448.283	239.627	395.927	387.837	118.381	59.415	63.751	69.196	2.775	31.362	256.787	6.088	321.306	293.816	343.476	551.378	24.501	13.343	66.429	49.488	27.777	23.969	233.35	207.483	233.227	245.196
C18_positive	MW0120164	2-Hexyl-4-acetoxytetrahydrofuran	2-己基-4-乙酰氧基四氢呋喃	Heterocyclic compounds	杂环化合物	Heterocyclic compounds	杂环化合物	C12H22O3	237.148	214.157	4.2029	M+Na	2.76325	4	0.6855	rp	10039-39-1	61457	HMDB0037398	-	-	0.318	0.292	0.24	0.108	0.412	0.562	0.446	0.148	0.095	0.104	0.08	0.101	0.44	1.996	0.376	0.197	0.338	0.175	0.058	0.52	0.234	0.24	0.424	0.175	37.818	38.54	37.109	37.824
C18_positive	MW0111679	1,1-Dimethoxyheptane	1,1-二甲氧基庚烷	Others	其他	Hydrocarbon derivatives	烃衍生物	C9H20O2	183.138	160.146	4.2557	M+Na	3.325	4	0.9234	rp	10032-05-0	61453	HMDB0040432	-	-	0.287	0.289	0.407	0.72	0.243	0.425	1.478	0.609	0.434	0.179	0.062	0.458	0.182	14.351	0.382	0.207	0.095	0.212	0.419	0.161	0.172	0.159	0.94	0.753	146.224	146.186	135.494	144.671
C18_positive	MW0006140	Benzaldehyde	苯甲醛	Benzene and substituted derivatives	苯及其衍生物	Benzene and substituted derivatives	苯及其衍生物	C7H6O	170.061	106.042	1.1978	M+CH3CN+Na	8.48469	1	0.608	rp	100-52-7	240	HMDB0006115	-	C00261	27717.1	23288.8	24774	28890.2	23765.1	24767.1	24634.7	27928.5	28137.7	25754.4	25377.7	24208.1	31923.2	37517.7	25371.4	26451.4	28557.9	22749.6	28579.5	24070.2	27865.1	29108.1	30503.9	30085.4	22258.5	22914.8	23465.3	21044.1
C18_positive	MEDP0669	3-Chloroaniline	3-氯苯胺	Benzene and substituted derivatives	苯及其衍生物	Benzene and substituted derivatives	苯及其衍生物	C6H6ClN	128.026	127.019	5.7144	M+H	0.438188	1	0.9375	rp	-	7932	HMDB0245839	-	-	154430	125786	138163	158465	132012	133344	136384	122527	169052	133694	136304	139856	169163	184417	140857	148550	162113	126705	158495	131507	148443	156878	157056	173196	134037	134848	136517	132624
C18_positive	MW0107145	Glycyl-L-phenylalanine	甘氨酰-苯丙氨酸	Amino acid and Its metabolites	氨基酸及其代谢物	Small Peptide	小肽	C11H14N2O3	223.108	222.1	2.1785	M+H	1.55741	1	0.9122	rp	-	92953	HMDB0028848	23966	-	4137.7	3776.72	16.833	37.443	3658.62	3712.13	20779.1	21427.5	22720.9	23551.7	21227.7	21209.3	1204.35	1903.23	1276.38	1644.78	876.335	3713.13	1360.64	279.216	461.078	15.96	313.119	1342.47	7621.35	7723.91	7750.19	7621.32
C18_positive	MW0111256	Phosphocholine	磷酸胆碱	Organic acid and Its derivatives	有机酸及其衍生物	Phosphoric acids	磷酸类化合物	C5H15NO4P+	184.073	184.074	0.7474	M+H	1.176	1	0.9092	rp	-	1014	HMDB0001565	6326	C00588	105106	111199	109533	114624	74799.4	88057.4	174530	149056	84680.6	171400	127578	183873	80617.8	85309.4	62415.6	75002.3	26081.9	11709.2	221462	73806.8	361865	301512	330004	329861	121075	124434	122903	123023
C18_positive	MEDP1247	1-Deoxyvaleric-acid	1-脱氧淀粉酸	Organic acid and Its derivatives	有机酸及其衍生物	Organic acid and Its derivatives	有机酸及其衍生物	C15H22O2	235.169	234.162	9.1192	M+H	0.400353	1	0.9062	rp	-	-	-	-	C20404	4513.12	3652.62	3881.72	4455.17	4072.82	4747.59	4998.98	6349.4	5267.77	6150.77	4326.18	4170.3	5256.91	5296.27	3869.62	4087.98	4487.02	4431.44	5029.73	4890.63	4709.08	4936.81	5243.79	5706.9	5577.45	5526.41	5489.68	5581.05
C18_positive	MEDP1241	5-Hydroxy-2-oxo-4-ureido-2,5-dihydro-1H-imidazole-5-carboxylic acid ester	5-羟基-2-氧代-4-脲基-2,5-二氢-1H-咪唑-5-羧酸酯	Organic acid and Its derivatives	有机酸及其衍生物	Organic acid and Its derivatives	有机酸及其衍生物	C5H6N4O5	203.04	202.034	0.5499	M+H	1.28671	1	0.8905	rp	-	-	-	-	-	9805.79	8709.11	8805.66	9617.42	9580.86	9489.88	9614.92	8608.1	14272	11127.6	11284.5	9623.69	10992.6	10032.2	13692.5	11715.2	13410.7	15449.9	18578.5	16033.3	17256.7	19256.9	18815.5	18046	16228.4	16974.2	16114.7	16050
C18_positive	MW0110038	TRIPHENYL PHOSPHATE	磷酸三苯酯	Aldehyde,Ketones,Esters	醛、酮、酯类	Esters	酯类	C18H15O4P	327.079	326.071	8.8583	M+H	0.267552	1	0.8797	rp	-	8289	HMDB0259262	-	C14235	5364.92	5631.36	4276.68	8164.22	5450.9	5344.69	5183.12	9181.89	7214.73	6577.84	6641.46	5271.42	5684.58	6336.96	4423.59	4984.28	5225.44	4353.4	5958.45	5688.33	5800.27	5425.68	5904.19	7542.13	6803.64	6635.71	6707.17	6552.93
C18_positive	MEDP1171	1-O-Hexadecyl-2-O-(2E-butenoyl)-sn-glyceryl-3-phosphocholine	丁烯酰基PAF	Others	其他	Others	其他	C28H56NO7P	550.386	549.379	10.0936	M+H	3.1981	1	0.8765	rp	-	45138381	-	-	-	152.429	539.27	1115.29	96.07	499.224	806.552	8491.28	10895.1	10886.2	9004.15	7089.45	7289.94	69.726	804.551	477.149	203.348	909.507	550.678	6346.12	8673.88	4879.42	6287.71	6755.27	5868.75	8025.2	7851.04	7725.7	7984.88
C18_positive	MEDP1664	Glutamyl-leucyl-arginine	谷氨酸-亮氨酸-精氨酸	Amino acid and Its metabolites	氨基酸及其代谢物	Small Peptide	小肽	C17H32N6O6	417.245	416.238	2.2491	M+H	0.258786	1	0.8455	rp	-	25217475	-	-	-	2249.88	2378.71	2512.65	2120.15	2745.24	2547.88	31.892	94.914	7957.54	67.719	15.858	128.083	2448.07	3086.29	2997.72	3201.98	3014.81	3902.73	56.314	142.561	93.563	93.228	156.963	149.99	13109.7	13336.3	13691.9	13416.9
C18_positive	MEDTP01664	Carnitine C14:0	(±)-肉豆蔻酰肉碱	FA	脂肪酰类	CAR	酰基肉碱	C21H41NO4	372.312	371.304	7.1837	M+H	5.44513	1	0.8422	rp	-	-	-	-	-	6317.08	7950.66	8898.59	9249.92	5938.05	7620.41	686.548	4937.68	834.835	5709.68	7181.63	6192.52	8918.35	9290.82	9918.58	10405.2	6867.56	11054.5	9710.68	6394.34	11790.8	12689	15837.2	13877.5	6823.79	6919.83	6515.83	6796.06
C18_positive	MEDP1446	Octadecadienamide	十八碳二烯酰胺	Alcohol and amines	醇、胺类	Amines	胺类	C18H33NO	280.264	279.256	10.3853	M+H	2.26796	1	0.8163	rp	-	54225156	-	-	-	10599.3	22232.7	12856.3	13056.7	12150.2	12165.5	13814.1	19988.3	19759.3	18813.2	14215.1	12982.8	30746.9	14553.3	10993.8	11378.6	13013.6	11217	12899.4	11422.1	13626.4	17731.2	19282.4	15961.5	12545.9	12270	12343.4	12066.7
C18_positive	MEDTP02779	[(2R)-3-hexadecoxy-2-hydroperoxypropyl] 2-(trimethylazaniumyl)ethyl phosphate	[（2R)-3-六癸氧基-2-氢过氧丙基]2-(三甲基氮甲酰）磷酸乙酯	Others	其他	Others	其他	C24H52NO7P	498.346	497.348	8.7355	M+H	19.1669	1	0.7809	rp	-	21076389	-	-	-	5846.32	6107.34	6260.51	5862.69	6335.13	6037.47	10197.9	11662.8	11965.6	10371	8688.98	3123.46	5306.02	6695.46	7399.99	6074.79	10019.1	14584.4	10589.7	15025.5	7971.6	7187.11	8014.06	7028.85	9231.39	9088.07	9349.55	9222.82
C18_positive	MEDP1165	PC(O-16:0/O-2:0)	PC(O-16:0/O-2:0)	GP	甘油磷脂类	LPC	溶血磷脂酰胆碱	C26H56NO6P	576.343	509.385	10.4762	M-2H+3Na	12.0698	1	0.7417	rp	-	-	-	-	-	3561.23	3301.49	3653.83	3803.76	3772.58	3349.3	4819.75	5115.49	8203.35	3570.48	5392.89	4751.21	3043.62	3458.36	2962.56	3075.38	3559.67	3198.21	4873.06	4350.96	3787.01	2312.7	5851	5266.89	3965.88	3840.8	3767.53	3866.04
C18_positive	pmb0865	LPC(18:3/0:0)	LPC(18:3/0:0)	GP	甘油磷脂类	LPC	溶血磷脂酰胆碱	C26H48NO7P	518.322	517.317	8.5205	M+	2.17337	1	0.7362	rp	-	24779469	HMDB0010388	-	-	5888.77	5041.14	6029.4	5943.86	7179.63	5940.01	9852.84	10714.5	10987.1	9906.53	7846.77	8240.32	4922.62	5161.97	6521.51	6144.16	7953.9	11532	5619.45	8621.81	4594.32	4453.52	4635.44	4999.06	7922.71	7749.32	7737.86	7828.11
C18_positive	MEDP1398	Carnitine C16:1	肉碱 C16:1	FA	脂肪酰类	CAR	酰基肉碱	C23H43NO4	398.327	397.319	7.4461	M+	2.43883	1	0.7299	rp	-	53477817	HMDB0006317	-	-	28888.8	40110.7	55063.9	49702.4	23241.9	29966.7	211.593	237.97	190.919	280.087	215.274	220.232	11226.3	12292.2	17037	19606.5	12297.2	18343.8	520.689	222.141	1845.26	2262.38	2802.87	2285.53	11428.7	11441	11590.2	11374.1
C18_positive	MEDP0825	N-Cyclohexylformamide	N-环己基甲酰胺	Alcohol and amines	醇、胺类	Amines	胺类	C7H13NO	110.104	127.1	4.2581	M+H-H2O	19.8002	1	0.6716	rp	-	13017	HMDB0255105	-	C11519	13844.8	12368.3	14170.2	14877.2	12938.6	12385.3	12935.3	13786.9	15193.5	14237.1	14010.1	13838.1	12853.3	17856.8	11405.9	11014.2	12930.8	12300.1	13804.9	12262.1	14440.1	13682	14888.2	14994.7	22254.3	22495.5	22177	21767.8
C18_positive	MEDL01878	Methyl dioxindole-3-acetate	甲基-二氧吲哚-乙酸	Heterocyclic compounds	杂环化合物	Indole and Its derivatives	吲哚及其衍生物	C11H11NO4	222.076	221.069	4.133	M+H	4.33697	1	0.6675	rp	-	14033762	HMDB0038991	-	-	82330.6	71600.1	76000.5	89106.1	82267.4	77375.6	80456.4	79868.9	96961.9	84726.3	84144.2	77684.1	83300.6	103737	70659.4	71407.4	80260.3	70032.5	87260.3	77608.8	87921.8	89008.9	86314	90362.6	77590.3	78071.6	77230.7	77614.6
C18_positive	MEDP1166	PC(16:0/2:0)	PC(16:0/2:0)	GP	甘油磷脂类	PC	磷脂酰胆碱	C26H52NO8P	520.34	537.343	8.3536	M+H-H2O	0.640575	1	0.6632	rp	-	16759367	-	-	-	24853.6	21943	27021.8	23112.2	31297.4	27503.6	138042	152742	188951	126743	127494	123942	4797.2	6199.44	9647.11	7549.43	15809.5	30083.3	13779.1	25246.1	7440.93	8822.31	10200.3	9972.61	26921.7	27036.1	26849	27045.2
C18_positive	MEDP1434	Carnitine C4:DC	肉碱 C4:DC	FA	脂肪酰类	CAR	酰基肉碱	C11H19NO6	245.124	261.121	0.5499	M+H-H2O	5.0588	1	0.6298	rp	-	-	-	-	-	8623.11	8557.5	9661.81	8876.95	8877.83	8533	8244.6	10064.9	12201.3	8555.44	10227.8	8106.99	10986.8	10228.4	11923.6	10184.2	11947.7	11912.8	15496.3	12188	13313.2	16486.4	14439.4	14315.4	13730.2	14015.7	13907.7	13759.1
C18_positive	MEDP1574	3-Methyloxindole	3-甲基羟吲哚; 1,3-二氢-3-甲基-2H-吲哚-2-一	Heterocyclic compounds	杂环化合物	Indole and Its derivatives	吲哚及其衍生物	C9H9NO	130.065	147.068	5.2124	M+H-H2O	1.04625	1	0.6281	rp	-	150923	HMDB0304943	-	C02366	14644.3	13880.2	13732	16422.7	13955.3	14298.7	14197.4	15494.3	17967	19618.5	16286.1	13841.5	13434.5	16206.4	16357.8	11547.6	12986	12557.5	14851	14050.9	14181.3	14307.1	18666.5	16599.6	14437.5	14463	14703.6	14884.5
C18_positive	MEDP1221	PC(O-16:0/O-1:0)	PC(O-16:0/O-1:0)	GP	甘油磷脂类	LPC	溶血磷脂酰胆碱	C25H54NO6P	534.344	495.369	9.288	M+K	17.6867	1	0.6259	rp	-	-	-	-	-	3403.29	3377.51	3448.52	4206.02	3889.12	3675.92	5380.56	5338.27	5927.25	5277.1	5163.54	4905.11	4426.1	4140.69	3403.71	4032.47	4465.63	2850.06	4982.27	3677.6	5253	4590.81	5284.87	6460.82	4185.76	4083.22	4265.71	4217.88
C18_positive	MEDL02434	Diethyl glutarate	戊二酸二乙酯	Aldehyde,Ketones,Esters	醛、酮、酯类	Esters	酯类	C9H16O4	265.024	188.105	4.4094	M-H+2K	1.57608	1	0.5753	rp	-	13163	HMDB0059879	-	-	4133.77	3526.61	4475.66	4579.74	3934.84	3853.5	3701.86	4356.48	4329.96	4047.93	4681.02	4214.3	5154.44	6317.93	4106.9	3814.01	4243.81	3249.08	3715.35	3748.67	4603.53	4237.21	5927.63	5602.88	7821.64	7738.8	7634.67	7572.53
C18_positive	MADP0513	N-(2-Hydroxyethyl)nicotinamide	N-(2-羟乙基)烟酰胺	Alcohol and amines	醇、胺类	Amines	胺类	C8H10N2O2	167.087	166.074	4.3336	M+H	12.2173	1	0.5275	rp	-	72663	HMDB0254988	-	-	53242.7	45027.9	50130.4	57567.9	49968.8	48445.2	49615.7	45449.3	62570.6	51280	51649.9	49030.9	59130.1	73283.4	52002.6	54026.8	55264.9	45779.6	58651.4	49151.5	60162	58625.6	56478.1	61030.4	50778.2	51149	49393.7	50387.9
C18_positive	MW0126302	pyrazole	吡唑	Heterocyclic compounds	杂环化合物	Heterocyclic compounds	杂环化合物	C3H4N2	110.065	68.0374	3.2362	M+CH3CN+H	14.3576	1	0.5255	rp	-	1048	HMDB0256947	-	C00481	66953.6	57994.5	67359	79817.1	70489.3	67527	71437.3	72464.5	86009.4	72991.7	71007.6	67579.9	77632.7	95342.8	81744.4	68347.9	74359.7	58337.5	84202.8	67132.4	81365.2	83613.6	86601	80591	72712.3	72615.5	73043.8	72168.8
C18_positive	MW0012982	LPC(15:0/0:0)	1-十五烷酰基-sn-甘油-3-磷酸胆碱	GP	甘油磷脂类	PC	磷脂酰胆碱	C23H48NO7P	482.325	481.317	9.8205	M+H	2.44556	1	0.5144	rp	-	24779458	HMDB0010375	-	C04230	20851.4	19345.4	21739.8	19073.6	21660.1	23186.7	152278	179362	152392	125653	117172	131045	21705.6	22478.3	26060.7	26970.8	38187.3	42132.6	72378.1	96266.7	66869.3	57133.6	60845.2	60143.5	64699.4	65037	64463.4	64085.1
C18_positive	MEDP1343	LPC(0:0/18:3)	LPC(0:0/18:3)	GP	甘油磷脂类	LPC	溶血磷脂酰胆碱	C26H49NO7P	560.369	518.325	10.2336	M+CH3CN+H	19.5583	1	0.5036	rp	-	85735491	-	-	-	48698.1	43095.8	49004.1	34625.4	51878.6	51085	68977.6	67136	87730.5	70458.1	66627.9	59799.8	39820.1	53900.1	38682.1	38888.7	49000.6	44786.2	55916.2	47524.6	56038.1	56675.1	68535.3	69878.5	54540.4	53724.6	52761.5	53440
C18_positive	MW0153022	Lys-Ile-Val-Lys	-	Amino acid and Its metabolites	氨基酸及其代谢物	Small Peptide	小肽	C23H46N6O5	487.361	486.353	10.884	M+H	2.13785	2	0.9636	rp	-	-	-	170627	-	41979.4	40274.7	38071.1	52805.4	46796.6	43727.1	58383	70780.7	67457.9	58099	56606.8	48810.9	47213.9	62723.7	44643.3	43687	53999.4	39840.4	50341.5	51282.2	57579	55674.1	60358.2	62851.8	51769.7	51194.9	51563.5	51563
C18_positive	MW0110983	D-erythro-Sphingosine C-20	D-赤型鞘氨醇C-20	SL	鞘脂类	SPH	鞘氨醇	C20H41NO2	328.321	327.314	6.5391	M+H	0.408282	2	0.9567	rp	-	71684564	-	45095	-	202508	178680	187430	176510	177328	179887	1.07149e+06	1.17723e+06	1.2303e+06	1.18611e+06	1.25435e+06	1.20115e+06	104133	122916	108934	86399.3	115882	77164.2	1.857	63896.2	248553	275407	641450	276634	181454	182608	181756	182345
C18_positive	MW0006864	Dimethyl phthalate	邻苯二甲酸二甲酯	Benzene and substituted derivatives	苯及其衍生物	Benzene and substituted derivatives	苯及其衍生物	C10H10O4	195.065	194.058	5.9044	M+H	0.160839	2	0.9545	rp	-	8554	HMDB0251388	-	C11233	4863.65	3247.14	4486.31	3755.01	3291.46	5312.01	2489.6	3506.69	2851.77	2665.53	2215.95	2375.87	3420.17	3673.66	2689.91	3115.13	3243.71	2792.22	3374.61	3282.24	3611.72	4157.38	5400.21	4572.78	3478.69	3343.77	3360.98	3353.62
C18_positive	MW0144735	Ala-Ser-Ser-Thr-Lys	-	Amino acid and Its metabolites	氨基酸及其代谢物	Small Peptide	小肽	C19H36N6O9	493.266	492.254	4.5004	M+H	5.88098	2	0.9448	rp	-	-	-	264953	-	14117.6	12213.8	14328	14621	12674	13748.1	14191.1	14965.3	15796.8	13391.2	14097.5	14732.2	15142.8	19006.9	12659.7	13867.3	14221.9	11191.7	16754.6	12669.5	16255.4	15981.4	16988.3	16972.1	15384.3	14744.9	14540.8	14816.8
C18_positive	MW0013615	1-octadecanoyl-2-(9Z-octadecenoyl)-sn-glycero-3-phosphoserine	2-油酰基-1-硬脂酰基-sn-甘油-3-磷酸丝氨酸	GP	甘油磷脂类	PC	磷脂酰胆碱	C42H80NO10P	790.541	789.552	12.2366	M+H	5.31372	2	0.9383	rp	-	9547087	HMDB0010163	-	-	30269.5	29091.8	3995.57	57489.4	32909	6488.19	79978.4	67004.3	67009.5	75260.4	77325.2	69480.4	56724.1	48499.2	5887.24	29522	26453.9	20398.8	48686.1	35566.5	43468.1	62531.4	68855.7	82136.5	42968.7	36065.7	44687.5	46934.3
C18_positive	MW0011795	1-(1Z-octadecenyl)-sn-glycero-3-phosphocholine	1-(1Z-十八碳烯基)-sn-甘油-3-磷酸胆碱	GP	甘油磷脂类	PC	磷脂酰胆碱	C26H54NO6P	508.376	507.369	9.3182	M+H	5.04237	2	0.9315	rp	-	24779527	HMDB0013122	-	C04230	4175.65	3272.1	3095.27	3512.59	3517.23	3924.44	4307.86	5559.64	3764.13	3817.67	3342.83	3580.36	3764.41	4045.29	3721.69	3345.14	5456.97	5822.4	619.632	2160.98	881.859	1474.14	605.364	850.305	4410.31	4349.5	4448.69	4534.87
C18_positive	MW0125557	1-(tert-Butyl)-3-(2-((4-(diethylamino)butyl)amino)-6-(3,5-dimethoxyphenyl)pyrido[2,3-d]pyrimidin-7-yl)urea	N- [2-[[4-(二乙基氨基）丁基]氨基] -6-(3,5-二甲氧基苯基）吡啶基[2,3-d]嘧啶-7-基] -N'-(1,1-二甲基乙基尿素	Heterocyclic compounds	杂环化合物	Heterocyclic compounds	杂环化合物	C28H41N7O3	524.335	523.327	9.288	M+H	1.23173	2	0.9278	rp	-	1401	HMDB0245622	-	-	7485.73	7806.91	8464.32	8153.07	7350.86	7525.45	8751.66	9078.65	11870.6	8428.29	9171.89	7635.85	9673.06	11577.3	7503.62	8191.68	9232.23	7073.08	9175.05	7505.23	10193.4	8855.8	10812.1	10771	8292.36	8427.08	8150.11	8277.3
C18_positive	MW0012923	(R)-1-Octen-3-ol	（R)-1-辛烯-3-醇	Alcohol and amines	醇、胺类	Alcohols	醇类	C8H16O	111.117	128.12	3.5554	M+H-H2O	1.12313	2	0.9265	rp	-	18827	HMDB0031299	-	C14272	306.32	302.795	268.822	317.705	357.484	378.534	374.488	455.118	449.584	338.629	404.595	371.054	290.336	2508.63	277.984	297.237	314.791	244.858	305.48	272.29	205.078	403.969	540.165	459.528	2313.39	2337.42	2318.49	2300.88
C18_positive	MW0110917	N-(2-hydroxyethyl)icosanamide	花生四烯酸乙醇酰胺	Organic acid and Its derivatives	有机酸及其衍生物	Organic acid and Its derivatives	有机酸及其衍生物	C22H45NO2	356.353	355.345	7.7071	M+H	1.58767	2	0.9256	rp	-	3787294	HMDB0248559	-	-	9444.51	6542.4	6214.37	14413	14227.2	23517.6	32948.1	11510.7	42109.5	10303.4	8822	9603.58	40380.9	15704.8	41389.3	16462.2	25684.8	6921.56	22432.6	13199.4	32503.3	22048.1	28445.6	55780.8	28052.9	29070.8	28171.1	29704.8
C18_positive	MW0110610	11(12)-EpETrE-EA	11（12)-EpETrE-EA	Heterocyclic compounds	杂环化合物	Heterocyclic compounds	杂环化合物	C22H37NO3	364.285	363.277	5.5922	M+H	1.41102	2	0.9237	rp	-	16061183	HMDB0013652	-	-	6289.85	5701.42	6029.75	9130.93	5440.41	5413.73	57787.2	60138.1	57822.7	64572.2	63626.1	60391	22.403	100317	81346.2	80982.5	83202.9	11.35	91432.6	76418.3	87506.9	86876.7	12.598	85695.2	29454.6	30431.4	31057	30094.5
C18_positive	MW0108733	N-tetradecylcyclohexanecarboxamide	N-十四烷基环己烷甲酰胺	Alcohol and amines	醇、胺类	Amines	胺类	C21H41NO	324.326	323.319	6.8896	M+H	0.0754986	2	0.922	rp	-	53394586	-	-	-	5527.48	5323.88	5527.69	5357.48	5718.26	4680.24	27818.5	31052	30653.1	3065.76	29176.5	2586.51	280.853	908.711	239.197	1834.68	188.206	405.273	3088.67	888.209	3456.11	1771.61	4043.81	3494.38	3818.4	3739.51	3948.67	3890.07
C18_positive	MW0145298	Arg-Asp-Leu-Tyr-Ser	-	Amino acid and Its metabolites	氨基酸及其代谢物	Small Peptide	小肽	C28H44N8O10	653.326	652.318	2.8261	M+H	5.23889	2	0.9219	rp	-	-	-	264934	-	522.446	458.3	550.681	487.036	447.019	2.634	383.957	157.827	462.058	156.862	57.507	473.288	258.627	287.125	899.261	359.463	850.985	1973.8	211.791	121.115	227.542	220.733	103.619	183.89	1624.49	1457.01	1556.34	1542.18
C18_positive	MW0110858	5(6)-EpETrE-EA	5（6)-EpETrE-EA	Heterocyclic compounds	杂环化合物	Heterocyclic compounds	杂环化合物	C22H37NO3	364.285	363.277	5.2546	M+H	1.7302	2	0.9216	rp	-	16061181	-	36762	-	618.389	1401.32	2191.59	1965.54	989.83	1418.04	21392.1	22283.9	21761.5	26279.1	22475.3	23676.8	3597.38	5270.88	5669.76	6303.64	6940.26	6421.48	11880.8	10278.3	11871.3	10168.8	10469	10250	15328.9	15717.2	15141.8	15359.4
C18_positive	MW0150853	His-Asn-Ile	组氨酸-天门冬酰氨-异亮氨酸	Amino acid and Its metabolites	氨基酸及其代谢物	Small Peptide	小肽	C16H26N6O5	383.205	382.197	9.6543	M+H	1.87887	2	0.9213	rp	-	145455768	-	18529	-	1165.09	491.492	277.002	522.086	553.909	143.188	392.221	1734.08	843.021	2539.42	465.422	426.609	715.477	688.371	353.136	641.091	531.129	231.887	299.171	238.974	11101.5	1110.97	478.917	541.169	910.691	855.754	787.053	586.558
C18_positive	MW0149772	Gln-Phe-Asp	谷酰氨-苯丙氨酸-天门冬氨酸	Amino acid and Its metabolites	氨基酸及其代谢物	Small Peptide	小肽	C18H24N4O7	409.175	408.164	7.615	M+H	2.3261	2	0.9176	rp	-	145455170	-	18388	-	2858.56	2299.65	1850.82	2888.74	2775.54	1609.57	1162.44	5705.14	1993.01	3701.8	2646.11	2826.87	1666.88	3299.13	2246.18	2128.86	1286.28	2856.94	2952.21	4462.56	1755.54	1311.66	813.639	1756.56	2209.83	2158.21	2209.96	2122
C18_positive	MW0153010	Lys-Ile-Glu-Arg	-	Amino acid and Its metabolites	氨基酸及其代谢物	Small Peptide	小肽	C23H44N8O7	545.342	544.333	9.0271	M+H	7.79543	2	0.9172	rp	-	-	-	170353	-	1438.89	842.229	2134.32	1103.31	1900.34	1583.88	3646.68	6222.54	2967.76	3286.98	3227.12	2498.16	785.496	678.462	675.709	1077.68	2107.38	3408.52	5175.74	4920.61	1571.1	2283.28	2690.58	1885.14	3469.31	3447.33	3490.6	3590.49
C18_positive	MW0011920	PE-NMe(16:0/16:0)	1,2-Dipalmitoyl-sn-glycero-3-phosphoethanolamine-N-methyl	GP	甘油磷脂类	PE	磷脂酰乙醇胺	C38H76NO8P	728.523	705.531	10.642	M+Na	0.895252	2	0.9141	rp	-	9547031	HMDB0010567	-	-	8953.47	15453.4	22086.3	23825.6	22589.3	18033.1	7634.8	7160.33	19123.2	16469.5	15358.6	14754.4	6146.01	11698.3	15565.4	3544.4	13143.9	11163.1	3329.36	5778.46	10194.4	1670.05	6022.11	7121.91	13231.9	15510.7	16999.9	15967
C18_positive	MW0147817	-CP 47,497-C8-homolog-d7	-	Heterocyclic compounds	杂环化合物	Heterocyclic compounds	杂环化合物	C22H29D7O2	322.311	339.315	6.6617	M+H-H2O	2.85386	2	0.9136	rp	-	-	-	96643	-	30823.4	28427.7	31244	29290.6	27470.2	34533.8	167802	175436	179914	228178	180006	171605	19946.6	45725.3	41190.7	37643.9	32391.2	15808.9	83693	96495.1	149776	140505	105601	165570	43249.8	43728.8	44390.8	43601.9
C18_positive	MW0052451	Docosahexaenoic Acid-d5	二十二碳六烯酸-d5	FA	脂肪酰类	FFA	游离脂肪酸	C22H32O2	334.275	328.24	5.4096	M+H	9.09157	2	0.913	rp	-	71434198	-	96380	-	11684.2	9840.98	12753.7	11860.3	9179.16	10921.2	93843.1	91753.2	98287.2	96995.4	91216.6	96541.5	28719.5	34610.1	40865.3	32730.3	61383.1	105327	37406.6	67051.9	44309.6	51423.8	30157.9	51269.8	44240.2	44080.9	45257.1	44173.6
C18_positive	MW0168582	4-(Dimethylamino)azobenzene N-oxide	4-(二甲氨基)偶氮苯N-氧化物	Benzene and substituted derivatives	苯及其衍生物	Benzene and substituted derivatives	苯及其衍生物	C14H16N3O+	242.128	242.129	5.1369	M+H	1.11007	2	0.9125	rp	-	126960482	-	4085	-	8229.13	7732.53	8414.2	9327.44	8999.89	9051.25	8465.61	8680.72	10891.7	8578.58	8666.11	8743.85	8604.68	9982.27	6642.23	8045.57	8691.15	6743.36	9022.84	8303.87	10135.2	9263.32	10138.4	8882.41	9151.85	9426.06	9230.32	8894.23
C18_positive	MW0156323	R-4-benzyl-3-((R)-3-hydroxy-2,2-dimethyloctanoyl)-5,5-dimethyloxazolidin-2-one	R-4-苄基-3-(（R)-3-羟基-2,2-二甲基辛酰基)-5,5-二甲基恶唑烷-2-	Benzene and substituted derivatives	苯及其衍生物	Benzene and substituted derivatives	苯及其衍生物	C22H33NO4	398.227	375.241	8.7969	M+Na	10.6097	2	0.9119	rp	-	101804811	-	65464	-	16470	16022.4	16408.8	19074.1	18367.9	19660.1	18570.2	26520.3	22922.4	19069.1	19417.7	18064.9	18427.7	19252	16132.8	14980.2	18805	14943.2	19472	17741.9	19641	19214	21118.5	20478.7	17136.5	16775.5	16926	16877
C18_positive	MW0108165	Met-Lys-Lys	甲硫氨酰-赖氨酰-赖氨酸	Amino acid and Its metabolites	氨基酸及其代谢物	Small Peptide	小肽	C17H35N5O4S1	406.25	405.241	9.4713	M+H	2.12492	2	0.9104	rp	-	145457002	-	22833	-	3559.31	2782.58	3593.36	2962.2	2746.22	2912.53	23377.2	22954.8	23279.5	22559.3	20706.2	21251.3	573.008	964.116	6.628	508.819	1535.69	1472.53	10277.5	13705.3	12919.2	11123.1	13896.2	13408.5	4365.13	4471.91	4394.89	4184.14
C18_positive	MW0007493	N-[(1R,2S)-1-hydroxy-1-phenylpropan-2-yl]tetradecanamide	N-[(1R,2S)-1-羟基-1-苯基丙-2-基]十四酰胺	Benzene and substituted derivatives	苯及其衍生物	Benzene and substituted derivatives	苯及其衍生物	C23H39NO2	362.306	361.298	6.1428	M+H	1.16165	2	0.9082	rp	-	6610217	-	43432	-	846444	728372	774580	914069	742595	780618	5.27341e+06	5.41987e+06	5.20015e+06	5.87285e+06	5.68583e+06	5.74116e+06	2.17643e+06	2.64818e+06	2.07717e+06	1.89507e+06	2.71126e+06	1.87217e+06	2.49239e+06	2.31002e+06	2.51573e+06	2.53818e+06	2.32047e+06	2.54376e+06	1.66035e+06	1.69054e+06	1.6557e+06	1.63162e+06
C18_positive	MW0159058	Val-Leu-Asp-Phe-Glu	-	Amino acid and Its metabolites	氨基酸及其代谢物	Small Peptide	小肽	C29H43N5O10	622.314	621.301	11.8999	M+H	9.59813	2	0.9032	rp	-	-	-	264828	-	17747.5	16447.1	16888.2	20528.8	17478.8	25400.8	41507.7	32652.3	39536.6	28444.8	24548.5	21514.2	29549.9	36850.7	23143.6	26018	21821.4	21149.3	26408.4	28815.3	24963.1	44524.7	31419.8	47606	22011.6	17598.8	19899.9	20374.3
C18_positive	MW0156644	Ser-Arg-Ile-Lys	-	Amino acid and Its metabolites	氨基酸及其代谢物	Small Peptide	小肽	C21H42N8O6	503.334	502.323	10.884	M+H	9.67807	2	0.9019	rp	-	-	-	229227	-	4023.86	3448.18	4172.6	4073.63	4603.41	4351.86	4986.89	6541.28	5478.4	5385.57	4887.11	3601.77	4523.33	3500.2	4371.47	3624.96	3894.22	3170	3683.5	5005.73	4652.49	5939.91	4814.06	5055.42	3715.2	3805.46	3791.69	3413.62
C18_positive	MW0109173	Phe-His Zwitterion	-	Amino acid and Its metabolites	氨基酸及其代谢物	Small Peptide	小肽	C15H18N4O3	303.148	302.138	9.6998	M+H	12.783	2	0.9016	rp	-	146026578	HMDB0028997	-	-	11774.3	11344.7	14300	14438.5	13560	15080.9	15438.3	17782.7	22901.2	16577.9	14499.5	14063.1	15500.9	15990.6	10790.6	11492.8	14887.5	12475.4	17190.8	12577.6	15930	19188.6	19595	18719.4	13384.9	12931.5	13442.7	13080
C18_positive	ZINC43617340	Pipericine	（2E，4E)-N-(2-甲基丙基）十八碳-2，4-二烯酰胺	FA	脂肪酰类	Others	其他	C22H41NO	336.327	335.319	6.814	M+H	0.510384	2	0.8985	rp	-	9974234	-	-	-	5891	4519.89	4805.07	4513.06	5485.58	5703.11	24495.8	28834.7	25285.4	27635.5	23739.6	24073.1	3559.91	1266.11	759.797	731.825	1074.84	1002.85	10914.7	9700.9	9653.48	10273.1	10250.5	12439.7	3659.13	3822.23	3716.54	3486.27
C18_positive	MW0126399	Chinomethionat	甲硫磷	Others	其他	Medicine	药物	C10H6N2OS2	235	233.992	5.7604	M+H	2.57446	2	0.898	rp	-	17109	-	-	-	6.473	348.621	419.045	611.286	354.334	298.296	381.629	460.252	586.178	166.601	225.178	345.283	5266.63	3299.64	2773.44	3038.81	1857.35	351.868	4220.79	314.306	3748.43	3986.13	4490.73	3955.67	1750.51	1744.23	1751.34	1751.84
C18_positive	MW0155436	Phe4Cl-TyrMe-OH	-	Amino acid and Its metabolites	氨基酸及其代谢物	Small Peptide	小肽	C24H21ClN2O7	485.113	484.104	10.7482	M+H	2.659	2	0.8967	rp	-	-	-	65086	-	1.069	30.384	4.654	2.734	1.504	7.298	39.939	26.488	8.346	4.668	29.998	1.541	38.852	154.248	2.044	1.408	2.055	0.721	38.336	27.074	2.243	0.184	71.148	11.159	1259.69	1240.42	1258.39	1240.43
C18_positive	MW0054970	MG(0:0/18:2(9Z,12Z)/0:0)	2-Linoleoylglycerol	GL	甘油脂类	MG	单甘油酯	C21H38O4	355.285	354.277	8.9349	M+H	1.51934	2	0.8934	rp	-	5365676	HMDB0011538	-	-	493798	669525	492641	430768	401677	257042	360508	432451	480731	269474	550093	414427	484690	410748	495325	368444	485540	440383	226008	377286	513994	420151	583227	450445	386772	391068	343115	321061
C18_positive	MW0153110	Lys-Phe-Val-Leu-Val	-	Amino acid and Its metabolites	氨基酸及其代谢物	Small Peptide	小肽	C31H52N6O6	605.404	604.395	11.3995	M+H	1.79051	2	0.8933	rp	-	-	-	264638	-	1757.81	2230.3	1399.37	2781.91	1858.44	2241.16	1519.04	1986.36	1719.55	1719.34	1436.33	1277.51	1415.67	2843.35	1503.06	2166.99	2763.46	1647.71	1762.74	1482.18	1420.96	1510.85	1578.46	1630.82	2036.94	2416.6	2326.48	2336.14
C18_positive	MW0145522	Arg-Thr-Lys-Arg	-	Amino acid and Its metabolites	氨基酸及其代谢物	Small Peptide	小肽	C22H45N11O6	560.369	559.355	10.4762	M+H	9.98877	2	0.8929	rp	-	-	-	222053	-	155206	138703	147543	174503	169564	161163	213218	209620	247090	197933	208928	182723	159536	192203	142344	147311	159910	136015	190582	250254	207642	203845	244325	234156	175335	172914	167823	172358
C18_positive	MW0146364	Asp-Nap-OH	-	Amino acid and Its metabolites	氨基酸及其代谢物	Small Peptide	小肽	C22H18N2O8	439.114	438.106	4.133	M+H	0.833194	2	0.8928	rp	-	-	-	65338	-	47872.1	40679.3	41906	48254.7	45651.2	46403.4	43920.3	49217	50622.7	50413.7	51434.2	44889.9	49000.7	54846.2	40443.9	44748.9	47945.8	39753	51722	43600.8	48750.2	51844.1	47727.4	51607.6	44491.7	45532.1	44266.8	42453.1
C18_positive	MW0107590	Isopropyl dodecylfluorophosphonate	十二烷基氟膦酸异丙酯	Aldehyde,Ketones,Esters	醛、酮、酯类	Esters	酯类	C15H32FO2P	589.429	294.212	11.3995	2M+H	4.08715	2	0.8911	rp	-	24762154	HMDB0253378	-	-	19093.1	19241.5	19010.9	21306.7	21908.5	21877.3	24328.7	30059	30307.8	24324.1	22666.2	23867.9	20089.9	23961.2	20300.4	19538.5	36465.6	17394.5	21930.1	20296.8	24776.9	29890.3	28199.9	27524.4	22659.7	22302.2	22250	22000
C18_positive	MW0152882	Lys-Asn-Glu	L-赖氨酸-L-天冬酰胺-L-谷氨酸	Amino acid and Its metabolites	氨基酸及其代谢物	Small Peptide	小肽	C15H27N5O7	431.23	389.191	6.8446	M+CH3CN+H	12.4308	2	0.89	rp	-	145456594	-	18753	-	1646.83	1555.78	1446.35	1706.21	1557.66	1630.92	1507.8	1897.36	1762.79	1638.22	1765.85	1570.56	1483.83	2331.82	1344.54	1548.8	1382.33	1244.55	2168.46	1315.1	1848.04	1690.33	1907.01	1835.02	2023.93	2099.75	2069.74	2059.79
C18_positive	MW0159069	Val-Leu-Leu-Val-Val	-	Amino acid and Its metabolites	氨基酸及其代谢物	Small Peptide	小肽	C27H51N5O6	542.399	541.384	10.4762	M+H	10.6492	2	0.8895	rp	-	-	-	264445	-	2390.37	2403.81	1042.53	1066.61	1905.73	2413.75	1884.04	2205.39	3321.75	2168.34	1531.28	1200.57	2400.7	2815.41	2299.2	2245.95	2332.99	2183.43	2977.66	1542.29	2605.06	3084.21	4007.67	1251.23	2067.92	2151.55	2170.8	2163.82
C18_positive	MW0154729	Oleoyl Ethanolamide-d4	油酰乙醇酰胺-D4	FA	脂肪酰类	FFA	游离脂肪酸	C20H35D4NO2	330.337	329.323	7.4461	M+H	15.2138	2	0.888	rp	-	312636340	-	96544	-	54897.5	108285	56191.8	63481.6	52962.2	183592	105622	62206.9	177117	58107.6	59956.4	58425.7	245827	87842.4	144746	138664	196546	57970.8	165175	52403.1	268488	166137	228810	241261	176884	181103	179859	178903
C18_positive	MW0156950	Ser-Tyr-Asp-Glu	-	Amino acid and Its metabolites	氨基酸及其代谢物	Small Peptide	小肽	C21H28N4O11	513.18	512.176	7.7532	M+H	7.5456	2	0.8872	rp	-	-	-	231122	-	7668.84	13414.5	11268.5	8655.86	8685.16	5765.01	3848.34	6702.69	5867.92	5648.47	8161.5	4862.55	6747.53	7535.56	6838.95	6546.52	5192.41	6035.12	6045.35	6145.55	8408.9	6333.62	10667.8	6600.07	8694.96	8428.52	8426.19	8149.16
C18_positive	MW0149849	Gln-Tyr-Val	谷酰氨-酪氨酸-缬氨酸	Amino acid and Its metabolites	氨基酸及其代谢物	Small Peptide	小肽	C19H28N4O6	409.206	408.201	5.7298	M+H	3.13408	2	0.8856	rp	-	145455266	-	19319	-	20301.2	15900.2	18847.6	22252.4	16369.8	18744	18764.4	21316.4	21546.4	19994.9	17580.8	18459.4	21728	26370.1	20469.2	18116.9	20266.6	16199.2	22661.2	18356.8	21296.1	22459.2	26309.5	22437.4	20316.1	20909.3	20060.8	20365.6
C18_positive	MW0145452	Arg-Met-Met	L-精氨酰-L-甲硫氨酰-L-甲硫氨酸	Amino acid and Its metabolites	氨基酸及其代谢物	Small Peptide	小肽	C16H32N6O4S2	437.194	436.193	7.7532	M+H	14.4894	2	0.8856	rp	-	145453897	-	20926	-	173856	253300	298896	208272	231496	148692	127419	191892	165441	155272	198546	147895	146684	199767	162081	150119	124802	145907	169623	167640	209233	177937	248798	184213	199722	198009	199259	197273
C18_positive	MW0123196	4-Chloro-2-nitrobenzylalcohol	4-氯-2-硝基苄醇	Heterocyclic compounds	杂环化合物	Heterocyclic compounds	杂环化合物	C29H37N3O6	524.277	523.268	12.2366	M+H	1.38529	2	0.8851	rp	-	1959	HMDB0249542	-	-	12766.5	9963.93	11680	17957	16823	16845.4	1723.69	12325.5	3952.01	8631.73	8597.61	7353.28	2851.45	13574.8	8516.47	1862.02	6578.67	2248.91	14462.9	17804	18713.4	13053.7	8543.26	7372.37	9193.73	11385.5	7575.9	10794.7
C18_positive	MW0153048	Lys-Leu-Thr-Arg	-	Amino acid and Its metabolites	氨基酸及其代谢物	Small Peptide	小肽	C22H44N8O6	517.355	516.338	7.8442	M+H	14.8269	2	0.8831	rp	-	-	-	171413	-	12906.9	11099.3	11855.8	14208	12810.2	12349.1	14847.6	13168.6	17910.4	16147.4	14161.1	13408.4	14605.7	15094.3	11647.5	11389.5	12985.9	10803.6	15316.9	13360.7	15572.7	15381.8	15720.7	15954.3	13299.6	13332.1	13230.1	13320.5
C18_positive	MW0153665	Met-Ser-Phe-Thr-Phe	-	Amino acid and Its metabolites	氨基酸及其代谢物	Small Peptide	小肽	C30H41N5O8S	632.263	631.268	9.2961	M+H	15.0952	2	0.883	rp	-	-	-	264509	-	5164.68	5055.17	6835.35	6159.79	6996.62	6094.31	10978	9715.61	13611.8	12018.2	11444.7	9679.46	6220.18	7803.95	5090.05	6168.05	7663.54	5505.06	9790.5	7458.82	10658.1	9425.19	13505	12474.5	8469.05	8052.14	7581.9	8118.96
C18_positive	MW0147818	-CP 47,497-d11	-	Heterocyclic compounds	杂环化合物	Heterocyclic compounds	杂环化合物	C21H23D11O2	312.327	329.325	6.988	M+H-H2O	12.5457	2	0.8812	rp	-	-	-	96644	-	24789.2	21473.3	23272.8	23561.2	22226.1	20215.5	90752.8	101285	96104.1	100734	83017.3	93683.3	10331	19073.5	19338.7	18580.5	20689.1	3940.14	27081.3	26262.2	15196.3	14179.1	2.821	20878.1	15603	15665.4	15642.7	15635.1
C18_positive	MW0145509	Arg-Thr-Ala-Arg	-	Amino acid and Its metabolites	氨基酸及其代谢物	Small Peptide	小肽	C19H38N10O6	503.306	502.298	10.7027	M+H	4.03934	2	0.8807	rp	-	-	-	221893	-	10566	9146.84	10710.7	11574.1	11403.8	11194.4	11123.2	16084.2	15672.8	18991.7	12375.8	15825.5	11953.4	12311.8	9765.82	9396.74	10820.9	13613.1	12795	11511.2	13503.5	14426.3	14187.4	12404.8	11009.4	11095	11146.5	11066.4
[truncated: 3,386 more rows]
[truncated: 2 more columns]
