# Supplementary material for: Mechanism research on inhibition of gastric cancer in vitro by the extract of Pinellia ternata based on network pharmacology and cellular metabolomics
Source: Open Med (Wars). 2025 Feb 18;20(1):20241131. doi: 10.1515/med-2024-1131 (PMC11843166; doi:10.1515/med-2024-1131)
Supplement: Supplementary Table 5 [file med-2024-1131-s5.xlsx]

## Sheet: Sheet1
Index	Compounds	物质	Class I	物质一级分类	Class II	物质二级分类	Formula	Level	score	CAS	Control-H_vs_PTE-H	Control-B_vs_PTE-B	Control_vs_PTE	PTE-H1	PTE-H2	PTE-H3	PTE-H4	PTE-H5	PTE-H6	PTE-B1	PTE-B2	PTE-B3	PTE-B4	PTE-B5	PTE-B6	Ctrl-H1	Ctrl-H2	Ctrl-H3	Ctrl-H4	Ctrl-H5	Ctrl-H6	Ctrl-B1	Ctrl-B2	Ctrl-B3	Ctrl-B4	Ctrl-B5	Ctrl-B6	cpd_ID	Fold_Change
MW0111241	Palmitoleoyl Ethanolamide	棕榈油酰乙醇酰胺	FA	脂肪酰类	Others	其他	C18H35NO2	2	0.6783	94421-67-7	TRUE	TRUE	TRUE	1824.21	738.755	810.24	1190.19	1863.16	1620.09	4213.92	4877.99	15390.5	2264.63	6571.38	4037.39	42.215	66.468	107.145	65.802	99.228	170.964	122.058	57.58	103.959	58.602	44.709	68.064	-
MW0063564	C24:1 Sphingomyelin	N-神经酰基-D-赤型鞘氨醇磷酸胆碱	SL	鞘脂类	SM	鞘磷脂	C47H93N2O6P	2	0.9193	94359-13-4	TRUE	TRUE	TRUE	49976.1	55225.4	58266.6	51445.4	48633.5	48514.1	57275.7	50429.4	50912.3	46830.5	30505.1	20111	76600.3	69524.8	54875.9	82245.9	70119.8	48330.6	61750.2	68413.3	56913.7	61834.1	57510.9	79121.3	C00550	0.721666
MW0110701	20-HETE ethanolamide	20-HETE乙醇酰胺	Alcohol and amines	醇、胺类	Amines	胺类	C22H37NO3	2	0.7439	942069-11-6	TRUE	TRUE	TRUE	1300.31	1225.66	936.682	598.339	976.192	788.132	1527.44	4351.52	4371.51	4437.53	2929.56	2035.18	5.692	115.591	139.848	111.571	6.306	157.43	187.581	174.502	89.221	253.044	114.935	75.83	-
MW0009449	Phthalic acid	邻苯二甲酸	Organic acid and Its derivatives	有机酸及其衍生物	Organic acid and Its derivatives	有机酸及其衍生物	C8H6O4	2	0.9725	88-99-3	TRUE	TRUE	TRUE	113642	127709	217819	294093	124972	224518	135697	263080	330017	160744	277387	224385	83234.9	92381.4	85066.1	73246.8	73959.1	102634	94743.6	44624.1	66730.5	136572	92497.1	77884.2	C01606
MEDP1904	LPE(18:2/0:0)	LPE(18:2/0:0)	GP	甘油磷脂类	LPE	溶血磷脂酰乙醇胺	C23H44NO7P	1	0.8932	85046-18-0	FALSE	TRUE	TRUE	3345.88	3880.94	7430.35	3639.83	9633.36	4037.22	18444	22367.9	19639.2	18085.8	16162	39770.7	1832.38	2574.94	2124.93	2678.58	2354.75	9155.9	2638.37	11488.1	2514.61	2897.55	2203.55	2525.01	-
MW0169728	Pyridoxamine	吡哆胺	Heterocyclic compounds	杂环化合物	Heterocyclic compounds	杂环化合物	C8H12N2O2	1	0.5145	85-87-0	FALSE	TRUE	TRUE	6591.56	5719.87	5669.73	6804.07	5784.49	5970.66	5511.25	6629.18	6879.41	6007.65	5784.49	6207.8	7107.78	8105.47	6456.2	5971.99	6361.61	4814.17	7534.92	6400.38	6929.94	7734.85	8006.66	7164.04	C00534
MW0054320	Leukotriene B4 dimethylamide	白三烯 B4 二甲基酰胺	FA	脂肪酰类	Oxidized lipids	氧化脂质	C22H37NO3	2	0.9266	83024-92-4	TRUE	TRUE	TRUE	6108.66	5397.44	5999.36	6329.81	5177.53	5631.86	43329.7	49885.6	47473.3	49417.2	45423.4	48392.8	174.3	531.567	1369.65	58.144	1266.18	494.065	3.037	35902.8	10.631	22.848	32713.9	35163.1	-
MW0049216	Deoxycholic acid	脱氧胆酸	Bile acids	胆汁酸	Bile acids	胆汁酸	C24H40O4	2	0.7496	83-44-3	TRUE	FALSE	TRUE	12158.2	37859.4	5514.31	11215	9509.88	6440.53	7452.37	13320.4	9896.93	9963.01	9501.7	8114.17	36714.7	41810.6	31269.4	94462.4	39387.1	13248.8	32478.7	18671.4	19091.6	66845.1	28928.7	9257.69	C04483
MW0132598	3',4'-Dimethoxy-2'-hydroxychalcone	（2E)-1-(2-羟基-3，4-二甲氧基苯基)-3-苯基丙-2-烯-1-酮	Aldehyde,Ketones,Esters	醛、酮、酯类	Ketones	酮类	C17H16O4	2	0.721	82964-34-9 | 7478-65-1	FALSE	FALSE	TRUE	18356	16024.3	17215.7	23553.5	16918.6	18716.3	20101.7	18175.7	23219.1	19721.4	18805.6	18664.7	24089.9	27504.7	18769.7	18554.1	18598.9	17772.8	22199.9	17915.2	24372.8	22263.8	26094.2	25283.3	-
MW0126871	Tridemorph	三甲型	Heterocyclic compounds	杂环化合物	Heterocyclic compounds	杂环化合物	C19H39NO	2	0.9286	81412-43-3	FALSE	TRUE	TRUE	210823	198686	169281	190182	158934	187329	888593	872060	935583	953419	876121	882540	153679	2.372	109966	103820	162499	119859	9.4	23.564	262096	217706	618404	258705	C11285
MW0123716	Dinaciclib	丁那西利布	Heterocyclic compounds	杂环化合物	Heterocyclic compounds	杂环化合物	C21H28N6O2	2	0.802	779353-01-4	FALSE	TRUE	TRUE	5175.97	4825.93	4744.86	5880.48	4937.17	5298.39	4771.91	4363.21	5698.14	4832.36	4608.52	4323.78	6519.66	6526.97	5106.28	4931.67	3430.64	4312.44	6475.7	5145.08	6250.06	6590.54	6292.03	6428.98	-
MW0053902	1-O-Hexadecyl-2-acetyl-sn-glycerol	十六烷基乙酰甘油	GL	甘油脂类	DG	甘油二酯	C21H42O4	2	0.8889	77133-35-8	FALSE	TRUE	TRUE	17251.3	15812.7	13679.8	17644.9	16379	13090.8	14349.9	18405.1	21124	18310	17566.2	15963.2	8988.67	14950.2	10878	12823.9	15870.5	14940.9	12622.8	19320.2	9821.57	12740.4	10096.6	11664.8	-
MW0106413	Dicyclomine	双环胺	Others	其他	Others	其他	C19H35NO2	2	0.8327	77-19-0	FALSE	TRUE	TRUE	8926.56	8686.66	8327.67	10028.4	8558.83	9059.5	113824	69465.9	70833.2	71153.5	68043.2	67598.3	37.23	19.097	29810.1	29774.9	6.618	28951.7	7.689	10.626	31982.4	31201.7	7.038	31200.1	C06951
MW0111287	Sphinganine	鞘氨醇	SL	鞘脂类	SPH	鞘氨醇	C18H39NO2	1	0.8083	764-22-7	FALSE	TRUE	TRUE	69217.4	58732.7	62414.2	68175.7	61605.4	169993	106737	71830.6	190455	60671.4	55962.9	53049.9	199713	103192	129903	115969	160019	58801.5	140645	61095.7	224626	154457	186595	235852	C00836
MW0141372	13-Azaprostanoic acid	13-氮杂前列烷酸	FA	脂肪酰类	FFA	游离脂肪酸	C19H37NO2	2	0.8997	71629-07-7	FALSE	TRUE	TRUE	42322.5	46211.1	42172.4	50010	39351	38125.9	212604	227134	233500	257946	218613	250179	8.397	44268.2	42842.2	39318	50635.5	26339	62155.6	51629.8	57518.2	55825.2	61635	72783.3	-
MW0143778	6beta-(Dimethylamino)-3beta,5-dihydroxy-5alpha-pregnan-20-one	6beta-(二甲氨基)-3beta,5-dihydroxy-5alpha-preg--20-one	Aldehyde,Ketones,Esters	醛、酮、酯类	Ketones	酮类	C23H39NO3	3	0.7699	7144-27-6	FALSE	TRUE	TRUE	6686.05	6725.38	6563.9	6607.38	5860.55	6107.6	98518.8	102984	107054	104019	104834	105879	40.413	20.73	32360	32320.6	7.183	31428.2	8.933	11.697	34716.7	33869.3	7.642	33868.1	-
MW0007289	Halofantrine	卤泛群	Benzene and substituted derivatives	苯及其衍生物	Benzene and substituted derivatives	苯及其衍生物	C26H30Cl2F3NO	2	0.7771	69756-53-2	TRUE	FALSE	TRUE	6405.41	5840.33	5725.87	7500.45	5669.59	7022.94	6327.53	6302.21	7205.29	3367.46	6933.48	6642.97	4773.16	6166.2	4724.84	4364.48	4354.59	4842.57	5765.85	6032.03	5634.24	5421.86	5856.92	4925.85	-
MW0170017	Xanthine	黄嘌呤	Nucleotide and Its metabolites	核苷酸及其代谢物	Nucleotide and Its metabolites	核苷酸及其代谢物	C5H4N4O2	1	0.6217	69-89-6	FALSE	TRUE	TRUE	102592	92026.4	93081.9	108614	95446.6	98692.6	95221	107670	113748	111734	104874	106148	129320	142998	102972	99386.8	110972	93294.5	123118	106483	122761	106942	127646	124485	C00385
MW0124314	Himbacine	欣巴辛	Heterocyclic compounds	杂环化合物	Heterocyclic compounds	杂环化合物	C22H35NO2	2	0.9028	6879-74-9	TRUE	TRUE	TRUE	3478.33	3180.3	3019.52	3270.12	2839.97	2903.31	13685.4	16316.2	16791.2	17531.3	11472.6	13416.9	42.514	16.25	8.457	18.466	1.556	14.78	44.435	80.771	444.376	8.635	27.354	13.658	-
MW0111078	Linoleoyl ethanolamide	亚油酰基乙醇酰胺	Alcohol and amines	醇、胺类	Amines	胺类	C20H37NO2	2	0.9033	68171-52-8	TRUE	TRUE	TRUE	2908.61	2836.25	2711.66	2187.63	1537.39	4457.88	21155.6	21694.4	25170.1	25340.3	22230.6	22938.9	341.516	398.804	583.009	853.059	610.529	1055.7	5749.67	9313.58	1554.38	4365.1	7992.56	4794.61	-
MEDL00344	Glycyl-L-tyrosine	甘氨酸-酪氨酸	Amino acid and Its metabolites	氨基酸及其代谢物	Small Peptide	小肽	C11H14N2O4	1	0.8226	658-79-7	FALSE	TRUE	TRUE	51.312	0.525	53.652	46.143	0.634	0.813	728.504	735.391	0.548	707.461	9.375	603.539	2.009	1.289	1.679	1.78	3.679	5.85	3.497	3.417	1.307	2.155	2.187	1.856	-
MEDN0243	Pyridoxine	吡哆素	Heterocyclic compounds	杂环化合物	Heterocyclic compounds	杂环化合物	C8H11NO3	1	0.7319	65-23-6	FALSE	TRUE	TRUE	4943.02	3368.82	3886.26	3411.57	3019.16	4116.28	5974.89	5325.29	4754.34	5851.24	4876.94	1099.67	3395.95	2179.13	4202.73	3076.96	4091.41	6380.19	1132.82	716.324	971.478	190.673	437.111	4085.47	C00314
MW0148485	Isorescinnamine, dihydro-	异戊二胺，二氢-	Alkaloids	生物碱	Alkaloids	生物碱	C35H44N2O9	2	0.921	6335-49-5	FALSE	TRUE	TRUE	31431.1	48668	40904.5	50043.6	67629.8	33239.7	37516.9	121825	54299.3	110500	91012.1	80828.9	22762.3	70525.2	29666.1	32480.4	36697.9	35206.4	43041.5	51870	27726.1	50835.4	32324.7	35775.9	-
MW0108213	Methionine	L-蛋氨酸	Amino acid and Its metabolites	氨基酸及其代谢物	Amino acids	氨基酸	C5H11NO2S	1	0.9345	63-68-3	FALSE	TRUE	TRUE	1065.77	631.358	1266.89	850.596	941.416	706.876	2154.05	2031.82	2359.99	2209.72	2295.96	1949.37	160.509	741.893	1086.17	820.269	1132.61	1525.02	888.333	737.191	1248.24	296.253	932.844	1177.83	C00073
MEDP0125	Choline	胆碱	Tryptamines,Cholines,Pigments	色胺、胆碱、色素	Cholines	胆碱类	C5H14NO+	1	0.9494	62-49-7	TRUE	TRUE	TRUE	136231	125566	114628	152283	90046.6	103676	175459	167062	149092	136772	145441	146739	74798.4	76979.7	68315.2	70677.5	64255.5	53070.6	110708	88404.8	123256	128129	126783	128922	C00114	1.47447
MW0053857	Chimyl alcohol	1-O-十六烷基-sn-甘油；1-O-十六烷基甘油；桂皮醇；甘油十六烷基醚	GL	甘油脂类	MG	单甘油酯	C19H40O3	2	0.5122	6145-69-3 | 53584-29-5	TRUE	TRUE	TRUE	198.215	64.91	42.106	252.522	158.415	251.016	6565.61	6813.7	7202.13	8161.9	6143.26	6910.99	13.32	88.706	97.677	6.703	72.739	52.885	631.361	453.618	564.345	3.21	3.998	3.056	-
MW0009794	Sulfamethazine	磺胺二甲嘧啶	Benzene and substituted derivatives	苯及其衍生物	Benzene and substituted derivatives	苯及其衍生物	C12H14N4O2S	2	0.7239	57-68-1	FALSE	TRUE	TRUE	515.637	804.304	1197	986.383	1149.25	1197.25	420.783	448.301	305.75	351.783	301.604	397.795	1887.18	1732.89	1986.12	877.99	1060.04	987.74	1411.93	862.746	1692.18	1749.19	1045.91	1493.66	C19530
MW0125165	Methylthiouracil	甲基硫氧嘧啶	Heterocyclic compounds	杂环化合物	Heterocyclic compounds	杂环化合物	C5H6N2OS	2	0.6489	56-04-2 | 1123-10-0 | 91795-77-6	TRUE	TRUE	TRUE	8379.53	8032.84	7888.49	8853.42	9880.99	8993.55	9230.73	6427.69	12532	11003.7	11011.2	9700.68	9465.72	9901.26	12687	10881.1	12204.5	15453.4	18925.3	15881.8	18237	16606.3	17719.8	17256.8	C19265
MEDP1645	Benzamide	苯甲酰胺	Alcohol and amines	醇、胺类	Amines	胺类	C7H7NO	1	0.6222	55-21-0	FALSE	TRUE	TRUE	6854.31	5489.62	5360.74	6652.21	5891.11	6004.65	5783.47	4345.22	6010.49	5671.07	5150.2	3108.59	7091.71	8195.56	6227.09	5205.67	5708.16	4525.24	6982.35	5365.9	7232.82	6621.09	7966.82	7401.95	C09815
MW0003256	2-Methylbenzhydrol	邻甲基苯酚	Benzene and substituted derivatives	苯及其衍生物	Benzene and substituted derivatives	苯及其衍生物	C14H14O	2	0.7214	5472-13-9	FALSE	TRUE	TRUE	5878.49	4898.4	4433.42	6069.08	4500.01	4696.22	5212.86	4985.17	5877.36	5070.89	4977.9	5336.97	5938.05	7526.08	4984.73	5310.26	5095.15	4479.34	6737.34	5535.89	5932.25	6794.65	7600.73	6295.49	-
MW0169257	N-(2-Hydroxyethyl)heptadecanamide	N-(2-羟乙基)十七酰胺	Organic acid and Its derivatives	有机酸及其衍生物	Organic acid and Its derivatives	有机酸及其衍生物	C19H39NO2	2	0.8621	53832-59-0	TRUE	TRUE	TRUE	7905.21	7489.4	5542.86	7557.42	12984.5	6385.15	85897.1	43474.3	99526.7	55374.4	43980.3	53829.9	652.508	1308.05	1799.79	906.221	3044.96	2774.08	2674.06	9754.5	587.997	999.887	1495.45	1887.64	-
MW0148859	Echinocystic acid	棘囊酸	Organic acid and Its derivatives	有机酸及其衍生物	Organic acid and Its derivatives	有机酸及其衍生物	C30H48O4	2	0.8687	510-30-5	TRUE	TRUE	TRUE	104.958	117.937	117.343	85.275	96.743	85.22	760.559	820.06	849.515	685.319	687.992	861.818	7.702	4.503	7.635	4.16	6.314	5.444	6.939	1.168	5.778	4.987	7.613	7.271	C08942
MEDP1170	9-Octadecenal	9-十八烯醛	Aldehyde,Ketones,Esters	醛、酮、酯类	Aldehydes	醛类	C18H34O	2	0.5397	5090-41-5	FALSE	TRUE	TRUE	4955.73	5052.15	4517.78	4935	4926.08	4727.06	25646.2	26978.3	24707.7	28772	26861.3	24785.9	1002.23	1652.47	3766.86	3339.39	5145.57	8451.75	9538.8	14716.9	6732.85	7234	5.675	5511.56	-
MW0055293	Nervonic acid	神经酸	FA	脂肪酰类	FFA	游离脂肪酸	C24H46O2	2	0.8629	506-37-6	FALSE	TRUE	TRUE	11945.4	24211.7	11736.3	12595	11799.5	42042	23115.7	14850.7	39253.6	12580	11905.2	11779.6	61147.4	18652	33616.4	31455.7	45625.5	12693.6	35720.9	11440.1	60797.3	33757.3	50328.2	54450.1	C08323
MW0052998	gamma-Linolenic Acid	γ-亚麻酸	FA	脂肪酰类	FFA	游离脂肪酸	C18H30O2	1	0.6943	506-26-3	FALSE	TRUE	TRUE	1201.7	1221.46	951.842	1101.07	946.755	784.462	6292.37	7620.3	4872.16	4807.04	5233.33	7085.18	2662.11	602.751	245.545	385.041	376.553	417.379	612.819	406.163	503.023	467.554	794.305	486.91	C06426
MW0006085	Aspirin	乙酰水杨酸	Organic acid and Its derivatives	有机酸及其衍生物	Organic acid and Its derivatives	有机酸及其衍生物	C9H8O4	2	0.7273	50-78-2	TRUE	TRUE	TRUE	2221.16	2602.98	2503.84	2645.56	3284.62	2592.05	2941.93	3599.16	5359.35	3383.27	4265.97	2971.1	3105.59	2425.12	3979.32	4181.2	4080.12	5756.99	8048.86	5725.97	6372.99	9639.05	7277.51	6730.09	C01405
MW0015867	Arachidonoyl-N,N-dimethyl amide	N，N-二甲基花生四烯胺	FA	脂肪酰类	Others	其他	C22H37NO	2	0.9481	45280-17-9	FALSE	FALSE	TRUE	1.27046e+06	1.09727e+06	1.19037e+06	1.19044e+06	1.09259e+06	1.16889e+06	5.29003e+06	5.38498e+06	5.97941e+06	5.84755e+06	5.20235e+06	5.67847e+06	589.254	2.20945e+06	1.80402e+06	43.072	2.44683e+06	30.823	2.11524e+06	2.0403e+06	2.06184e+06	2.12926e+06	16.759	2.12679e+06	-
MW0055423	Virodhamine hydrochloride	盐酸维罗达明	FA	脂肪酰类	Others	其他	C22H38ClNO2	2	0.9325	443129-35-9	TRUE	TRUE	TRUE	85.579	181.378	136724	143.728	86.202	141.294	12666.5	13358.2	12306	15060.5	88081.7	15489.6	149227	240207	144157	125938	155463	141381	191300	158672	207454	222602	226377	186497	-
MW0001720	2-(((2-Ethylhexyl)oxy)carbonyl)benzoic acid	邻苯二甲酸 单(2-乙基己基)酯	Benzene and substituted derivatives	苯及其衍生物	Benzene and substituted derivatives	苯及其衍生物	C16H22O4	2	0.9431	4376-20-9	FALSE	TRUE	TRUE	26036	34399.8	61430.3	66393.8	54775.8	64931.5	34525.9	69581.1	59103.3	58648.6	67002.8	57836.3	26464.9	43459.8	32835.4	49049.4	35900.5	39174.9	27176.3	24619.9	24872.3	54596.5	26497.4	28535.3	C03343
MW0112276	2-Propanoylthiazole	2-丙酰基噻唑	Heterocyclic compounds	杂环化合物	Heterocyclic compounds	杂环化合物	C6H7NOS	2	0.7121	43039-98-1	TRUE	TRUE	TRUE	2515.28	2450.4	2355.26	2505.57	2842.38	2866.01	2816.22	2546.68	4024.04	3345.43	3334.76	3054.12	2933.96	2876.41	4008.94	3253.85	3756.49	4240.42	5498.26	4324.56	4561.1	5506.77	5100.81	4748.6	-
MADP0492	2-pyrimidine methanol	2-嘧啶甲醇	Heterocyclic compounds	杂环化合物	Heterocyclic compounds	杂环化合物	C5H6N2O	1	0.5867	42839-09-8	FALSE	FALSE	TRUE	9571.19	8218.93	9134.09	10708	9208.66	9395.31	9234.49	8140.48	12180.8	9469.69	9496.48	8900.68	12163	14159.4	9748.72	10661	10746.7	8591.33	10599.5	9860.63	11225.1	11443.1	9925.34	10945.6	-
MW0110342	Val-Glu	谷氨酸	Amino acid and Its metabolites	氨基酸及其代谢物	Small Peptide	小肽	C10H18N2O5	3	0.7891	424-59-9	TRUE	TRUE	TRUE	1490.14	1252.1	1306.5	1546.63	1361.92	1404.84	5085.53	4300.25	3195.92	3794.38	3361.89	3948.53	168.942	80.513	273.609	190.632	164.952	320.417	1342.77	918.032	1230.98	1417.68	1287.72	1160.54	-
MW0007640	Methoxamine	甲氧明	Benzene and substituted derivatives	苯及其衍生物	Benzene and substituted derivatives	苯及其衍生物	C11H17NO3	2	0.7984	390-28-3	FALSE	FALSE	TRUE	7552.13	7974.01	7125.51	9099.84	8350.74	8151.67	6391.26	7393.97	9003.84	7056.11	6689.69	7372.05	10179.8	9631.72	7249.73	8259.16	8823.55	11481.5	8759.78	7702.25	10437	6640.58	9174.02	9919.76	C07513
MW0011179	(3beta,22E)-26,27-Dinorergosta-5,22-dien-3-ol	-	Alcohol and amines	醇、胺类	Alcohols	醇类	C26H42O	3	0.7831	38788-81-7	TRUE	TRUE	TRUE	2741.25	2652.52	2724.8	2442.15	2495.78	2705.38	23710.3	25009	24916.5	24308.8	24765.8	27172.1	285.029	331.797	488.735	716.523	682.643	668.252	4809.53	7793.44	4617.87	2739.4	6691.28	6025.88	-
MW0103432	8-Hydroxyguanosine	8-羟基鸟苷	Nucleotide and Its metabolites	核苷酸及其代谢物	Nucleotide and Its metabolites	核苷酸及其代谢物	C10H13N5O6	2	0.6905	3868-31-3	TRUE	TRUE	TRUE	28453.8	27121	26389	26061.9	22882.5	22718.1	12710.9	13294.4	11740	14292.2	12612.5	11647.8	26899.5	29508.2	29727.7	29371.7	27614.1	32573.6	25277.9	19981.4	27304	24957.3	29065.9	28934.3	-
MW0157526	Thiothece-474	-	Others	其他	Others	其他	C41H58O2	3	0.5702	38647-31-3	FALSE	TRUE	TRUE	28899	24672	22675.8	26871.3	25031.4	22033.2	22150.9	22608.6	25645.7	23244.4	25969.4	22189.3	33040	34486.1	22998.7	26421.8	24878.3	22363.7	30518.3	22354.6	28315.9	30856	28240.3	32163.7	-
MW0013009	2-azaniumylethyl (2R)-2-[(9Z)-octadec-9-enoyloxy]-3-(stearoyloxy)propyl phosphate	2-氮胺基乙基 (2R)-2-[(9Z)-octadec-9-enoyloxy]-3-(stearoyloxy)丙基磷酸酯	GP	甘油磷脂类	PE	磷脂酰乙醇胺	C41H80NO8P	2	0.9448	383907-18-4	FALSE	TRUE	TRUE	16158.5	5493.89	15588.1	15662.1	17543.2	9090.9	36307.3	26251.9	53449.5	39770.8	46871.6	57132.3	16867.1	21352.3	9207.35	7804.77	26653.1	15383.6	5992.04	6363.34	14752.2	7581.48	18898.6	16941.2	-
MW0009348	(+)-Penbutolol	(+)-喷丁洛尔	Benzene and substituted derivatives	苯及其衍生物	Phenolics	苯酚类	C18H29NO2	2	0.8107	38363-41-6	FALSE	TRUE	TRUE	1.44119e+06	1.27034e+06	1.34016e+06	1.6519e+06	1.41809e+06	1.45956e+06	1.43095e+06	1.35051e+06	1.56791e+06	1.39888e+06	1.41488e+06	1.34785e+06	1.70081e+06	1.87117e+06	1.42187e+06	1.39051e+06	1.58478e+06	1.27199e+06	1.59896e+06	1.30206e+06	1.5996e+06	1.72181e+06	1.87175e+06	1.73785e+06	-
MW0160374	N-(indole-3-acetyl)-L-leucine	N-(吲哚-3-乙酰)-L-亮氨酸	Organic acid and Its derivatives	有机酸及其衍生物	Organic acid and Its derivatives	有机酸及其衍生物	C16H20N2O3	3	0.7458	36838-63-8	FALSE	FALSE	TRUE	18600.6	15124.3	16737.1	19732	17091.9	17604.4	18807.2	18104.1	19908.9	17948.8	19693.6	16557.3	20377.4	22107.7	16876.7	18160.1	19662.1	16779.5	23578.6	17192.3	18463.7	21070.7	20118.7	21808.6	-
MW0125873	Nomifensine maleate	马来酸诺米芬新	Benzene and substituted derivatives	苯及其衍生物	Benzene and substituted derivatives	苯及其衍生物	C20H22N2O4	2	0.8022	32795-47-4 | 24524-90-1	FALSE	TRUE	TRUE	44.88	24.317	27.337	31.706	20.554	21.992	13.261	13.009	4.106	11.753	13.126	15.214	24.944	119.565	52.509	25.733	34.26	20.007	25.007	34.52	41.069	51.05	39.071	48.284	-
MEDP0618	Carnitine-2-methyl-C4	2-甲基丁酰肉碱	FA	脂肪酰类	CAR	酰基肉碱	C12H23NO4	1	0.92	31023-25-3	TRUE	TRUE	TRUE	2155.75	1871.62	1978.56	1958.82	1917.01	2024.52	94.484	11079.7	145.912	97.481	120.838	30.794	2934.59	3521.57	3332.01	3439.05	2989.51	4356.1	36703.8	27807.8	32795.6	32889	35213	35015.9	-
MW0007841	Monoisobutyl phthalate	邻苯二甲酸单异丁酯	Aldehyde,Ketones,Esters	醛、酮、酯类	Esters	酯类	C12H14O4	1	0.8542	30833-53-5	FALSE	TRUE	TRUE	3167.69	2592.02	4160.93	2476.67	3144.14	3233.44	918.585	1516.36	1018.8	780.492	1107.73	666.082	3974.46	3735.7	3385.88	3547.14	3671.44	3596.91	4260.34	3363.27	4662.24	5150.61	3784.01	4296.94	-
MW0138932	Methoxsalen	花椒毒素	Heterocyclic compounds	杂环化合物	Heterocyclic compounds	杂环化合物	C12H8O4	2	0.6627	298-81-7	FALSE	TRUE	TRUE	97.025	23.851	21.73	69.302	30.103	103.457	359.007	41.632	501.556	71.448	85.494	30.399	1436.89	104.014	602.115	526.708	1311.17	31.501	1101.46	34.479	1770.32	1017.71	1807.48	1299.06	C01864
MW0150782	Hexadecasphinganine	鸟嘌呤六水合物	SL	鞘脂类	SPH	鞘氨醇	C16H35NO2	3	0.5568	28457-97-8	FALSE	FALSE	TRUE	368984	292510	343523	423499	356695	440070	355906	578848	633443	329861	357321	373032	548461	516119	508479	428079	508820	284783	670965	385174	650603	588647	555554	606187	-
mws0120	Choline Alfoscerate	sn-甘油-3-磷酸胆碱	GP	甘油磷脂类	PC	磷脂酰胆碱	C8H20NO6P	1	0.9531	28319-77-9	TRUE	TRUE	TRUE	51071.7	75467.4	83348.4	54730.3	105253	100307	116652	114730	58292.9	181118	142251	158770	62009.1	60494	50599.5	56369.4	21062.1	11824.8	76888.7	14558.9	88639.2	75126.5	79665.9	88050	C00670	1.81236
MW0014099	beta-Elemolic acid	β-榄香酸	Organic acid and Its derivatives	有机酸及其衍生物	Organic acid and Its derivatives	有机酸及其衍生物	C30H48O3	2	0.6274	28282-54-4	FALSE	TRUE	TRUE	56549.7	8445.61	51764.5	36479.5	50137.8	52909.7	62994.4	3599.42	3203.17	58923.2	3466.54	2889.62	58187.7	71286.2	53004.4	48821.4	57686.2	49896.7	67756.6	36952	59076.2	47900.9	58084.8	59054.4	-
MW0144074	8-iso Prostaglandin F1a-d9	-	Hormones and hormone related compounds	激素及激素相关物质	Hormones and hormone related compounds	激素及激素相关物质	C20H27D9O5	2	0.6854	26771-96-0	TRUE	TRUE	TRUE	71052.6	62897	33041.9	62151.9	63408.9	58279.2	90003.3	102264	170480	116111	116058	134441	621275	685704	555872	555215	579721	539864	633639	595337	596377	581820	540341	581791	-
MW0125279	N-(14-Methylhexadecanoyl)pyrrolidine	N-(14-甲基十六烷基)吡咯烷	Alcohol and amines	醇、胺类	Amines	胺类	C21H41NO	3	0.8002	260058-83-1	TRUE	TRUE	TRUE	12402	10913.2	14233.4	11620.9	11651.7	13499.6	85915.3	76989.7	81315.7	91324.3	76160.6	91826.4	1367.17	2070.32	1580.66	1414.51	3331.54	5251.04	1903.71	6298.34	2959.71	1738.6	1621.59	2845.34	-
MW0110759	L-threo-Sphingosine	L-苏式-鞘氨醇C-18	Alcohol and amines	醇、胺类	Alcohols	醇类	C18H37NO2	2	0.9343	25695-95-8	TRUE	FALSE	TRUE	2320.83	3252.91	2368.34	2560.16	3381.08	3232.23	3845.74	5457.29	5839.03	5563.64	5425.69	4845.55	5240.73	4987.96	5444.39	5256.21	5778.47	8159.36	7893.3	5562.13	6305.4	4909.14	4627.26	6038.46	-
MW0063662	Stearoylcarnitine	硬脂酰肉碱	FA	脂肪酰类	CAR	酰基肉碱	C25H49NO4	2	0.9323	25597-09-5	FALSE	TRUE	TRUE	3642.38	3185.77	3139.75	3321.17	2590.66	2902.32	8104.43	7867.93	10526.4	10177.9	8085.97	9310.43	3076.4	3202.39	4271.93	4613.04	2832.41	5308.86	18780.1	15541.2	16848.3	20880.2	24170.8	20691.2	-
MEDP0401	5'-Deoxy-5'-(Methylthio) Adenosine	5-脱氧-5-甲硫腺苷	Nucleotide and Its metabolites	核苷酸及其代谢物	Nucleotide and Its metabolites	核苷酸及其代谢物	C11H15N5O3S	1	0.9574	2457-80-9	TRUE	TRUE	TRUE	33316.6	39761.9	42833.5	44559.5	53106	37966	40481.2	37759.6	54478.1	46735.3	53090.8	47446.3	15951.8	20127.9	24799.9	20320.3	28198.4	41009	26374.3	20107.5	18294.1	20288.1	22758.4	19277.9	C00170
MEDTP01677	FFA(12:1)	顺-5-十二碳烯酸	FA	脂肪酰类	FFA	游离脂肪酸	C12H22O2	2	0.5518	2430-94-6	FALSE	TRUE	TRUE	7.35	5.61	9.592	8.138	7.632	12.915	9.469	3.604	5.612	3.284	3.466	1.521	11.601	31.226	5.541	8.681	9.964	6.237	7.738	9.313	12.171	12.837	10.899	11.949	-
MW0145220	Arachidonic Acid methyl ester-d8	花生四烯酸甲酯-d8	FA	脂肪酰类	Others	其他	C21H34O2	2	0.8763	19245-55-7	TRUE	TRUE	TRUE	15618	15373.8	15638.1	16219.3	14448.3	13639.2	105736	107174	109534	110913	102823	107699	5451.79	10272.1	12358.2	11385.4	14024.1	8176.36	8182.48	11639.2	1355.2	4793.73	1854.9	1808.82	-
MW0011897	PC(8:0/8:0)	PC(8:0/8:0)	GP	甘油磷脂类	PC	磷脂酰胆碱	C24H48NO8P	2	0.7079	19191-91-4	TRUE	FALSE	TRUE	5612.34	6016.37	3390.78	9602.38	8672.55	8960.53	2179.15	5342.74	5713.95	3968.77	2709.17	4057.52	5450.54	4899.72	3886.91	1607.3	4740.63	373.774	2887.06	7006.37	3698.26	3444.02	1253.21	3563.2	-
MW0063380	Palmitic monoisopropanolamide, (R)-	R-棕榈酰基-(2-甲基）乙醇酰胺	FA	脂肪酰类	Others	其他	C19H39NO2	2	0.9206	179951-56-5	FALSE	TRUE	TRUE	177.036	162.135	84.649	59.262	158.821	63.238	1786.53	2454.14	1987.73	957.934	1162.64	1045.28	97.857	59.708	106.861	89.122	61.391	114.876	125.08	116.93	43.555	136.658	57.107	37.81	-
MW0108795	N-Heptanoylhomoserine lactone	N-庚酰基高丝氨酸内酯	Aldehyde,Ketones,Esters	醛、酮、酯类	Esters	酯类	C11H19NO3	2	0.8027	177158-20-2	FALSE	FALSE	TRUE	3.803	11.527	4.26	4.009	3.364	12.202	22.499	5.969	11.412	8.741	13.747	11.125	2.536	4.476	4.535	3.012	2.067	6.202	7.051	5.953	8.355	10.828	4.05	1.706	-
MW0157398	Terpendole E	三萜E	Heterocyclic compounds	杂环化合物	Heterocyclic compounds	杂环化合物	C28H39NO3	3	0.7742	167427-23-8	FALSE	TRUE	TRUE	58234.2	50262.8	53404.4	55650.4	55878.4	60913.5	89669.7	104219	90940.8	80695.4	70650.8	79011.1	47164.1	44712	48870.1	49632.1	73501.1	85172.5	46315.1	52714.8	40172.1	35279.3	37635.9	36874.6	C20536
MW0063393	S-1 Methanandamide	S-1甲酰胺	FA	脂肪酰类	Oxidized lipids	氧化脂质	C23H39NO2	2	0.9017	157182-50-8	TRUE	TRUE	TRUE	3063.09	2895.16	2695.14	2756.29	2826.85	2560.73	15696.7	16423.8	17579.7	19110.1	17580.7	22366.1	45.838	23.925	9.119	19.91	9.181	9.005	47.91	87.086	479.121	3.753	29.493	21.851	-
MW0055326	N-methyl arachidonoyl amine	N-甲基花生四烯胺	FA	脂肪酰类	Others	其他	C21H35NO	2	0.9108	156910-29-1	FALSE	TRUE	TRUE	191263	195446	184419	211273	187416	190919	920234	919593	969178	960925	853689	879734	99350.3	173036	183287	193327	190495	199838	140637	150191	286589	297445	322340	344767	-
MW0111175	BQ-788	BQ-788	Amino acid and Its metabolites	氨基酸及其代谢物	Small Peptide	小肽	C34H50N5NaO7	2	0.8915	156161-89-6	TRUE	TRUE	TRUE	346.433	589.027	807.641	504.819	547.883	521.415	5008.3	6790.3	5733.56	5405.98	7335.91	6068.02	2747.83	2972.87	2666.28	3119.64	4257.23	3426.26	15510.4	17826	14974.9	15435.7	14503.8	15620.5	-
MW0005121	4-Hydroxyphenylpyruvic acid	4-羟基苯基丙酮酸	Benzene and substituted derivatives	苯及其衍生物	Benzene and substituted derivatives	苯及其衍生物	C9H8O4	2	0.8362	156-39-8	FALSE	FALSE	TRUE	189859	227295	184661	162164	225189	172494	196265	284883	217069	188721	179640	134870	273181	268175	141992	201924	189785	214158	241289	223260	242072	263920	236510	263967	C01179
MEDP0594	Dihydroactinidiolide	二氢猕猴桃内酯	Aldehyde,Ketones,Esters	醛、酮、酯类	Esters	酯类	C11H16O2	1	0.7234	15356-74-8	FALSE	TRUE	TRUE	15.089	14.788	12.643	17.471	16.057	18.941	12.252	6.42	13.256	13.118	8.27	9.728	21.382	55.015	18.356	15.387	18.294	19.749	15.707	21.992	23.7	22.958	24.717	21.41	-
MW0111149	Dihomo-gamma-linolenoylethanolamide	8，11，14-二十碳三烯酰乙醇酰胺；N-(8Z，11Z，14Z-二十碳三烯酰基)-乙醇酰胺	Alcohol and amines	醇、胺类	Amines	胺类	C22H39NO2	2	0.9252	150314-34-4	TRUE	TRUE	TRUE	15272.5	13063.8	13651.4	15001	12272.5	11209.3	49480.7	53765	45569.1	49867.4	50052.9	51065.8	6036.21	2862.16	7432.51	7086.68	11430.4	11085.6	20026.7	29823	9840	15935.3	9044.26	16411.8	C13828
MW0168263	Phosphite	亚磷酸盐	Others	其他	Metal, Non-metal and related compounds	金属、非金属及相关物质	H3O3P	3	0.7938	14901-63-4	TRUE	TRUE	TRUE	53953.7	54316.8	54921.6	59694.2	63280	61392.8	63420.9	60984.6	87040.6	68601.2	74682.8	63258.5	66347.3	63767.9	83970.6	75027.3	85808.7	99223.4	119031	97418.1	105164	112213	112570	110065	-
MW0169367	L-Proline	L-脯氨酸	Amino acid and Its metabolites	氨基酸及其代谢物	Amino acids	氨基酸	C5H9NO2	1	0.9478	147-85-3	TRUE	FALSE	TRUE	36594.5	42593.5	48327.8	50090.5	26729.3	37271.7	20953.9	18944.9	13622	17638.8	14701.6	17839.6	27385.1	29147.8	15278.9	19713.3	9450.12	10257.5	10518	6449.09	19517.6	17067	19016.8	18060.8	C00148
MW0103557	Flavin adenine dinucleotide	核黄素-5'-腺嘌呤二磷酸	Nucleotide and Its metabolites	核苷酸及其代谢物	Nucleotide and Its metabolites	核苷酸及其代谢物	C27H33N9O15P2	1	0.8313	146-14-5	FALSE	FALSE	TRUE	4026.45	3514.91	3910.05	3488.33	3511.18	3116.67	3986.89	4284.11	2973.22	3732.26	2976.03	3675.22	2945.92	2709.51	3291.26	2833.8	3078.51	4577.51	2886.9	3391.05	2867.47	3295.81	3387.96	2900.33	C00016
MW0009981	Trihexyphenidyl	苯并噻吩基	Benzene and substituted derivatives	苯及其衍生物	Benzene and substituted derivatives	苯及其衍生物	C20H31NO	2	0.9254	144-11-6 | 40520-25-0	FALSE	TRUE	TRUE	7687.84	6594.14	7969.03	7083.17	6454.19	4065.64	67973.7	69116.8	72073.7	73623.4	63253.9	65979.7	6008.28	5687.56	7396.88	7052.62	11375.5	9.393	9969.06	29679.8	19577.9	15858.8	17995.3	13.798	C07171
MW0169792	N-[(2R)-1-Hydroxypropan-2-yl]hexadecanamide	N-[(2R)-1-Hydroxypropan-2-yl]hexadecanamide	FA	脂肪酰类	Others	其他	C19H39NO2	2	0.9143	142128-47-0	TRUE	TRUE	TRUE	21301.7	17337.4	37775.4	21877.7	18829.3	20261	213113	115886	225159	122528	117615	121888	8536.48	13475.5	14201.3	15475.3	19196.1	6812.19	12766.7	15956.1	4262.51	6449.76	2756.59	2437.23	-
MW0152160	(R)-3-Amino-3-phenylpropanoic acid	(R)-3-氨基-3-苯基丙酸	Aldehyde,Ketones,Esters	醛、酮、酯类	Esters	酯类	C9H11NO2	3	0.9301	13921-90-9	FALSE	TRUE	TRUE	4926.03	4807.52	9230.15	5429.47	9074.85	4963.9	10276.6	9486.59	10526.2	10403.1	14876.6	9850.76	4586.83	4890.03	3968.71	3940.95	4449.87	4441.63	7493.5	6358.69	11016.1	6686.7	6575.45	8546.4	C20487
MW0006009	Alprenolol	阿普洛尔	Benzene and substituted derivatives	苯及其衍生物	Phenolics	苯酚类	C15H23NO2	2	0.9373	13655-52-2	TRUE	TRUE	TRUE	24842.9	24708.7	25577.6	30110.7	28205.4	27755.8	18622.2	27804	26026.7	22051.1	26019.3	18878.4	37401.1	40367.4	32315.2	30110.7	33879.5	31232.6	41889.8	30499.7	33009.5	43499.5	35878.1	42247.4	-
MEDN0460	N8-Acetylspermidine	N8-乙酰亚精胺	Amino acid and Its metabolites	氨基酸及其代谢物	Amino acid derivatives	氨基酸衍生物	C9H21N3O	1	0.6537	13431-24-8	FALSE	TRUE	TRUE	18.983	65.485	815.457	11.519	69.558	2.813	433.232	442.574	464.82	427.029	522.204	404.25	8.506	23.875	26.171	26.824	11.398	2.724	19.811	7.46	16.886	23.122	5.653	36.28	C01029
MW0055234	N-acetylsphinganine	N-乙酰鞘氨醇	SL	鞘脂类	SPH	鞘氨醇	C20H41NO3	2	0.926	13031-64-6 | 26561-61-5	FALSE	TRUE	TRUE	187841	187058	186919	192589	173600	159345	1.28881e+06	1.34203e+06	1.35475e+06	1.38254e+06	1.28306e+06	1.33743e+06	192676	242589	161250	127893	171534	114223	228594	94582.6	367921	407672	949508	409488	-
MW0056747	Palmitoyl Serinol	棕榈酰丝氨醇	FA	脂肪酰类	Others	其他	C19H39NO3	2	0.9233	126127-31-9	FALSE	TRUE	TRUE	40.837	51101.8	48.767	94407	36.444	9.693	207.284	116.087	436.625	514.28	130.391	223.52	40386.7	39902.6	38689.7	39363.2	37764.7	40384.2	85571.3	43010.5	45325.4	63679.5	44249.1	40121.7	-
MEDN0682	Octadecanamide	硬脂酰胺	Alcohol and amines	醇、胺类	Amines	胺类	C18H37NO	1	0.9097	124-26-5	TRUE	TRUE	TRUE	1635.61	1418.54	1554.63	1430.48	1379.64	1511.07	9103.6	9231.95	9454.66	9843.64	9797.82	8968.56	2.856	2.554	3.453	0.927	377.028	1.591	4.489	1.375	2.69	158.419	2.501	0.862	C13846
MW0053741	Glyceryl monostearate	单硬脂酸甘油酯	GL	甘油脂类	MG	单甘油酯	C21H42O4	2	0.9451	123-94-4 | 31566-31-1 | 22610-63-5 | 83138-62-9 | 85666-92-8 | 342394-34-7	FALSE	TRUE	TRUE	58348.9	59169.7	51913.4	59026.1	59101.9	54820.6	57073.4	75268.6	82996.5	69888.7	70538.9	63095.1	33043.4	56072.2	46305.8	46175.6	55359.6	56120.4	46801.6	73233.4	45182	62516.7	48718.8	57594.4	-
MW0111288	Sphingosine	鞘氨醇	SL	鞘脂类	SM	鞘磷脂	C18H37NO2	1	0.795	123-78-4	TRUE	TRUE	TRUE	537.811	500.737	502.665	537.555	513.176	494.651	2759.38	3156.72	2815.82	3022.63	2858.66	3004.71	0.527	0.054	0.25	0.281	1.19	0.48	0.278	0.559	0.57	0.582	0.564	0.343	C00319	3646.44
MW0008588	N,N-dimethylsphingosine	N，N-二甲基-4-烯氨酸	SL	鞘脂类	SPH	鞘氨醇	C20H41NO2	2	0.9464	122314-67-4	TRUE	TRUE	TRUE	57889.8	54288	63191.5	54351.1	52486.5	54582.4	151998	157901	163174	164140	165466	160320	7163.65	17993.6	21647.7	19943.6	24565.7	14322.4	14329.4	20381.2	2373.61	8397.11	3249.2	3168.47	C13914
MW0108274	Methyl hippurate	2-苯甲酰胺基乙酸甲酯	Aldehyde,Ketones,Esters	醛、酮、酯类	Esters	酯类	C10H11NO3	2	0.687	1205-08-9	FALSE	TRUE	TRUE	1676.49	1232.58	766.495	1628.73	1392.47	1265.28	4322.01	4081.12	4060.99	3973.89	3976.64	3727.63	798.876	1085.24	982.673	711.838	1098.85	1499.64	2614.22	2319.34	1793.76	2175.22	1998.08	2444.37	-
MW0054292	Lauroyl diethanolamide	月桂酸二乙醇酰胺	FA	脂肪酰类	Others	其他	C16H33NO3	2	0.8436	120-40-1	FALSE	FALSE	TRUE	3658.02	2597.07	3070.94	3573.23	3272.54	4192.01	3223.97	5424.54	6092.52	3226.73	3325.25	3491.16	4928	4777.72	5019.47	3841.81	4521.51	2556.35	5686.91	3396.55	5770.24	5237.63	5577.06	5505	-
MW0013571	Ethylmethylacetic acid	2-甲基丁酸	Organic acid and Its derivatives	有机酸及其衍生物	Organic acid and Its derivatives	有机酸及其衍生物	C5H10O2	2	0.5108	116-53-0	TRUE	FALSE	TRUE	18024.8	28772.2	16800.6	23669.9	17371.5	18350.3	14949.6	17101.5	15661.5	21210.5	15474.3	14311.7	8343.89	13447.7	11856.3	12703.5	3193.41	16405.1	16308.6	14082.1	4633.08	14728.5	14444.3	17401.3	C18319
MW0127108	Methamidophos	甲胺磷	Alcohol and amines	醇、胺类	Amines	胺类	C2H8NO2PS	2	0.8313	115182-35-9	FALSE	FALSE	TRUE	20813.9	21831.2	19189.8	21770.5	18823	18936.5	17619.6	19696.1	21448.8	20809	18053.6	17645.2	22049	23667	20661.4	21974.2	23896.2	17439	23603.5	18467.7	20781.2	21165.8	20702.7	22580.9	C18667
MW0111232	n-Oleoylethanolamine	正油酰乙醇胺	Alcohol and amines	醇、胺类	Amines	胺类	C20H39NO2	2	0.9365	111-58-0	TRUE	TRUE	TRUE	12814.1	11484.8	10957.8	11253.8	9017.21	7932.67	67981.2	70753.7	71617.8	71960.2	68142	68897.2	135.922	471.956	797.504	182.63	924.9	620.992	18.301	32265.7	9.598	19.088	19.931	31531.5	-
MW0006140	Benzaldehyde	苯甲醛	Benzene and substituted derivatives	苯及其衍生物	Benzene and substituted derivatives	苯及其衍生物	C7H6O	1	0.608	100-52-7	FALSE	FALSE	TRUE	27717.1	23288.8	24774	28890.2	23765.1	24767.1	24634.7	27928.5	28137.7	25754.4	25377.7	24208.1	31923.2	37517.7	25371.4	26451.4	28557.9	22749.6	28579.5	24070.2	27865.1	29108.1	30503.9	30085.4	C00261
MEDP0669	3-Chloroaniline	3-氯苯胺	Benzene and substituted derivatives	苯及其衍生物	Benzene and substituted derivatives	苯及其衍生物	C6H6ClN	1	0.9375	-	FALSE	FALSE	TRUE	154430	125786	138163	158465	132012	133344	136384	122527	169052	133694	136304	139856	169163	184417	140857	148550	162113	126705	158495	131507	148443	156878	157056	173196	-
MW0107145	Glycyl-L-phenylalanine	甘氨酰-苯丙氨酸	Amino acid and Its metabolites	氨基酸及其代谢物	Small Peptide	小肽	C11H14N2O3	1	0.9122	-	FALSE	TRUE	TRUE	4137.7	3776.72	16.833	37.443	3658.62	3712.13	20779.1	21427.5	22720.9	23551.7	21227.7	21209.3	1204.35	1903.23	1276.38	1644.78	876.335	3713.13	1360.64	279.216	461.078	15.96	313.119	1342.47	-
MEDP1241	5-Hydroxy-2-oxo-4-ureido-2,5-dihydro-1H-imidazole-5-carboxylic acid ester	5-羟基-2-氧代-4-脲基-2,5-二氢-1H-咪唑-5-羧酸酯	Organic acid and Its derivatives	有机酸及其衍生物	Organic acid and Its derivatives	有机酸及其衍生物	C5H6N4O5	1	0.8905	-	TRUE	TRUE	TRUE	9805.79	8709.11	8805.66	9617.42	9580.86	9489.88	9614.92	8608.1	14272	11127.6	11284.5	9623.69	10992.6	10032.2	13692.5	11715.2	13410.7	15449.9	18578.5	16033.3	17256.7	19256.9	18815.5	18046	-
MEDTP01664	Carnitine C14:0	(±)-肉豆蔻酰肉碱	FA	脂肪酰类	CAR	酰基肉碱	C21H41NO4	1	0.8422	-	FALSE	TRUE	TRUE	6317.08	7950.66	8898.59	9249.92	5938.05	7620.41	686.548	4937.68	834.835	5709.68	7181.63	6192.52	8918.35	9290.82	9918.58	10405.2	6867.56	11054.5	9710.68	6394.34	11790.8	12689	15837.2	13877.5	-
MEDP1166	Phosphatidylcholine	PC(16:0/2:0)	GP	甘油磷脂类	PC	磷脂酰胆碱	C26H52NO8P	1	0.6632	-	TRUE	TRUE	TRUE	24853.6	21943	27021.8	23112.2	31297.4	27503.6	138042	152742	188951	126743	127494	123942	4797.2	6199.44	9647.11	7549.43	15809.5	30083.3	13779.1	25246.1	7440.93	8822.31	10200.3	9972.61	C00157	6.77809
MEDP1434	Carnitine C4:DC	肉碱 C4:DC	FA	脂肪酰类	CAR	酰基肉碱	C11H19NO6	1	0.6298	-	TRUE	TRUE	TRUE	8623.11	8557.5	9661.81	8876.95	8877.83	8533	8244.6	10064.9	12201.3	8555.44	10227.8	8106.99	10986.8	10228.4	11923.6	10184.2	11947.7	11912.8	15496.3	12188	13313.2	16486.4	14439.4	14315.4	-
MADP0513	N-(2-Hydroxyethyl)nicotinamide	N-(2-羟乙基)烟酰胺	Alcohol and amines	醇、胺类	Amines	胺类	C8H10N2O2	1	0.5275	-	FALSE	FALSE	TRUE	53242.7	45027.9	50130.4	57567.9	49968.8	48445.2	49615.7	45449.3	62570.6	51280	51649.9	49030.9	59130.1	73283.4	52002.6	54026.8	55264.9	45779.6	58651.4	49151.5	60162	58625.6	56478.1	61030.4	-
MW0110983	D-erythro-Sphingosine C-20	D-赤型鞘氨醇C-20	SL	鞘脂类	SPH	鞘氨醇	C20H41NO2	2	0.9567	-	TRUE	FALSE	TRUE	202508	178680	187430	176510	177328	179887	1.07149e+06	1.17723e+06	1.2303e+06	1.18611e+06	1.25435e+06	1.20115e+06	104133	122916	108934	86399.3	115882	77164.2	1.857	63896.2	248553	275407	641450	276634	-
MW0110917	N-(2-hydroxyethyl)icosanamide	花生四烯酸乙醇酰胺	Organic acid and Its derivatives	有机酸及其衍生物	Organic acid and Its derivatives	有机酸及其衍生物	C22H45NO2	2	0.9256	-	FALSE	FALSE	TRUE	9444.51	6542.4	6214.37	14413	14227.2	23517.6	32948.1	11510.7	42109.5	10303.4	8822	9603.58	40380.9	15704.8	41389.3	16462.2	25684.8	6921.56	22432.6	13199.4	32503.3	22048.1	28445.6	55780.8	-
MW0108733	N-tetradecylcyclohexanecarboxamide	N-十四烷基环己烷甲酰胺	Alcohol and amines	醇、胺类	Amines	胺类	C21H41NO	2	0.922	-	TRUE	TRUE	TRUE	5527.48	5323.88	5527.69	5357.48	5718.26	4680.24	27818.5	31052	30653.1	3065.76	29176.5	2586.51	280.853	908.711	239.197	1834.68	188.206	405.273	3088.67	888.209	3456.11	1771.61	4043.81	3494.38	-
MW0011920	PE-NMe(16:0/16:0)	1,2-Dipalmitoyl-sn-glycero-3-phosphoethanolamine-N-methyl	GP	甘油磷脂类	PE	磷脂酰乙醇胺	C38H76NO8P	2	0.9141	-	TRUE	TRUE	TRUE	8953.47	15453.4	22086.3	23825.6	22589.3	18033.1	7634.8	7160.33	19123.2	16469.5	15358.6	14754.4	6146.01	11698.3	15565.4	3544.4	13143.9	11163.1	3329.36	5778.46	10194.4	1670.05	6022.11	7121.91	-
ZINC43617340	Pipericine	（2E，4E)-N-(2-甲基丙基）十八碳-2，4-二烯酰胺	FA	脂肪酰类	Others	其他	C22H41NO	2	0.8985	-	TRUE	TRUE	TRUE	5891	4519.89	4805.07	4513.06	5485.58	5703.11	24495.8	28834.7	25285.4	27635.5	23739.6	24073.1	3559.91	1266.11	759.797	731.825	1074.84	1002.85	10914.7	9700.9	9653.48	10273.1	10250.5	12439.7	-
MW0126399	Chinomethionat	甲硫磷	Others	其他	Medicine	药物	C10H6N2OS2	2	0.898	-	TRUE	TRUE	TRUE	6.473	348.621	419.045	611.286	354.334	298.296	381.629	460.252	586.178	166.601	225.178	345.283	5266.63	3299.64	2773.44	3038.81	1857.35	351.868	4220.79	314.306	3748.43	3986.13	4490.73	3955.67	-
MW0154729	Oleoyl Ethanolamide-d4	油酰乙醇酰胺-D4	FA	脂肪酰类	FFA	游离脂肪酸	C20H35D4NO2	2	0.888	-	FALSE	TRUE	TRUE	54897.5	108285	56191.8	63481.6	52962.2	183592	105622	62206.9	177117	58107.6	59956.4	58425.7	245827	87842.4	144746	138664	196546	57970.8	165175	52403.1	268488	166137	228810	241261	-
MW0149849	Gln-Tyr-Val	谷酰氨-酪氨酸-缬氨酸	Amino acid and Its metabolites	氨基酸及其代谢物	Small Peptide	小肽	C19H28N4O6	2	0.8856	-	FALSE	FALSE	TRUE	20301.2	15900.2	18847.6	22252.4	16369.8	18744	18764.4	21316.4	21546.4	19994.9	17580.8	18459.4	21728	26370.1	20469.2	18116.9	20266.6	16199.2	22661.2	18356.8	21296.1	22459.2	26309.5	22437.4	-
MW0147818	-CP 47,497-d11	-	Heterocyclic compounds	杂环化合物	Heterocyclic compounds	杂环化合物	C21H23D11O2	2	0.8812	-	TRUE	TRUE	TRUE	24789.2	21473.3	23272.8	23561.2	22226.1	20215.5	90752.8	101285	96104.1	100734	83017.3	93683.3	10331	19073.5	19338.7	18580.5	20689.1	3940.14	27081.3	26262.2	15196.3	14179.1	2.821	20878.1	-
MW0107265	His-Lys-Lys	组氨酸-赖氨酸-赖氨酸	Amino acid and Its metabolites	氨基酸及其代谢物	Small Peptide	小肽	C18H33N7O4	2	0.8792	-	FALSE	TRUE	TRUE	5016.59	4562.02	5166.91	5024.59	4493.5	4633.91	20750	21003.8	22221.4	22595.3	21398.4	21227.2	14.03	3.415	17.695	10.571	34617.6	22.749	14.73	23.043	75.653	10.082	3.554	18.049	-
MW0009858	Tenovin-6	Tenovin-6	Benzene and substituted derivatives	苯及其衍生物	Benzene and substituted derivatives	苯及其衍生物	C25H34N4O2S	2	0.8728	-	FALSE	FALSE	TRUE	20793.9	16811	19016.1	19280.3	17741.1	18755.1	21883.5	22188	23034.1	12136.3	21108.6	19473.3	24726.1	27777.5	16939.4	22347.2	21936.1	17950	21623.1	18983.9	23830.3	22670.4	25658	25035.7	-
MW0152308	Leu-Glu-Arg-Met-Phe	-	Amino acid and Its metabolites	氨基酸及其代谢物	Small Peptide	小肽	C31H50N8O8S	2	0.8618	-	FALSE	TRUE	TRUE	1269.69	453.638	760.437	1705.99	1197.58	591.576	1460.9	3801.61	2061.2	4054.81	3329.53	2403.5	254.537	1262.45	576.266	371.406	77.353	570.064	651.226	1451.07	655.214	1394.98	605.31	687.193	-
MW0054562	1-(1Z-hexadecenyl)-sn-glycero-3-phosphocholine	1-(1Z-Hexadecenyl)-sn-glycero-3-phosphocholine	GP	甘油磷脂类	LPC-P	溶血磷脂酰胆碱	C24H50NO6P	2	0.8597	-	FALSE	TRUE	TRUE	10062.3	9207.46	9454.65	9655.71	8549.52	9799.53	17842.4	17874.4	14808.7	17722.2	14283.4	14761.7	9036.68	10110.1	9932.91	8742.45	12843.1	16071	29887.5	32339	26192	25221.3	26308.3	27756.2	-
MW0140724	(Z)-2-tetracos-15-enamidoethanesulfonic acid	-	Others	其他	Others	其他	C26H51NO4S	2	0.8535	-	FALSE	TRUE	TRUE	64239.7	56474.8	63101	63463.4	70385.8	64746.2	81204.2	93003.4	96540.2	86174.3	73450.8	75092.7	48524.1	53528.2	66533.5	65238.7	79616.8	79075	55799.3	80192.9	45243.2	43283.6	45000.8	49213.7	-
MW0054405	Longicamphenylone	Longicamphenylone	Aldehyde,Ketones,Esters	醛、酮、酯类	Esters	酯类	C15H24O	2	0.8087	-	FALSE	FALSE	TRUE	18445.7	15203.9	17981.9	18864.8	18564.1	16374.2	19020.8	19939.2	20322.7	20059.9	19348.3	18605.7	20647	23906.8	18586.9	18233.3	19726.6	16560	21288.4	17982.6	21411.9	21650.9	23385.5	22239.8	-
MW0126295	Pyrazin-2-carboxylic acid	吡嗪-2-羧酸	Organic acid and Its derivatives	有机酸及其衍生物	Organic acid and Its derivatives	有机酸及其衍生物	C5H4N2O2	2	0.7972	-	FALSE	TRUE	TRUE	57050.5	51004.6	50374.5	59445.4	53747.1	53407.5	53662.8	57413	61126.5	55023	55952.6	54588.3	72000.7	77897.4	57269.1	55545.3	63131.4	50883.6	70200.3	55446.7	65925.3	59471.8	68913.1	63547.3	C19915
MW0152993	Lys-His-Met	L-赖氨酸-L-组氨酸-L-蛋氨酸	Amino acid and Its metabolites	氨基酸及其代谢物	Small Peptide	小肽	C17H30N6O4S1	2	0.7708	-	TRUE	FALSE	TRUE	259992	332019	372522	294543	352684	196200	251942	397227	239351	274134	318888	270098	114542	125490	123177	286473	204773	184636	267602	254564	249155	268433	126202	309565	-
MW0108157	Met-His-Lys	甲硫氨酰-组氨酰-赖氨酸	Amino acid and Its metabolites	氨基酸及其代谢物	Small Peptide	小肽	C17H30N6O4S1	2	0.7702	-	TRUE	TRUE	TRUE	4401.75	4879.21	5923.31	5659.78	7608.93	7372.67	8343.83	9780.38	13092.4	8038.54	6699.85	7170.89	10177.2	8308.69	8583.97	7742.56	10943.5	5059.37	10715.8	10893.9	11025.5	11727.3	12043.1	12099.4	-
MW0012995	1-octadecanoyl-2-(4Z,7Z,10Z,13Z,16Z,19Z-docosahexaenoyl)-sn-glycero-3-phosphocholine	1-硬脂酰基-2-十二碳六烯酰基-sn-甘油-3-磷酸胆碱	GP	甘油磷脂类	PC	磷脂酰胆碱	C48H84NO8P	2	0.7506	-	FALSE	TRUE	TRUE	78832	78477.4	77114.1	101160	86564.6	85430.5	101635	121403	144291	109568	115408	125504	97902.2	95977.8	82377.9	79499.1	89815.6	66767.5	96789.2	85650.5	84932.4	85017.7	84487.9	87527.9	-
MW0006489	Carbaryl	卡巴利	Benzene and substituted derivatives	苯及其衍生物	Benzene and substituted derivatives	苯及其衍生物	C12H11NO2	2	0.731	-	TRUE	TRUE	TRUE	41150.6	37697.8	40344.8	43989.7	39052.1	39752.8	42888.4	44573.7	51808.1	40727.8	47824.9	42746.5	33516.4	41331.1	15371.5	29170.1	33035.6	34139.3	40716.5	43815.7	37545.1	37719.2	38502.2	40827.1	C07491
MW0103493	Chloroquine	氯喹	Heterocyclic compounds	杂环化合物	Heterocyclic compounds	杂环化合物	C18H26ClN3	2	0.7219	-	FALSE	TRUE	TRUE	139.953	130.046	141.884	135.102	91.11	103.223	661.797	491.901	307.346	244.417	588.489	367.678	69.107	127.642	322.733	196.484	197.808	365.473	1000.55	926.597	845.426	797.463	872.4	831.541	C07625
MW0110992	Dicyclohexylamine	二环己胺	Alcohol and amines	醇、胺类	Amines	胺类	C12H23N	2	0.7162	-	TRUE	FALSE	TRUE	114353	112933	113901	134762	123382	126566	111952	166235	145027	126439	149355	133467	163276	171924	140846	131455	145914	130161	174862	126779	138339	171246	149825	173082	C14686
MW0002641	L-Phenylalaninol	L-苯丙氨醇	Benzene and substituted derivatives	苯及其衍生物	Benzene and substituted derivatives	苯及其衍生物	C9H13NO	2	0.7055	-	TRUE	TRUE	TRUE	157280	145051	152178	179711	150892	154480	164678	174170	199620	161845	184809	168352	121849	153440	121935	107013	126936	132356	156624	154322	145893	147484	152305	147215	-
MW0103090	VERBENONE	（-)-马鞭草烯酮	Terpenoids	萜类	Terpenoids	萜类	C10H14O	2	0.7038	-	FALSE	TRUE	TRUE	1582.18	1418.88	1354.72	1740.5	823.544	1467.75	5065.34	4862.61	4506.37	5225.06	5439.02	3440.71	1129.31	1039.65	999.588	1020.53	1319.6	1892.85	2691.8	2725.62	2027.82	2009.47	2797.29	1742.77	C09913
MW0123754	Doramapimod	多拉马莫德	Heterocyclic compounds	杂环化合物	Heterocyclic compounds	杂环化合物	C31H37N5O3	2	0.6962	-	FALSE	TRUE	TRUE	14205.3	20519.4	12110.3	17041.4	18739.9	18550.1	14033.2	22180.6	17082.5	19087.9	12219.6	12511.3	13315.7	14710.9	11978.6	15952.7	13107.9	19574.5	9281.4	13186.7	11931	13827.5	9350.82	9338.49	-
MW0005923	Aceclofenac	醋氯芬酸	Benzene and substituted derivatives	苯及其衍生物	Benzene and substituted derivatives	苯及其衍生物	C16H13Cl2NO4	2	0.6742	-	FALSE	TRUE	TRUE	64132.3	59453.4	57411	77259.3	60670.5	64555.3	66540.9	69299.3	75601.7	68854.6	61613.3	65170.2	75976	81395.6	62300.6	67805.9	68988.4	54827.9	77154.8	68464.8	72784.7	81597.3	82321.3	81205.3	-
MW0057646	1-Stearoyl-2-docosahexanoyl-sn-glycero-3-phosphocholine	1-二十二碳六烯酰基-2-硬脂酰基-sn-甘油-3-磷酸胆碱	GP	甘油磷脂类	PC	磷脂酰胆碱	C48H84NO8P	2	0.6734	-	FALSE	TRUE	TRUE	6195.66	2808.07	4426.56	15941.7	3836.74	2987.32	7507.96	16802.5	23404.3	17036.2	25275.5	15880.1	12461.8	13043.3	7751.37	6672.48	5796.43	7068.79	2942.41	3035.67	3946.91	644.064	2017.73	3376.75	-
MW0106754	gamma-Aminobutyric acid	（2R)-2-羟基-2-苯乙基芥子油苷	Amino acid and Its metabolites	氨基酸及其代谢物	Small Peptide	小肽	C4H9NO2	2	0.6323	-	FALSE	TRUE	TRUE	102.803	80.519	133.597	95.251	47.241	115.78	26.958	27.228	43.88	59.79	20.554	41.426	105.102	131.042	101.263	118.523	85.546	90.83	50.331	94.809	68.269	110.265	107.587	97.181	C00334
MW0141392	14(15)-EET-d11	-	FA	脂肪酰类	Others	其他	C20H21D11O3	2	0.5124	-	FALSE	TRUE	TRUE	18862.5	17916.1	18827.4	19814	18037.1	16686.8	72773.3	77067.7	81001.4	81265.2	78595.2	77047.5	7143.59	15508.7	16371.6	20737.3	23041.9	7.823	13329.7	21897.8	19.617	28.643	12.506	13.071	-
MW0115000	L-Formylkynurenine	N’-甲酰基犬尿氨酸	Amino acid and Its metabolites	氨基酸及其代谢物	Amino acid derivatives	氨基酸衍生物	C11H12N2O4	3	0.9574	-	TRUE	TRUE	TRUE	707.661	603.257	631.93	728.419	593.318	632.716	2012.34	2111.29	2290.05	2069.39	2371.16	2266.19	474.355	151.001	393.907	480.774	555.572	324.431	1304.38	855.573	1160.28	1177.31	927.935	1051.58	C02700	1.92136
MW0166213	3-Hydroxy-5-methyl-o-methyltyrosine	3-羟基-5-甲基-邻-甲基酪氨酸	Others	其他	Others	其他	C11H15NO4	3	0.8581	-	TRUE	TRUE	TRUE	386.836	370.317	530.231	345.891	293.672	295.79	2699.59	2860.15	1.873	2233.7	2293.46	1832.95	4.256	8.65	3.147	3.414	9.525	13.936	9.486	5.985	5.695	1.388	6.631	7.511	-
MW0140526	(1E,2S)-2-methylbutanal oxime	(1E,2S)-2-甲基丁醛肟	Others	其他	Others	其他	C5H11NO	3	0.7082	-	TRUE	TRUE	TRUE	2858.93	2459.32	2733.87	2732.33	2419.66	2650.03	7322.57	7371.31	7199.95	7877.61	8215.86	7641.56	1666.06	1974.46	1354.39	1156.18	2187.07	2724.33	4705.22	4144.56	4514.24	3988.92	4322.45	4504.89	C19491
MW0060453	PE-NMe2(18:3(9Z,12Z,15Z)/18:1(9Z))	PE-NMe2(18:3(9Z,12Z,15Z)/18:1(9Z))	GP	甘油磷脂类	PE	磷脂酰乙醇胺	C43H78NO8P	3	0.7035	-	TRUE	FALSE	TRUE	1121.86	684.858	705.994	369.62	313.009	702.238	230.529	740.735	874.98	507.848	621.906	401.223	3625.53	5172.63	3127.34	3357.8	3990.46	678.895	1603.92	1594.14	1437.07	1116.55	393.953	357.622	-
MW0110259	Tyr-Ile	-	Amino acid and Its metabolites	氨基酸及其代谢物	Small Peptide	小肽	C15H22N2O4	3	0.6823	-	FALSE	TRUE	TRUE	0.518	56.374	68.027	47.794	0.444	0.708	426.066	549.015	237.879	0.736	380.945	1.571	1.44	1.644	1.283	1.052	1.338	2.656	1.572	2.246	0.857	0.921	1.911	1.126	-
MW0107803	Leu-Ser	L-亮氨酸-L-丝氨酸	Amino acid and Its metabolites	氨基酸及其代谢物	Small Peptide	小肽	C9H18N2O4	3	0.6705	-	TRUE	TRUE	TRUE	411.558	305.904	370.033	330.476	286.292	336.81	4.997	4002.14	2339.72	2511.45	2220.73	1748.57	20.425	3.243	9.154	3.774	33.008	18.488	5.5	20.585	7.818	5.887	23.763	4.748	-
MW0060369	PE-NMe2(18:1(9Z)/18:3(9Z,12Z,15Z))	PE-NMe2(18:1(9Z)/18:3(9Z,12Z,15Z))	GP	甘油磷脂类	PE	磷脂酰乙醇胺	C43H78NO8P	3	0.6569	-	TRUE	TRUE	TRUE	663.073	394.131	252.089	141.472	203.845	267.108	99.971	331.514	353.595	429.307	225.823	163.344	2206.68	3704.1	1768.87	1705.69	2145.97	272.298	649.768	786.819	750.629	522.088	599.808	365.315	-
MW0057142	PC(18:3(9Z,12Z,15Z)/P-16:0)	PC(18:3(9Z,12Z,15Z)/P-16:0)	GP	甘油磷脂类	PC	磷脂酰胆碱	C42H78NO7P	3	0.5635	-	FALSE	TRUE	TRUE	15.474	4.507	41.034	6.565	74.407	28.973	240.124	274.533	211.669	415.513	100.519	206.16	22.545	60.848	11.977	2.032	3.384	25.996	10.486	9.561	82.211	49.14	57.795	57.408	-
MW0122982	Austinol	奥斯汀醇	Heterocyclic compounds	杂环化合物	Heterocyclic compounds	杂环化合物	C25H30O8	3	0.563	-	FALSE	FALSE	TRUE	12326.3	9586.5	10756	12783.3	10368.8	10481.8	12229.6	11446.7	13061	10536.4	10440.6	10596.8	14845.4	18593.3	12758	11234.8	12865.4	9903.11	13290.7	9890.73	13857.5	12423.4	14761.3	13171.8	-
MW0113284	6-({2-[4,6-dihydroxy-2-methoxy-3-(3-methylbut-2-en-1-yl)phenyl]-2-hydroxyacetyl}oxy)-3,4,5-trihydroxyoxane-2-carboxylic acid	6-({2-[4，6-二羟基-2-甲氧基-3-(3-甲基丁-2-烯-1-基）苯基]-2-羟基乙酰基}氧基)-3，4，5-三羟基恶烷-2-羧酸	Organic acid and Its derivatives	有机酸及其衍生物	Organic acid and Its derivatives	有机酸及其衍生物	C20H26O12	3	0.5359	-	TRUE	TRUE	TRUE	11704	9281.64	10765.7	14813.1	10600.1	13161.7	11637.1	12567.8	12509.9	11476.7	13262.1	12388.4	7539.52	10948	8360.21	6598.85	7192.29	8343.3	10904.4	11569.4	11083.9	11327	10920.4	9440.38	-
MW0054526	LysoPC(18:3(6Z,9Z,12Z))	溶血PC(18:3(6Z,9Z,12Z))	GP	甘油磷脂类	PC	磷脂酰胆碱	C26H48NO7P	3	0.5105	-	TRUE	TRUE	TRUE	1888.43	1496.22	2434.09	1104.84	1754.35	2090.75	3430.34	6901.5	9569.88	3147.3	2695.23	3463.28	536.143	608.037	786.868	651.761	877.729	1125.38	408.922	563.409	154.166	435.453	412.661	359.808	C04230	5.77663
MW0063549	SM(d18:0/22:3(10Z,13Z,16Z))	SM(d18:0/22:3(10Z,13Z,16Z))	SL	鞘脂类	SM	鞘磷脂	C45H85N2O6P	3	0.5006	-	TRUE	FALSE	TRUE	30083.8	34949	12371.2	34644.8	13238.9	21598.4	12154.7	14801.2	11804.3	25892.9	26551.7	29833.3	48988.2	62159	39947.8	48868.9	51862.9	38671	32282.8	25111.2	25892.5	32535.5	18813	24157	C00550
MW0057055	1,2-Dilinoleoyl-SN-glycero-3-phosphocholine	1,2-Dilinoleoyl-sn-glycero-3-phosphocholine	GP	甘油磷脂类	PC	磷脂酰胆碱	C44H80NO8P	3	0.5587	998-06-1	FALSE	FALSE	TRUE	34609.9	27818.2	33844.7	14331.5	73674.7	70545	34006.3	45219.8	37148.4	43473.3	125048	101992	48161.3	60570.8	29596.3	20634.4	31812.2	15976.1	51725.4	38600.6	18337.1	10423.2	15364.3	25678	-
MW0015117	7,12-Dihydroxy-3,11,15,23-tetraoxolanost-8-en-26-oic acid	-	Organic acid and Its derivatives	有机酸及其衍生物	Organic acid and Its derivatives	有机酸及其衍生物	C30H42O8	3	0.5578	97653-94-6 | 942950-96-1 | 100761-17-9	FALSE	FALSE	TRUE	34798.8	30501.6	35661.9	38659.9	36220	37080.2	33620	36020.8	53519.9	35611.2	38181	33672.3	50032	55233	39515.6	33445.7	35473.3	35103.2	48115.6	35075.8	46403	43447.9	47007.2	44569.8	-
MW0142552	2-Oxosuberate	2-氧辛二酸盐；2-氧代辛二酸；α-酮辛二酸盐	Organic acid and Its derivatives	有机酸及其衍生物	Organic acid and Its derivatives	有机酸及其衍生物	C8H12O5	3	0.7236	96406-05-2	FALSE	FALSE	TRUE	1.46593e+06	1.48153e+06	1.53463e+06	1.66424e+06	1.87343e+06	1.74515e+06	1.1714e+06	1.75249e+06	2.29934e+06	1.84628e+06	1.64722e+06	1.27418e+06	913860	1.80503e+06	1.15146e+06	1.05247e+06	1.41486e+06	1.63787e+06	1.39102e+06	1.66967e+06	1.17389e+06	1.11466e+06	1.31451e+06	1.34737e+06	-
MW0124530	Janthitrem G	Janthitrem G	Heterocyclic compounds	杂环化合物	Heterocyclic compounds	杂环化合物	C39H51NO6	3	0.5407	90986-51-9	FALSE	TRUE	TRUE	26.417	18.532	21.118	25.52	6.69	43.552	112.131	106.136	106.738	148.254	67.006	97.2	20.854	49.495	2.79	4.365	25.506	6.526	29.757	21.059	12.876	36.088	49.386	25.97	-
MW0124528	Janthitrem E	-	Heterocyclic compounds	杂环化合物	Heterocyclic compounds	杂环化合物	C37H49NO6	3	0.5995	90986-50-8	TRUE	FALSE	TRUE	64119.7	67759.7	84284.9	92689	81104.2	89405.1	77315.7	110326	98323.6	87681.5	79696.3	75331.7	35939.1	44321.4	44428.6	32382.5	41430.7	54454.9	97604.4	103628	72389.5	80633.7	81105.1	79619.5	-
MW0114854	Methyl cellulose	甲基纤维素	Carbohydrates and Its metabolites	碳水化合物及其代谢物	Sugars	糖类	C20H38O11	3	0.6041	9004-67-5	FALSE	FALSE	TRUE	40242.2	35399.5	42722.6	49069.1	37426.9	37633.2	41795.4	38251.6	42552	41294.1	41650.8	37115.7	53255.2	55830.3	40909.6	41116.7	45297.3	30398	53067	33978.2	48449.2	46580.2	53464.4	53975	-
MW0114498	D-Galactosamine	半乳糖胺	Alcohol and amines	醇、胺类	Amines	胺类	C6H13NO5	3	0.97	90-76-6	FALSE	TRUE	TRUE	3588.82	8270.96	11790.3	6523.48	15414.8	15925.5	11025.8	13399.1	8977.03	26867.2	18383.2	16985	9627.5	7225.45	6085.16	6718.85	3020.71	4654.81	8687.62	1506.61	7814.62	6326.64	9688.51	7974.07	C02262
MW0015122	7,7-Dimethyl-(5Z,8Z)-eicosadienoic acid	7,7-二甲基-(5Z,8Z)-二十碳二烯酸	FA	脂肪酰类	Oxidized lipids	氧化脂质	C22H40O2	2	0.5924	89560-01-0	FALSE	TRUE	TRUE	170.154	258.338	266.214	383.781	325.347	242.84	5310.67	8247.83	7535.57	6361.43	4514.12	5239.53	193.897	43.244	276.298	351.566	75.199	351.807	1199.21	1083.57	793.099	976.895	864.894	749.629	-
MW0156581	Inositol	新肌醇	Alcohol and amines	醇、胺类	Alcohols	醇类	C6H12O6	1	0.5032	87-89-8 | 643-12-9 | 488-59-5 | 6917-35-7 | 488-58-4 | 551-72-4 | 41546-34-3 | 643-10-7 | 488-55-1 | 488-54-0 | 576-63-6 | 38876-99-2	FALSE	FALSE	TRUE	2.09463e+06	2.03158e+06	1.96394e+06	2.92863e+06	3.0397e+06	2.17498e+06	2.13909e+06	2.20287e+06	3.15559e+06	2.76371e+06	3.01967e+06	2.06079e+06	2.79865e+06	2.99664e+06	2.62361e+06	2.63748e+06	2.94575e+06	2.67409e+06	2.91389e+06	2.96714e+06	3.17654e+06	3.28223e+06	2.94512e+06	2.43308e+06	C00137 | C06151 | C06152 | C06153 | C19891
MW0159351	Vinblastine	长春碱	Aldehyde,Ketones,Esters	醛、酮、酯类	Esters	酯类	C46H58N4O9	2	0.5575	865-21-4	FALSE	TRUE	TRUE	3329.79	3435.45	5911.42	3341.72	2870.43	4467.98	4178.65	1950.71	3700.99	4694.2	3957.49	2690.19	3008.07	3499.38	3358.78	3520.45	2941.27	4337.26	1102.73	1618.93	378.253	1220.6	1125.02	1852.46	-
MW0155028	Pfaffic acid	PFAFFIC酸	Terpenoids	萜类	Triterpene	三萜	C29H44O3	3	0.522	86432-14-6	FALSE	TRUE	TRUE	888.621	242.079	493.542	403.851	910.848	519.673	2418.02	1846.02	1962.48	1754.31	953.611	1496.19	533.562	586.638	509.914	175.456	650.599	622.194	532.78	825.589	890.337	300.692	529.72	807.607	C08965
MW0103598	Inosine diphosphate	肌苷 5'-二磷酸	Nucleotide and Its metabolites	核苷酸及其代谢物	Nucleotide and Its metabolites	核苷酸及其代谢物	C10H14N4O11P2	2	0.6155	86-04-4	TRUE	TRUE	TRUE	619042	574872	576952	598893	490335	565004	300140	338270	327151	348589	314239	323434	415401	582458	411824	402750	357685	285876	195339	200457	313239	202305	174938	198057	C00104	1.43755
MEDL02151	3'-Adenylic acid	3'-腺嘌呤核苷酸	Nucleotide and Its metabolites	核苷酸及其代谢物	Nucleotide and Its metabolites	核苷酸及其代谢物	C10H14N5O7P	1	0.7585	84-21-9	TRUE	FALSE	TRUE	7.58785e+06	6.62397e+06	7.11089e+06	8.15878e+06	6.31938e+06	6.76487e+06	4.01545e+06	4.05785e+06	4.23532e+06	4.60003e+06	3.6801e+06	4.35146e+06	4.99957e+06	7.31243e+06	4.68112e+06	4.9469e+06	4.06202e+06	3.50723e+06	2.91964e+06	3.03163e+06	4.87566e+06	3.48591e+06	3.52622e+06	3.34077e+06	C01367
MW0055405	N-Palmitoyl Taurine	N-棕榈酰牛磺酸	FA	脂肪酰类	FFA	游离脂肪酸	C18H37NO4S	2	0.9388	83982-06-3	TRUE	TRUE	TRUE	2834.47	3267.73	3774.69	5821.77	4998.96	3231.46	13474.3	15686.4	15700.3	11223.4	9474.61	11917.6	2574.48	1176.35	867.737	881.734	2974.43	4101.47	1723.81	1686.12	1177.89	1135.51	1369.46	567.372	-
MW0000158	Cabergoline	卡麦角林	Alkaloids	生物碱	Alkaloids	生物碱	C26H37N5O2	3	0.615	81409-90-7	FALSE	TRUE	TRUE	6603.56	6121.38	7787.06	9991.52	8550.43	5895.83	14578	26015	15344.8	13311.5	10780.8	11520.3	6301.32	5883.09	5319.91	4963.8	12117.5	13618.9	6868.19	8981.75	7478.97	3613.27	5214.95	3998.35	C08187
MW0015555	Acetylvalerenolic acid	乙酰戊烯醇酸	Terpenoids	萜类	Sesquiterpenoids	倍半萜	C17H24O4	2	0.8575	81397-67-3	TRUE	TRUE	TRUE	1249.48	934.94	1417.67	1606.71	1258.64	1157.39	8133.62	11218.5	10182.3	9452.86	7796.56	7223.44	222.263	283.776	11.603	14.464	289.445	451.138	10.248	608.606	302.602	7.853	4.805	6.093	-
MW0109041	Pantothenic acid	泛酸	CoEnzyme and vitamins	辅酶和维生素	CoEnzyme and vitamins	辅酶和维生素	C9H17NO5	1	0.9126	79-83-4	TRUE	TRUE	TRUE	319054	309650	357901	359247	318899	317621	326333	307886	339945	331014	327343	317606	118939	127570	125170	123231	122992	155818	184094	126909	155822	152447	151928	172698	C00864
MW0007512	L-Lactic acid	L-乳酸	Organic acid and Its derivatives	有机酸及其衍生物	Organic acid and Its derivatives	有机酸及其衍生物	C3H6O3	1	0.9888	79-33-4	TRUE	TRUE	TRUE	170101	184179	173101	171576	107968	128846	315327	256385	262617	273852	277776	263764	326031	292238	281551	361518	351814	282081	517821	325598	428865	443686	500292	504411	C00186
MW0154985	Penitrem F	培尼替林 F	Heterocyclic compounds	杂环化合物	Heterocyclic compounds	杂环化合物	C37H44ClNO5	3	0.6441	78213-65-7	TRUE	TRUE	TRUE	2946.08	3308.59	3077.14	4693.15	4605.6	3234.41	35311.2	36480.9	38311.3	31916.4	33270	28669	365.187	522.983	2101.37	1965.21	1742.86	2638.5	2714.28	3050.78	2710.44	2501.47	2749.77	2516.77	C20598
MW0053489	Geranyl diphosphate	牻牛儿基二磷酸盐	Organic acid and Its derivatives	有机酸及其衍生物	Phosphoric acids	磷酸类化合物	C10H20O7P2	2	0.7285	763-10-0	FALSE	TRUE	TRUE	25433.6	28048.1	23228	31869.2	31438.4	27823.2	26035.5	24763.5	24606.3	29762.9	19128.6	23205.1	27532.7	31174.4	26451.1	27508.2	33456.9	30004.8	25246.6	29026.1	30269.5	33188.3	32672.5	30792.7	C05847
MW0015446	9E-heptadecenoic acid	9E-十七碳烯酸	FA	脂肪酰类	Oxidized lipids	氧化脂质	C17H32O2	3	0.864	76261-97-7	FALSE	TRUE	TRUE	25971.3	16487.3	34862.4	38530.6	39753.4	18755	75669.9	63656.9	47844.8	23650.1	23103.2	31625.3	32622.6	27455.5	18547.7	11422.5	23368.8	36387.8	8975.56	10978.8	9410.61	6540.4	7773.06	3753.74	C16536
MEDN0024	3-Chloro-L-tyrosine	3-氯-L-酪氨酸	Amino acid and Its metabolites	氨基酸及其代谢物	Amino acid derivatives	氨基酸衍生物	C9H10ClNO3	1	0.6209	7423-93-0	FALSE	TRUE	TRUE	21275.2	18770.4	21086.8	30509.4	22354.2	23859.9	13597.5	23434.2	14523.1	16477.8	14558.8	14258	25979.6	24280.8	21297.5	16755	18791	12078.9	6456.83	6030.18	12392.7	10941.6	9699.44	5869.96	-
MW0157212	Sterculic acid	石桐酸	FA	脂肪酰类	FFA	游离脂肪酸	C19H34O2	3	0.6765	738-87-4 | 55088-60-3	FALSE	TRUE	TRUE	58.615	32.587	99.37	227.15	216.283	115.983	10482.6	8256.58	6578.86	3255.53	2907.54	6136.73	105.498	67.505	77.444	30.372	59.798	36.598	68.871	69.588	46.938	16.024	21.694	25.521	C08366
MW0137875	Cerubidin	蜡菊素	Heterocyclic compounds	杂环化合物	Heterocyclic compounds	杂环化合物	C27H29NO10	2	0.6241	73610-99-8	FALSE	TRUE	TRUE	21348.7	24286.7	41652.5	47333.1	110645	46088.5	15651.3	41743.2	114031	84205.1	18635	31200.9	22262.9	28343.8	130057	29892.2	27930.7	44385.7	113388	155228	154919	163796	157206	208954	-
MW0103902	(3R)-3-hydroxy-3-methyl-5-(phosphonooxy)pentanoic acid	5-磷酸甲羟戊酸	Organic acid and Its derivatives	有机酸及其衍生物	Organic acid and Its derivatives	有机酸及其衍生物	C6H13O7P	2	0.7602	73566-35-5	TRUE	FALSE	TRUE	45507.7	47908	41228	40912.6	56320.2	56884.6	40329.8	55894.4	69705.4	57182	52015.2	29401.4	24298.6	40037.2	30373.3	29660.4	31875.1	53648.2	38779.1	55116.6	36780.3	32630.5	38663.9	41897.6	C01107
MW0015393	alpha-Dimorphecolic acid	α-二吗啡酸	FA	脂肪酰类	Oxidized lipids	氧化脂质	C18H32O3	1	0.8994	73543-67-6	TRUE	TRUE	TRUE	5133.21	3770.13	5463.54	6699.02	5461.63	4558.59	83579.2	96960.3	90967.7	58514.2	63013	58872.4	1634.35	815.437	1811.09	704.435	544.277	689.252	812.248	641.071	1039.52	751.992	882.643	582.643	C14767
MW0124100	Felodipine	非洛地平	Heterocyclic compounds	杂环化合物	Heterocyclic compounds	杂环化合物	C18H19Cl2NO4	2	0.71	72509-76-3	FALSE	TRUE	TRUE	54115.1	56393.9	68213.8	71789.9	55368.8	53558.1	69830.2	63497.1	71530.9	61733.2	64924.7	64773.5	71527.9	81929.3	54105.1	58753.4	55052	42799.6	42378.1	22398.4	46576.4	44163.9	53075.4	52739.4	-
MW0000334	Ecgonine methyl ester	芽子碱甲酯	Alkaloids	生物碱	Tropan alkaloids	莨菪烷类生物碱	C10H17NO3	3	0.7891	7143-09-1	TRUE	TRUE	TRUE	298.774	307.054	410.482	256.256	274.377	463.805	1672.38	1960.58	1792.14	1832.98	1224.21	1239.6	38.402	142.95	29.416	17.361	23.757	37.265	42.878	37.802	31.085	41.869	7.598	35.266	-
MW0115025	Oxoamide	乙酰胺	Alcohol and amines	醇、胺类	Amines	胺类	C10H12N2O2	2	0.5777	713-05-3	FALSE	TRUE	TRUE	64471.2	47858.9	57773.5	74253	58994.6	60791.9	76802	51796.1	96890.7	82100.7	79992.2	72547.4	80145.1	79700.6	65718.1	61297.8	75061.4	58364.8	114496	66944.8	100756	94631	115754	115751	-
MW0157418	Tetracenomycin C	四霉素C	Benzene and substituted derivatives	苯及其衍生物	Benzene and substituted derivatives	苯及其衍生物	C23H20O11	3	0.6718	71135-22-3	FALSE	TRUE	TRUE	21108.5	20089.1	24945.4	26968.5	23210	23699.3	17148.9	20265.1	27599.4	17671	20459.9	18021.5	25306.4	24826.4	20289.3	19603.3	24257.1	18250.1	11904.8	7884.34	9631.04	10647.7	9313.74	9419.07	C06801
MW0013395	1-hexadecanoyl-2-(5Z,8Z,11Z,14Z-eicosatetraenoyl)-sn-glycero-3-phosphoethanolamine	2-花生四烯酰基-1-棕榈酰基-sn-甘油-3-磷酸乙醇胺	GP	甘油磷脂类	PE	磷脂酰乙醇胺	C41H74NO8P	2	0.6735	70812-59-8	FALSE	TRUE	TRUE	586318	706804	708742	801950	712649	805474	1.06127e+06	1.082e+06	924124	818530	1.00875e+06	1.10399e+06	783327	742799	400116	266159	433449	352831	830117	547497	613122	536091	459133	714004	-
MW0103416	6-Methylthiopurine 5'-monophosphate ribonucleotide	6-甲硫基嘌呤5-单磷酸核糖核苷酸	Nucleotide and Its metabolites	核苷酸及其代谢物	Nucleotide and Its metabolites	核苷酸及其代谢物	C11H15N4O7PS	3	0.604	7021-52-5	TRUE	FALSE	TRUE	4225.94	5466.12	5445.05	5699.5	3944.95	4402.41	2503.97	2234.53	1509.05	350.034	340.015	566.185	1521.08	540.351	1339.3	909.001	265.04	1271.85	1846.33	1829.78	1534.6	410.921	1974.22	1117.84	C16615
MW0103719	Trifluridine	曲氟尿苷	Carbohydrates and Its metabolites	碳水化合物及其代谢物	Sugars	糖类	C10H11F3N2O5	2	0.6761	70-00-8	TRUE	FALSE	TRUE	1317.79	1447.2	1067.45	1399.21	849.815	1002.39	500.121	551.055	838.721	486.377	876.632	576.947	307.439	459.488	215.544	450.145	320.784	443.887	729.348	345.493	982.092	1070.49	122.797	497.279	-
MEDN1011	Mannitol	D-甘露醇	Carbohydrates and Its metabolites	碳水化合物及其代谢物	Sugar alcohols	糖醇	C6H14O6	1	0.5895	69-65-8	TRUE	FALSE	TRUE	1808.08	1046.87	353.673	2328.26	2830.7	797.143	2868.01	2424.07	5486.59	2586.58	1477.98	2408.5	4340.36	3396.43	4123.5	2849.5	3421.3	1780.11	3468.32	2157.46	3996.42	3026.64	3478.52	4432.86	C00392
MW0159863	Hypoxanthine	次黄嘌呤	Nucleotide and Its metabolites	核苷酸及其代谢物	Nucleotide and Its metabolites	核苷酸及其代谢物	C5H4N4O	1	0.9288	68-94-0	TRUE	TRUE	TRUE	51738.1	51234.4	45390.2	45851.2	50595.1	52553.8	197171	168896	176032	150458	184962	166021	20478.3	16690.9	15559.6	13995.2	18258.9	20553.1	94451.1	117922	95723.9	109720	97201.3	120718	C00262	1.80892
MW0007137	Fenpropimorph	苯丙吗啡	Benzene and substituted derivatives	苯及其衍生物	Benzene and substituted derivatives	苯及其衍生物	C20H33NO	3	0.7005	67564-91-4	FALSE	TRUE	TRUE	2417.24	3567.15	4156.03	4240.47	3262.53	3531.84	57625.4	66153.9	66854.1	69259.7	58701.2	58022.9	7177.48	3293.21	2604.79	1956.19	2400.26	2820.74	2837.23	5979.93	4454.67	4714.1	5240.79	2764.51	C18787
MW0109251	Phosphocreatine	磷酸肌酸	Heterocyclic compounds	杂环化合物	Heterocyclic compounds	杂环化合物	C4H10N3O5P	1	0.77	67-07-2	FALSE	TRUE	TRUE	4922.32	7560.93	7590.01	7244.03	6021.77	5423.05	4107.75	986.66	6193.71	4089.81	4515.41	7077.68	9399.21	7848.74	6732.86	6104.58	5165.11	3867.71	10634.4	4309.45	5706.46	9844.02	8914.22	13062.9	C02305
MEDL01963	Salicylamide	水杨酰胺	Benzene and substituted derivatives	苯及其衍生物	Phenolics	苯酚类	C7H7NO2	2	0.7654	65-45-2	FALSE	TRUE	TRUE	3734.41	6968.04	8832.39	10567.9	6693.66	8459.28	6929.16	9191.64	8177.52	7550.73	6432.78	4549.31	5827.45	6604.28	7026.93	6176.58	6127.78	6888.56	5637.3	777.795	5227.72	2461.77	5241.93	5318.37	-
MW0153455	Melosatin B	美乐菌素B	Heterocyclic compounds	杂环化合物	Heterocyclic compounds	杂环化合物	C19H19NO2	3	0.535	64838-03-5	FALSE	TRUE	TRUE	1309.6	665.454	2278.86	1702.24	495.514	946.929	3605.38	2517.69	3456.65	2022.01	4188.93	3457.66	636.06	1174.31	1020.61	729.638	572.906	1625.14	2376.52	1479.98	277.069	660.41	1418.38	705.118	C09222
MEDN1309	3-(Methylthio)propionic acid	3-甲基硫代丙酸	Organic acid and Its derivatives	有机酸及其衍生物	Organic acid and Its derivatives	有机酸及其衍生物	C4H8O2S	1	0.6783	646-01-5	FALSE	TRUE	TRUE	6895.01	6755.8	8092.46	10851	9463.42	7760.51	7124.94	7828.12	8980.09	10701	9309.42	10424.2	8276.71	8437.67	6885.52	6814.52	8173.38	6284.23	7068.39	5429.07	7801.53	6373.24	9648.76	6052.19	C08276
MW0119377	3-Amino-1,4-dimethyl-5H-pyrido[4,3-b]indole	3-氨基-1,4-二甲基-5H-吡啶并[4,3-b]吲哚	Heterocyclic compounds	杂环化合物	Indole and Its derivatives	吲哚及其衍生物	C13H13N3	3	0.6024	62450-06-0	TRUE	FALSE	TRUE	15941	13641.1	17869.8	16698.4	19557.5	18327.8	15468.8	13264.2	18350.1	15187.1	12440	10236	14718.8	18391.6	13052.1	12281.8	14154	10211.7	8949.51	12879.2	10116	12464.2	13544.4	13018.9	C19306
MW0168613	4-Methylumbelliferyl glucuronide	4-甲基伞形酮葡糖苷酸；4-甲基伞形酮基葡萄糖醛酸苷	Heterocyclic compounds	杂环化合物	Heterocyclic compounds	杂环化合物	C16H16O9	2	0.7809	6160-80-1	FALSE	TRUE	TRUE	142743	139852	155349	166462	147946	144758	158924	158368	199433	167285	168368	155037	141782	161180	122351	117393	130391	117228	142263	134445	146494	147933	157006	165417	C11584
MW0103478	Adenosine monophosphate	5'-腺嘌呤核苷酸	Nucleotide and Its metabolites	核苷酸及其代谢物	Nucleotide and Its metabolites	核苷酸及其代谢物	C10H14N5O7P	1	0.9524	61-19-8	TRUE	TRUE	TRUE	9.48216e+06	9.18993e+06	9.66776e+06	1.03317e+07	7.51359e+06	1.00363e+07	4.94651e+06	5.91364e+06	5.18244e+06	5.62209e+06	5.5403e+06	5.29246e+06	6.78017e+06	9.40752e+06	6.1228e+06	6.6434e+06	5.86553e+06	4.73692e+06	4.14605e+06	4.19308e+06	5.5879e+06	4.1376e+06	5.14178e+06	4.33402e+06	C00020	1.32225
MW0118781	4-Hydroxy-2-methylquinoline	2-甲基喹啉-4-醇	Heterocyclic compounds	杂环化合物	Heterocyclic compounds	杂环化合物	C10H9NO	2	0.717	607-67-0 | 5660-24-2	FALSE	TRUE	TRUE	118151	108568	127015	126286	160959	127347	131158	126176	149367	136463	129551	125297	110077	164550	91148.5	106225	105553	100445	122335	118786	113258	114053	115560	129653	C21873
MEDN0383	FFA(18:2)	亚油酸	FA	脂肪酰类	FFA	游离脂肪酸	C18H32O2	1	0.9644	60-33-3	TRUE	TRUE	TRUE	38335.7	45089.5	67639.9	79863.3	76093.5	53105.7	295616	286188	262714	140663	128336	150737	34441.7	22667.6	17596.2	11963.5	29259.4	29808.8	9759.68	10487.4	9763.28	6445.2	4119.26	5602.25	C01595
MW0108239	Methotrexate	甲氨蝶呤	Heterocyclic compounds	杂环化合物	Pteridines and derivatives	蝶啶及其衍生物	C20H22N8O5	2	0.8805	59-05-2	TRUE	TRUE	TRUE	169206	157336	169291	198675	179362	182544	177737	176182	209385	181406	173018	158124	130379	169044	122072	121250	135263	142014	154894	166410	154922	149448	151536	161706	C01937
MW0106760	gamma-Glutamylalanine	5-L-谷氨酰-L-丙氨酸	Amino acid and Its metabolites	氨基酸及其代谢物	Amino acid derivatives	氨基酸衍生物	C8H14N2O5	2	0.6528	5875-41-2	TRUE	FALSE	TRUE	1.80057e+06	1.71919e+06	1.79831e+06	2.04042e+06	1.84993e+06	1.87984e+06	1.86978e+06	1.93599e+06	2.38322e+06	2.05052e+06	1.9559e+06	1.79032e+06	1.49082e+06	1.8525e+06	1.38653e+06	1.3664e+06	1.48998e+06	1.57398e+06	1.75224e+06	1.85468e+06	1.73776e+06	1.7566e+06	1.79142e+06	1.84043e+06	C03740
MEDP1130	Eicosa-8,11,14-trien-5-ynoic acid	5,6-脱氢花生四烯酸	FA	脂肪酰类	Oxidized lipids	氧化脂质	C20H30O2	1	0.9271	58688-54-3	TRUE	TRUE	TRUE	80693	78896.6	134382	116382	108190	73765.1	341461	330805	285359	159356	172497	183473	45457.6	32905.8	35809.4	25943.9	59219.2	47573.2	68242.2	78500.3	102358	60619	40431.2	56351.5	-
MW0106167	cis-Aconitic acid	乌头酸	Organic acid and Its derivatives	有机酸及其衍生物	Organic acid and Its derivatives	有机酸及其衍生物	C6H6O6	3	0.5891	585-84-2	TRUE	TRUE	TRUE	2947.44	2761.79	2825.74	3026.33	2848.42	3381.17	1049.63	1183.44	4956.82	2391.25	2132.34	2654.74	15191.3	10231.2	8628.6	8098.71	10750.4	1187.53	10844.4	2494.18	9297.32	9680.45	12641.4	10684.2	C00417
MW0169991	Uridine	尿嘧啶核苷	Nucleotide and Its metabolites	核苷酸及其代谢物	Nucleotide and Its metabolites	核苷酸及其代谢物	C9H12N2O6	1	0.6226	58-96-8	TRUE	TRUE	TRUE	12124.8	4400.74	7282.56	4579.12	5779.11	1877.87	1578.03	3604.58	3007.59	3716.26	5239.36	4607.84	2640.3	96.097	2689.79	326.798	463.451	306.02	310.9	340.775	160.143	362.3	326.02	455.877	C00299
MW0007329	Homovanillin	3-甲氧基-4-羟基苯乙醛；（4-羟基-3-甲氧基苯基）乙醛；高香草醛	Benzene and substituted derivatives	苯及其衍生物	Phenolics	苯酚类	C9H10O3	3	0.8955	5703-24-2	TRUE	TRUE	TRUE	2137.12	2169.14	2446.88	2573.64	2334.78	2222.69	735.713	612.287	625.695	711.934	869.234	596.283	573.947	779.825	765.941	679.423	718.935	860.339	263.02	11.834	281.179	107.545	205.814	270.599	C05581
MW0143978	7-Keto-dehydroepiandrosterone	7-酮-脱氢表雄酮	Aldehyde,Ketones,Esters	醛、酮、酯类	Ketones	酮类	C19H26O3	2	0.6476	566-19-8	FALSE	TRUE	TRUE	141.812	479.631	602.223	196.89	121.333	113.674	3048.41	1815.22	2911.3	1256.38	2466.16	107.313	197.81	74.571	42.808	93.822	59.596	499.468	136.777	336.295	107.33	524.11	622.154	1245.26	-
MW0061080	Persin	珀辛	FA	脂肪酰类	Others	其他	C23H40O4	3	0.6327	56164-07-9	FALSE	FALSE	TRUE	3840.24	3903.14	4797.91	7127.55	2861.99	4737.46	3655.42	6347.29	4797.25	2943.21	37.762	1618.63	5360.18	4654.06	858.571	4444.37	1852.18	1255.92	1713.92	283.732	56.131	615.377	182.246	438.549	-
MW0115322	Sucralose	三氯蔗糖	Carbohydrates and Its metabolites	碳水化合物及其代谢物	Sugars	糖类	C12H19Cl3O8	2	0.7294	56038-13-2	FALSE	TRUE	TRUE	9754.36	13367.1	15510.7	14980.1	7824.01	9416.92	11318.3	5368.59	5490.28	9047.49	8610.23	11027.1	20013.6	19727.4	12461.6	15441.6	10092.6	7841.61	17323.8	5271.41	22878.1	27760.5	23934	22979.5	-
MW0105914	L-Aspartic acid	L-天冬氨酸	Amino acid and Its metabolites	氨基酸及其代谢物	Amino acids	氨基酸	C4H7NO4	1	0.9409	56-84-8	FALSE	TRUE	TRUE	13648.1	14027	13118.9	13681.3	8271.37	7908.09	79919.9	65001.9	49125.3	71647	65815.1	76099.8	29418.5	29395.5	19160.1	16384.3	11783.8	6449.33	225226	137251	273933	279285	369096	296559	C00049
MEDL02760	Glyceraldehyde	甘油醛	Aldehyde,Ketones,Esters	醛、酮、酯类	Aldehydes	醛类	C3H6O3	1	0.7763	56-82-6	TRUE	TRUE	TRUE	142300	118288	142466	129490	89999.6	89944.4	266856	232483	248404	222078	249633	228504	258955	203210	250167	255392	228190	273692	206587	312872	425466	419127	426176	457580	C02154
MW0121543	5-Hydroxytryptophan	5-羟基-L-色氨酸	Amino acid and Its metabolites	氨基酸及其代谢物	Amino acids	氨基酸	C11H12N2O3	1	0.7713	56-69-9 | 114-03-4 | 72572-98-6	TRUE	TRUE	TRUE	12370.5	10631.3	12949.2	12472.6	11778.1	11887.6	38187.9	31283.4	39858.2	39530.5	37821.9	36846.1	7008.08	6302.69	8438.6	8281.64	9056.53	11621	16236.4	16228.9	15197.7	14239.7	16013.7	12103.6	C01017
MW0109669	L-Serine	L-丝氨酸	Amino acid and Its metabolites	氨基酸及其代谢物	Amino acids	氨基酸	C3H7NO3	3	0.9106	56-45-1	TRUE	TRUE	TRUE	6015.24	7805.73	7683.5	8216.14	3422.72	7037.74	7155.1	6685.33	4640.16	9044.38	7985.82	9360.14	227.833	109.251	134.778	312.195	341.236	880.514	264.996	403.318	1758.23	1282.92	911.272	1683.44	C00065	10.2349
MW0009105	Nitazoxanide	硝唑尼特	Benzene and substituted derivatives	苯及其衍生物	Benzene and substituted derivatives	苯及其衍生物	C12H9N3O5S	2	0.7394	55981-09-4	FALSE	TRUE	TRUE	35271	44358.2	49793.8	50666	29106.3	33372.2	35099.4	28504.3	20654.9	39246.6	26046.5	34254.3	86242.4	60543.5	54712.2	64367.1	31677.2	17951.1	55687	18394.9	97762.2	93730.1	94501.6	93257.5	-
MW0052509	Eicosadienoic acid	二十碳二烯酸	FA	脂肪酰类	FFA	游离脂肪酸	C20H36O2	1	0.9583	5598-38-9	TRUE	TRUE	TRUE	4223.81	2586.1	6110.75	5581.17	4557.97	3320.68	309121	382333	288713	151074	153154	230137	1432.58	1780.2	1945.13	3345.73	2757.05	3157.66	8145.6	8494.61	8157.68	6336.6	5302.36	1604.07	C16525
MW0117984	2,5-Dimethyl-1,4-dithiane-2,5-diol	2,5-二甲基-1,4-二噻烷-2,5-二醇	Alcohol and amines	醇、胺类	Alcohols	醇类	C6H12O2S2	3	0.6585	55704-78-4	FALSE	FALSE	TRUE	1.77988e+06	1.5851e+06	1.7527e+06	2.03721e+06	2.10541e+06	2.03399e+06	1.46035e+06	2.03692e+06	2.63924e+06	2.12064e+06	1.9829e+06	1.47621e+06	1.04218e+06	2.18007e+06	1.33919e+06	1.23262e+06	1.70554e+06	1.89973e+06	1.62705e+06	1.96972e+06	1.38458e+06	1.34165e+06	1.48486e+06	1.59511e+06	-
MW0126267	protoporphyrin IX	原卟啉 IX	Heterocyclic compounds	杂环化合物	Heterocyclic compounds	杂环化合物	C34H34N4O4	2	0.7646	553-12-8	FALSE	TRUE	TRUE	1105.29	1326.52	1508.67	1485.84	1606.59	974.123	8712.72	10050	11113.7	10397.1	12140.7	10020.6	2210.11	2715.75	2326.2	1156.73	1529.31	1170.47	1422.77	1728.12	1711.6	2291.4	1821.24	2033.18	C02191 | C75594
MW0063244	(5Z)-5-[(2E,4E,6E,8E)-11-[(4R)-4-hydroxy-2,6,6-trimethylcyclohexen-1-yl]-2,9-dimethylundeca-2,4,6,8-tetraen-10-ynylidene]-3-[(E)-2-[(1S,4S,6R)-4-hydroxy-2,2,6-trimethyl-7-oxabicyclo[4.1.0]heptan-1-yl]ethenyl]furan-2-one	-	FA	脂肪酰类	Others	其他	C37H46O5	3	0.7711	54369-11-8	FALSE	TRUE	TRUE	67.545	147.908	78.158	81.828	8.73	170.882	146.612	101.527	179.836	68.707	229.274	19.202	23.025	31.84	52.947	46.673	63.944	60.515	7.105	20.432	47.967	35.2	17.883	27.203	-
MW0168231	Miraxanthin-V	美紫杉素-V	Organic acid and Its derivatives	有机酸及其衍生物	Organic acid and Its derivatives	有机酸及其衍生物	C17H18N2O6	3	0.9393	5375-64-4	TRUE	TRUE	TRUE	4493.29	5058.16	6001.98	8551.5	6525.71	4318.74	7459.38	7103.33	9246.94	6297.98	6513.81	6221.05	3049.57	4235.27	3553.77	4751.24	3324.93	4316.98	2789.38	4661.43	3503.55	3377.65	3144.05	2365.08	C08557
MW0012105	9-oxo-15R-hydroxy-16,16-dimethyl-5Z,13E-prostadienoic acid	9-oxo-15R-hydroxy-16,16-dimethyl-5Z,13E-prostadienoic acid	Hormones and hormone related compounds	激素及激素相关物质	Hormones and hormone related compounds	激素及激素相关物质	C22H36O4	2	0.7296	53658-98-3	FALSE	TRUE	TRUE	10632.8	9944.04	10032.3	16665.8	14251.2	9742.91	25131.3	28271	29360	18835.9	14949.6	17275.2	15465.8	11736.1	8726.08	6478.4	10397.1	11748.8	10661.3	11586.7	12295.1	5825.64	11027.8	8942.06	-
MW0054786	(2E,4E)-11-Methoxy-3,7,11-trimethyldodeca-2,4-dienoic acid	甲戊二烯酸	Terpenoids	萜类	Sesquiterpenoids	倍半萜	C16H28O3	2	0.7278	53092-52-7	TRUE	TRUE	TRUE	659.469	545.979	750.22	722.482	651.705	637.95	3237.6	2840.7	3031.78	2417.72	6202.11	2313.02	7.954	14.67	8.571	6.251	6.605	11.844	3.877	176.321	0.734	3.646	6.007	3.088	-
MW0115112	Perseitol	鳄梨醇	Alcohol and amines	醇、胺类	Alcohols	醇类	C7H16O7	2	0.5533	527-06-0	FALSE	TRUE	TRUE	1422.06	1355.94	3681.16	3820.37	3592.11	2896.37	4723.29	5659.4	9099.05	5959.73	5897.14	6240.33	2376.35	1724.84	907.112	1823.58	3323.53	3027.12	3961.47	1924.99	3249.09	3422.65	4097.11	2876.86	C08255
MW0126273	Psilocin	赛洛辛	Heterocyclic compounds	杂环化合物	Heterocyclic compounds	杂环化合物	C12H16N2O	3	0.5328	520-53-6	FALSE	TRUE	TRUE	7643.11	6120.65	5322.58	7436.09	5557.98	6943.11	9209.25	7942.93	5402.61	8584.05	6769.22	8101.16	12022.9	11837.1	7582.51	9696.53	6512.94	4342.97	10437.4	5873.04	12126.1	13014.3	11027.7	9709.98	C08312
MW0147425	Chlorophyll B	叶绿素 B	Heterocyclic compounds	杂环化合物	Heterocyclic compounds	杂环化合物	C55H70MgN4O6	3	0.9105	519-62-0	TRUE	FALSE	TRUE	20023.6	21607.3	23598.6	30090.3	20921.9	25649.8	28363.7	29762	39372.3	33715.8	44750.9	32255.2	7065.84	15940.4	14537.2	13886.3	6551.37	15518.6	26242.3	11728.1	25821.4	31528.6	28224.9	37135.4	-
MEDTN00896	N-acetyl-5-aminosalicylic acid	N-乙酰-5-氨基水杨酸	Benzene and substituted derivatives	苯及其衍生物	Benzene and substituted derivatives	苯及其衍生物	C9H9NO4	2	0.7277	51-59-2	FALSE	FALSE	TRUE	8803.86	10063.4	9044.3	11373.3	10076.6	8783.05	8259.11	8854.28	11539.6	8654.7	9010.78	8566.16	9351.75	10146.9	7097.01	7853.19	8365.25	8907.86	8023.33	8340.62	8087.85	8164.57	9056.4	8487.13	-
MW0144296	Jesaconine	乌头碱	Alcohol and amines	醇、胺类	Alcohols	醇类	C25H41NO9	3	0.5646	509-20-6	FALSE	FALSE	TRUE	87334.9	64080.5	95447.1	93723.2	130606	132563	145695	151911	156038	170269	217569	154141	88078.5	96600.3	69153.9	28215	81363.7	77978.5	69098.4	117285	117878	42698	76379.2	225594	C19990
MW0103061	FAA(18:1)	顺式十油酸	FA	脂肪酰类	FFA	游离脂肪酸	C18H34O2	1	0.9822	506-17-2	FALSE	TRUE	TRUE	673865	529789	693820	769649	700086	570890	1.16499e+06	1.3196e+06	1.26567e+06	660575	582691	815894	847008	637109	484376	384061	548523	703523	422849	427902	395532	187893	288304	204288	C21944
MW0053863	Heptadecanoic acid	十七烷酸	FA	脂肪酰类	FFA	游离脂肪酸	C17H34O2	3	0.8321	506-12-7	FALSE	TRUE	TRUE	18520.1	24710.1	22549.2	42404.5	14741.8	17226.7	151537	141754	142343	143812	81778.8	87908.9	43980.5	43391.7	16070.2	15382	19570.2	31123	44601.8	29891.7	31600.2	25063.4	31531.4	37046.2	-
MW0154890	Pantetheine	泛硫胺	Alcohol and amines	醇、胺类	Polyamines	多胺	C11H22N2O4S	2	0.8573	496-65-1	TRUE	FALSE	TRUE	3966.9	3597.64	4941.84	4503.54	3455.26	3140.54	3919.47	3507.24	1773.62	3156.98	3721.17	4744.78	1106.56	3013.71	2906.55	2299.25	2991.01	3636.12	2948.19	477.409	3020.51	611.613	2277.61	3693.94	C00831
MW0007319	Hippuric acid	马尿酸	Organic acid and Its derivatives	有机酸及其衍生物	Organic acid and Its derivatives	有机酸及其衍生物	C9H9NO3	1	0.7728	495-69-2	TRUE	TRUE	TRUE	23070.8	19495.1	23089.2	21722.5	19638.8	21955.3	20834.2	21412.2	24958.9	24291.9	24897.8	23432.9	5610.53	6623.23	6317.99	6331.94	7736.12	9263.93	12019.5	10895.1	17342.4	11207.2	9690.3	8484.55	C01586
MW0000203	Cuscohygrine	库斯科水	Alkaloids	生物碱	Alkaloids	生物碱	C13H24N2O	3	0.6036	454-14-8	FALSE	TRUE	TRUE	1654.71	433.838	1250.44	1752.71	1127.12	736.68	10915.4	14979.2	15519.1	11350.5	10454.9	9472.27	829.719	688.215	953.213	518.13	1014.71	1959.04	2031.77	1242.86	2455.64	2139.44	2540.32	1362.01	C06521
MEDL02411	5-hydroxy-L-tryptophan	5-羟基-色氨酸	Amino acid and Its metabolites	氨基酸及其代谢物	Amino acid derivatives	氨基酸衍生物	C11H12N2O3	1	0.7398	4350-09-8	TRUE	TRUE	TRUE	1230.08	1354.11	1735.21	1886.6	1365.01	2227.15	4748.54	3256.56	5341.79	3004.31	3344.44	2920.73	928.752	916.572	675.528	561.162	984.219	614.29	1123.35	449.115	716.573	645.377	966.744	429.502	C00643	3.59714
MW0141030	1-(5-O-phosphono-beta-D-ribofuranosyl)-1,4-dihydropyridine-3-carboxamide	NMNH;烟酰胺还原核苷酸	Nucleotide and Its metabolites	核苷酸及其代谢物	Nucleotide and Its metabolites	核苷酸及其代谢物	C11H17N2O8P	3	0.9864	4229-56-5	FALSE	TRUE	TRUE	3.8113e+06	9888.22	3.60832e+06	4.39593e+06	5907.05	4304.28	3.94097e+06	4.17759e+06	4.47002e+06	4.25607e+06	4.13565e+06	3.93804e+06	4.12898e+06	4.65948e+06	3.41461e+06	3.56253e+06	3.5339e+06	3.16624e+06	5.49578e+06	4.81835e+06	5.53768e+06	5.4767e+06	5.56291e+06	5.50501e+06	C21113
MEDN0657	D-Xylulose 5-phosphate	D-木酮糖-5-磷酸	Carbohydrates and Its metabolites	碳水化合物及其代谢物	Phosphate sugars	磷酸糖	C5H11O8P	2	0.6888	4212-65-1	FALSE	TRUE	TRUE	11381	23252	22178.5	27085.2	11222.4	7248.47	24305.8	10745.2	36124.3	9159.91	7908.84	10684.6	55997.7	38302.4	34314.6	36029.9	36620.4	4285.83	47464.6	13053.9	39765.5	52564.5	46211.7	44161.2	C00231
MW0112028	Suprofen	舒洛芬	Benzene and substituted derivatives	苯及其衍生物	Benzene and substituted derivatives	苯及其衍生物	C14H12O3S	2	0.6667	40828-46-4	TRUE	TRUE	TRUE	28285.5	25822.1	31063	34006.2	25717.3	32707.3	34135.2	30224.8	39977.9	36344.8	32710.1	33764.2	49206.5	44720.5	36361.1	39923.7	38379.2	27376.2	49396.8	31043.1	50469.1	50674.7	54127.6	56762.9	C07320
MW0125830	Nitrendipine	尼群地平	Heterocyclic compounds	杂环化合物	Heterocyclic compounds	杂环化合物	C18H20N2O6	2	0.8809	39562-70-4	FALSE	TRUE	TRUE	17159.6	19879.6	15479.4	17693.6	18554.1	20051.8	31573.5	33612.4	43629.9	30184.7	36520.2	37260.1	15770.2	18237.8	16178.4	15077	22694.6	27092.6	7215.27	5630.17	7260.54	5187.6	5068.13	6079.77	C07713
MW0108024	Lys-Trp-Lys	L-赖氨酸-L-色氨酸-L-赖氨酸	Amino acid and Its metabolites	氨基酸及其代谢物	Small Peptide	小肽	C23H36N6O4	2	0.8287	38579-27-0	TRUE	TRUE	TRUE	1139.62	750.026	1167.54	1700.31	1348.48	834.688	12912.3	16566.1	16169.1	14893.5	12975.5	11647	115.762	117.807	71.465	78.178	46.855	12.478	27.191	124.776	81.22	51.42	11.547	6.237	-
MW0004972	4-Fluoro-3-nitrobenzotrifluoride	4-Fluoro-3-nitrobenzotrifluoride	Benzene and substituted derivatives	苯及其衍生物	Benzene and substituted derivatives	苯及其衍生物	C7H3F4NO2	2	0.6744	367-86-2	FALSE	TRUE	TRUE	37818.1	36784.5	39550.6	45304.5	41662.3	42417.7	42353	41362.6	49480.1	43310.7	41842	40490.8	70427.1	69588.9	51096.3	49791.7	57754.3	32686	65951.8	39811.6	65950.6	66475.4	70074.6	69204.9	-
FDATN00416	Dinoprostone	前列腺素E2	Hormones and hormone related compounds	激素及激素相关物质	Hormones and hormone related compounds	激素及激素相关物质	C20H32O5	3	0.8178	363-24-6	FALSE	TRUE	TRUE	605.526	478.854	629.675	712.21	463.873	590.205	4753.69	5518.52	7690.13	7250.02	6856.3	6080.94	582.546	650.291	580.164	623.507	3868.1	414.995	1056.32	1372.87	1293.68	771.177	736.66	914.621	C05103
MW0144865	Rhamnose	鼠李糖	Carbohydrates and Its metabolites	碳水化合物及其代谢物	Sugars	糖类	C6H12O5	1	0.8584	3615-41-6	TRUE	TRUE	TRUE	252819	275999	321854	317185	268985	261707	312381	290673	366463	347500	342635	332961	389199	317181	368240	367139	360754	390560	574800	390656	555797	641287	587428	605041	C00507
MW0053743	Deoxycholic acid glycine conjugate	脱氧胆酸甘氨酸结合物	Organic acid and Its derivatives	有机酸及其衍生物	Organic acid and Its derivatives	有机酸及其衍生物	C26H43NO5	1	0.9007	360-65-6	TRUE	TRUE	TRUE	6081.87	6378.83	5970.13	6500.16	5798.89	4904.06	4550.28	5285.55	3709.21	4165.21	5847.95	4943.3	1009.11	1638.76	1636.46	899.104	1610.09	2005.42	2273.69	3711.21	2027.37	2587.54	1645.89	1171.44	C05464
MW0157935	Timepidium bromide	溴化溴铵	Alcohol and amines	醇、胺类	Amines	胺类	C17H22BrNOS2	3	0.6735	35035-05-3	TRUE	TRUE	TRUE	17151.2	15558.4	17456.9	17891	18634.2	16893.5	14039.5	14983.1	19742.9	16915.5	14639.8	14308.6	11245.3	11862.6	12194.2	12715	15384.2	17217.7	14395.7	15304.4	13353.4	10325.2	10850.4	11879.4	-
MW0160313	Sulfolithocholic acid	硫代胆酸	Organic acid and Its derivatives	有机酸及其衍生物	Organic acid and Its derivatives	有机酸及其衍生物	C24H40O6S	3	0.7884	34669-57-3	FALSE	TRUE	TRUE	156.564	64.497	99.86	49.203	651.239	381.199	13022.7	7894.69	11156.2	7928.58	8793.71	8488.26	85.06	48.461	405.173	27.641	128.276	33.926	37.894	131.06	33.914	17.606	45.413	109.734	-
MW0126592	L-Urobilin	L-尿胆素	Heterocyclic compounds	杂环化合物	Heterocyclic compounds	杂环化合物	C33H46N4O6	3	0.7957	34217-90-8	FALSE	FALSE	TRUE	3071.79	4382.47	5204.71	4483.58	11298.3	228.974	263.732	9128.86	107.015	10602.3	9492.83	7298.05	306.852	9135.08	2002.06	1904.55	89.509	2947.52	4406.9	3770.05	66.601	1607.07	60.382	288.497	C05793
MW0004531	4-[[4-(4-Chlorophenyl)-2-thiazolyl]amino]phenol	4-[[4-(4-氯苯基)-2-噻唑基]氨基]苯酚	Benzene and substituted derivatives	苯及其衍生物	Benzene and substituted derivatives	苯及其衍生物	C15H11ClN2OS	2	0.6856	312636-16-1	FALSE	TRUE	TRUE	20266.4	27293.8	35052.1	29633.7	22742.2	19406.7	17231.2	20813	21576.4	27217.5	27251.1	30425.3	45490.1	32850.9	44538.9	26076.5	28631.9	30019.7	60994.1	23804.9	73783.9	93424.3	76895.5	79393.5	-
MW0138787	Licoricidin	甘草素	Heterocyclic compounds	杂环化合物	Heterocyclic compounds	杂环化合物	C26H32O5	2	0.634	30508-27-1	FALSE	TRUE	TRUE	48.103	16.81	3.539	6.192	1.673	75.048	5.88	40.228	95.736	55.893	46.889	82.614	11.078	143.093	7.126	146.173	11.016	13.998	148.442	93.184	95.342	74.439	152.71	99.378	C16986
MW0119612	3-Hydroxy-3-methyloxindole	3-甲基二氧吲哚	Heterocyclic compounds	杂环化合物	Indole and Its derivatives	吲哚及其衍生物	C9H9NO2	2	0.9269	3040-34-4	FALSE	TRUE	TRUE	19421.3	22495.9	20251.8	20966.9	19744.4	22569.2	22837.2	24092.4	25695.5	22783.9	19908.4	20002	23641.8	20986.4	16501.9	19784.4	19915.3	19789.6	18691.9	17637.4	19311.3	20739.5	20176.4	20252.3	C05834
MW0062382	Dipalmitoylphosphatidylserine	二棕榈酰磷脂酰丝氨酸	GP	甘油磷脂类	PS	磷脂酰丝氨酸	C38H74NO10P	2	0.6151	3036-82-6	TRUE	TRUE	TRUE	27584.8	45677	72213.7	104381	86753	87755.2	97480.6	112523	128575	90422.8	107821	115953	24459.2	38021.4	18091.7	25180.8	29366.9	17861.6	99691.1	75445	88824.9	83837.6	31816.9	80155.7	-
MEDN1086	FFA(22:4)	FFA(22:4)	Organic acid and Its derivatives	有机酸及其衍生物	Organic acid and Its derivatives	有机酸及其衍生物	C22H36O2	1	0.6816	28874-58-0	FALSE	TRUE	TRUE	724.423	693.283	1207.24	1346.12	992.932	658.718	112181	103821	103919	49787.4	59058.8	65411.7	988.12	388.856	533.681	191.32	1026.88	1107.32	3833.34	2943.74	4503.17	1977.53	2265.11	1598.29	C16527
MW0063578	2-(((R)-2,3-Dihydroxypropyl)phosphoryloxy)-N,N,N-trimethylethanaminium	甘油-3-磷酸胆碱	GP	甘油磷脂类	PC	磷脂酰胆碱	C8H21NO6P+	2	0.9321	28319-77-9	FALSE	TRUE	TRUE	15155	21453.6	29952.2	18090.4	34984.4	38849.3	27000.6	31431.5	22494.4	50449.2	34118.3	41556.1	21507.7	25117.6	13883.2	20062.6	5367.54	7880.08	19376.3	5246.77	19130.3	18685.6	20121.2	23728.2	C00670
MW0014129	3-Hydroxytetradecanoylcarnitine	3-羟基十四烷酰基肉碱	Organic acid and Its derivatives	有机酸及其衍生物	Organic acid and Its derivatives	有机酸及其衍生物	C21H41NO5	3	0.803	282523-64-2	FALSE	TRUE	TRUE	9208.26	8581.33	10792.5	10633.6	9523.08	10235.4	107340	130837	138655	134036	118079	115511	11185.9	11469.9	5586.32	5836.07	15.562	6124.38	9932.46	9459.57	13352.4	8625.19	7267	5663.95	-
MW0005071	4-Chloro-4'-hydroxybiphenyl	4-氯-4′-联苯酚；4-氯-4′-羟基联苯	Benzene and substituted derivatives	苯及其衍生物	Benzene and substituted derivatives	苯及其衍生物	C12H9ClO	2	0.7159	28034-99-3	TRUE	TRUE	TRUE	35194.4	40716	46961.6	47503.3	39704.8	37607.3	44921.6	24562.6	51313.9	49136.7	49967	48284.3	60103.2	48608.9	55645.1	55783.9	50882.5	57976.9	76582.4	48342.4	81331.9	85562.8	90134.9	89272.9	-
MW0015362	8-Oxohexadecanoic acid	8-氧代十六烷酸	FA	脂肪酰类	Oxidized lipids	氧化脂质	C16H30O3	3	0.8053	2777-52-8	TRUE	TRUE	TRUE	186.092	218.785	249.398	205.715	161.201	129.347	10726.6	11796.6	11532.7	8250	7896.95	7785.48	62.032	124.268	125.185	89.954	77.302	89.92	195.54	58.267	43.258	47.168	29.138	60.352	-
MEDP0495	LPC(0:0/18:2)	溶血PC(0:0/18:2(9Z,12Z))	GP	甘油磷脂类	LPE	溶血磷脂酰乙醇胺	C26H50NO7P	1	0.9608	27304-12-7	FALSE	TRUE	TRUE	86508.8	83262	104794	133562	117921	101642	315500	506522	668565	616150	542479	509310	120521	145584	88353.3	63882.7	79434.8	76787.6	109956	253126	161214	130875	122017	109867	-
MW0113062	4-Hydroxy-3-(3-methyl-2-butenyl)acetophenone	3-异戊二烯基-4-羟基苯乙酮	Aldehyde,Ketones,Esters	醛、酮、酯类	Ketones	酮类	C13H16O2	2	0.6353	26932-05-8	TRUE	FALSE	TRUE	3246.13	7509.1	7701.66	8119.16	5315.63	6452.23	3254.59	3193.3	2558.89	4000.71	3178.92	3064.42	3887.46	2923.49	3204.6	1638.92	2354.81	2641.43	1627.67	1143.12	2572.55	3126.07	4046.72	2010.64	C10702
MW0058121	1-Palmitoyl-2-oleoyl-sn-glycero-3-phosphoethanolamine	1-棕榈酰基-2-油酰基-sn-甘油-3-磷酸乙醇胺	GP	甘油磷脂类	PE	磷脂酰乙醇胺	C39H76NO8P	2	0.5709	26662-94-2	FALSE	TRUE	TRUE	7066.21	8947.85	13028.2	14071.7	14581.1	21822.8	10148.7	17452.5	22692.4	19775.1	19403.5	27160.8	15649.4	10940.9	9943.51	5780.85	2667.3	7494.35	18736	9464.06	12614.6	9489.79	7803.96	5809.52	-
MW0137394	Apiin	阿皮因	Flavonoids	黄酮	Flavonoid	黄酮	C26H28O14	2	0.7205	26544-34-3	TRUE	TRUE	TRUE	150.5	298.425	441.178	264.847	227.115	254.469	8260.48	5414.62	6771.19	7106.88	6573.31	5687.62	10.076	30.989	43.112	280.394	20.758	9.378	118.679	19.406	38.796	61.801	998.437	416.671	C04858
MW0015404	9,10-DHOME	-	FA	脂肪酰类	Oxidized lipids	氧化脂质	C18H34O4	3	0.6281	263399-34-4	FALSE	TRUE	TRUE	417.219	256.352	300.993	367.049	297.948	268.315	20413.6	20047.6	20446.3	16037.2	16033.4	14350.8	263.347	624.741	323.908	160.65	220.021	293.717	400.564	505.952	322.094	376.118	242.048	461.257	-
MW0063596	Sorbitan, monohexadecanoate	山梨糖醇单十六酸酯	FA	脂肪酰类	Others	其他	C22H42O6	2	0.7028	26266-57-9	TRUE	TRUE	TRUE	22815.1	16647.7	21008.3	23803.1	22273	18171.5	127058	170743	166589	156296	136522	120630	96.567	205.557	13133.8	63.126	11954.9	15400.8	47626.2	44665.9	43849	38990.4	194.521	47879.8	-
MEDL02773	Indoleacetaldehyde	吲哚-3-乙醛	Heterocyclic compounds	杂环化合物	Indole and Its derivatives	吲哚及其衍生物	C10H9NO	1	0.9462	2591-98-2	TRUE	TRUE	TRUE	27034.1	26016.2	26982.6	25358	25235.8	26866.5	64678.1	55415.7	72152.4	70902.6	73495	68074.5	18731.2	18438.5	18563.3	17401.8	22841.9	24728.9	39130.3	40102.1	37578.8	33337.1	33450.5	36261.4	C00637	1.65082
MEDL02162	FFA(22:5)	二十二碳五烯酸	FA	脂肪酰类	FFA	游离脂肪酸	C22H34O2	1	0.7199	24880-45-3	FALSE	TRUE	TRUE	9570.88	9845.5	15017.1	19101	15322	11810.1	273734	253693	220222	152886	126770	129967	12138.6	8033.34	8839.93	4438.91	13903.5	12032.9	29738.2	26007.7	23437.5	18446.6	19041.9	16122	C16513
MW0194137	8Z,11Z,14Z,17Z-eicosatetraenoic acid	8Z,11Z,14Z,17Z-eicosatetraenoic acid	FA	脂肪酰类	Oxidized lipids	氧化脂质	C20H32O2	1	0.964	24880-40-8	TRUE	TRUE	TRUE	162983	118206	161825	234914	252707	141038	1.17236e+06	1.3363e+06	1.17152e+06	539128	487270	436370	109677	96518.6	88061.7	51090.4	145636	117903	191562	158934	137352	138045	110409	101416	-
MW0126012	Oxypurinol	羟嘌醇	Heterocyclic compounds	杂环化合物	Heterocyclic compounds	杂环化合物	C5H4N4O2	3	0.9297	2465-59-0 | 184764-63-4 | 187486-05-1 | 187486-06-2	TRUE	FALSE	TRUE	176.645	217.806	118.39	56.176	56.157	22.432	239.526	112.419	16.788	88.153	219.01	118.779	261.964	302.146	118.838	125.369	496.603	312.164	260.85	114.449	251.469	341.856	115.432	305.706	C07599
MEDN1078	Epoxyoleic acid	顺-DL-9,10-环氧硬脂酸	FA	脂肪酰类	FFA	游离脂肪酸	C18H34O3	1	0.8963	24560-98-3	FALSE	TRUE	TRUE	19317.5	9719.63	12280	15323.7	13496.9	10591.5	123040	155627	134901	82153.9	89125	80233	14113.4	13132.3	9968.84	7667.3	12395.8	12146.2	16344.4	6867.8	15211.7	12652.5	7224.01	5509.05	-
MW0005831	6-Methoxy-2-naphthylacetic acid	6-甲氧基萘乙酸	Benzene and substituted derivatives	苯及其衍生物	Benzene and substituted derivatives	苯及其衍生物	C13H12O3	2	0.7232	23981-47-7	TRUE	FALSE	TRUE	150947	140438	151628	173700	155300	152686	159376	161903	200976	168493	166228	153731	135915	164675	117471	115012	130785	128724	153064	149643	159966	157180	164307	164273	-
MW0002865	2-Chloro-4-biphenylol	2-氯-4-联苯酚	Benzene and substituted derivatives	苯及其衍生物	Benzene and substituted derivatives	苯及其衍生物	C12H9ClO	2	0.5349	23719-22-4	TRUE	FALSE	TRUE	18231.6	62069.4	66102.1	55590.9	65711.1	51724	9677.77	88338.1	18137.8	72937.6	13447.7	24397.8	156165	198822	70179.9	123198	76871.7	57111.3	41508.8	79970.1	141483	241909	72658.8	80106.5	-
MW0014242	3-Oxocholic acid	3-氧代胆酸	Organic acid and Its derivatives	有机酸及其衍生物	Organic acid and Its derivatives	有机酸及其衍生物	C24H38O5	2	0.5425	2304-89-4	TRUE	TRUE	TRUE	1514.04	1674.8	1970.37	1857.83	1125.02	725.937	18993.9	22650.1	21220.8	24590.3	21087.2	19690.1	119.647	271.74	58.173	92.985	54.185	14.96	29.412	134.963	108.833	39.024	8.994	17.707	-
MW0054403	Loganic acid	洛康酸	Organic acid and Its derivatives	有机酸及其衍生物	Organic acid and Its derivatives	有机酸及其衍生物	C16H24O10	2	0.7047	22255-40-9	FALSE	FALSE	TRUE	24225.1	19013.8	19671.5	28163.6	20457.5	23988.5	25036.3	20519.1	31671.7	25945.1	21047.1	19360.8	16197.6	26913.5	18762.8	15276	18388.1	9705.22	17353.1	20967.6	24780.5	20526.7	18524.3	20629.7	C01512
MW0124336	Hydroxyatrazine	羟嗪	Heterocyclic compounds	杂环化合物	Heterocyclic compounds	杂环化合物	C8H15N5O	3	0.7601	2163-68-0	FALSE	TRUE	TRUE	48.352	48.097	52.556	67.147	101.953	185.745	2874.69	2717.79	2296.98	3141.57	2896.92	2661.09	70.173	138.641	95.612	22.046	40.13	88.206	66.623	159.527	186.828	108.056	110.18	105.816	C06552
MW0103639	Orotidylic acid	乳清酸	Nucleotide and Its metabolites	核苷酸及其代谢物	Nucleotide and Its metabolites	核苷酸及其代谢物	C10H13N2O11P	2	0.7729	2149-82-8	TRUE	TRUE	TRUE	206259	209697	223563	214599	212170	203653	178633	164674	202778	189885	201952	169216	162056	172438	175744	171132	199601	224370	165564	173471	149221	91881.7	143244	154259	C01103
MW0057056	PC(18:2(9Z,12Z)/18:3(6Z,9Z,12Z))	PC(18:2(9Z,12Z)/18:3(6Z,9Z,12Z))	GP	甘油磷脂类	PC	磷脂酰胆碱	C44H78NO8P	3	0.5556	203393-41-3	FALSE	FALSE	TRUE	121971	24272.4	35269.4	63156.5	79208.5	71319.3	64349.2	51589	57124.1	61449.7	74666.7	50038.5	36621.5	29092.5	7102.38	40373.8	40339.9	40446	61532.8	56255.7	5981.62	28879.8	31230.3	88472.8	-
MW0143587	5-Chloro-3-(4-methylsulfonylphenyl)-2-pyridin-3-ylpyridine	5-氯-3-(4-甲基磺酰基苯基)-2-吡啶-3-基吡啶	Heterocyclic compounds	杂环化合物	Heterocyclic compounds	杂环化合物	C17H13ClN2O2S	3	0.6817	202409-31-2	FALSE	TRUE	TRUE	86293.8	107846	140301	129889	81058.7	82113.1	119814	85014.2	102569	86153.5	116435	130952	188527	136103	180180	173355	71719.2	127888	252865	99445.2	311633	358838	339916	344827	-
MW0149077	Eupachloroxin	泽兰氧化氯内酯	Heterocyclic compounds	杂环化合物	Heterocyclic compounds	杂环化合物	C20H25ClO8	3	0.7644	20071-52-7	FALSE	TRUE	TRUE	46700.7	46905.6	47048.6	53623.8	48344.1	46878.7	41942.6	45695.3	48778.9	46979.7	42554	43845.4	58366	55700.2	39655.8	43587.9	39692.3	30416.2	29095.7	20256.3	32082.3	27258.6	32812.7	37959.5	C09425
MW0147019	Callystatin A	加利他汀 A	Heterocyclic compounds	杂环化合物	Heterocyclic compounds	杂环化合物	C29H44O4	3	0.6819	189883-16-7	TRUE	TRUE	TRUE	5758.08	4962.28	6942.41	7402.18	7334.77	4827.86	229.458	234.331	167.433	168.735	239.761	135.992	913.65	52.205	17.853	1048.59	12.961	38.962	327.412	325.488	315.968	311.42	356.355	260.72	C16891
MW0105040	3-Hydroxydodecanoic acid	3-羟基十二烷酸	Organic acid and Its derivatives	有机酸及其衍生物	Organic acid and Its derivatives	有机酸及其衍生物	C12H24O3	3	0.8368	1883-13-2 | 53941-38-1	TRUE	TRUE	TRUE	1695.16	1327.37	1505.47	1731.18	1280.94	1343.06	18431.5	22630.8	18514.3	21275.5	22048.8	17611.7	1435.52	917.681	1165.14	864.492	1180.25	569.033	5130.3	2296.46	4488.73	4047.19	3505.12	5042.1	-
MW0114283	Diprogulic Acid	双丙戊酸	Organic acid and Its derivatives	有机酸及其衍生物	Organic acid and Its derivatives	有机酸及其衍生物	C12H18O7	2	0.666	18467-77-1 | 68539-16-2	TRUE	TRUE	TRUE	36823.4	34309.2	37375.7	46899.1	41058.4	35600.5	30406.8	39830.9	40771.3	40557.4	32951.7	29957.3	24811.8	32499.5	28924.5	25300.3	28251.3	36814.7	25450.6	29134.7	24440.6	25531.7	25695.6	22803.7	C18825
MW0015869	Arachidonoyl Serinol	N-花生四烯酸二羟丙胺	FA	脂肪酰类	Others	其他	C23H39NO3	2	0.9293	183718-70-9	FALSE	TRUE	TRUE	6143.73	5308.84	6833.17	7379.6	2788.34	5227.86	98845.2	127651	124790	104358	102525	97709.2	10405.5	5081.28	4385.32	3425.48	4122.15	4354.71	4780.48	11165.5	8468.36	7007.87	7609.45	3998.03	-
MW0114852	Methyl beta-D-galactopyranoside	甲基β-D-半乳糖苷;甲基β-D-半乳糖吡喃糖苷	Carbohydrates and Its metabolites	碳水化合物及其代谢物	Carbohydrates and Its metabolites	碳水化合物及其代谢物	C7H14O6	1	0.5798	1824-94-8	FALSE	TRUE	TRUE	138192	133694	141668	164998	143000	145248	128640	143613	168838	142231	148399	125098	156879	158167	123270	128111	134550	116192	113332	99474.5	119631	115059	124109	120381	C03619
MW0154040	Myxochelin C	粘液螯合素C	Benzene and substituted derivatives	苯及其衍生物	Benzene and substituted derivatives	苯及其衍生物	C27H29N3O9	3	0.5951	179751-76-9	FALSE	TRUE	TRUE	20255	21774	24825	26217.9	22653.4	24344.8	22116.4	25605.4	22429.3	21192.5	20760.3	18111.1	27952	26476.2	19567.5	20170.2	20154	12941.4	11918.3	9421.37	11508.6	13761.1	13414.4	12295.1	C06450
MW0006716	D-Aspartic acid	D-天冬氨酸	Organic acid and Its derivatives	有机酸及其衍生物	Organic acid and Its derivatives	有机酸及其衍生物	C4H7NO4	3	0.906	1783-96-6	TRUE	TRUE	TRUE	385.833	307.821	439.711	366.601	176.724	157.233	4560.58	4471.99	3986.79	4278.94	3307.5	5381.71	481.022	580.721	860.317	580.556	830.315	440.195	19305.6	13294.8	20010	19058.8	19286.3	20773.7	C00402
MW0004094	3-Methoxy-4-hydroxyphenylglycolaldehyde	3-甲氧基-4-羟基苯乙醇醛	Benzene and substituted derivatives	苯及其衍生物	Phenolics	苯酚类	C9H10O4	3	0.9507	17592-23-3	TRUE	FALSE	TRUE	17179.9	15751.7	14336	15278.5	13302.9	14905.6	1198.31	1556.28	1922.72	828.23	1621.53	923.53	3736.97	3723.01	4630.51	4444.91	5158.8	6425.69	123.174	55.051	108.111	125.284	95.506	3282.66	C05583
MW0120156	4-[N-(p-Coumaroyl)serotonin-4''-yl]-N-feruloylserotonin	4-[N-(p-Coumaroyl)serotonin-4''-yl]-N-阿魏酰5-羟色胺	Tryptamines,Cholines,Pigments	色胺、胆碱、色素	Tryptamines	色胺	C39H36N4O7	3	0.6769	175702-02-0	FALSE	FALSE	TRUE	2400.44	6571.26	7386.47	9818.84	16474.2	5213.04	2116.12	10184.2	4306.74	10168.4	6259.67	6062.25	1914.46	7792.26	3693.8	4302.73	4834.01	5229.56	6661.81	7241.86	1933.29	4630.34	1364.77	1945.34	-
MEDP2280	4-[4-(2,3-Dihydro-1,4-benzodioxin-6-YL)-3-methyl-1H-pyrazol-5-YL]-6-ethylbenzene-1,3-diol	CCT-018159	Benzene and substituted derivatives	苯及其衍生物	Benzene and substituted derivatives	苯及其衍生物	C20H20N2O4	2	0.729	171009-07-7	FALSE	TRUE	TRUE	285418	281310	304408	337839	304994	293381	345200	325208	391744	327895	341984	331820	327288	353665	273953	270615	268369	223769	268065	195584	263440	249207	272947	282109	-
MW0103548	dTDP-4-dehydro-6-deoxy-alpha-D-glucose	DTDP-4-氧代-6-脱氧-D-葡萄糖；DTDP-4-脱氢-6-脱氧-D-葡萄糖；dTDP-4-脱氢-6-脱氧-α-D-葡萄糖；DTDP-4-脱氢-6-脱氧-α-D-吡喃葡萄糖；dTDP-4-氧代-6-脱氧-α-D-葡萄糖；dTDP-4-脱氢-6-脱氧-α-D-半乳糖；DTDP-4-脱氢-6-脱氧-D-半乳糖；DTDP-6-脱氧-D-木糖-己糖-4-酮糖；DTDP-6-脱氧-D-木糖-4-己酮糖；4，6-二脱氧-4-氧代-DTDP-D-葡萄糖	Nucleotide and Its metabolites	核苷酸及其代谢物	Nucleotide and Its metabolites	核苷酸及其代谢物	C16H24N2O15P2	3	0.6239	16752-71-9	TRUE	TRUE	TRUE	9724.59	7063.92	10130.2	12293.6	14753.2	12854.4	3327.24	3657.99	2724.92	2366.24	4053.57	5569.69	13586.6	18158.3	23632.8	18528	23028.4	16304.3	38054	24248.3	43245.4	47526.5	51437.5	77674.2	C11907
MW0015049	6-Ketomyristic acid	6-酮肉豆蔻酸	Hormones and hormone related compounds	激素及激素相关物质	Hormones and hormone related compounds	激素及激素相关物质	C14H26O3	3	0.6142	1619-89-2	FALSE	TRUE	TRUE	1683.83	1117.77	1629.72	3503.72	2340.48	2305.7	7500.52	10321.9	6511.99	8339.19	7293.54	5970.53	1498.78	2811.52	1094.87	2490.03	2538.95	3115.79	1788.49	2501.06	1835.66	1655.42	1519.96	2058.75	-
MW0052866	Oleic estolide	-	FA	脂肪酰类	FFA	游离脂肪酸	C36H68O4	2	0.8145	154086-90-5	FALSE	TRUE	TRUE	6387.36	6185.21	8177.52	5607.28	6990.97	6678.46	19850.8	17320.7	17665	15311.5	12023.2	13352.1	4911.74	1894.01	3978.41	3517.53	7078.2	6475.53	946.806	1993.41	2342.95	211.18	520.932	1768.87	-
MW0006786	Dichlorprop-P	（R)-(2，4-二氯苯氧基）丙酸酯；（R)-二氯丙酸	Benzene and substituted derivatives	苯及其衍生物	Benzene and substituted derivatives	苯及其衍生物	C9H8Cl2O3	2	0.745	15165-67-0	TRUE	TRUE	TRUE	58270	54701.3	62592.9	67631.1	64870.3	57403.5	60540.9	62008.1	76405.4	63919.5	61452.1	57300	178679	156943	117923	121923	129033	48927.8	154764	59721	147012	153092	170415	155864	C20685 | C72877
MW0161649	(1R,10R,12S,17R)-5-amino-11,11,14-trihydroxy-14-oxo-13,15,18-trioxa-2,4,6,9-tetraza-14lambda5-phosphatetracyclo[8.8.0.03,8.012,17]octadeca-3(8),5-dien-7-one	-	Others	其他	Others	其他	C10H14N5O8P	3	0.8689	150829-29-1	TRUE	FALSE	TRUE	178337	121101	130550	118334	116846	135659	69578.1	48231.6	65034	89046	93827.4	69645.5	60857.1	74651.3	85078.9	71442.7	103889	88001.4	37015.5	84125.7	90216	47190.9	51851.7	52944.3	C18239
MW0170020	Xanthosine	黄嘌呤核苷	Nucleotide and Its metabolites	核苷酸及其代谢物	Nucleotide and Its metabolites	核苷酸及其代谢物	C10H12N4O6	1	0.9634	146-80-5	TRUE	TRUE	TRUE	51850.5	45936.3	55247.6	53103.8	49555.3	50922.5	185741	164163	141725	170297	167834	175252	13215.9	12883.3	13799.6	13163.7	12590.5	17411.1	58855.1	51185.6	53135.9	59372.4	57528.8	57472.1	C01762	3.11837
MW0115839	(2E)-3-(1H-indol-2-yl)prop-2-enoic acid	吲哚丙烯酸	Organic acid and Its derivatives	有机酸及其衍生物	Organic acid and Its derivatives	有机酸及其衍生物	C11H9NO2	3	0.7753	143618-94-4 | 606493-58-7	TRUE	TRUE	TRUE	7588.54	6653.18	6030.74	7500.6	8130.38	6213.61	7580.07	7831.54	10484.5	8361.15	8279.18	8409.63	5390.21	5093.74	4498.95	4433.35	4700.46	6240.86	5451.36	6634.02	7094.29	6926.91	7233.32	7353.32	-
MW0126097	Phenol red	酚红	Heterocyclic compounds	杂环化合物	Heterocyclic compounds	杂环化合物	C19H14O5S	3	0.8597	143-74-8	FALSE	FALSE	TRUE	362396	330029	354568	347097	349780	360629	268659	269840	370280	324674	329908	289626	237609	250422	269258	264656	331288	397208	283412	314211	244870	232965	236390	267649	-
MW0105037	3-Hydroxydecanoic acid	3-羟基癸酸	Organic acid and Its derivatives	有机酸及其衍生物	Organic acid and Its derivatives	有机酸及其衍生物	C10H20O3	3	0.8782	14292-26-3 | 5561-87-5 | 33044-91-6	TRUE	TRUE	TRUE	1529.91	1204.59	1528.4	1483.64	1094.71	1169.59	10269.6	11754.7	10784.7	12546.7	12216.5	9905.88	970.089	1137.02	918.198	1069.81	1047.33	1063.44	1672.99	1319.55	1544.74	1170.35	1205.44	1757.47	-
MW0123158	Brinzolamide	布林佐胺	Alcohol and amines	醇、胺类	Amines	胺类	C12H21N3O5S3	2	0.6633	138890-62-7	FALSE	TRUE	TRUE	37978.7	40181.4	40478.7	50949.6	41077.9	42073.8	58066.5	37508.4	46471.5	32689.3	44239.8	34477.4	40503.3	44940.2	33009.3	35367.2	38076.1	38785.9	28708.9	31400.9	23005.9	31246.4	30450.5	34066	C07760
MW0160970	(2S)-2-azaniumyl-3-phenylpropanoate	-	Aldehyde,Ketones,Esters	醛、酮、酯类	Esters	酯类	C9H11NO2	3	0.9217	136019-12-0	FALSE	TRUE	TRUE	1295.97	1727.21	2143.45	2579.91	2626.35	1596.8	3365.2	3638.55	2315.71	2099.14	2949.44	2928.32	1540.35	2089.1	1191.97	1350.5	1386.08	1126.95	840.972	1092.28	1153.59	685.251	381.198	595.571	-
MW0106750	Galactonic acid	半乳糖酸	Carbohydrates and Its metabolites	碳水化合物及其代谢物	Carbohydrates and Its metabolites	碳水化合物及其代谢物	C6H12O7	2	0.648	13382-27-9	FALSE	FALSE	TRUE	851118	878259	913640	1.04043e+06	1.08908e+06	1.02137e+06	757206	1.04778e+06	1.29851e+06	1.08665e+06	1.00232e+06	734701	509403	1.08904e+06	674601	625279	834601	994750	832829	1.00752e+06	714561	672877	779060	803972	C00880
MW0103684	Uridine-5'-diphosphate-glucose	UDP葡萄糖	Nucleotide and Its metabolites	核苷酸及其代谢物	Nucleotide and Its metabolites	核苷酸及其代谢物	C15H24N2O17P2	1	0.8133	133-89-1	FALSE	TRUE	TRUE	3.27357e+06	3.26037e+06	3.98424e+06	1.87748e+06	3.2902e+06	3.54445e+06	1.22798e+06	950506	304174	304783	1.15286e+06	2.0415e+06	4.82246e+06	5.11745e+06	5.49489e+06	5.01591e+06	1.57106e+06	886857	1.19851e+07	1.47521e+06	1.17507e+07	1.23341e+07	1.23572e+07	3.65633e+06	C00029
MW0103600	Inosinic acid	肌苷酸	Nucleotide and Its metabolites	核苷酸及其代谢物	Nucleotide and Its metabolites	核苷酸及其代谢物	C10H13N4O8P	1	0.9313	131-99-7 | 30918-54-8 | 25249-22-3	TRUE	TRUE	TRUE	2.38189e+06	2.49892e+06	2.48537e+06	2.66979e+06	2.25674e+06	2.30028e+06	1.81259e+06	1.68465e+06	1.83678e+06	2.00362e+06	1.5646e+06	1.84753e+06	1.61447e+06	618144	747314	1.9014e+06	1.46971e+06	1.47368e+06	1.28501e+06	697463	754198	999877	533579	1.19335e+06	C00130	1.90716
MW0113863	2'-Adenylic acid	腺苷-2'-磷酸	Nucleotide and Its metabolites	核苷酸及其代谢物	Nucleotide and Its metabolites	核苷酸及其代谢物	C10H14N5O7P	2	0.9457	130-49-4 | 81012-86-4	TRUE	TRUE	TRUE	331470	269569	546022	535779	359696	426818	109242	132311	57758.4	95335.9	98202.6	115465	45504.1	407056	234095	136410	14309	61633.1	18435.4	47968.7	65004.7	38857.1	42539.5	6458.43	C00946
FDATN00594	Sulfacetamide sodium	Sulfacetamide Sodium	Others	其他	Medicine	药物	C8H9N2NaO3S	3	0.753	127-56-0	FALSE	TRUE	TRUE	61332.7	63502.4	32918.4	47319.7	58085.3	64457.6	39242.9	47300.9	46050.5	46783.7	49048.7	49825.4	25028.3	74672.8	44823.1	47047.7	58079.4	34202.3	23139.4	25421.7	41245.2	33915.8	12159.7	15381.1	C08051
MW0149874	Glutaminyl-arginine	Gln Arg	Amino acid and Its metabolites	氨基酸及其代谢物	Small Peptide	小肽	C11H22N6O4	2	0.8278	126590-89-4	FALSE	TRUE	TRUE	173.294	206.884	179.359	353.351	837.799	540.189	779.245	297.394	1776.43	240.3	385.432	442.663	2286.72	799.664	625.207	745.354	359.698	587.809	1509.45	786.185	1716.15	1153.48	1961.53	1263.77	-
MW0002614	Tyrphostin A51	酪氨酸蛋白 A51	Benzene and substituted derivatives	苯及其衍生物	Phenolics	苯酚类	C13H8N4O3	2	0.6823	126433-07-6 | 122520-90-5	TRUE	TRUE	TRUE	5418.92	5453.19	11711	8672.78	7891.88	2488.02	8848.82	6908.88	8147.54	8278.88	9051.05	9770.65	15504.8	11022.3	14622.3	14092.5	9030.49	10490.4	18941.5	6752.78	24333.9	31552.1	15320.1	12456	-
MW0062173	Prephenic acid	预苯酸	Organic acid and Its derivatives	有机酸及其衍生物	Organic acid and Its derivatives	有机酸及其衍生物	C10H10O6	3	0.7793	126-49-8 | 87664-40-2	FALSE	FALSE	TRUE	1427.32	932.243	1014.52	1410.55	921.067	1219.57	725.647	835.448	772.339	1184.41	1122.88	1338.59	1277.3	1148.69	895.092	1231.13	499.132	536.462	456.969	407.295	853.578	1044.14	898.928	366.287	C00254
MW0103500	Clofarabine	氯法拉滨	Nucleotide and Its metabolites	核苷酸及其代谢物	Nucleotide and Its metabolites	核苷酸及其代谢物	C10H11ClFN5O3	2	0.63	123318-82-1	FALSE	TRUE	TRUE	89517.4	82402.6	89086	95873.7	86763.2	89769.9	83166.6	86831.6	114795	88943.9	91386.2	80947.7	90889	96525.2	83089.3	80308	103497	88938.2	64806.4	71242.2	63564.6	66825.7	66256.2	66483.6	-
MW0143501	Icosa-5,14-dienoic acid	二十碳五，14-二烯酸	Organic acid and Its derivatives	有机酸及其衍生物	Organic acid and Its derivatives	有机酸及其衍生物	C20H36O2	2	0.6218	122055-58-7	TRUE	TRUE	TRUE	420.5	505.344	728.659	812.731	338.512	432.683	9238.39	9394.19	10107.6	10384.1	8792.92	8015.95	177.938	303.832	159.646	246.881	267.185	432.65	265.685	114.68	469.027	261.9	180.33	255.06	-
MW0055248	N-Arachidonoyl Taurine	N-花生四烯酸牛磺酸	FA	脂肪酰类	FFA	游离脂肪酸	C22H37NO4S	2	0.9241	119959-65-8	TRUE	TRUE	TRUE	2932.41	2900.62	4453.68	4023.16	3546.37	2671.32	51824	61947.8	58981.1	48157.6	40963.9	40655.6	12520.8	12419.4	11297.2	10726.4	11623.7	19828.3	2942.45	3322.94	592.056	648.241	3022.86	1094.96	-
MW0125869	N-Nitrosothialdine	N-亚硝基噻吩	Heterocyclic compounds	杂环化合物	Heterocyclic compounds	杂环化合物	C6H12N2OS2	3	0.5246	114375-58-5	TRUE	TRUE	TRUE	8258.82	8523.33	8394.73	7627.77	6809.9	7572.1	13954.3	11512.3	7920.81	10775.5	11646.3	13263.2	4008.41	5923.49	5900.53	6498.32	5537.4	6657.68	8497.58	8610.13	6727.32	7814.09	5223.8	8473.44	-
MW0103486	Nicotinamide mononucleotide	烟酰胺单核苷酸	Nucleotide and Its metabolites	核苷酸及其代谢物	Nucleotide and Its metabolites	核苷酸及其代谢物	C11H15N2O8P	3	0.5349	1094-61-7	FALSE	TRUE	TRUE	66585.7	72650.8	80601.4	74688.3	65474.2	67765.1	400336	377691	312091	504189	376564	437789	72728.7	70755.9	51090.2	74624.5	45136.7	24577.4	47068.9	27557	62595.8	50994.5	51938.2	59804.7	C00455
MW0108714	N-Caffeoyltryptophan	N-咖啡酰色氨酸	Amino acid and Its metabolites	氨基酸及其代谢物	Amino acid derivatives	氨基酸衍生物	C20H18N2O5	3	0.6795	109163-69-1	TRUE	TRUE	TRUE	44401.2	40727.3	50515.9	46372.9	41300.3	43138.8	66233.1	72668.3	80885.5	80059.8	70111.6	67385.4	47447.8	57189.1	56192.9	52151.4	53328.8	63310.5	22823.2	29502.2	21688.3	21346.3	22860.5	24650.6	-
MW0000212	Cytochalasin Opho	细胞松弛素 Opho	Hormones and hormone related compounds	激素及激素相关物质	Hormones and hormone related compounds	激素及激素相关物质	C28H37NO4	3	0.6188	108050-26-6	FALSE	TRUE	TRUE	283068	445183	389853	480493	402416	508255	379737	445940	341658	468074	182919	135432	460300	607939	406015	341680	312611	254581	613250	392410	669783	675371	527857	721202	-
MW0010504	Anwulignan	安武里尼昂	Lig-s and Coumarins	木脂素和香豆素	Lig-s	木脂素	C20H24O4	2	0.653	107534-93-0	TRUE	TRUE	TRUE	66170.4	61268.9	63027.5	66997.1	64834.2	56145.4	52099.9	61918.2	61596.2	62123.7	53272.7	51154.5	42308.8	50614.6	49675	44889	45210.6	57149.3	42571.6	36210.5	32281.5	33938	36383.6	37783.8	-
MW0103082	(2R,3R,6R)-2,3-dihydroxy-6-[(3R,5R,8R,9S,10S,13R,14S,17R)-3-hydroxy-10,13-dimethyl-2,3,4,5,6,7,8,9,11,12,14,15,16,17-tetradecahydro-1H-cyclopenta[a]phenanthren-17-yl]heptanoic acid	戊酸	Bile acids	胆汁酸	Bile acids	胆汁酸	C26H44O5	3	0.5547	1061-64-9	TRUE	TRUE	TRUE	209436	176964	234375	187303	187970	185860	539343	611022	616702	634060	543228	544884	45391.9	57023	52532.4	51307.6	55996.3	48299.4	212802	205471	222887	263276	269489	228845	-
MW0137425	Ascomycin	子囊霉素	Heterocyclic compounds	杂环化合物	Heterocyclic compounds	杂环化合物	C43H69NO12	2	0.7075	104987-12-4 | 11011-38-4	FALSE	FALSE	TRUE	47564.9	32890.1	36529.6	29820.9	46069.5	61075.3	62521.6	13790.3	31528.8	13583.1	16656.7	43863.9	120712	126814	39355.8	54063.1	60647.2	30470	33077.1	64577	106093	43657.1	31557.5	52108.9	-
MW0011183	(3beta,22E,24R)-Ergosta-4,6,8(14),22-tetraen-3-ol	-	Alcohol and amines	醇、胺类	Alcohols	醇类	C28H42O	3	0.8379	104729-39-7	TRUE	TRUE	TRUE	207.679	431.539	350.145	405.397	318.414	568.261	7504.72	10292.4	9522.72	8531.76	7912.08	9018.52	15.427	449.677	23.975	27.362	14.244	12.291	106.461	918.178	11.969	414.632	29.177	773.137	-
MW0005290	4-Nonylphenol	4-壬基苯酚	Benzene and substituted derivatives	苯及其衍生物	Phenolics	苯酚类	C15H24O	2	0.9446	104-40-5	FALSE	FALSE	TRUE	49700.8	45010.4	39177.5	4298.62	18033.8	45744.4	53838.5	15866.4	11532.4	70394.3	74042.4	76277.5	14938.7	11283.6	37368.3	44837	19445.6	11518.3	4187.83	11513.1	11565.6	12756.5	5435.89	71302.8	C14550
MW0009456	p-Octopamine	对羟基苯乙醇胺	Alcohol and amines	醇、胺类	Polyamines	多胺	C8H11NO2	3	0.6906	104-14-3	FALSE	TRUE	TRUE	44779.7	36669.3	41511.4	77956.3	50505	34513.3	37474.5	48199	67081.6	39777.9	28985.5	33344.9	45825.6	53697.1	44277.6	32197.2	47790.9	73797.1	77646.3	65754.3	69733	72087.2	70465.4	45443.6	C04227
MW0005933	Acetaminophen	对乙酰氨基酚	Benzene and substituted derivatives	苯及其衍生物	Phenolics	苯酚类	C8H9NO2	1	0.6101	103-90-2	FALSE	TRUE	TRUE	35718.6	37174.4	40356.5	39355.7	32270.7	39913.8	31811.9	29028.5	35675.2	30149.5	29330.7	28040.6	41349.9	47996.9	34268.2	35320.3	38614.8	27459.9	40245	30769.7	37743.7	45422	41604.2	42079.8	C06804
MW0007143	Fenuron	芬农隆	Benzene and substituted derivatives	苯及其衍生物	Benzene and substituted derivatives	苯及其衍生物	C9H12N2O	2	0.7471	101-42-8	FALSE	FALSE	TRUE	98700.5	92142.1	97128.1	112657	100514	97617	95340	87519.4	124770	94797.7	106798	92646.3	124663	124862	93662.9	96996.6	109775	89696.5	113844	103396	116441	117782	123756	112842	-
MW0168405	L-Isoleucine	L-别异亮氨酸	Amino acid and Its metabolites	氨基酸及其代谢物	Amino acids	氨基酸	C6H13NO2	1	0.9898	-	TRUE	TRUE	TRUE	249944	248407	260995	268904	247533	266836	610960	528568	630695	575504	634166	591335	170576	177740	172022	164102	195604	211713	389964	288698	371307	341067	336496	362717	C00407
MEDN0391	3-Deoxy-D-Lyxo-Heptopyran-2-ularic Acid	二十二碳六烯酸	FA	脂肪酰类	Oxidized lipids	氧化脂质	C7H10O8	1	0.9678	-	TRUE	TRUE	TRUE	111626	95998.9	143431	171071	146352	103948	1.04359e+06	932383	861023	480599	445972	451675	101636	91268.6	84551.5	61523.5	90046.1	115142	181770	164883	187092	122318	108727	128336	C21044
MW0054593	LPE(0:0/22:6)	LPE(0:0/22:6)	GP	甘油磷脂类	LPE	溶血磷脂酰乙醇胺	C27H44NO7P	1	0.9639	-	TRUE	FALSE	TRUE	3.31712e+06	3.33101e+06	3.53437e+06	4.70542e+06	3.8991e+06	3.67601e+06	1.80677e+06	2.65155e+06	4.00289e+06	2.48007e+06	2.84567e+06	2.01935e+06	2.36935e+06	2.78118e+06	2.32541e+06	2.33025e+06	2.91446e+06	2.71252e+06	3.02994e+06	2.08415e+06	2.68045e+06	2.04939e+06	1.94296e+06	1.89646e+06	-
MEDN1267	LPE(0:0/22:5)	LPE(0:0/22:5)	GP	甘油磷脂类	LPE	溶血磷脂酰乙醇胺	C27H46NO7P	1	0.9108	-	TRUE	TRUE	TRUE	740277	773936	922232	1.17514e+06	1.00442e+06	859125	666053	1.14707e+06	1.31972e+06	1.07061e+06	903345	862173	311532	529684	531970	512519	782643	625524	545624	625116	705579	818575	699681	645612	-
MW0143813	D-Quinovose	6-脱氧-D-葡萄糖; D-喹诺酮糖; D-Chinovose; D-葡糖甘露糖;异鼠李糖; D-表藻糖;异戊糖	Carbohydrates and Its metabolites	碳水化合物及其代谢物	Carbohydrates and Its metabolites	碳水化合物及其代谢物	C6H12O5	1	0.8434	-	FALSE	TRUE	TRUE	74976.4	72703.9	76645.8	89927.5	95047.9	93211.7	78078.1	79231.4	72536.3	65542.3	79688.2	60692.6	93293.1	93511	70075	65807.1	95322.8	100315	100469	90066	87038.1	105631	88564.1	91797.6	C02522
MEDN0832	D-Glucosamine 6-Phosphate	D-葡萄糖胺6-磷酸	Carbohydrates and Its metabolites	碳水化合物及其代谢物	Phosphate sugars	磷酸糖	C6H14NO8P	1	0.78	-	FALSE	TRUE	TRUE	729.327	242.553	358.704	903.082	945.825	819.96	4844.87	2924.93	3397.49	7180.51	3302.87	6158.32	1074.68	728.192	649.178	1039.05	333.651	367.599	407.398	591.276	75.524	571.481	266.072	1868.54	-
MEDTN01418	2-Hydroxyoctadecanoic acid	DL-2-羟基硬脂酸	FA	脂肪酰类	FFA	游离脂肪酸	C18H36O3	1	0.6839	-	FALSE	TRUE	TRUE	252602	225041	274103	393626	344463	215533	410256	502.351	250.232	76.329	335.406	404.562	360349	345721	283497	260400	329510	416226	235.38	501915	576474	570126	579100	573072	-
MW0126396	Quinoline-4-carboxylic acid	4-喹啉羧酸	Organic acid and Its derivatives	有机酸及其衍生物	Organic acid and Its derivatives	有机酸及其衍生物	C10H7NO2	1	0.6174	-	FALSE	TRUE	TRUE	98347.5	101102	104650	120821	120337	111235	108336	110822	128866	117424	109081	104793	112695	122941	88262.3	94319.5	100329	85031.2	107226	96874.2	95959.9	107233	105744	102956	C06414
MEDN1254	LPI(18:1/0:0)	LPI(18:1/0:0)	GP	甘油磷脂类	PI	磷脂酰肌醇	C27H51O12P	1	0.6036	-	FALSE	TRUE	TRUE	23403.2	24196.4	20928.2	34838.8	25963.6	26966.2	111851	141050	177655	211766	149986	123366	28428	29167.2	23262.9	14600	33038.8	29028.4	38891.6	35102.6	26066	24464.6	21554.7	21901.9	-
MW0007548	Manidipine	马尼地平	Benzene and substituted derivatives	苯及其衍生物	Benzene and substituted derivatives	苯及其衍生物	C35H38N4O6	1	0.595	-	TRUE	FALSE	TRUE	164717	175413	179217	266730	143422	160051	61326.8	112897	127275	73769.9	80685	69978.8	74748.6	106159	73962.4	68497.6	126451	114347	75210.1	79015.7	103961	77285.5	48148.1	67439.3	-
MW0012846	[2-hydroxy-3-[(9Z,12Z)-octadeca-9,12-dienoyl]oxypropyl] 2-(trimethylazaniumyl)ethyl phosphate	[2-hydroxy-3-[(9Z,12Z)-octadeca-9,12-dienoyl]oxypropyl] 2-(trimethylazaniumyl)ethyl phosphate	GP	甘油磷脂类	PC	磷脂酰胆碱	C26H50NO7P	2	0.9482	-	TRUE	TRUE	TRUE	55789.3	49276.4	60103.2	61761.8	63155.8	59477	338933	414791	371285	338070	284286	281844	25713.1	28281.3	31316.8	24018.3	30578.6	47048.1	48811.7	46555.3	39830	41971.7	40715.4	38527.6	-
MW0154299	N-Arachidonoyl-3-hydroxy-Aminobutyric Acid	-	Amino acid and Its metabolites	氨基酸及其代谢物	Amino acid derivatives	氨基酸衍生物	C24H39NO4	2	0.91	-	FALSE	TRUE	TRUE	571.942	1827.24	2251.86	1715.12	425.817	1482.98	32983.6	34979.8	38763.3	37080.1	32276.2	29952.9	689.76	780.461	1268.69	1399.39	977.414	2042.25	1756.5	2237.02	1235.4	1287.57	1289.8	1071.42	-
MW0151682	Ile-Nap-OH	-	Amino acid and Its metabolites	氨基酸及其代谢物	Small Peptide	小肽	C24H24N2O6	2	0.9017	-	TRUE	TRUE	TRUE	108928	99785	110685	140077	123109	105881	112956	106263	124572	103077	109527	102032	84901.8	119297	78768.4	74418.7	78752.2	87235.1	87766.3	88378.2	93288.1	87199.1	102669	103014	-
MW0108727	N-cis-octadec-9Z-enoyl-L-Homoserine lactone	N-cis-octadec-9Z-烯酰基-L-高丝氨酸内酯	Aldehyde,Ketones,Esters	醛、酮、酯类	Esters	酯类	C22H39NO3	2	0.8967	-	FALSE	TRUE	TRUE	1.58429e+06	1.57449e+06	1.54103e+06	1.76244e+06	1.57068e+06	1.63735e+06	1429.28	1933.88	1.90685e+06	1661.12	1055.48	1052.23	1.66185e+06	1.89327e+06	1.39884e+06	1.43025e+06	1.41697e+06	1.32294e+06	2.29631e+06	2.06153e+06	2.31476e+06	2.2862e+06	2.2983e+06	2.32699e+06	-
MW0152618	Leu-Nap-OH	-	Amino acid and Its metabolites	氨基酸及其代谢物	Small Peptide	小肽	C24H24N2O6	2	0.8873	-	TRUE	TRUE	TRUE	100040	86762.5	94557.4	116560	100412	106733	96991.8	98018.8	117978	120298	97967.5	89314.2	79245	103388	73303.1	70237.1	78613.1	78514.5	81375.5	91577.1	79665.9	84947.8	89492.6	90982.8	-
MW0153024	Lys-Leu-Ala-Glu	-	Amino acid and Its metabolites	氨基酸及其代谢物	Small Peptide	小肽	C20H37N5O7	2	0.8827	-	TRUE	FALSE	TRUE	349.652	141.138	145.098	439.105	225.977	16.062	3583.13	7939.51	5264.74	6523.02	5403.21	7911.39	9691.79	8987.01	9162.03	8830.45	8360.24	8156.88	7245.26	6297.31	5448.06	4236.55	76.197	5200.04	-
MW0159024	Val-His-Ile-Glu	-	Amino acid and Its metabolites	氨基酸及其代谢物	Small Peptide	小肽	C22H36N6O7	2	0.882	-	FALSE	FALSE	TRUE	1.975	0.885	1.016	0.8	1.964	4.952	0.74	1.135	0.369	0.951	4.736	1.315	3.377	4.389	5.806	3.711	1.55	3.239	0.602	1.787	5.36	3.084	2.951	1.676	-
MW0155501	Phe-TyrMe-OH	-	Amino acid and Its metabolites	氨基酸及其代谢物	Small Peptide	小肽	C24H22N2O7	2	0.8766	-	TRUE	TRUE	TRUE	47977.4	44649.1	54142.1	57343.8	47348.5	45474.5	50889.2	47912.1	55924.9	50672.6	48202.4	44913.7	34724.1	50205.8	32321.7	33490.8	34611.2	36755.7	35264.4	36029.9	36035.9	35874.9	41662.5	47349.2	-
MW0153929	Misoprostol(free acid)-d5	-	Hormones and hormone related compounds	激素及激素相关物质	Hormones and hormone related compounds	激素及激素相关物质	C21H31D5O5	2	0.8678	-	TRUE	TRUE	TRUE	13895	14681.8	16251.4	16967	14351.8	15915	124956	138148	145934	152184	126080	128981	140.662	9092.22	10877.8	7096.65	23.952	9.86	19.862	25.76	41.106	26294.6	24381.6	32933.6	-
MW0155334	Phe-Ser-Lys-Glu	-	Amino acid and Its metabolites	氨基酸及其代谢物	Small Peptide	小肽	C23H35N5O8	2	0.843	-	FALSE	TRUE	TRUE	3.528	5.859	2.852	5.066	3.912	5.867	48.426	58.44	57.873	57.345	53.097	42.405	1.787	5.108	4.344	3.339	5.857	0.247	3.909	3.433	2.149	3.058	1.69	4.922	-
MW0150910	His-Gln-Val-Lys	组氨酸-谷酰胺-缬氨酸-赖氨酸	Amino acid and Its metabolites	氨基酸及其代谢物	Small Peptide	小肽	C22H38N8O6	2	0.8166	-	TRUE	TRUE	TRUE	56977.2	50591.6	43800.9	64949.9	40455.3	49913.7	72104.4	79002.2	69797.8	75031.8	53269.6	56635.3	24692.2	7687.43	22193.9	25162.3	20587.7	33680	23805.8	23105.4	21749.1	18720.9	16447.6	10825.6	-
MW0114022	Buprenorphine Glucuronide	丁丙诺啡葡萄糖醛酸苷	Heterocyclic compounds	杂环化合物	Heterocyclic compounds	杂环化合物	C35H49NO10	2	0.8021	-	FALSE	TRUE	TRUE	2.933	14.36	11.317	6.917	9.366	2.779	31.877	39.192	38.926	59.889	24.43	43.042	3.071	3.937	7.81	6.657	12.252	9.795	7.929	11.64	8.088	9.055	5.564	11.177	-
MW0158736	U-46619 Glycine methyl ester	-	Aldehyde,Ketones,Esters	醛、酮、酯类	Esters	酯类	C24H39NO5	2	0.7943	-	FALSE	TRUE	TRUE	1327.37	1406.67	1244.8	1650.14	755.059	954.492	9059.67	9003.23	8363.84	8249.73	7751.07	8493.49	20.789	73.956	8.402	5.23	63.678	2207.34	2184.07	2532.71	6.545	43.658	15.883	44.981	-
MW0158510	Tyr-Ile-Val-Glu	酪氨酸-异亮氨酸-缬氨酸-谷氨酸	Amino acid and Its metabolites	氨基酸及其代谢物	Small Peptide	小肽	C25H38N4O8	2	0.7504	-	FALSE	TRUE	TRUE	22123.6	19589	27908.7	36112.6	32516.8	26858.1	44887.4	63154.3	44488.6	38154.5	31338.2	28747	28282.2	26583.7	20715.2	19134.2	32035.8	43252.3	26605	22587.5	22113.5	16358.6	21720.3	15002	-
MW0011914	1,2-Dipalmitoleoyl-sn-glycero-3-phosphoethanolamine	1,2-二棕榈油酰基-sn-甘油-3-磷酸乙醇胺	GP	甘油磷脂类	PE	磷脂酰乙醇胺	C37H70NO8P	2	0.7469	-	TRUE	FALSE	TRUE	368902	339034	438784	255253	183811	304072	26156.9	84217.6	72492.2	151695	158315	115544	75067.8	2563.49	144530	178669	180348	257991	260027	11487.5	99546	24947.7	28559.5	31058.5	-
MW0146362	Aspartylmethionine	Asp Met	Amino acid and Its metabolites	氨基酸及其代谢物	Small Peptide	小肽	C9H16N2O5S	2	0.7447	-	TRUE	FALSE	TRUE	58417.2	60740.5	58341.3	75997.4	65817.4	66222	59356.1	60961.3	71156.9	61895.4	61126.9	52690.5	60544.2	66510.4	49363.7	49677.7	53568.6	46015.3	58881	55193.5	56995.5	58330.9	56512.2	57321.3	-
MW0139075	N-(4-methyl-2-oxochromen-7-yl)icosa-5,8,11,14-tetraenamide	N-(4-methyl-2-oxochromen-7-yl)icosa-5,8,11,14-tetraenamide	Alcohol and amines	醇、胺类	Amines	胺类	C30H39NO3	2	0.7418	-	TRUE	TRUE	TRUE	22083.5	20349	22943.5	33130.5	24557.4	23882.9	128443	208357	189662	147915	138500	138733	5922.62	8506.55	9927.03	6978.33	7071.43	52.039	22090.7	20319.4	19118.4	17.672	16871.3	22241.9	-
MW0168457	1-Hexadecyl-sn-glycerol 3-phosphate	1-十六烷基-sn-甘油3-磷酸	GP	甘油磷脂类	LPA	溶血磷脂酸	C19H41O6P	2	0.7295	-	FALSE	TRUE	TRUE	608873	515571	627858	746174	683420	627481	973150	1.37501e+06	1.17228e+06	863140	751959	718506	599384	627334	508483	508737	834071	946223	632220	707983	529339	480001	480306	363684	-
MW0006069	antimycin A1	抗霉素A1	Benzene and substituted derivatives	苯及其衍生物	Benzene and substituted derivatives	苯及其衍生物	C28H40N2O9	2	0.721	-	FALSE	TRUE	TRUE	960.137	1015.44	1244.45	2151.93	1867.24	796.303	9211.56	17520.8	9075.87	8868.62	6034.48	5224.32	256.342	1314.6	738.094	424.584	1784.16	1234.99	2861.41	5258.55	1007.87	1938.64	3728.01	2368.39	C11339
MW0151313	Ile-Ala-Leu-Arg	-	Amino acid and Its metabolites	氨基酸及其代谢物	Small Peptide	小肽	C21H41N7O5	2	0.72	-	FALSE	TRUE	TRUE	1634.42	1811.36	2313.02	2714.35	2337.6	1445.19	30245.4	36452.9	36212.2	35947.5	30855.2	31116.7	997.139	47.737	1616.6	1600.73	1780.55	3707.23	3341.08	2932.67	2280.14	1574.32	1360.65	2423.58	-
MW0062166	Pregnenolone sulfate	孕烯醇酮硫酸盐	Hormones and hormone related compounds	激素及激素相关物质	Hormones and hormone related compounds	激素及激素相关物质	C21H32O5S	2	0.7175	-	TRUE	FALSE	TRUE	5877.34	4723.01	5708.38	5013.17	3649.32	3804.07	5433.22	5780.1	4090.49	2438.84	1016.93	1865.4	927.725	477.868	1135.32	424.825	491.386	893.194	561.627	3552.72	8235.13	3089.78	4475.77	3639.22	C18044
MW0006390	Bisphenol AF	双酚AF	Benzene and substituted derivatives	苯及其衍生物	Benzene and substituted derivatives	苯及其衍生物	C15H10F6O2	2	0.7146	-	FALSE	TRUE	TRUE	30059.5	24630.1	36254.6	36013.3	34500.5	35986.9	28653.1	28505.9	32365.8	28966.3	28165.8	28916.5	35083.4	35924.3	34175.4	33932.5	33059	25622.4	42424.5	32919	33338.8	32940.7	38276.5	36993	C14350
MW0003681	Vinclozolin M2	长春唑啉 M2	Benzene and substituted derivatives	苯及其衍生物	Benzene and substituted derivatives	苯及其衍生物	C11H11Cl2NO2	2	0.7127	-	FALSE	TRUE	TRUE	54454.1	53199.9	53853.2	61371.8	53533.3	53923.8	53948.9	50017.9	65904.2	55496.1	54525.8	49841.5	55580.7	61408.7	50228.7	47388.5	54894.5	46483.1	44763.4	47080.8	46828.5	46524.8	47022.1	48865.2	C14207
MW0157865	Thr-Val-Leu-Thr-Ser	-	Amino acid and Its metabolites	氨基酸及其代谢物	Small Peptide	小肽	C22H41N5O9	2	0.71	-	FALSE	TRUE	TRUE	17587.4	15806.3	19576.7	22019.5	20983.5	16322.9	32626.9	48006.8	41406.7	33326	28326.9	24340.6	16683.4	17334.3	13833.5	13573	22317.7	27590.3	15178.9	17102	18019	14271	16690.4	13568.4	-
MW0169109	Emodic acid	大黄酸	Organic acid and Its derivatives	有机酸及其衍生物	Organic acid and Its derivatives	有机酸及其衍生物	C15H8O7	2	0.7046	-	FALSE	FALSE	TRUE	22030.6	16118	13371.9	14971.6	24414.8	17573.2	10692.9	19173.4	19584	6949.19	13972.2	6166.46	10621.9	21891.3	6183.78	7138.92	13869.1	20413.9	10498.2	5348.15	8820.03	4989.21	10910	4357.43	-
MW0149761	Gln-Lys-Phe-Arg	谷酰氨-赖氨酸-苯丙氨酸-精氨酸	Amino acid and Its metabolites	氨基酸及其代谢物	Small Peptide	小肽	C26H43N9O6	2	0.6947	-	TRUE	TRUE	TRUE	7323.74	4989.53	5674.65	5655.27	5644.45	5908.71	26129.5	36404.5	55580.2	33388.5	45426.9	23080.7	3022.32	4590.91	2699.52	2655.95	3351.59	5494.56	4817.38	9318.47	1259.76	1874.73	2854.67	1816.19	-
MW0123471	9H-Pyrrolo[1',2':2,3]isoindolo[4,5,6-cd]indol-9-one, 10-acetyl-2,6,6a,7,11a,11b-hexahydro-11-hydroxy-7,7-dimethyl-, (6aR,11aS,11bR)-	α-环苯磺酸	Organic acid and Its derivatives	有机酸及其衍生物	Organic acid and Its derivatives	有机酸及其衍生物	C20H20N2O3	2	0.6816	-	FALSE	FALSE	TRUE	10056.1	8695.64	10756.4	12509.2	11387.7	10986.8	15201	10237.4	11962.9	12247	10239.9	10625.7	16285.2	17873.3	11990.8	10916.4	12688.3	9721.43	13518.1	10028.8	18681.7	14489	17050.9	19077.1	-
MW0057932	PC(P-18:0/20:4(5Z,8Z,11Z,14Z))	1-(1Z-十八碳烯基)-2-(5Z，8Z，11Z，14Z-二十碳四烯酰基)-sn-甘油-3-磷酸胆碱	GP	甘油磷脂类	PC-P	磷脂酰胆碱	C46H84NO7P	2	0.6805	-	TRUE	TRUE	TRUE	12823.6	11976	16851.2	11477.8	17136.6	16681.1	49128.8	44798.5	41293.9	40466	37723.9	31203.1	3839.75	2920.51	5255.99	4502.27	3685.71	4253.99	7169.51	9818.85	14991.8	40.362	8024.5	11915.5	-
MW0144693	Ala-Phe-Ile-Arg	-	Amino acid and Its metabolites	氨基酸及其代谢物	Small Peptide	小肽	C24H39N7O5	2	0.6683	-	FALSE	TRUE	TRUE	534.404	468.462	240.481	544.954	401.675	410.116	32910.8	49663.6	80688	33733.7	31652.3	30421.7	1078.42	720.434	774.408	2003.59	514.551	462.078	1656.38	3871.33	921.785	1348.92	1698.21	1124.29	-
MW0004629	4-amino-6,7-dihydro-5H-cyclopenta[b]pyridin-2-yl 4-methylbenzenesulfonate	4-氨基-6,7-二氢-5H-环戊[b]吡啶-2-基4-甲基苯磺酸盐	Benzene and substituted derivatives	苯及其衍生物	Benzene and substituted derivatives	苯及其衍生物	C15H16N2O3S	2	0.6622	-	FALSE	FALSE	TRUE	42268.8	37986.6	41189	43870.1	74295.3	43877.6	74123.5	74368.9	50441.5	46200.2	45167.1	70255.7	42400.4	48821.1	35695.9	35546.5	42727.5	33630.5	44882.9	40620.5	46220.6	46190.3	45317.7	48798.2	-
MW0156476	S1P Lyase Fluorogenic Substrate	-	Benzene and substituted derivatives	苯及其衍生物	Benzene and substituted derivatives	苯及其衍生物	C14H18NO8P	2	0.6616	-	TRUE	TRUE	TRUE	1519.95	1201.86	1253.63	1203.53	1433.41	1264.71	3456.12	3001.47	2677.78	2033.09	2435.89	2645.94	577.429	866.387	355.468	735.587	600.617	1285.24	2166.72	1584.13	1636.31	573.247	2927.41	1530.6	-
MW0144244	Acetoxy-10-gingerol	-	Benzene and substituted derivatives	苯及其衍生物	Benzene and substituted derivatives	苯及其衍生物	C23H36O5	2	0.6484	-	TRUE	TRUE	TRUE	1824.11	332.472	2226.47	2078.65	719.718	1684.29	17044.3	18770.9	21506.9	19471.9	17709.7	17980.2	121.063	203.112	96.55	121.018	54.844	14.802	31.161	136.624	110.172	59.16	13.681	14.899	-
MW0012973	1-Palmitoyl-2-oleoyl-sn-glycero-3-phosphate	1-棕榈酰基-2-油酰基-sn-甘油-3-磷酸	GP	甘油磷脂类	PA	磷脂酸	C37H71O8P	2	0.6392	-	TRUE	TRUE	TRUE	18362.6	26781.7	20604.9	30813.1	18126.8	23645.1	37425.3	27526.8	35458.2	32261.2	28774.9	29016.2	14362.7	12667.1	7259.12	15043.2	9929.18	12831.9	16808.3	11958.2	20406.3	20971.2	18295.8	25821.3	C00416	1.76436
MW0112155	4,7-dichloro-3-hydroxy-3-[2-(4-methoxyphenyl)-2-oxoethyl]-1H-indol-2-one	4,7-二氯-3-羟基-3-[2-(4-甲氧基苯基)-2-氧乙基]-1H-吲哚-2-酮	Aldehyde,Ketones,Esters	醛、酮、酯类	Ketones	酮类	C17H13Cl2NO4	2	0.6122	-	FALSE	FALSE	TRUE	15453.2	26990.4	28126.3	15147.7	22989.4	16268.3	15425.7	1224.17	18451.1	6939.75	31714.7	39204.9	46567.5	48128.9	55252.3	49656.4	38106.4	4123.57	18115.9	17108	26314.2	72487.8	22470.5	81567.6	-
MW0059085	1-hexadecyl-2-(9Z-octadecenoyl)-sn-glycero-3-phosphoethanolamine	1-十六烷基-2-(9Z-十八烯酰基)-sn-甘油-3-磷酸乙醇胺	GP	甘油磷脂类	PE-P	磷脂酰乙醇胺	C39H78NO7P	2	0.5923	-	FALSE	FALSE	TRUE	73867.8	58743.4	100035	112519	89112.1	157707	59871.6	263794	141770	82412.8	96072.7	159433	98267.2	106562	80570.4	71624	11242.3	73047.9	91194	66634.7	81637.7	61011	34387.2	42912.3	-
MW0054485	1-Palmitoylglycerol 3-phosphate	LPA(16:0/0:0)	GP	甘油磷脂类	LPA	溶血磷脂酸	C19H39O7P	2	0.5569	-	TRUE	TRUE	TRUE	32506.3	29744	32903.3	33437.9	32064.7	31555.4	132421	138197	151958	152060	137828	131097	29.093	10833.7	9658.17	6848.36	12251.1	12860.6	19.678	25.906	14.418	44.995	11368.3	12.928	C04036
MW0152934	Lys-Gln-Asp-Lys	-	Amino acid and Its metabolites	氨基酸及其代谢物	Small Peptide	小肽	C21H39N7O8	2	0.5288	-	TRUE	TRUE	TRUE	574054	630945	653422	853572	652790	757010	1.11768e+06	982815	1.09664e+06	1.13587e+06	925160	739510	626566	611370	226524	313577	567530	473518	729437	625506	516137	303175	717572	1.07609e+06	-
MW0013000	1-Stearoyl-2-linoleoyl-sn-glycero-3-phosphate	1-硬脂酰基-2-亚油酰基-sn-甘油-3-磷酸	GP	甘油磷脂类	PA	磷脂酸	C39H73O8P	2	0.5078	-	FALSE	TRUE	TRUE	931581	623100	583598	743202	845144	1.10771e+06	1.32152e+06	1.4224e+06	1.70719e+06	1.64373e+06	2.5476e+06	2.0304e+06	977993	552414	484824	509959	368390	489449	674927	605531	667575	1.03718e+06	766993	1.13639e+06	C00416
MW0014926	N-(6-Aminohexanoyl)-6-aminohexanoate	N-(6-氨基己酰基)-6-氨基己酸酯	Benzene and substituted derivatives	苯及其衍生物	Benzene and substituted derivatives	苯及其衍生物	C12H24N2O3	3	0.9627	-	FALSE	TRUE	TRUE	83.527	133.016	64.195	73.616	181.118	55.357	544.333	718.005	3359.68	2954.1	2368.12	1820.97	41.571	69.21	66.639	49.168	55.762	124.564	86.362	379.966	70.43	490.489	186.952	844.348	-
MW0011579	(R)-10-hydroxystearic acid	（R)-10-羟基硬脂酸酯	FA	脂肪酰类	Oxidized lipids	氧化脂质	C18H36O3	3	0.9625	-	FALSE	TRUE	TRUE	814.815	920.164	1092.43	1857.06	1103.26	892.491	18221.2	24102.8	23499.8	19730.6	19589.8	18157.5	1289.76	1675.6	2764.97	848.896	386.809	1796.82	624.924	1896.77	658.053	1177.71	390.46	816.022	C03195
MW0162398	5a,11a-Dehydrotetracycline	5a，11a-脱氢四环素; 12-脱氢四环素	Aldehyde,Ketones,Esters	醛、酮、酯类	Esters	酯类	C22H22N2O8	3	0.9355	-	FALSE	TRUE	TRUE	14091.2	10408.5	15874.3	14624.4	12454	12154	13895.9	12172.6	18750.4	18088.1	12838	13926.1	11038.5	12980.6	10437.3	10231.2	11945.6	10330.6	9588.65	8574.76	11216.1	10326.9	9913.95	12553.9	-
MW0140348	(3E)-3-[(1R,5R,6S)-5-hydroxy-7-oxabicyclo[4.1.0]heptan-2-ylidene]pyruvic acid	(3E)-3-[(1R,5R,6S)-5-hydroxy-7-oxabicyclo[4.1.0]heptan-2-ylidene]丙酮酸	Aldehyde,Ketones,Esters	醛、酮、酯类	Esters	酯类	C9H10O5	3	0.8411	-	TRUE	TRUE	TRUE	26582.5	19747.4	24128.8	30906.4	26795.6	25829.7	26840.2	30512.7	34251.1	28199.5	27770.9	23722.5	140317	126312	92615.8	83620.9	94971.5	23918.5	125350	26502.9	117632	115759	134272	109750	C21086
MW0107684	(R)-cysteate	磺基丙氨酸	Organic acid and Its derivatives	有机酸及其衍生物	Organic acid and Its derivatives	有机酸及其衍生物	C3H7NO5S	3	0.8341	-	TRUE	FALSE	TRUE	7020.91	9004.06	11504.5	7224.08	12492	12213.6	7195.67	7529.2	4358.34	12734.8	7241.99	7451.35	4119.78	1489.67	2467.42	2424.29	543.418	1245.95	6135.7	2606.12	9387.27	3697.14	7609.66	5346.45	C00506
MW0147427	Chlorophyllide b	叶绿素b	Tryptamines,Cholines,Pigments	色胺、胆碱、色素	Pigments	色素	C35H32MgN4O6	3	0.8263	-	FALSE	FALSE	TRUE	53097.6	80987.9	44674.7	67402.1	72000.2	85172.4	33068.4	42524.6	80300.3	73203.7	51465.1	33542.1	18127.1	56362.6	37101.7	56289.3	69698.5	48361.7	44594.8	19323.5	39931.8	39103.3	37744.6	39701.7	-
MW0161475	Benzoyl-beta-D-glucoside	苯甲酰-β-D-葡萄糖苷	Benzene and substituted derivatives	苯及其衍生物	Benzene and substituted derivatives	苯及其衍生物	C13H16O7	3	0.8218	-	TRUE	TRUE	TRUE	40818.5	42100.2	45919.6	45114.8	39806.8	41136.7	31510.1	32296.8	38330.1	32279.6	31407.7	30239.4	15392.5	16615	13929	14941.7	13871	17558.3	7501.48	7033.33	2386.62	7516.75	7068.78	9452.26	-
MW0161139	(2S)-6-[5-[(3aS,4S,6aR)-2-oxo-1,3,3a,4,6,6a-hexahydrothieno[3,4-d]imidazol-4-yl]pentanoylamino]-2-azaniumylhexanoate	(2S)-6-[5-[(3aS,4S,6aR)-2-oxo-1,3,3a,4,6,6a-hexahydrothieno[3,4-d]imidazol-4-yl]pentanoylamino] -2-氮杂环己酸酯	Others	其他	Others	其他	C16H28N4O4S	3	0.7938	-	TRUE	FALSE	TRUE	20.377	17.283	26.494	26.254	19.017	34.924	53.332	15.208	10.098	16.769	32.547	19.439	17.072	18.294	9.591	11.883	8.712	2.568	12.807	17.245	10.908	16.946	9.737	17.242	-
MW0112958	4-(beta-D-glucosyloxy)benzoic acid	对羟基苯甲酸-葡萄糖	Organic acid and Its derivatives	有机酸及其衍生物	Organic acid and Its derivatives	有机酸及其衍生物	C13H16O8	3	0.7788	-	FALSE	FALSE	TRUE	63409.6	58344.4	69975.8	80092.5	83388.1	72574.4	56858.1	67011.4	102132	85794.4	68814.9	58241.5	43202.7	76044.7	45975.5	43422.6	51301.7	91071.7	55881	75579.5	55175.9	51836.4	67096.3	60129	C03993
MW0142373	2-Hydroxy-5-(methylsulfanyl)-3-oxopent-1-enyl phosphate	2-Hydroxy-5-(methylsulfanyl)-3-oxopent-1-enyl phosphate	Aldehyde,Ketones,Esters	醛、酮、酯类	Esters	酯类	C6H11O6PS	3	0.7359	-	FALSE	TRUE	TRUE	8339.79	7716.02	6928.53	8350.91	7721.31	7881.98	13945.7	13947.6	12089.9	10524.3	13406.4	13435.3	4378.15	5087.56	6387.33	6627.38	6092.44	8897.08	10269.2	14474.1	7198.97	8612.82	6886.82	7348.06	-
MW0142902	3-deoxy-8-O-phosphono-D-manno-oct-2-ulosonic acid	2-脱氢-3-脱氧-D-辛酸-8-磷酸盐	Organic acid and Its derivatives	有机酸及其衍生物	Organic acid and Its derivatives	有机酸及其衍生物	C8H15O11P	3	0.72	-	TRUE	FALSE	TRUE	1410.23	999.605	1170.92	1365.53	609.918	1598.67	570.171	1069.73	439.283	1492.9	763.693	1222.28	897.984	851.185	966.714	560.923	806.784	741.573	407.897	418.834	282.673	1379.32	117.629	376.629	C04478
MW0130114	2-(3,4-Dihydroxybenzoyloxy)-4,6-dihydroxybenzoic acid	2-(3,4-二羟基苯甲酰氧基)-4,6-二羟基苯甲酸酯	Benzene and substituted derivatives	苯及其衍生物	Benzene and substituted derivatives	苯及其衍生物	C14H10O8	3	0.6993	-	FALSE	TRUE	TRUE	4293.2	4161.96	4616.72	6923.36	5144.19	4239.65	5264.82	5239.09	6065.99	6230.52	5251.28	5315.61	6281.69	7436.57	3803.1	5253.92	5950.93	4555.65	7120.41	6060.97	6223.56	6813.74	7186.73	6176.88	C04524
MW0156503	Salicin 6-phosphate	水杨苷6-磷酸	Organic acid and Its derivatives	有机酸及其衍生物	Organic acid and Its derivatives	有机酸及其衍生物	C13H19O10P	3	0.6921	-	TRUE	TRUE	TRUE	7602.77	5965.53	9297.67	7589.81	6280.7	6689.27	9752.46	12230.8	7137.09	11352.8	9652.56	9670.52	951.651	1242.66	780.599	891.993	757.197	1537.04	301.924	642.874	840.489	683.871	714.077	292.848	C06188
MW0143834	2-Methyl-6-geranylgeranyl-1,4-benzoquinol	6-香叶基香叶基-2-甲基苯-1，4-二醇	Benzene and substituted derivatives	苯及其衍生物	Benzene and substituted derivatives	苯及其衍生物	C27H40O2	3	0.6759	-	TRUE	TRUE	TRUE	3177.37	2123.64	4465.03	3545.8	3446.31	3352.4	835.433	784.074	1332.63	2063.75	443.211	755.2	4906.9	6487.27	5834.25	5572.59	5762.33	8665.51	3653.93	5517.42	4004.35	3790.19	3953.04	3641.33	C20737
MW0149292	Fructoselysine 6-phosphate	6-磷酸果糖赖氨酸	Organic acid and Its derivatives	有机酸及其衍生物	Organic acid and Its derivatives	有机酸及其衍生物	C12H25N2O10P	3	0.6471	-	TRUE	TRUE	TRUE	13557.7	12365.2	12090.3	15119.1	16333.7	11939.9	13559.1	14143.8	16120.3	15125.1	14989.1	12909.9	8636.43	10226	8424.68	8095.84	11131.9	11107.5	13481.1	12681	12023.6	13142.5	13310.3	13586.3	-
MW0140648	(S)-2-Hydroxypropylphosphonic acid	(S)-2-羟基丙基磷酸酯	Organic acid and Its derivatives	有机酸及其衍生物	Organic acid and Its derivatives	有机酸及其衍生物	C3H9O4P	3	0.6093	-	TRUE	TRUE	TRUE	853.171	1060.12	902.481	1446.16	5863.59	1665.87	869.197	2479.67	2183.69	462.352	1437.91	737.592	14662.4	11180.1	7878.04	8710.26	10611.3	1036.66	11312	4177.47	12117.8	14880.2	11939.7	12118.2	C06452
MW0157447	Tetranactin	四联素	Heterocyclic compounds	杂环化合物	Heterocyclic compounds	杂环化合物	C44H72O12	3	0.8921	-	TRUE	TRUE	TRUE	6121.59	1682.61	1034.64	38360.3	2799.51	6625.91	49074	27523.6	41454.6	26668.7	22913.9	18463.1	146827	138665	141414	62501.8	24410.8	22213.1	34662.7	137004	81911.4	74325.8	47377.2	107509	C06764
MW0015742	alpha-Tocotrienoxyl radical	α-生育三烯氧基自由基	Aldehyde,Ketones,Esters	醛、酮、酯类	Ketones	酮类	C29H43O2	3	0.8708	-	FALSE	TRUE	TRUE	2317.69	3183.28	3512.29	5373.56	2633.05	4248.39	3220.76	2123.19	4256.34	79.941	1024.45	244.993	3883.78	3931.33	3992.01	2920.73	4397.41	2893.33	4599.97	3187.14	4729.73	6507.49	6900.61	5240.54	-
MW0158813	Undecylprodigiosin	十一烷基紫红甙	Amino acid and Its metabolites	氨基酸及其代谢物	polypeptide	多肽	C25H35N3O	3	0.8156	-	TRUE	TRUE	TRUE	866.917	806.519	617.957	1144.4	774.189	213.084	10297.8	11364.9	11279.2	12166.4	10577.3	9844.52	567.441	328.817	19.587	150.197	161.003	12.055	886.159	1200.96	343.326	454.628	703.784	529.805	-
MW0129947	2-[[3,4-Dihydroxy-5-(3,4,5-trihydroxybenzoyl)oxybenzoyl]amino]acetic acid	2-({[3，4-二羟基-5-(3，4，5-三羟基苯甲酰氧基）苯基]（羟基）亚甲基}氨基）乙酸	Organic acid and Its derivatives	有机酸及其衍生物	Organic acid and Its derivatives	有机酸及其衍生物	C16H13NO10	3	0.7783	-	TRUE	FALSE	TRUE	2562.76	1700.91	653.49	2069.3	3173.77	2235.04	3301.65	3098.6	4211.15	3471.42	3014.63	3039.48	5588.74	5500.08	4309.73	3571.1	3012.18	1395.39	6864.94	1557.69	4573.64	5108.94	7699.49	6488.5	-
MW0013061	2-(Methoxycarbonyl)-5-methyl-2,4-bis(3-methyl-2-butenyl)-6-(2-methyl-1-oxopropyl)-5-(4-methyl-3-pentenyl)cyclohexanone	2-(甲氧羰基)-5-甲基-2,4-双(3-甲基-2-丁烯基)-6-(2-甲基-1-氧丙基)-5-(4-甲基-3-戊烯基)环己酮	Aldehyde,Ketones,Esters	醛、酮、酯类	Ketones	酮类	C29H46O4	3	0.7495	-	TRUE	TRUE	TRUE	2716.11	3376.91	4742.79	4592.38	3779.83	2211.05	31531.3	47945.4	28403.4	34653.8	26199	31979	1377.81	1012.11	918.441	1351.43	1056	1482.3	3397.91	4619.36	4464.82	4895.67	5878.72	27.687	-
MW0010840	(17alpha,23S)-17,23-Epoxy-29-hydroxy-27-norlanosta-1,8-diene-3,15,24-trione	(17alpha,23S)-17,23-Epoxy-29-hydroxy-27-norlanosta-1,8-diene-3,15,24-trione	Aldehyde,Ketones,Esters	醛、酮、酯类	Ketones	酮类	C29H40O5	3	0.7271	-	FALSE	TRUE	TRUE	21.467	423.483	31.033	34.7	486.614	24.708	12290.6	12975.2	14734.1	13839.1	12843.5	13113.9	155.274	222.852	268.978	258.108	236.444	341.019	518.659	566.221	528.676	558.849	2.159	20.159	-
MW0104457	2-{[hydroxy(2,4,5-trihydroxyphenyl)methylidene]amino}acetic acid	2-{[羟基（2，4，5-三羟基苯基）亚甲基]氨基}乙酸	Organic acid and Its derivatives	有机酸及其衍生物	Organic acid and Its derivatives	有机酸及其衍生物	C9H9NO6	3	0.7085	-	FALSE	FALSE	TRUE	224800	218611	227574	250546	291155	272785	178353	264984	339268	275439	243255	197739	147504	300401	181624	162672	209467	247275	232282	240060	168228	169230	196836	192855	-
MW0136949	7-Chloro-3,3',4',5,6,8-hexamethoxyflavone	7-Chloro-3,3',4',5,6,8-六甲氧基黄酮	Flavonoids	黄酮	Flavonoid	黄酮	C21H21ClO8	3	0.7005	-	FALSE	TRUE	TRUE	80023.1	89889.6	84195.1	96757.8	96946.9	85389.4	89945.8	100572	93870.6	76208	77776.8	70900.1	90628.2	113712	78989.3	74493.2	60719.1	50287.1	70268.1	60752.5	60084.7	35918.4	50911.8	73552.9	-
MW0056444	[(2R)-1-octanoyloxy-3-phosphonooxypropan-2-yl] tridecanoate	PA(8:0/13:0)	GP	甘油磷脂类	PA	磷脂酸	C24H47O8P	3	0.6936	-	FALSE	TRUE	TRUE	132.997	12.676	1774.83	16.965	118.332	1157.5	1361.21	1241.14	951.448	309.897	902.052	830.845	223.047	137.622	568.631	638.139	430.956	397.797	8052.3	7946.11	7117.78	9436.19	7252.1	8803.07	-
MW0149286	(2S,3S)-2-(dimethylamino)-N-[(2Z,6S,9S,10S)-6-isobutyl-10-isopropyl-5,8-dioxo-11-oxa-4,7-diazabicyclo[10.2.2]hexadeca-1(14),2,12,15-tetraen-9-yl]-3-methyl-pentanamide	(2S,3S)-2-(二甲氨基)-N-[(2Z,6S,9S,10S)-6-isobutyl-10-isopropyl-5,8-dioxo-11-oxa-4,7-diazabicyclo[10.2 .2]hexadeca-1(14),2,12,15-tetraen-9-yl]-3-methyl-pentanamide	Benzene and substituted derivatives	苯及其衍生物	Benzene and substituted derivatives	苯及其衍生物	C28H44N4O4	3	0.6884	-	FALSE	FALSE	TRUE	104602	85805.8	76731.6	90575.2	113152	79755.3	96460.4	75529.7	118278	103666	88994.4	118473	96007.2	151138	114722	138370	84965.2	101276	142796	110061	144862	100625	114889	110613	-
MW0140371	(3R,2'S)-Myxol 2'-(2,4-di-O-methyl-alpha-L-fucoside)	(3R,2'S)-Myxol 2'-(2,4-二-O-甲基-α-L-岩藻糖苷)	Aldehyde,Ketones,Esters	醛、酮、酯类	Aldehydes	醛类	C48H70O7	3	0.6626	-	TRUE	TRUE	TRUE	71087.4	62726.4	54340.9	39733	36584.9	49731.1	78258.1	60526.1	68304	75945.9	65391.1	85908.6	23940.8	5413.47	6650.28	20762.7	19968.2	48783.1	37667.9	26715.2	37469.8	61577.7	37439.1	88200.6	-
MW0055514	Oxepahyperforin	奥西帕海福林	Terpenoids	萜类	Ditepenoids	二萜	C35H52O5	3	0.6537	-	TRUE	TRUE	TRUE	2797.32	930.646	860.645	1147.63	2122.5	1299.55	9491.9	13993	17497.7	11900.6	7804.39	9979.82	2855.86	4330.4	2204.91	2171.05	5093.28	4121.12	30587.7	39152.4	28616.4	28192.5	28054.6	30413	-
MW0129423	{8-[2-(acetyloxy)propan-2-yl]-2-oxo-2H,8H,9H-furo[2,3-h]chromen-9-yl}oxidanesulfonic acid	{8-[2-(乙酰氧基）丙-2-基]-2-氧代-2H，8H，9H-呋喃并[2，3-h]苯并吡喃-9-基}氧烷磺酸	Organic acid and Its derivatives	有机酸及其衍生物	Organic acid and Its derivatives	有机酸及其衍生物	C16H16O9S	3	0.651	-	FALSE	TRUE	TRUE	285684	322133	340460	341360	293228	246946	387684	375562	573001	479644	365701	300559	248758	297303	300234	300361	514533	622836	784140	662519	431545	452652	639601	579164	-
MW0124717	L-Stercobilinogen	L-粪胆碱原	Heterocyclic compounds	杂环化合物	Heterocyclic compounds	杂环化合物	C33H48N4O6	3	0.6332	-	FALSE	TRUE	TRUE	128.709	63.326	253.441	87.854	157.979	159.442	70.885	415.069	537.548	127.697	122.046	317.227	100.689	163.059	229.832	72.148	46.693	159.613	1238.08	1016.04	1048.34	576.564	1047.87	990.621	C05789
MW0145000	2,2':5',2''-Terthiophene	α-三噻吩基；三噻吩	Heterocyclic compounds	杂环化合物	Heterocyclic compounds	杂环化合物	C12H8S3	3	0.6193	-	TRUE	TRUE	TRUE	10622.2	19058.1	20796.4	21095	20415.6	20024.1	19803.3	19128.8	24912.8	19259.4	18464.3	17706.2	43905.3	44312.9	29799.6	30885.5	31612	14847.7	34131.7	11132.4	34796.7	36412.3	34770.6	36219.2	C08460
MW0159783	Selenophosphoric acid	硒磷酸	Others	其他	Metal, Non-metal and related compounds	金属、非金属及相关物质	H3PO3Se	3	0.6171	-	FALSE	TRUE	TRUE	3218.53	3743.35	4119.49	3114.66	2022.87	2656.14	6569.86	4255.77	3824.44	4313.17	2153.41	2307.27	11198.7	6549.98	5414.09	6269.03	2426.24	3034.86	7309.87	3582.29	11045	10447.4	10600.3	10611.2	C05172
MW0062921	PS(22:1(13Z)/20:5(5Z,8Z,11Z,14Z,17Z))	PS(22:1(13Z)/20:5(5Z,8Z,11Z,14Z,17Z))	GP	甘油磷脂类	PS	磷脂酰丝氨酸	C48H82NO10P	3	0.6105	-	TRUE	FALSE	TRUE	79128.7	71144.3	56178.8	48431.7	43421.3	32752.3	29095.6	19677.4	37538.2	28066.4	32764	45262.8	67859.8	73428.7	91629	116842	109407	88459.1	21122	30844.3	47595.8	41957.2	54367.1	49894.9	-
MW0054518	LysoPA(i-21:0/0:0)	LysoPA(i-21:0/0:0)	GP	甘油磷脂类	LPA	溶血磷脂酸	C24H49O7P	3	0.6	-	TRUE	FALSE	TRUE	143634	133573	147374	139734	127892	129611	348050	384411	400515	419360	365016	375232	95783.3	109246	102951	89279.2	129054	133360	85561.3	114208	91794.3	78734.1	106622	22.246	-
MW0138209	Gallagic acid	-	Organic acid and Its derivatives	有机酸及其衍生物	Organic acid and Its derivatives	有机酸及其衍生物	C28H12O16	3	0.5957	-	TRUE	TRUE	TRUE	2187.29	3623.39	2922.32	4526.43	3232.45	3369	1351.55	765.712	818.086	1276.11	1054.57	898.372	4372.11	5156.98	7559.18	5226.11	3750.75	6571.49	8899.72	5199.2	6904.34	10496.8	11568.5	6456.48	-
MW0134125	5,7-Dihydroxy-2-phenyl-8-[3,4,5-trihydroxy-6-(hydroxymethyl)oxan-2-yl]-6-(3,4,5-trihydroxyoxan-2-yl)chromen-4-one	5，7-二羟基-2-苯基-8-[3，4，5-三羟基-6-(羟甲基）恶烷-2-基]-6-(3，4，5-三羟基恶烷-2-基)-4H-苯并吡喃-4-酮	Aldehyde,Ketones,Esters	醛、酮、酯类	Ketones	酮类	C26H28O13	3	0.5902	-	FALSE	TRUE	TRUE	17006.1	14828.3	18246.9	18893.6	17856	16346.6	15060.5	17134.4	18847.8	15521.9	17497.6	15538.2	14974.5	19264.3	13475.9	14956.2	15902.4	10004.6	11519.6	9484.54	11471.1	12385.8	14281.6	13226	-
MW0116097	(S)-Spirobrassinin	(S)-螺油菜素	Heterocyclic compounds	杂环化合物	Indole and Its derivatives	吲哚及其衍生物	C11H10N2OS2	3	0.5878	-	FALSE	FALSE	TRUE	2562.99	1052.63	1945.78	3161.1	3651.2	1095.79	2187.53	2345.19	4819.59	3606.13	1819	704.788	3742.63	5397.14	3357.55	2694.57	3154.73	1093.9	3921.23	3076.55	4494.25	3359.05	3869.45	3153.72	-
MW0057015	1-(9Z-octadecenoyl)-2-pentadecanoyl-glycero-3-phosphocholine	PC(18:1(9Z)/15:0)	GP	甘油磷脂类	PC	磷脂酰胆碱	C41H80NO8P	3	0.5683	-	TRUE	FALSE	TRUE	13066.8	61931.7	53727.9	58559.8	74190.3	30161	13917.9	9199.9	42083.6	153446	42571.2	38088.3	74197.6	93530.7	95884	89234.5	101851	82617	100861	77561.2	109371	66159.6	36816.4	40461.9	-
MW0056988	PC(18:1(11Z)/18:2(9Z,12Z))	PC(18:1(11Z)/18:2(9Z,12Z))	GP	甘油磷脂类	PC	磷脂酰胆碱	C44H82NO8P	3	0.5572	-	TRUE	TRUE	TRUE	83476.6	278178	126015	322186	198642	114105	118844	153940	304979	227953	137946	171511	521094	392332	450612	419412	358979	516099	246220	239988	325729	280715	290517	222559	-
MW0057412	Phosphatidylcholine(20:5/15:0)	PC(20:5(5Z,8Z,11Z,14Z,17Z)/15:0)	GP	甘油磷脂类	PC	磷脂酰胆碱	C43H76NO8P	3	0.5509	-	TRUE	FALSE	TRUE	963598	1.01353e+06	1.65319e+06	1.43101e+06	990617	1.44147e+06	1.21747e+06	1.041e+06	947946	920096	845541	1.14931e+06	817450	948829	430490	279563	497687	758430	1.39699e+06	1.09794e+06	1.13866e+06	1.10685e+06	473222	1.09873e+06	-
MW0056916	1-(9Z-hexadecenoyl)-2-pentadecanoyl-glycero-3-phosphocholine	PC(16:1(9Z)/15:0)	GP	甘油磷脂类	PC	磷脂酰胆碱	C39H76NO8P	3	0.5461	-	TRUE	TRUE	TRUE	156094	209435	182462	196364	132099	217089	126054	166465	176746	123990	33891.6	83723.3	576524	672961	398094	407206	358443	322406	282106	231125	252187	234580	208757	273264	-
MW0056949	1-Octadecanoyl-2-pentadecanoyl-glycero-3-phosphocholine	PC(18:0/15:0)	GP	甘油磷脂类	PC	磷脂酰胆碱	C41H82NO8P	3	0.5434	-	TRUE	FALSE	TRUE	54568.1	99798.5	81534.2	71161.7	79387.5	36890.9	43399	37280.1	51641.9	41735.3	48534.6	58135.7	194722	161682	173471	195047	117388	222038	60342	89785.1	65781.8	92369.4	59513.3	31247.4	-
MW0057115	PC(18:3(9Z,12Z,15Z)/15:0)	PC(18:3(9Z,12Z,15Z)/15:0)	GP	甘油磷脂类	PC	磷脂酰胆碱	C41H76NO8P	3	0.5421	-	TRUE	FALSE	TRUE	7702.38	17125.1	8564.75	9966.18	9219.04	21358.3	2326	17331.4	26748.4	19374.1	14205.1	26988.4	58376.7	51179	38495	37647	32172	20329.5	26349.7	19731.6	20539.9	15371.2	15621.5	17787.1	-
MW0135751	6-{[2-(2,4-dihydroxyphenyl)-7-methoxy-6-(3-methylbut-1-en-1-yl)-3-(3-methylbut-2-en-1-yl)-4-oxo-4H-chromen-5-yl]oxy}-3,4,5-trihydroxyoxane-2-carboxylic acid	6-{4-[5，7-二羟基-6-(3-甲基丁-1-烯-1-基)-3-(3-甲基丁-2-烯-1-基)-4-氧代-4H-苯并吡喃-2-基]-3-羟基苯氧基}-3，4，5-三羟基氧烷-2-羧酸	Benzene and substituted derivatives	苯及其衍生物	Benzene and substituted derivatives	苯及其衍生物	C32H36O12	3	0.5364	-	TRUE	TRUE	TRUE	37795.5	33563.6	36474.8	43323	38014.2	40254	35533.4	37042.3	42370.7	37799.5	40991.5	34992.7	23931.5	36127.7	23568.2	25161.4	27240	25487.6	29562.4	35076.1	29691.4	28037.4	26693.5	27807	-
MW0147408	Chlorbenside	氯苯甙	Others	其他	Others	其他	C13H10Cl2S	3	0.5324	-	FALSE	TRUE	TRUE	34410.9	29378.5	30264.1	31713.1	36940.6	33787.1	26515.1	28578	34261.9	25176.7	24174.5	27080.5	33393.3	35025.1	25230.9	29633.1	37601.9	29580	4072.64	13464.5	7108.69	19680.3	17408.6	702.565	C14584
MW0056966	PC(18:0/20:5(5Z,8Z,11Z,14Z,17Z))	PC（18：0/20：5（5Z，8Z，11Z，14Z，17Z））	GP	甘油磷脂类	PC	磷脂酰胆碱	C46H82NO8P	3	0.5183	-	FALSE	TRUE	TRUE	5582.54	11229.4	15334.1	20435.5	18433.5	17975.3	54812.9	91256	116544	93044.5	72228.8	71027.2	33608	42789.5	24402	8847.41	5037.73	14955	30356.1	22201.7	25437	21981.7	11380.9	26768.3	-
MW0154248	N-Acetyl-L-phosphinothricin	N-乙酰-L-膦丝菌素	Organic acid and Its derivatives	有机酸及其衍生物	Organic acid and Its derivatives	有机酸及其衍生物	C7H14NO5P	3	0.5181	-	FALSE	FALSE	TRUE	108947	99805.4	115449	127568	123894	131425	84718.4	128833	193654	143608	117518	99790.6	64498	147820	92201.3	77671.1	96813.8	126667	110945	124499	81872.7	91001.1	94324.1	103737	C17952
MEDN1854	9,10-Dihydroxystearic acid	9,10-二羟基硬脂酸	FA	脂肪酰类	FFA	游离脂肪酸	C18H36O4	3	0.5177	-	TRUE	TRUE	TRUE	3578.15	2562.8	3246.12	2784.77	2825.88	3009.79	31305.5	36552.7	35303.7	36994	31612.6	30610.7	16.254	572.18	1013.72	1176.44	1170.52	2712.1	1961.07	2144.44	1381.76	1062.74	7.965	15.18	C19622
