# Supplementary material for: Mechanism research on inhibition of gastric cancer in vitro by the extract of Pinellia ternata based on network pharmacology and cellular metabolomics
Source: Open Med (Wars). 2025 Feb 18;20(1):20241131. doi: 10.1515/med-2024-1131 (PMC11843166; doi:10.1515/med-2024-1131)
Supplement: Supplementary Table 6 [file med-2024-1131-s6.xlsx]

## Sheet: Sheet1
Index	Compounds	物质	Class I	物质一级分类	Class II	物质二级分类	Formula	Level	score	CAS	Control-H_vs_PTE-H	Control-B_vs_PTE-B	Control_vs_PTE	PTE-H1	PTE-H2	PTE-H3	PTE-H4	PTE-H5	PTE-H6	PTE-B1	PTE-B2	PTE-B3	PTE-B4	PTE-B5	PTE-B6	Ctrl-H1	Ctrl-H2	Ctrl-H3	Ctrl-H4	Ctrl-H5	Ctrl-H6	Ctrl-B1	Ctrl-B2	Ctrl-B3	Ctrl-B4	Ctrl-B5	Ctrl-B6	cpd_ID	Fold_Change
MW0111241	Palmitoleoyl Ethanolamide	棕榈油酰乙醇酰胺	FA	脂肪酰类	Others	其他	C18H35NO2	2	0.6783	94421-67-7	TRUE	TRUE	TRUE	1824.21	738.755	810.24	1190.19	1863.16	1620.09	4213.92	4877.99	15390.5	2264.63	6571.38	4037.39	42.215	66.468	107.145	65.802	99.228	170.964	122.058	57.58	103.959	58.602	44.709	68.064	-
MW0063564	C24:1 Sphingomyelin	N-神经酰基-D-赤型鞘氨醇磷酸胆碱	SL	鞘脂类	SM	鞘磷脂	C47H93N2O6P	2	0.9193	94359-13-4	TRUE	TRUE	TRUE	49976.1	55225.4	58266.6	51445.4	48633.5	48514.1	57275.7	50429.4	50912.3	46830.5	30505.1	20111	76600.3	69524.8	54875.9	82245.9	70119.8	48330.6	61750.2	68413.3	56913.7	61834.1	57510.9	79121.3	C00550	0.721666
MW0110701	20-HETE ethanolamide	20-HETE乙醇酰胺	Alcohol and amines	醇、胺类	Amines	胺类	C22H37NO3	2	0.7439	942069-11-6	TRUE	TRUE	TRUE	1300.31	1225.66	936.682	598.339	976.192	788.132	1527.44	4351.52	4371.51	4437.53	2929.56	2035.18	5.692	115.591	139.848	111.571	6.306	157.43	187.581	174.502	89.221	253.044	114.935	75.83	-
MW0009449	Phthalic acid	邻苯二甲酸	Organic acid and Its derivatives	有机酸及其衍生物	Organic acid and Its derivatives	有机酸及其衍生物	C8H6O4	2	0.9725	88-99-3	TRUE	TRUE	TRUE	113642	127709	217819	294093	124972	224518	135697	263080	330017	160744	277387	224385	83234.9	92381.4	85066.1	73246.8	73959.1	102634	94743.6	44624.1	66730.5	136572	92497.1	77884.2	C01606
MW0054320	Leukotriene B4 dimethylamide	白三烯 B4 二甲基酰胺	FA	脂肪酰类	Oxidized lipids	氧化脂质	C22H37NO3	2	0.9266	83024-92-4	TRUE	TRUE	TRUE	6108.66	5397.44	5999.36	6329.81	5177.53	5631.86	43329.7	49885.6	47473.3	49417.2	45423.4	48392.8	174.3	531.567	1369.65	58.144	1266.18	494.065	3.037	35902.8	10.631	22.848	32713.9	35163.1	-
MW0124314	Himbacine	欣巴辛	Heterocyclic compounds	杂环化合物	Heterocyclic compounds	杂环化合物	C22H35NO2	2	0.9028	6879-74-9	TRUE	TRUE	TRUE	3478.33	3180.3	3019.52	3270.12	2839.97	2903.31	13685.4	16316.2	16791.2	17531.3	11472.6	13416.9	42.514	16.25	8.457	18.466	1.556	14.78	44.435	80.771	444.376	8.635	27.354	13.658	-
MW0111078	Linoleoyl ethanolamide	亚油酰基乙醇酰胺	Alcohol and amines	醇、胺类	Amines	胺类	C20H37NO2	2	0.9033	68171-52-8	TRUE	TRUE	TRUE	2908.61	2836.25	2711.66	2187.63	1537.39	4457.88	21155.6	21694.4	25170.1	25340.3	22230.6	22938.9	341.516	398.804	583.009	853.059	610.529	1055.7	5749.67	9313.58	1554.38	4365.1	7992.56	4794.61	-
MEDP0125	Choline	胆碱	Tryptamines,Cholines,Pigments	色胺、胆碱、色素	Cholines	胆碱类	C5H14NO+	1	0.9494	62-49-7	TRUE	TRUE	TRUE	136231	125566	114628	152283	90046.6	103676	175459	167062	149092	136772	145441	146739	74798.4	76979.7	68315.2	70677.5	64255.5	53070.6	110708	88404.8	123256	128129	126783	128922	C00114	1.47447
MW0053857	Chimyl alcohol	1-O-十六烷基-sn-甘油；1-O-十六烷基甘油；桂皮醇；甘油十六烷基醚	GL	甘油脂类	MG	单甘油酯	C19H40O3	2	0.5122	6145-69-3 | 53584-29-5	TRUE	TRUE	TRUE	198.215	64.91	42.106	252.522	158.415	251.016	6565.61	6813.7	7202.13	8161.9	6143.26	6910.99	13.32	88.706	97.677	6.703	72.739	52.885	631.361	453.618	564.345	3.21	3.998	3.056	-
MW0125165	Methylthiouracil	甲基硫氧嘧啶	Heterocyclic compounds	杂环化合物	Heterocyclic compounds	杂环化合物	C5H6N2OS	2	0.6489	56-04-2 | 1123-10-0 | 91795-77-6	TRUE	TRUE	TRUE	8379.53	8032.84	7888.49	8853.42	9880.99	8993.55	9230.73	6427.69	12532	11003.7	11011.2	9700.68	9465.72	9901.26	12687	10881.1	12204.5	15453.4	18925.3	15881.8	18237	16606.3	17719.8	17256.8	C19265
MW0169257	N-(2-Hydroxyethyl)heptadecanamide	N-(2-羟乙基)十七酰胺	Organic acid and Its derivatives	有机酸及其衍生物	Organic acid and Its derivatives	有机酸及其衍生物	C19H39NO2	2	0.8621	53832-59-0	TRUE	TRUE	TRUE	7905.21	7489.4	5542.86	7557.42	12984.5	6385.15	85897.1	43474.3	99526.7	55374.4	43980.3	53829.9	652.508	1308.05	1799.79	906.221	3044.96	2774.08	2674.06	9754.5	587.997	999.887	1495.45	1887.64	-
MW0148859	Echinocystic acid	棘囊酸	Organic acid and Its derivatives	有机酸及其衍生物	Organic acid and Its derivatives	有机酸及其衍生物	C30H48O4	2	0.8687	510-30-5	TRUE	TRUE	TRUE	104.958	117.937	117.343	85.275	96.743	85.22	760.559	820.06	849.515	685.319	687.992	861.818	7.702	4.503	7.635	4.16	6.314	5.444	6.939	1.168	5.778	4.987	7.613	7.271	C08942
MW0006085	Aspirin	乙酰水杨酸	Organic acid and Its derivatives	有机酸及其衍生物	Organic acid and Its derivatives	有机酸及其衍生物	C9H8O4	2	0.7273	50-78-2	TRUE	TRUE	TRUE	2221.16	2602.98	2503.84	2645.56	3284.62	2592.05	2941.93	3599.16	5359.35	3383.27	4265.97	2971.1	3105.59	2425.12	3979.32	4181.2	4080.12	5756.99	8048.86	5725.97	6372.99	9639.05	7277.51	6730.09	C01405
MW0055423	Virodhamine hydrochloride	盐酸维罗达明	FA	脂肪酰类	Others	其他	C22H38ClNO2	2	0.9325	443129-35-9	TRUE	TRUE	TRUE	85.579	181.378	136724	143.728	86.202	141.294	12666.5	13358.2	12306	15060.5	88081.7	15489.6	149227	240207	144157	125938	155463	141381	191300	158672	207454	222602	226377	186497	-
MW0112276	2-Propanoylthiazole	2-丙酰基噻唑	Heterocyclic compounds	杂环化合物	Heterocyclic compounds	杂环化合物	C6H7NOS	2	0.7121	43039-98-1	TRUE	TRUE	TRUE	2515.28	2450.4	2355.26	2505.57	2842.38	2866.01	2816.22	2546.68	4024.04	3345.43	3334.76	3054.12	2933.96	2876.41	4008.94	3253.85	3756.49	4240.42	5498.26	4324.56	4561.1	5506.77	5100.81	4748.6	-
MW0110342	Val-Glu	谷氨酸	Amino acid and Its metabolites	氨基酸及其代谢物	Small Peptide	小肽	C10H18N2O5	3	0.7891	424-59-9	TRUE	TRUE	TRUE	1490.14	1252.1	1306.5	1546.63	1361.92	1404.84	5085.53	4300.25	3195.92	3794.38	3361.89	3948.53	168.942	80.513	273.609	190.632	164.952	320.417	1342.77	918.032	1230.98	1417.68	1287.72	1160.54	-
MW0011179	(3beta,22E)-26,27-Dinorergosta-5,22-dien-3-ol	-	Alcohol and amines	醇、胺类	Alcohols	醇类	C26H42O	3	0.7831	38788-81-7	TRUE	TRUE	TRUE	2741.25	2652.52	2724.8	2442.15	2495.78	2705.38	23710.3	25009	24916.5	24308.8	24765.8	27172.1	285.029	331.797	488.735	716.523	682.643	668.252	4809.53	7793.44	4617.87	2739.4	6691.28	6025.88	-
MW0103432	8-Hydroxyguanosine	8-羟基鸟苷	Nucleotide and Its metabolites	核苷酸及其代谢物	Nucleotide and Its metabolites	核苷酸及其代谢物	C10H13N5O6	2	0.6905	3868-31-3	TRUE	TRUE	TRUE	28453.8	27121	26389	26061.9	22882.5	22718.1	12710.9	13294.4	11740	14292.2	12612.5	11647.8	26899.5	29508.2	29727.7	29371.7	27614.1	32573.6	25277.9	19981.4	27304	24957.3	29065.9	28934.3	-
MEDP0618	Carnitine-2-methyl-C4	2-甲基丁酰肉碱	FA	脂肪酰类	CAR	酰基肉碱	C12H23NO4	1	0.92	31023-25-3	TRUE	TRUE	TRUE	2155.75	1871.62	1978.56	1958.82	1917.01	2024.52	94.484	11079.7	145.912	97.481	120.838	30.794	2934.59	3521.57	3332.01	3439.05	2989.51	4356.1	36703.8	27807.8	32795.6	32889	35213	35015.9	-
mws0120	Choline Alfoscerate	sn-甘油-3-磷酸胆碱	GP	甘油磷脂类	PC	磷脂酰胆碱	C8H20NO6P	1	0.9531	28319-77-9	TRUE	TRUE	TRUE	51071.7	75467.4	83348.4	54730.3	105253	100307	116652	114730	58292.9	181118	142251	158770	62009.1	60494	50599.5	56369.4	21062.1	11824.8	76888.7	14558.9	88639.2	75126.5	79665.9	88050	C00670	1.81236
MW0144074	8-iso Prostaglandin F1a-d9	-	Hormones and hormone related compounds	激素及激素相关物质	Hormones and hormone related compounds	激素及激素相关物质	C20H27D9O5	2	0.6854	26771-96-0	TRUE	TRUE	TRUE	71052.6	62897	33041.9	62151.9	63408.9	58279.2	90003.3	102264	170480	116111	116058	134441	621275	685704	555872	555215	579721	539864	633639	595337	596377	581820	540341	581791	-
MW0125279	N-(14-Methylhexadecanoyl)pyrrolidine	N-(14-甲基十六烷基)吡咯烷	Alcohol and amines	醇、胺类	Amines	胺类	C21H41NO	3	0.8002	260058-83-1	TRUE	TRUE	TRUE	12402	10913.2	14233.4	11620.9	11651.7	13499.6	85915.3	76989.7	81315.7	91324.3	76160.6	91826.4	1367.17	2070.32	1580.66	1414.51	3331.54	5251.04	1903.71	6298.34	2959.71	1738.6	1621.59	2845.34	-
MEDP0401	5'-Deoxy-5'-(Methylthio) Adenosine	5-脱氧-5-甲硫腺苷	Nucleotide and Its metabolites	核苷酸及其代谢物	Nucleotide and Its metabolites	核苷酸及其代谢物	C11H15N5O3S	1	0.9574	2457-80-9	TRUE	TRUE	TRUE	33316.6	39761.9	42833.5	44559.5	53106	37966	40481.2	37759.6	54478.1	46735.3	53090.8	47446.3	15951.8	20127.9	24799.9	20320.3	28198.4	41009	26374.3	20107.5	18294.1	20288.1	22758.4	19277.9	C00170
MW0145220	Arachidonic Acid methyl ester-d8	花生四烯酸甲酯-d8	FA	脂肪酰类	Others	其他	C21H34O2	2	0.8763	19245-55-7	TRUE	TRUE	TRUE	15618	15373.8	15638.1	16219.3	14448.3	13639.2	105736	107174	109534	110913	102823	107699	5451.79	10272.1	12358.2	11385.4	14024.1	8176.36	8182.48	11639.2	1355.2	4793.73	1854.9	1808.82	-
MW0063393	S-1 Methanandamide	S-1甲酰胺	FA	脂肪酰类	Oxidized lipids	氧化脂质	C23H39NO2	2	0.9017	157182-50-8	TRUE	TRUE	TRUE	3063.09	2895.16	2695.14	2756.29	2826.85	2560.73	15696.7	16423.8	17579.7	19110.1	17580.7	22366.1	45.838	23.925	9.119	19.91	9.181	9.005	47.91	87.086	479.121	3.753	29.493	21.851	-
MW0111175	BQ-788	BQ-788	Amino acid and Its metabolites	氨基酸及其代谢物	Small Peptide	小肽	C34H50N5NaO7	2	0.8915	156161-89-6	TRUE	TRUE	TRUE	346.433	589.027	807.641	504.819	547.883	521.415	5008.3	6790.3	5733.56	5405.98	7335.91	6068.02	2747.83	2972.87	2666.28	3119.64	4257.23	3426.26	15510.4	17826	14974.9	15435.7	14503.8	15620.5	-
MW0111149	Dihomo-gamma-linolenoylethanolamide	8，11，14-二十碳三烯酰乙醇酰胺；N-(8Z，11Z，14Z-二十碳三烯酰基)-乙醇酰胺	Alcohol and amines	醇、胺类	Amines	胺类	C22H39NO2	2	0.9252	150314-34-4	TRUE	TRUE	TRUE	15272.5	13063.8	13651.4	15001	12272.5	11209.3	49480.7	53765	45569.1	49867.4	50052.9	51065.8	6036.21	2862.16	7432.51	7086.68	11430.4	11085.6	20026.7	29823	9840	15935.3	9044.26	16411.8	C13828
MW0168263	Phosphite	亚磷酸盐	Others	其他	Metal, Non-metal and related compounds	金属、非金属及相关物质	H3O3P	3	0.7938	14901-63-4	TRUE	TRUE	TRUE	53953.7	54316.8	54921.6	59694.2	63280	61392.8	63420.9	60984.6	87040.6	68601.2	74682.8	63258.5	66347.3	63767.9	83970.6	75027.3	85808.7	99223.4	119031	97418.1	105164	112213	112570	110065	-
MW0169792	N-[(2R)-1-Hydroxypropan-2-yl]hexadecanamide	N-[(2R)-1-Hydroxypropan-2-yl]hexadecanamide	FA	脂肪酰类	Others	其他	C19H39NO2	2	0.9143	142128-47-0	TRUE	TRUE	TRUE	21301.7	17337.4	37775.4	21877.7	18829.3	20261	213113	115886	225159	122528	117615	121888	8536.48	13475.5	14201.3	15475.3	19196.1	6812.19	12766.7	15956.1	4262.51	6449.76	2756.59	2437.23	-
MW0006009	Alprenolol	阿普洛尔	Benzene and substituted derivatives	苯及其衍生物	Phenolics	苯酚类	C15H23NO2	2	0.9373	13655-52-2	TRUE	TRUE	TRUE	24842.9	24708.7	25577.6	30110.7	28205.4	27755.8	18622.2	27804	26026.7	22051.1	26019.3	18878.4	37401.1	40367.4	32315.2	30110.7	33879.5	31232.6	41889.8	30499.7	33009.5	43499.5	35878.1	42247.4	-
MEDN0682	Octadecanamide	硬脂酰胺	Alcohol and amines	醇、胺类	Amines	胺类	C18H37NO	1	0.9097	124-26-5	TRUE	TRUE	TRUE	1635.61	1418.54	1554.63	1430.48	1379.64	1511.07	9103.6	9231.95	9454.66	9843.64	9797.82	8968.56	2.856	2.554	3.453	0.927	377.028	1.591	4.489	1.375	2.69	158.419	2.501	0.862	C13846
MW0111288	Sphingosine	鞘氨醇	SL	鞘脂类	SM	鞘磷脂	C18H37NO2	1	0.795	123-78-4	TRUE	TRUE	TRUE	537.811	500.737	502.665	537.555	513.176	494.651	2759.38	3156.72	2815.82	3022.63	2858.66	3004.71	0.527	0.054	0.25	0.281	1.19	0.48	0.278	0.559	0.57	0.582	0.564	0.343	C00319	3646.44
MW0008588	N,N-dimethylsphingosine	N，N-二甲基-4-烯氨酸	SL	鞘脂类	SPH	鞘氨醇	C20H41NO2	2	0.9464	122314-67-4	TRUE	TRUE	TRUE	57889.8	54288	63191.5	54351.1	52486.5	54582.4	151998	157901	163174	164140	165466	160320	7163.65	17993.6	21647.7	19943.6	24565.7	14322.4	14329.4	20381.2	2373.61	8397.11	3249.2	3168.47	C13914
MW0111232	n-Oleoylethanolamine	正油酰乙醇胺	Alcohol and amines	醇、胺类	Amines	胺类	C20H39NO2	2	0.9365	111-58-0	TRUE	TRUE	TRUE	12814.1	11484.8	10957.8	11253.8	9017.21	7932.67	67981.2	70753.7	71617.8	71960.2	68142	68897.2	135.922	471.956	797.504	182.63	924.9	620.992	18.301	32265.7	9.598	19.088	19.931	31531.5	-
MEDP1241	5-Hydroxy-2-oxo-4-ureido-2,5-dihydro-1H-imidazole-5-carboxylic acid ester	5-羟基-2-氧代-4-脲基-2,5-二氢-1H-咪唑-5-羧酸酯	Organic acid and Its derivatives	有机酸及其衍生物	Organic acid and Its derivatives	有机酸及其衍生物	C5H6N4O5	1	0.8905	-	TRUE	TRUE	TRUE	9805.79	8709.11	8805.66	9617.42	9580.86	9489.88	9614.92	8608.1	14272	11127.6	11284.5	9623.69	10992.6	10032.2	13692.5	11715.2	13410.7	15449.9	18578.5	16033.3	17256.7	19256.9	18815.5	18046	-
MEDP1166	Phosphatidylcholine	PC(16:0/2:0)	GP	甘油磷脂类	PC	磷脂酰胆碱	C26H52NO8P	1	0.6632	-	TRUE	TRUE	TRUE	24853.6	21943	27021.8	23112.2	31297.4	27503.6	138042	152742	188951	126743	127494	123942	4797.2	6199.44	9647.11	7549.43	15809.5	30083.3	13779.1	25246.1	7440.93	8822.31	10200.3	9972.61	C00157	6.77809
MEDP1434	Carnitine C4:DC	肉碱 C4:DC	FA	脂肪酰类	CAR	酰基肉碱	C11H19NO6	1	0.6298	-	TRUE	TRUE	TRUE	8623.11	8557.5	9661.81	8876.95	8877.83	8533	8244.6	10064.9	12201.3	8555.44	10227.8	8106.99	10986.8	10228.4	11923.6	10184.2	11947.7	11912.8	15496.3	12188	13313.2	16486.4	14439.4	14315.4	-
MW0108733	N-tetradecylcyclohexanecarboxamide	N-十四烷基环己烷甲酰胺	Alcohol and amines	醇、胺类	Amines	胺类	C21H41NO	2	0.922	-	TRUE	TRUE	TRUE	5527.48	5323.88	5527.69	5357.48	5718.26	4680.24	27818.5	31052	30653.1	3065.76	29176.5	2586.51	280.853	908.711	239.197	1834.68	188.206	405.273	3088.67	888.209	3456.11	1771.61	4043.81	3494.38	-
MW0011920	PE-NMe(16:0/16:0)	1,2-Dipalmitoyl-sn-glycero-3-phosphoethanolamine-N-methyl	GP	甘油磷脂类	PE	磷脂酰乙醇胺	C38H76NO8P	2	0.9141	-	TRUE	TRUE	TRUE	8953.47	15453.4	22086.3	23825.6	22589.3	18033.1	7634.8	7160.33	19123.2	16469.5	15358.6	14754.4	6146.01	11698.3	15565.4	3544.4	13143.9	11163.1	3329.36	5778.46	10194.4	1670.05	6022.11	7121.91	-
ZINC43617340	Pipericine	（2E，4E)-N-(2-甲基丙基）十八碳-2，4-二烯酰胺	FA	脂肪酰类	Others	其他	C22H41NO	2	0.8985	-	TRUE	TRUE	TRUE	5891	4519.89	4805.07	4513.06	5485.58	5703.11	24495.8	28834.7	25285.4	27635.5	23739.6	24073.1	3559.91	1266.11	759.797	731.825	1074.84	1002.85	10914.7	9700.9	9653.48	10273.1	10250.5	12439.7	-
MW0126399	Chinomethionat	甲硫磷	Others	其他	Medicine	药物	C10H6N2OS2	2	0.898	-	TRUE	TRUE	TRUE	6.473	348.621	419.045	611.286	354.334	298.296	381.629	460.252	586.178	166.601	225.178	345.283	5266.63	3299.64	2773.44	3038.81	1857.35	351.868	4220.79	314.306	3748.43	3986.13	4490.73	3955.67	-
MW0147818	-CP 47,497-d11	-	Heterocyclic compounds	杂环化合物	Heterocyclic compounds	杂环化合物	C21H23D11O2	2	0.8812	-	TRUE	TRUE	TRUE	24789.2	21473.3	23272.8	23561.2	22226.1	20215.5	90752.8	101285	96104.1	100734	83017.3	93683.3	10331	19073.5	19338.7	18580.5	20689.1	3940.14	27081.3	26262.2	15196.3	14179.1	2.821	20878.1	-
MW0108157	Met-His-Lys	甲硫氨酰-组氨酰-赖氨酸	Amino acid and Its metabolites	氨基酸及其代谢物	Small Peptide	小肽	C17H30N6O4S1	2	0.7702	-	TRUE	TRUE	TRUE	4401.75	4879.21	5923.31	5659.78	7608.93	7372.67	8343.83	9780.38	13092.4	8038.54	6699.85	7170.89	10177.2	8308.69	8583.97	7742.56	10943.5	5059.37	10715.8	10893.9	11025.5	11727.3	12043.1	12099.4	-
MW0006489	Carbaryl	卡巴利	Benzene and substituted derivatives	苯及其衍生物	Benzene and substituted derivatives	苯及其衍生物	C12H11NO2	2	0.731	-	TRUE	TRUE	TRUE	41150.6	37697.8	40344.8	43989.7	39052.1	39752.8	42888.4	44573.7	51808.1	40727.8	47824.9	42746.5	33516.4	41331.1	15371.5	29170.1	33035.6	34139.3	40716.5	43815.7	37545.1	37719.2	38502.2	40827.1	C07491
MW0002641	L-Phenylalaninol	L-苯丙氨醇	Benzene and substituted derivatives	苯及其衍生物	Benzene and substituted derivatives	苯及其衍生物	C9H13NO	2	0.7055	-	TRUE	TRUE	TRUE	157280	145051	152178	179711	150892	154480	164678	174170	199620	161845	184809	168352	121849	153440	121935	107013	126936	132356	156624	154322	145893	147484	152305	147215	-
MW0115000	L-Formylkynurenine	N’-甲酰基犬尿氨酸	Amino acid and Its metabolites	氨基酸及其代谢物	Amino acid derivatives	氨基酸衍生物	C11H12N2O4	3	0.9574	-	TRUE	TRUE	TRUE	707.661	603.257	631.93	728.419	593.318	632.716	2012.34	2111.29	2290.05	2069.39	2371.16	2266.19	474.355	151.001	393.907	480.774	555.572	324.431	1304.38	855.573	1160.28	1177.31	927.935	1051.58	C02700	1.92136
MW0166213	3-Hydroxy-5-methyl-o-methyltyrosine	3-羟基-5-甲基-邻-甲基酪氨酸	Others	其他	Others	其他	C11H15NO4	3	0.8581	-	TRUE	TRUE	TRUE	386.836	370.317	530.231	345.891	293.672	295.79	2699.59	2860.15	1.873	2233.7	2293.46	1832.95	4.256	8.65	3.147	3.414	9.525	13.936	9.486	5.985	5.695	1.388	6.631	7.511	-
MW0140526	(1E,2S)-2-methylbutanal oxime	(1E,2S)-2-甲基丁醛肟	Others	其他	Others	其他	C5H11NO	3	0.7082	-	TRUE	TRUE	TRUE	2858.93	2459.32	2733.87	2732.33	2419.66	2650.03	7322.57	7371.31	7199.95	7877.61	8215.86	7641.56	1666.06	1974.46	1354.39	1156.18	2187.07	2724.33	4705.22	4144.56	4514.24	3988.92	4322.45	4504.89	C19491
MW0107803	Leu-Ser	L-亮氨酸-L-丝氨酸	Amino acid and Its metabolites	氨基酸及其代谢物	Small Peptide	小肽	C9H18N2O4	3	0.6705	-	TRUE	TRUE	TRUE	411.558	305.904	370.033	330.476	286.292	336.81	4.997	4002.14	2339.72	2511.45	2220.73	1748.57	20.425	3.243	9.154	3.774	33.008	18.488	5.5	20.585	7.818	5.887	23.763	4.748	-
MW0060369	PE-NMe2(18:1(9Z)/18:3(9Z,12Z,15Z))	PE-NMe2(18:1(9Z)/18:3(9Z,12Z,15Z))	GP	甘油磷脂类	PE	磷脂酰乙醇胺	C43H78NO8P	3	0.6569	-	TRUE	TRUE	TRUE	663.073	394.131	252.089	141.472	203.845	267.108	99.971	331.514	353.595	429.307	225.823	163.344	2206.68	3704.1	1768.87	1705.69	2145.97	272.298	649.768	786.819	750.629	522.088	599.808	365.315	-
MW0113284	6-({2-[4,6-dihydroxy-2-methoxy-3-(3-methylbut-2-en-1-yl)phenyl]-2-hydroxyacetyl}oxy)-3,4,5-trihydroxyoxane-2-carboxylic acid	6-({2-[4，6-二羟基-2-甲氧基-3-(3-甲基丁-2-烯-1-基）苯基]-2-羟基乙酰基}氧基)-3，4，5-三羟基恶烷-2-羧酸	Organic acid and Its derivatives	有机酸及其衍生物	Organic acid and Its derivatives	有机酸及其衍生物	C20H26O12	3	0.5359	-	TRUE	TRUE	TRUE	11704	9281.64	10765.7	14813.1	10600.1	13161.7	11637.1	12567.8	12509.9	11476.7	13262.1	12388.4	7539.52	10948	8360.21	6598.85	7192.29	8343.3	10904.4	11569.4	11083.9	11327	10920.4	9440.38	-
MW0054526	LysoPC(18:3(6Z,9Z,12Z))	溶血PC(18:3(6Z,9Z,12Z))	GP	甘油磷脂类	PC	磷脂酰胆碱	C26H48NO7P	3	0.5105	-	TRUE	TRUE	TRUE	1888.43	1496.22	2434.09	1104.84	1754.35	2090.75	3430.34	6901.5	9569.88	3147.3	2695.23	3463.28	536.143	608.037	786.868	651.761	877.729	1125.38	408.922	563.409	154.166	435.453	412.661	359.808	C04230	5.77663
MW0103598	Inosine diphosphate	肌苷 5'-二磷酸	Nucleotide and Its metabolites	核苷酸及其代谢物	Nucleotide and Its metabolites	核苷酸及其代谢物	C10H14N4O11P2	2	0.6155	86-04-4	TRUE	TRUE	TRUE	619042	574872	576952	598893	490335	565004	300140	338270	327151	348589	314239	323434	415401	582458	411824	402750	357685	285876	195339	200457	313239	202305	174938	198057	C00104	1.43755
MW0055405	N-Palmitoyl Taurine	N-棕榈酰牛磺酸	FA	脂肪酰类	FFA	游离脂肪酸	C18H37NO4S	2	0.9388	83982-06-3	TRUE	TRUE	TRUE	2834.47	3267.73	3774.69	5821.77	4998.96	3231.46	13474.3	15686.4	15700.3	11223.4	9474.61	11917.6	2574.48	1176.35	867.737	881.734	2974.43	4101.47	1723.81	1686.12	1177.89	1135.51	1369.46	567.372	-
MW0015555	Acetylvalerenolic acid	乙酰戊烯醇酸	Terpenoids	萜类	Sesquiterpenoids	倍半萜	C17H24O4	2	0.8575	81397-67-3	TRUE	TRUE	TRUE	1249.48	934.94	1417.67	1606.71	1258.64	1157.39	8133.62	11218.5	10182.3	9452.86	7796.56	7223.44	222.263	283.776	11.603	14.464	289.445	451.138	10.248	608.606	302.602	7.853	4.805	6.093	-
MW0109041	Pantothenic acid	泛酸	CoEnzyme and vitamins	辅酶和维生素	CoEnzyme and vitamins	辅酶和维生素	C9H17NO5	1	0.9126	79-83-4	TRUE	TRUE	TRUE	319054	309650	357901	359247	318899	317621	326333	307886	339945	331014	327343	317606	118939	127570	125170	123231	122992	155818	184094	126909	155822	152447	151928	172698	C00864
MW0007512	L-Lactic acid	L-乳酸	Organic acid and Its derivatives	有机酸及其衍生物	Organic acid and Its derivatives	有机酸及其衍生物	C3H6O3	1	0.9888	79-33-4	TRUE	TRUE	TRUE	170101	184179	173101	171576	107968	128846	315327	256385	262617	273852	277776	263764	326031	292238	281551	361518	351814	282081	517821	325598	428865	443686	500292	504411	C00186
MW0154985	Penitrem F	培尼替林 F	Heterocyclic compounds	杂环化合物	Heterocyclic compounds	杂环化合物	C37H44ClNO5	3	0.6441	78213-65-7	TRUE	TRUE	TRUE	2946.08	3308.59	3077.14	4693.15	4605.6	3234.41	35311.2	36480.9	38311.3	31916.4	33270	28669	365.187	522.983	2101.37	1965.21	1742.86	2638.5	2714.28	3050.78	2710.44	2501.47	2749.77	2516.77	C20598
MW0015393	alpha-Dimorphecolic acid	α-二吗啡酸	FA	脂肪酰类	Oxidized lipids	氧化脂质	C18H32O3	1	0.8994	73543-67-6	TRUE	TRUE	TRUE	5133.21	3770.13	5463.54	6699.02	5461.63	4558.59	83579.2	96960.3	90967.7	58514.2	63013	58872.4	1634.35	815.437	1811.09	704.435	544.277	689.252	812.248	641.071	1039.52	751.992	882.643	582.643	C14767
MW0000334	Ecgonine methyl ester	芽子碱甲酯	Alkaloids	生物碱	Tropan alkaloids	莨菪烷类生物碱	C10H17NO3	3	0.7891	7143-09-1	TRUE	TRUE	TRUE	298.774	307.054	410.482	256.256	274.377	463.805	1672.38	1960.58	1792.14	1832.98	1224.21	1239.6	38.402	142.95	29.416	17.361	23.757	37.265	42.878	37.802	31.085	41.869	7.598	35.266	-
MW0159863	Hypoxanthine	次黄嘌呤	Nucleotide and Its metabolites	核苷酸及其代谢物	Nucleotide and Its metabolites	核苷酸及其代谢物	C5H4N4O	1	0.9288	68-94-0	TRUE	TRUE	TRUE	51738.1	51234.4	45390.2	45851.2	50595.1	52553.8	197171	168896	176032	150458	184962	166021	20478.3	16690.9	15559.6	13995.2	18258.9	20553.1	94451.1	117922	95723.9	109720	97201.3	120718	C00262	1.80892
MW0103478	Adenosine monophosphate	5'-腺嘌呤核苷酸	Nucleotide and Its metabolites	核苷酸及其代谢物	Nucleotide and Its metabolites	核苷酸及其代谢物	C10H14N5O7P	1	0.9524	61-19-8	TRUE	TRUE	TRUE	9.48216e+06	9.18993e+06	9.66776e+06	1.03317e+07	7.51359e+06	1.00363e+07	4.94651e+06	5.91364e+06	5.18244e+06	5.62209e+06	5.5403e+06	5.29246e+06	6.78017e+06	9.40752e+06	6.1228e+06	6.6434e+06	5.86553e+06	4.73692e+06	4.14605e+06	4.19308e+06	5.5879e+06	4.1376e+06	5.14178e+06	4.33402e+06	C00020	1.32225
MEDN0383	FFA(18:2)	亚油酸	FA	脂肪酰类	FFA	游离脂肪酸	C18H32O2	1	0.9644	60-33-3	TRUE	TRUE	TRUE	38335.7	45089.5	67639.9	79863.3	76093.5	53105.7	295616	286188	262714	140663	128336	150737	34441.7	22667.6	17596.2	11963.5	29259.4	29808.8	9759.68	10487.4	9763.28	6445.2	4119.26	5602.25	C01595
MW0108239	Methotrexate	甲氨蝶呤	Heterocyclic compounds	杂环化合物	Pteridines and derivatives	蝶啶及其衍生物	C20H22N8O5	2	0.8805	59-05-2	TRUE	TRUE	TRUE	169206	157336	169291	198675	179362	182544	177737	176182	209385	181406	173018	158124	130379	169044	122072	121250	135263	142014	154894	166410	154922	149448	151536	161706	C01937
MEDP1130	Eicosa-8,11,14-trien-5-ynoic acid	5,6-脱氢花生四烯酸	FA	脂肪酰类	Oxidized lipids	氧化脂质	C20H30O2	1	0.9271	58688-54-3	TRUE	TRUE	TRUE	80693	78896.6	134382	116382	108190	73765.1	341461	330805	285359	159356	172497	183473	45457.6	32905.8	35809.4	25943.9	59219.2	47573.2	68242.2	78500.3	102358	60619	40431.2	56351.5	-
MW0106167	cis-Aconitic acid	乌头酸	Organic acid and Its derivatives	有机酸及其衍生物	Organic acid and Its derivatives	有机酸及其衍生物	C6H6O6	3	0.5891	585-84-2	TRUE	TRUE	TRUE	2947.44	2761.79	2825.74	3026.33	2848.42	3381.17	1049.63	1183.44	4956.82	2391.25	2132.34	2654.74	15191.3	10231.2	8628.6	8098.71	10750.4	1187.53	10844.4	2494.18	9297.32	9680.45	12641.4	10684.2	C00417
MW0169991	Uridine	尿嘧啶核苷	Nucleotide and Its metabolites	核苷酸及其代谢物	Nucleotide and Its metabolites	核苷酸及其代谢物	C9H12N2O6	1	0.6226	58-96-8	TRUE	TRUE	TRUE	12124.8	4400.74	7282.56	4579.12	5779.11	1877.87	1578.03	3604.58	3007.59	3716.26	5239.36	4607.84	2640.3	96.097	2689.79	326.798	463.451	306.02	310.9	340.775	160.143	362.3	326.02	455.877	C00299
MW0007329	Homovanillin	3-甲氧基-4-羟基苯乙醛；（4-羟基-3-甲氧基苯基）乙醛；高香草醛	Benzene and substituted derivatives	苯及其衍生物	Phenolics	苯酚类	C9H10O3	3	0.8955	5703-24-2	TRUE	TRUE	TRUE	2137.12	2169.14	2446.88	2573.64	2334.78	2222.69	735.713	612.287	625.695	711.934	869.234	596.283	573.947	779.825	765.941	679.423	718.935	860.339	263.02	11.834	281.179	107.545	205.814	270.599	C05581
MEDL02760	Glyceraldehyde	甘油醛	Aldehyde,Ketones,Esters	醛、酮、酯类	Aldehydes	醛类	C3H6O3	1	0.7763	56-82-6	TRUE	TRUE	TRUE	142300	118288	142466	129490	89999.6	89944.4	266856	232483	248404	222078	249633	228504	258955	203210	250167	255392	228190	273692	206587	312872	425466	419127	426176	457580	C02154
MW0121543	5-Hydroxytryptophan	5-羟基-L-色氨酸	Amino acid and Its metabolites	氨基酸及其代谢物	Amino acids	氨基酸	C11H12N2O3	1	0.7713	56-69-9 | 114-03-4 | 72572-98-6	TRUE	TRUE	TRUE	12370.5	10631.3	12949.2	12472.6	11778.1	11887.6	38187.9	31283.4	39858.2	39530.5	37821.9	36846.1	7008.08	6302.69	8438.6	8281.64	9056.53	11621	16236.4	16228.9	15197.7	14239.7	16013.7	12103.6	C01017
MW0109669	L-Serine	L-丝氨酸	Amino acid and Its metabolites	氨基酸及其代谢物	Amino acids	氨基酸	C3H7NO3	3	0.9106	56-45-1	TRUE	TRUE	TRUE	6015.24	7805.73	7683.5	8216.14	3422.72	7037.74	7155.1	6685.33	4640.16	9044.38	7985.82	9360.14	227.833	109.251	134.778	312.195	341.236	880.514	264.996	403.318	1758.23	1282.92	911.272	1683.44	C00065	10.2349
MW0052509	Eicosadienoic acid	二十碳二烯酸	FA	脂肪酰类	FFA	游离脂肪酸	C20H36O2	1	0.9583	5598-38-9	TRUE	TRUE	TRUE	4223.81	2586.1	6110.75	5581.17	4557.97	3320.68	309121	382333	288713	151074	153154	230137	1432.58	1780.2	1945.13	3345.73	2757.05	3157.66	8145.6	8494.61	8157.68	6336.6	5302.36	1604.07	C16525
MW0168231	Miraxanthin-V	美紫杉素-V	Organic acid and Its derivatives	有机酸及其衍生物	Organic acid and Its derivatives	有机酸及其衍生物	C17H18N2O6	3	0.9393	5375-64-4	TRUE	TRUE	TRUE	4493.29	5058.16	6001.98	8551.5	6525.71	4318.74	7459.38	7103.33	9246.94	6297.98	6513.81	6221.05	3049.57	4235.27	3553.77	4751.24	3324.93	4316.98	2789.38	4661.43	3503.55	3377.65	3144.05	2365.08	C08557
MW0054786	(2E,4E)-11-Methoxy-3,7,11-trimethyldodeca-2,4-dienoic acid	甲戊二烯酸	Terpenoids	萜类	Sesquiterpenoids	倍半萜	C16H28O3	2	0.7278	53092-52-7	TRUE	TRUE	TRUE	659.469	545.979	750.22	722.482	651.705	637.95	3237.6	2840.7	3031.78	2417.72	6202.11	2313.02	7.954	14.67	8.571	6.251	6.605	11.844	3.877	176.321	0.734	3.646	6.007	3.088	-
MW0007319	Hippuric acid	马尿酸	Organic acid and Its derivatives	有机酸及其衍生物	Organic acid and Its derivatives	有机酸及其衍生物	C9H9NO3	1	0.7728	495-69-2	TRUE	TRUE	TRUE	23070.8	19495.1	23089.2	21722.5	19638.8	21955.3	20834.2	21412.2	24958.9	24291.9	24897.8	23432.9	5610.53	6623.23	6317.99	6331.94	7736.12	9263.93	12019.5	10895.1	17342.4	11207.2	9690.3	8484.55	C01586
MEDL02411	5-hydroxy-L-tryptophan	5-羟基-色氨酸	Amino acid and Its metabolites	氨基酸及其代谢物	Amino acid derivatives	氨基酸衍生物	C11H12N2O3	1	0.7398	4350-09-8	TRUE	TRUE	TRUE	1230.08	1354.11	1735.21	1886.6	1365.01	2227.15	4748.54	3256.56	5341.79	3004.31	3344.44	2920.73	928.752	916.572	675.528	561.162	984.219	614.29	1123.35	449.115	716.573	645.377	966.744	429.502	C00643	3.59714
MW0112028	Suprofen	舒洛芬	Benzene and substituted derivatives	苯及其衍生物	Benzene and substituted derivatives	苯及其衍生物	C14H12O3S	2	0.6667	40828-46-4	TRUE	TRUE	TRUE	28285.5	25822.1	31063	34006.2	25717.3	32707.3	34135.2	30224.8	39977.9	36344.8	32710.1	33764.2	49206.5	44720.5	36361.1	39923.7	38379.2	27376.2	49396.8	31043.1	50469.1	50674.7	54127.6	56762.9	C07320
MW0108024	Lys-Trp-Lys	L-赖氨酸-L-色氨酸-L-赖氨酸	Amino acid and Its metabolites	氨基酸及其代谢物	Small Peptide	小肽	C23H36N6O4	2	0.8287	38579-27-0	TRUE	TRUE	TRUE	1139.62	750.026	1167.54	1700.31	1348.48	834.688	12912.3	16566.1	16169.1	14893.5	12975.5	11647	115.762	117.807	71.465	78.178	46.855	12.478	27.191	124.776	81.22	51.42	11.547	6.237	-
MW0144865	Rhamnose	鼠李糖	Carbohydrates and Its metabolites	碳水化合物及其代谢物	Sugars	糖类	C6H12O5	1	0.8584	3615-41-6	TRUE	TRUE	TRUE	252819	275999	321854	317185	268985	261707	312381	290673	366463	347500	342635	332961	389199	317181	368240	367139	360754	390560	574800	390656	555797	641287	587428	605041	C00507
MW0053743	Deoxycholic acid glycine conjugate	脱氧胆酸甘氨酸结合物	Organic acid and Its derivatives	有机酸及其衍生物	Organic acid and Its derivatives	有机酸及其衍生物	C26H43NO5	1	0.9007	360-65-6	TRUE	TRUE	TRUE	6081.87	6378.83	5970.13	6500.16	5798.89	4904.06	4550.28	5285.55	3709.21	4165.21	5847.95	4943.3	1009.11	1638.76	1636.46	899.104	1610.09	2005.42	2273.69	3711.21	2027.37	2587.54	1645.89	1171.44	C05464
MW0157935	Timepidium bromide	溴化溴铵	Alcohol and amines	醇、胺类	Amines	胺类	C17H22BrNOS2	3	0.6735	35035-05-3	TRUE	TRUE	TRUE	17151.2	15558.4	17456.9	17891	18634.2	16893.5	14039.5	14983.1	19742.9	16915.5	14639.8	14308.6	11245.3	11862.6	12194.2	12715	15384.2	17217.7	14395.7	15304.4	13353.4	10325.2	10850.4	11879.4	-
MW0062382	Dipalmitoylphosphatidylserine	二棕榈酰磷脂酰丝氨酸	GP	甘油磷脂类	PS	磷脂酰丝氨酸	C38H74NO10P	2	0.6151	3036-82-6	TRUE	TRUE	TRUE	27584.8	45677	72213.7	104381	86753	87755.2	97480.6	112523	128575	90422.8	107821	115953	24459.2	38021.4	18091.7	25180.8	29366.9	17861.6	99691.1	75445	88824.9	83837.6	31816.9	80155.7	-
MW0005071	4-Chloro-4'-hydroxybiphenyl	4-氯-4′-联苯酚；4-氯-4′-羟基联苯	Benzene and substituted derivatives	苯及其衍生物	Benzene and substituted derivatives	苯及其衍生物	C12H9ClO	2	0.7159	28034-99-3	TRUE	TRUE	TRUE	35194.4	40716	46961.6	47503.3	39704.8	37607.3	44921.6	24562.6	51313.9	49136.7	49967	48284.3	60103.2	48608.9	55645.1	55783.9	50882.5	57976.9	76582.4	48342.4	81331.9	85562.8	90134.9	89272.9	-
MW0015362	8-Oxohexadecanoic acid	8-氧代十六烷酸	FA	脂肪酰类	Oxidized lipids	氧化脂质	C16H30O3	3	0.8053	2777-52-8	TRUE	TRUE	TRUE	186.092	218.785	249.398	205.715	161.201	129.347	10726.6	11796.6	11532.7	8250	7896.95	7785.48	62.032	124.268	125.185	89.954	77.302	89.92	195.54	58.267	43.258	47.168	29.138	60.352	-
MW0137394	Apiin	阿皮因	Flavonoids	黄酮	Flavonoid	黄酮	C26H28O14	2	0.7205	26544-34-3	TRUE	TRUE	TRUE	150.5	298.425	441.178	264.847	227.115	254.469	8260.48	5414.62	6771.19	7106.88	6573.31	5687.62	10.076	30.989	43.112	280.394	20.758	9.378	118.679	19.406	38.796	61.801	998.437	416.671	C04858
MW0063596	Sorbitan, monohexadecanoate	山梨糖醇单十六酸酯	FA	脂肪酰类	Others	其他	C22H42O6	2	0.7028	26266-57-9	TRUE	TRUE	TRUE	22815.1	16647.7	21008.3	23803.1	22273	18171.5	127058	170743	166589	156296	136522	120630	96.567	205.557	13133.8	63.126	11954.9	15400.8	47626.2	44665.9	43849	38990.4	194.521	47879.8	-
MEDL02773	Indoleacetaldehyde	吲哚-3-乙醛	Heterocyclic compounds	杂环化合物	Indole and Its derivatives	吲哚及其衍生物	C10H9NO	1	0.9462	2591-98-2	TRUE	TRUE	TRUE	27034.1	26016.2	26982.6	25358	25235.8	26866.5	64678.1	55415.7	72152.4	70902.6	73495	68074.5	18731.2	18438.5	18563.3	17401.8	22841.9	24728.9	39130.3	40102.1	37578.8	33337.1	33450.5	36261.4	C00637	1.65082
MW0194137	8Z,11Z,14Z,17Z-eicosatetraenoic acid	8Z,11Z,14Z,17Z-eicosatetraenoic acid	FA	脂肪酰类	Oxidized lipids	氧化脂质	C20H32O2	1	0.964	24880-40-8	TRUE	TRUE	TRUE	162983	118206	161825	234914	252707	141038	1.17236e+06	1.3363e+06	1.17152e+06	539128	487270	436370	109677	96518.6	88061.7	51090.4	145636	117903	191562	158934	137352	138045	110409	101416	-
MW0014242	3-Oxocholic acid	3-氧代胆酸	Organic acid and Its derivatives	有机酸及其衍生物	Organic acid and Its derivatives	有机酸及其衍生物	C24H38O5	2	0.5425	2304-89-4	TRUE	TRUE	TRUE	1514.04	1674.8	1970.37	1857.83	1125.02	725.937	18993.9	22650.1	21220.8	24590.3	21087.2	19690.1	119.647	271.74	58.173	92.985	54.185	14.96	29.412	134.963	108.833	39.024	8.994	17.707	-
MW0103639	Orotidylic acid	乳清酸	Nucleotide and Its metabolites	核苷酸及其代谢物	Nucleotide and Its metabolites	核苷酸及其代谢物	C10H13N2O11P	2	0.7729	2149-82-8	TRUE	TRUE	TRUE	206259	209697	223563	214599	212170	203653	178633	164674	202778	189885	201952	169216	162056	172438	175744	171132	199601	224370	165564	173471	149221	91881.7	143244	154259	C01103
MW0147019	Callystatin A	加利他汀 A	Heterocyclic compounds	杂环化合物	Heterocyclic compounds	杂环化合物	C29H44O4	3	0.6819	189883-16-7	TRUE	TRUE	TRUE	5758.08	4962.28	6942.41	7402.18	7334.77	4827.86	229.458	234.331	167.433	168.735	239.761	135.992	913.65	52.205	17.853	1048.59	12.961	38.962	327.412	325.488	315.968	311.42	356.355	260.72	C16891
MW0105040	3-Hydroxydodecanoic acid	3-羟基十二烷酸	Organic acid and Its derivatives	有机酸及其衍生物	Organic acid and Its derivatives	有机酸及其衍生物	C12H24O3	3	0.8368	1883-13-2 | 53941-38-1	TRUE	TRUE	TRUE	1695.16	1327.37	1505.47	1731.18	1280.94	1343.06	18431.5	22630.8	18514.3	21275.5	22048.8	17611.7	1435.52	917.681	1165.14	864.492	1180.25	569.033	5130.3	2296.46	4488.73	4047.19	3505.12	5042.1	-
MW0114283	Diprogulic Acid	双丙戊酸	Organic acid and Its derivatives	有机酸及其衍生物	Organic acid and Its derivatives	有机酸及其衍生物	C12H18O7	2	0.666	18467-77-1 | 68539-16-2	TRUE	TRUE	TRUE	36823.4	34309.2	37375.7	46899.1	41058.4	35600.5	30406.8	39830.9	40771.3	40557.4	32951.7	29957.3	24811.8	32499.5	28924.5	25300.3	28251.3	36814.7	25450.6	29134.7	24440.6	25531.7	25695.6	22803.7	C18825
MW0006716	D-Aspartic acid	D-天冬氨酸	Organic acid and Its derivatives	有机酸及其衍生物	Organic acid and Its derivatives	有机酸及其衍生物	C4H7NO4	3	0.906	1783-96-6	TRUE	TRUE	TRUE	385.833	307.821	439.711	366.601	176.724	157.233	4560.58	4471.99	3986.79	4278.94	3307.5	5381.71	481.022	580.721	860.317	580.556	830.315	440.195	19305.6	13294.8	20010	19058.8	19286.3	20773.7	C00402
MW0103548	dTDP-4-dehydro-6-deoxy-alpha-D-glucose	DTDP-4-氧代-6-脱氧-D-葡萄糖；DTDP-4-脱氢-6-脱氧-D-葡萄糖；dTDP-4-脱氢-6-脱氧-α-D-葡萄糖；DTDP-4-脱氢-6-脱氧-α-D-吡喃葡萄糖；dTDP-4-氧代-6-脱氧-α-D-葡萄糖；dTDP-4-脱氢-6-脱氧-α-D-半乳糖；DTDP-4-脱氢-6-脱氧-D-半乳糖；DTDP-6-脱氧-D-木糖-己糖-4-酮糖；DTDP-6-脱氧-D-木糖-4-己酮糖；4，6-二脱氧-4-氧代-DTDP-D-葡萄糖	Nucleotide and Its metabolites	核苷酸及其代谢物	Nucleotide and Its metabolites	核苷酸及其代谢物	C16H24N2O15P2	3	0.6239	16752-71-9	TRUE	TRUE	TRUE	9724.59	7063.92	10130.2	12293.6	14753.2	12854.4	3327.24	3657.99	2724.92	2366.24	4053.57	5569.69	13586.6	18158.3	23632.8	18528	23028.4	16304.3	38054	24248.3	43245.4	47526.5	51437.5	77674.2	C11907
MW0006786	Dichlorprop-P	（R)-(2，4-二氯苯氧基）丙酸酯；（R)-二氯丙酸	Benzene and substituted derivatives	苯及其衍生物	Benzene and substituted derivatives	苯及其衍生物	C9H8Cl2O3	2	0.745	15165-67-0	TRUE	TRUE	TRUE	58270	54701.3	62592.9	67631.1	64870.3	57403.5	60540.9	62008.1	76405.4	63919.5	61452.1	57300	178679	156943	117923	121923	129033	48927.8	154764	59721	147012	153092	170415	155864	C20685 | C72877
MW0170020	Xanthosine	黄嘌呤核苷	Nucleotide and Its metabolites	核苷酸及其代谢物	Nucleotide and Its metabolites	核苷酸及其代谢物	C10H12N4O6	1	0.9634	146-80-5	TRUE	TRUE	TRUE	51850.5	45936.3	55247.6	53103.8	49555.3	50922.5	185741	164163	141725	170297	167834	175252	13215.9	12883.3	13799.6	13163.7	12590.5	17411.1	58855.1	51185.6	53135.9	59372.4	57528.8	57472.1	C01762	3.11837
MW0115839	(2E)-3-(1H-indol-2-yl)prop-2-enoic acid	吲哚丙烯酸	Organic acid and Its derivatives	有机酸及其衍生物	Organic acid and Its derivatives	有机酸及其衍生物	C11H9NO2	3	0.7753	143618-94-4 | 606493-58-7	TRUE	TRUE	TRUE	7588.54	6653.18	6030.74	7500.6	8130.38	6213.61	7580.07	7831.54	10484.5	8361.15	8279.18	8409.63	5390.21	5093.74	4498.95	4433.35	4700.46	6240.86	5451.36	6634.02	7094.29	6926.91	7233.32	7353.32	-
MW0105037	3-Hydroxydecanoic acid	3-羟基癸酸	Organic acid and Its derivatives	有机酸及其衍生物	Organic acid and Its derivatives	有机酸及其衍生物	C10H20O3	3	0.8782	14292-26-3 | 5561-87-5 | 33044-91-6	TRUE	TRUE	TRUE	1529.91	1204.59	1528.4	1483.64	1094.71	1169.59	10269.6	11754.7	10784.7	12546.7	12216.5	9905.88	970.089	1137.02	918.198	1069.81	1047.33	1063.44	1672.99	1319.55	1544.74	1170.35	1205.44	1757.47	-
MW0103600	Inosinic acid	肌苷酸	Nucleotide and Its metabolites	核苷酸及其代谢物	Nucleotide and Its metabolites	核苷酸及其代谢物	C10H13N4O8P	1	0.9313	131-99-7 | 30918-54-8 | 25249-22-3	TRUE	TRUE	TRUE	2.38189e+06	2.49892e+06	2.48537e+06	2.66979e+06	2.25674e+06	2.30028e+06	1.81259e+06	1.68465e+06	1.83678e+06	2.00362e+06	1.5646e+06	1.84753e+06	1.61447e+06	618144	747314	1.9014e+06	1.46971e+06	1.47368e+06	1.28501e+06	697463	754198	999877	533579	1.19335e+06	C00130	1.90716
MW0113863	2'-Adenylic acid	腺苷-2'-磷酸	Nucleotide and Its metabolites	核苷酸及其代谢物	Nucleotide and Its metabolites	核苷酸及其代谢物	C10H14N5O7P	2	0.9457	130-49-4 | 81012-86-4	TRUE	TRUE	TRUE	331470	269569	546022	535779	359696	426818	109242	132311	57758.4	95335.9	98202.6	115465	45504.1	407056	234095	136410	14309	61633.1	18435.4	47968.7	65004.7	38857.1	42539.5	6458.43	C00946
MW0002614	Tyrphostin A51	酪氨酸蛋白 A51	Benzene and substituted derivatives	苯及其衍生物	Phenolics	苯酚类	C13H8N4O3	2	0.6823	126433-07-6 | 122520-90-5	TRUE	TRUE	TRUE	5418.92	5453.19	11711	8672.78	7891.88	2488.02	8848.82	6908.88	8147.54	8278.88	9051.05	9770.65	15504.8	11022.3	14622.3	14092.5	9030.49	10490.4	18941.5	6752.78	24333.9	31552.1	15320.1	12456	-
MW0143501	Icosa-5,14-dienoic acid	二十碳五，14-二烯酸	Organic acid and Its derivatives	有机酸及其衍生物	Organic acid and Its derivatives	有机酸及其衍生物	C20H36O2	2	0.6218	122055-58-7	TRUE	TRUE	TRUE	420.5	505.344	728.659	812.731	338.512	432.683	9238.39	9394.19	10107.6	10384.1	8792.92	8015.95	177.938	303.832	159.646	246.881	267.185	432.65	265.685	114.68	469.027	261.9	180.33	255.06	-
MW0055248	N-Arachidonoyl Taurine	N-花生四烯酸牛磺酸	FA	脂肪酰类	FFA	游离脂肪酸	C22H37NO4S	2	0.9241	119959-65-8	TRUE	TRUE	TRUE	2932.41	2900.62	4453.68	4023.16	3546.37	2671.32	51824	61947.8	58981.1	48157.6	40963.9	40655.6	12520.8	12419.4	11297.2	10726.4	11623.7	19828.3	2942.45	3322.94	592.056	648.241	3022.86	1094.96	-
MW0125869	N-Nitrosothialdine	N-亚硝基噻吩	Heterocyclic compounds	杂环化合物	Heterocyclic compounds	杂环化合物	C6H12N2OS2	3	0.5246	114375-58-5	TRUE	TRUE	TRUE	8258.82	8523.33	8394.73	7627.77	6809.9	7572.1	13954.3	11512.3	7920.81	10775.5	11646.3	13263.2	4008.41	5923.49	5900.53	6498.32	5537.4	6657.68	8497.58	8610.13	6727.32	7814.09	5223.8	8473.44	-
MW0108714	N-Caffeoyltryptophan	N-咖啡酰色氨酸	Amino acid and Its metabolites	氨基酸及其代谢物	Amino acid derivatives	氨基酸衍生物	C20H18N2O5	3	0.6795	109163-69-1	TRUE	TRUE	TRUE	44401.2	40727.3	50515.9	46372.9	41300.3	43138.8	66233.1	72668.3	80885.5	80059.8	70111.6	67385.4	47447.8	57189.1	56192.9	52151.4	53328.8	63310.5	22823.2	29502.2	21688.3	21346.3	22860.5	24650.6	-
MW0010504	Anwulignan	安武里尼昂	Lig-s and Coumarins	木脂素和香豆素	Lig-s	木脂素	C20H24O4	2	0.653	107534-93-0	TRUE	TRUE	TRUE	66170.4	61268.9	63027.5	66997.1	64834.2	56145.4	52099.9	61918.2	61596.2	62123.7	53272.7	51154.5	42308.8	50614.6	49675	44889	45210.6	57149.3	42571.6	36210.5	32281.5	33938	36383.6	37783.8	-
MW0103082	(2R,3R,6R)-2,3-dihydroxy-6-[(3R,5R,8R,9S,10S,13R,14S,17R)-3-hydroxy-10,13-dimethyl-2,3,4,5,6,7,8,9,11,12,14,15,16,17-tetradecahydro-1H-cyclopenta[a]phenanthren-17-yl]heptanoic acid	戊酸	Bile acids	胆汁酸	Bile acids	胆汁酸	C26H44O5	3	0.5547	1061-64-9	TRUE	TRUE	TRUE	209436	176964	234375	187303	187970	185860	539343	611022	616702	634060	543228	544884	45391.9	57023	52532.4	51307.6	55996.3	48299.4	212802	205471	222887	263276	269489	228845	-
MW0011183	(3beta,22E,24R)-Ergosta-4,6,8(14),22-tetraen-3-ol	-	Alcohol and amines	醇、胺类	Alcohols	醇类	C28H42O	3	0.8379	104729-39-7	TRUE	TRUE	TRUE	207.679	431.539	350.145	405.397	318.414	568.261	7504.72	10292.4	9522.72	8531.76	7912.08	9018.52	15.427	449.677	23.975	27.362	14.244	12.291	106.461	918.178	11.969	414.632	29.177	773.137	-
MW0168405	L-Isoleucine	L-别异亮氨酸	Amino acid and Its metabolites	氨基酸及其代谢物	Amino acids	氨基酸	C6H13NO2	1	0.9898	-	TRUE	TRUE	TRUE	249944	248407	260995	268904	247533	266836	610960	528568	630695	575504	634166	591335	170576	177740	172022	164102	195604	211713	389964	288698	371307	341067	336496	362717	C00407
MEDN0391	3-Deoxy-D-Lyxo-Heptopyran-2-ularic Acid	二十二碳六烯酸	FA	脂肪酰类	Oxidized lipids	氧化脂质	C7H10O8	1	0.9678	-	TRUE	TRUE	TRUE	111626	95998.9	143431	171071	146352	103948	1.04359e+06	932383	861023	480599	445972	451675	101636	91268.6	84551.5	61523.5	90046.1	115142	181770	164883	187092	122318	108727	128336	C21044
MEDN1267	LPE(0:0/22:5)	LPE(0:0/22:5)	GP	甘油磷脂类	LPE	溶血磷脂酰乙醇胺	C27H46NO7P	1	0.9108	-	TRUE	TRUE	TRUE	740277	773936	922232	1.17514e+06	1.00442e+06	859125	666053	1.14707e+06	1.31972e+06	1.07061e+06	903345	862173	311532	529684	531970	512519	782643	625524	545624	625116	705579	818575	699681	645612	-
MW0012846	[2-hydroxy-3-[(9Z,12Z)-octadeca-9,12-dienoyl]oxypropyl] 2-(trimethylazaniumyl)ethyl phosphate	[2-hydroxy-3-[(9Z,12Z)-octadeca-9,12-dienoyl]oxypropyl] 2-(trimethylazaniumyl)ethyl phosphate	GP	甘油磷脂类	PC	磷脂酰胆碱	C26H50NO7P	2	0.9482	-	TRUE	TRUE	TRUE	55789.3	49276.4	60103.2	61761.8	63155.8	59477	338933	414791	371285	338070	284286	281844	25713.1	28281.3	31316.8	24018.3	30578.6	47048.1	48811.7	46555.3	39830	41971.7	40715.4	38527.6	-
MW0151682	Ile-Nap-OH	-	Amino acid and Its metabolites	氨基酸及其代谢物	Small Peptide	小肽	C24H24N2O6	2	0.9017	-	TRUE	TRUE	TRUE	108928	99785	110685	140077	123109	105881	112956	106263	124572	103077	109527	102032	84901.8	119297	78768.4	74418.7	78752.2	87235.1	87766.3	88378.2	93288.1	87199.1	102669	103014	-
MW0152618	Leu-Nap-OH	-	Amino acid and Its metabolites	氨基酸及其代谢物	Small Peptide	小肽	C24H24N2O6	2	0.8873	-	TRUE	TRUE	TRUE	100040	86762.5	94557.4	116560	100412	106733	96991.8	98018.8	117978	120298	97967.5	89314.2	79245	103388	73303.1	70237.1	78613.1	78514.5	81375.5	91577.1	79665.9	84947.8	89492.6	90982.8	-
MW0155501	Phe-TyrMe-OH	-	Amino acid and Its metabolites	氨基酸及其代谢物	Small Peptide	小肽	C24H22N2O7	2	0.8766	-	TRUE	TRUE	TRUE	47977.4	44649.1	54142.1	57343.8	47348.5	45474.5	50889.2	47912.1	55924.9	50672.6	48202.4	44913.7	34724.1	50205.8	32321.7	33490.8	34611.2	36755.7	35264.4	36029.9	36035.9	35874.9	41662.5	47349.2	-
MW0153929	Misoprostol(free acid)-d5	-	Hormones and hormone related compounds	激素及激素相关物质	Hormones and hormone related compounds	激素及激素相关物质	C21H31D5O5	2	0.8678	-	TRUE	TRUE	TRUE	13895	14681.8	16251.4	16967	14351.8	15915	124956	138148	145934	152184	126080	128981	140.662	9092.22	10877.8	7096.65	23.952	9.86	19.862	25.76	41.106	26294.6	24381.6	32933.6	-
MW0150910	His-Gln-Val-Lys	组氨酸-谷酰胺-缬氨酸-赖氨酸	Amino acid and Its metabolites	氨基酸及其代谢物	Small Peptide	小肽	C22H38N8O6	2	0.8166	-	TRUE	TRUE	TRUE	56977.2	50591.6	43800.9	64949.9	40455.3	49913.7	72104.4	79002.2	69797.8	75031.8	53269.6	56635.3	24692.2	7687.43	22193.9	25162.3	20587.7	33680	23805.8	23105.4	21749.1	18720.9	16447.6	10825.6	-
MW0139075	N-(4-methyl-2-oxochromen-7-yl)icosa-5,8,11,14-tetraenamide	N-(4-methyl-2-oxochromen-7-yl)icosa-5,8,11,14-tetraenamide	Alcohol and amines	醇、胺类	Amines	胺类	C30H39NO3	2	0.7418	-	TRUE	TRUE	TRUE	22083.5	20349	22943.5	33130.5	24557.4	23882.9	128443	208357	189662	147915	138500	138733	5922.62	8506.55	9927.03	6978.33	7071.43	52.039	22090.7	20319.4	19118.4	17.672	16871.3	22241.9	-
MW0149761	Gln-Lys-Phe-Arg	谷酰氨-赖氨酸-苯丙氨酸-精氨酸	Amino acid and Its metabolites	氨基酸及其代谢物	Small Peptide	小肽	C26H43N9O6	2	0.6947	-	TRUE	TRUE	TRUE	7323.74	4989.53	5674.65	5655.27	5644.45	5908.71	26129.5	36404.5	55580.2	33388.5	45426.9	23080.7	3022.32	4590.91	2699.52	2655.95	3351.59	5494.56	4817.38	9318.47	1259.76	1874.73	2854.67	1816.19	-
MW0057932	PC(P-18:0/20:4(5Z,8Z,11Z,14Z))	1-(1Z-十八碳烯基)-2-(5Z，8Z，11Z，14Z-二十碳四烯酰基)-sn-甘油-3-磷酸胆碱	GP	甘油磷脂类	PC-P	磷脂酰胆碱	C46H84NO7P	2	0.6805	-	TRUE	TRUE	TRUE	12823.6	11976	16851.2	11477.8	17136.6	16681.1	49128.8	44798.5	41293.9	40466	37723.9	31203.1	3839.75	2920.51	5255.99	4502.27	3685.71	4253.99	7169.51	9818.85	14991.8	40.362	8024.5	11915.5	-
MW0156476	S1P Lyase Fluorogenic Substrate	-	Benzene and substituted derivatives	苯及其衍生物	Benzene and substituted derivatives	苯及其衍生物	C14H18NO8P	2	0.6616	-	TRUE	TRUE	TRUE	1519.95	1201.86	1253.63	1203.53	1433.41	1264.71	3456.12	3001.47	2677.78	2033.09	2435.89	2645.94	577.429	866.387	355.468	735.587	600.617	1285.24	2166.72	1584.13	1636.31	573.247	2927.41	1530.6	-
MW0144244	Acetoxy-10-gingerol	-	Benzene and substituted derivatives	苯及其衍生物	Benzene and substituted derivatives	苯及其衍生物	C23H36O5	2	0.6484	-	TRUE	TRUE	TRUE	1824.11	332.472	2226.47	2078.65	719.718	1684.29	17044.3	18770.9	21506.9	19471.9	17709.7	17980.2	121.063	203.112	96.55	121.018	54.844	14.802	31.161	136.624	110.172	59.16	13.681	14.899	-
MW0012973	1-Palmitoyl-2-oleoyl-sn-glycero-3-phosphate	1-棕榈酰基-2-油酰基-sn-甘油-3-磷酸	GP	甘油磷脂类	PA	磷脂酸	C37H71O8P	2	0.6392	-	TRUE	TRUE	TRUE	18362.6	26781.7	20604.9	30813.1	18126.8	23645.1	37425.3	27526.8	35458.2	32261.2	28774.9	29016.2	14362.7	12667.1	7259.12	15043.2	9929.18	12831.9	16808.3	11958.2	20406.3	20971.2	18295.8	25821.3	C00416	1.76436
MW0054485	1-Palmitoylglycerol 3-phosphate	LPA(16:0/0:0)	GP	甘油磷脂类	LPA	溶血磷脂酸	C19H39O7P	2	0.5569	-	TRUE	TRUE	TRUE	32506.3	29744	32903.3	33437.9	32064.7	31555.4	132421	138197	151958	152060	137828	131097	29.093	10833.7	9658.17	6848.36	12251.1	12860.6	19.678	25.906	14.418	44.995	11368.3	12.928	C04036
MW0152934	Lys-Gln-Asp-Lys	-	Amino acid and Its metabolites	氨基酸及其代谢物	Small Peptide	小肽	C21H39N7O8	2	0.5288	-	TRUE	TRUE	TRUE	574054	630945	653422	853572	652790	757010	1.11768e+06	982815	1.09664e+06	1.13587e+06	925160	739510	626566	611370	226524	313577	567530	473518	729437	625506	516137	303175	717572	1.07609e+06	-
MW0140348	(3E)-3-[(1R,5R,6S)-5-hydroxy-7-oxabicyclo[4.1.0]heptan-2-ylidene]pyruvic acid	(3E)-3-[(1R,5R,6S)-5-hydroxy-7-oxabicyclo[4.1.0]heptan-2-ylidene]丙酮酸	Aldehyde,Ketones,Esters	醛、酮、酯类	Esters	酯类	C9H10O5	3	0.8411	-	TRUE	TRUE	TRUE	26582.5	19747.4	24128.8	30906.4	26795.6	25829.7	26840.2	30512.7	34251.1	28199.5	27770.9	23722.5	140317	126312	92615.8	83620.9	94971.5	23918.5	125350	26502.9	117632	115759	134272	109750	C21086
MW0161475	Benzoyl-beta-D-glucoside	苯甲酰-β-D-葡萄糖苷	Benzene and substituted derivatives	苯及其衍生物	Benzene and substituted derivatives	苯及其衍生物	C13H16O7	3	0.8218	-	TRUE	TRUE	TRUE	40818.5	42100.2	45919.6	45114.8	39806.8	41136.7	31510.1	32296.8	38330.1	32279.6	31407.7	30239.4	15392.5	16615	13929	14941.7	13871	17558.3	7501.48	7033.33	2386.62	7516.75	7068.78	9452.26	-
MW0156503	Salicin 6-phosphate	水杨苷6-磷酸	Organic acid and Its derivatives	有机酸及其衍生物	Organic acid and Its derivatives	有机酸及其衍生物	C13H19O10P	3	0.6921	-	TRUE	TRUE	TRUE	7602.77	5965.53	9297.67	7589.81	6280.7	6689.27	9752.46	12230.8	7137.09	11352.8	9652.56	9670.52	951.651	1242.66	780.599	891.993	757.197	1537.04	301.924	642.874	840.489	683.871	714.077	292.848	C06188
MW0143834	2-Methyl-6-geranylgeranyl-1,4-benzoquinol	6-香叶基香叶基-2-甲基苯-1，4-二醇	Benzene and substituted derivatives	苯及其衍生物	Benzene and substituted derivatives	苯及其衍生物	C27H40O2	3	0.6759	-	TRUE	TRUE	TRUE	3177.37	2123.64	4465.03	3545.8	3446.31	3352.4	835.433	784.074	1332.63	2063.75	443.211	755.2	4906.9	6487.27	5834.25	5572.59	5762.33	8665.51	3653.93	5517.42	4004.35	3790.19	3953.04	3641.33	C20737
MW0149292	Fructoselysine 6-phosphate	6-磷酸果糖赖氨酸	Organic acid and Its derivatives	有机酸及其衍生物	Organic acid and Its derivatives	有机酸及其衍生物	C12H25N2O10P	3	0.6471	-	TRUE	TRUE	TRUE	13557.7	12365.2	12090.3	15119.1	16333.7	11939.9	13559.1	14143.8	16120.3	15125.1	14989.1	12909.9	8636.43	10226	8424.68	8095.84	11131.9	11107.5	13481.1	12681	12023.6	13142.5	13310.3	13586.3	-
MW0140648	(S)-2-Hydroxypropylphosphonic acid	(S)-2-羟基丙基磷酸酯	Organic acid and Its derivatives	有机酸及其衍生物	Organic acid and Its derivatives	有机酸及其衍生物	C3H9O4P	3	0.6093	-	TRUE	TRUE	TRUE	853.171	1060.12	902.481	1446.16	5863.59	1665.87	869.197	2479.67	2183.69	462.352	1437.91	737.592	14662.4	11180.1	7878.04	8710.26	10611.3	1036.66	11312	4177.47	12117.8	14880.2	11939.7	12118.2	C06452
MW0157447	Tetranactin	四联素	Heterocyclic compounds	杂环化合物	Heterocyclic compounds	杂环化合物	C44H72O12	3	0.8921	-	TRUE	TRUE	TRUE	6121.59	1682.61	1034.64	38360.3	2799.51	6625.91	49074	27523.6	41454.6	26668.7	22913.9	18463.1	146827	138665	141414	62501.8	24410.8	22213.1	34662.7	137004	81911.4	74325.8	47377.2	107509	C06764
MW0158813	Undecylprodigiosin	十一烷基紫红甙	Amino acid and Its metabolites	氨基酸及其代谢物	polypeptide	多肽	C25H35N3O	3	0.8156	-	TRUE	TRUE	TRUE	866.917	806.519	617.957	1144.4	774.189	213.084	10297.8	11364.9	11279.2	12166.4	10577.3	9844.52	567.441	328.817	19.587	150.197	161.003	12.055	886.159	1200.96	343.326	454.628	703.784	529.805	-
MW0013061	2-(Methoxycarbonyl)-5-methyl-2,4-bis(3-methyl-2-butenyl)-6-(2-methyl-1-oxopropyl)-5-(4-methyl-3-pentenyl)cyclohexanone	2-(甲氧羰基)-5-甲基-2,4-双(3-甲基-2-丁烯基)-6-(2-甲基-1-氧丙基)-5-(4-甲基-3-戊烯基)环己酮	Aldehyde,Ketones,Esters	醛、酮、酯类	Ketones	酮类	C29H46O4	3	0.7495	-	TRUE	TRUE	TRUE	2716.11	3376.91	4742.79	4592.38	3779.83	2211.05	31531.3	47945.4	28403.4	34653.8	26199	31979	1377.81	1012.11	918.441	1351.43	1056	1482.3	3397.91	4619.36	4464.82	4895.67	5878.72	27.687	-
MW0140371	(3R,2'S)-Myxol 2'-(2,4-di-O-methyl-alpha-L-fucoside)	(3R,2'S)-Myxol 2'-(2,4-二-O-甲基-α-L-岩藻糖苷)	Aldehyde,Ketones,Esters	醛、酮、酯类	Aldehydes	醛类	C48H70O7	3	0.6626	-	TRUE	TRUE	TRUE	71087.4	62726.4	54340.9	39733	36584.9	49731.1	78258.1	60526.1	68304	75945.9	65391.1	85908.6	23940.8	5413.47	6650.28	20762.7	19968.2	48783.1	37667.9	26715.2	37469.8	61577.7	37439.1	88200.6	-
MW0055514	Oxepahyperforin	奥西帕海福林	Terpenoids	萜类	Ditepenoids	二萜	C35H52O5	3	0.6537	-	TRUE	TRUE	TRUE	2797.32	930.646	860.645	1147.63	2122.5	1299.55	9491.9	13993	17497.7	11900.6	7804.39	9979.82	2855.86	4330.4	2204.91	2171.05	5093.28	4121.12	30587.7	39152.4	28616.4	28192.5	28054.6	30413	-
MW0145000	2,2':5',2''-Terthiophene	α-三噻吩基；三噻吩	Heterocyclic compounds	杂环化合物	Heterocyclic compounds	杂环化合物	C12H8S3	3	0.6193	-	TRUE	TRUE	TRUE	10622.2	19058.1	20796.4	21095	20415.6	20024.1	19803.3	19128.8	24912.8	19259.4	18464.3	17706.2	43905.3	44312.9	29799.6	30885.5	31612	14847.7	34131.7	11132.4	34796.7	36412.3	34770.6	36219.2	C08460
MW0138209	Gallagic acid	-	Organic acid and Its derivatives	有机酸及其衍生物	Organic acid and Its derivatives	有机酸及其衍生物	C28H12O16	3	0.5957	-	TRUE	TRUE	TRUE	2187.29	3623.39	2922.32	4526.43	3232.45	3369	1351.55	765.712	818.086	1276.11	1054.57	898.372	4372.11	5156.98	7559.18	5226.11	3750.75	6571.49	8899.72	5199.2	6904.34	10496.8	11568.5	6456.48	-
MW0056988	PC(18:1(11Z)/18:2(9Z,12Z))	PC(18:1(11Z)/18:2(9Z,12Z))	GP	甘油磷脂类	PC	磷脂酰胆碱	C44H82NO8P	3	0.5572	-	TRUE	TRUE	TRUE	83476.6	278178	126015	322186	198642	114105	118844	153940	304979	227953	137946	171511	521094	392332	450612	419412	358979	516099	246220	239988	325729	280715	290517	222559	-
MW0056916	1-(9Z-hexadecenoyl)-2-pentadecanoyl-glycero-3-phosphocholine	PC(16:1(9Z)/15:0)	GP	甘油磷脂类	PC	磷脂酰胆碱	C39H76NO8P	3	0.5461	-	TRUE	TRUE	TRUE	156094	209435	182462	196364	132099	217089	126054	166465	176746	123990	33891.6	83723.3	576524	672961	398094	407206	358443	322406	282106	231125	252187	234580	208757	273264	-
MW0135751	6-{[2-(2,4-dihydroxyphenyl)-7-methoxy-6-(3-methylbut-1-en-1-yl)-3-(3-methylbut-2-en-1-yl)-4-oxo-4H-chromen-5-yl]oxy}-3,4,5-trihydroxyoxane-2-carboxylic acid	6-{4-[5，7-二羟基-6-(3-甲基丁-1-烯-1-基)-3-(3-甲基丁-2-烯-1-基)-4-氧代-4H-苯并吡喃-2-基]-3-羟基苯氧基}-3，4，5-三羟基氧烷-2-羧酸	Benzene and substituted derivatives	苯及其衍生物	Benzene and substituted derivatives	苯及其衍生物	C32H36O12	3	0.5364	-	TRUE	TRUE	TRUE	37795.5	33563.6	36474.8	43323	38014.2	40254	35533.4	37042.3	42370.7	37799.5	40991.5	34992.7	23931.5	36127.7	23568.2	25161.4	27240	25487.6	29562.4	35076.1	29691.4	28037.4	26693.5	27807	-
MEDN1854	9,10-Dihydroxystearic acid	9,10-二羟基硬脂酸	FA	脂肪酰类	FFA	游离脂肪酸	C18H36O4	3	0.5177	-	TRUE	TRUE	TRUE	3578.15	2562.8	3246.12	2784.77	2825.88	3009.79	31305.5	36552.7	35303.7	36994	31612.6	30610.7	16.254	572.18	1013.72	1176.44	1170.52	2712.1	1961.07	2144.44	1381.76	1062.74	7.965	15.18	C19622
